# Supplementary material for: Spontaneous mutation in the AgrRS two-component regulatory system ofCupriavidus metalliduransresults in enhanced silver resistance
Source: Royal Society of Chemistry journal article supplement (doi:10.1039/c9mt00123a), 2019-01-01
Supplement: c9mt00123a1.pdf [file c9mt00123a1.pdf]

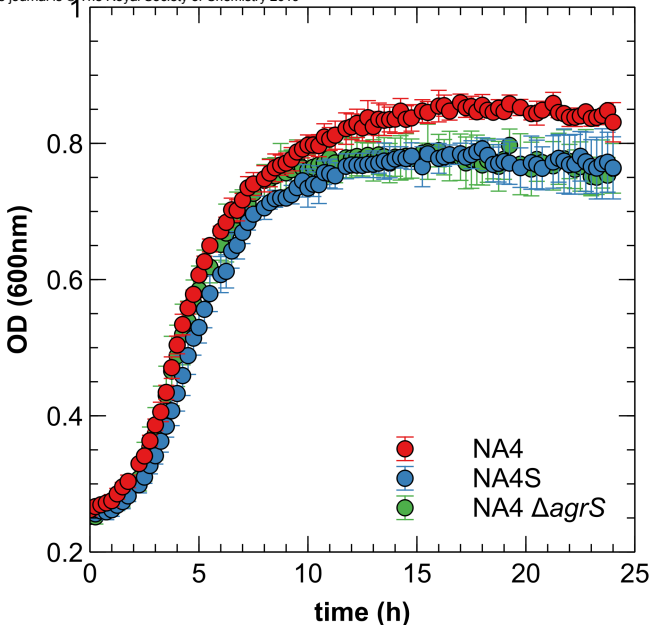

Supplementary Figure S1: Growth curve of *C. metallidurans* NA4, NA4S and NA4  $\Delta agrS$  in LB medium. All curves are the average values of three independent experiments with standard deviations.
