# Supplementary material for: Spontaneous mutation in the AgrRS two-component regulatory system ofCupriavidus metalliduransresults in enhanced silver resistance
Source: Royal Society of Chemistry journal article supplement (doi:10.1039/c9mt00123a), 2019-01-01
Supplement: c9mt00123a2.pdf [file c9mt00123a2.pdf]

Supplementary Table S1: Fold change of transcription measured by microarray expression profiling for selected genes.

| CH34 <sup>a</sup> | NA4 <sup>a</sup> | Function                                               | Ident % <sup>b</sup> | Transcription (fold change) <sup>c</sup> |        |        |       |                        |                     |                   |
|-------------------|------------------|--------------------------------------------------------|----------------------|------------------------------------------|--------|--------|-------|------------------------|---------------------|-------------------|
|                   |                  |                                                        |                      | Non-selective condition <sup>d</sup>     |        |        |       | 1 μM AgNO <sub>3</sub> |                     |                   |
|                   |                  |                                                        |                      | CH34S1                                   | CH34S2 | AE104S | NA4S  | CH34S1 <sup>e</sup>    | CH34S2 <sup>e</sup> | CH34 <sup>f</sup> |
| <b>0477</b>       | 40157            | Conserved hypothetical, CopQ-like                      | 100                  | 9.0                                      | 9.1    | 3.9    | 15.8  | 10.0                   | 11.0                | (0.9)             |
| <b>3571</b>       | 10101            | Conserved hypothetical, CopQ-like, PsrQ1               | 100                  | 23.8                                     | 22.0   | 21.2   | 2.9   | 20.2                   | 26.0                | (0.7)             |
| <b>4461</b>       | 570171           | Conserved hypothetical, CopQ-like, PsrQ2               | 100                  | 81                                       | 88.6   | 106.6  | 26.2  | 53.8                   | ND                  | (0.7)             |
| <b>4464</b>       | 570173           | Conserved hypothetical, Czcl                           | 98                   | 5.1                                      | 4.9    | 2.1    | 2.8   | 5.4                    | 5.1                 | (1.1)             |
| <b>4595</b>       | 570182           | Conserved hypothetical, Czcl2                          | 100                  | 7.7                                      | 8.2    | 3.1    | 2.7   | 5.6                    | 6.2                 | 1.9               |
| <b>5118</b>       | 400150           | Outer membrane protein (porin), OmpC family            | 100                  | 8.6                                      | 9.0    | 5.8    | 3.6   | 6.2                    | 5.6                 | (1.2)             |
| <b>1748</b>       | 170093           | Outer membrane lipoprotein, AgrC                       | 100                  | (1.2)                                    | 13.5   | 10.4   | 1.6   | 1.4                    | 19.4                | (1.0)             |
| <b>1749</b>       | 170094           | Membrane fusion protein, AgrB                          | 100                  | (1.3)                                    | 22.7   | 7.9    | (1.3) | 1.3                    | 24.2                | (0.9)             |
| <b>1750</b>       | 170095           | Cation/multidrug efflux pump, AgrA                     | 100                  | 2.1                                      | 8.3    | 5.3    | (1.4) | 2.2                    | 8.7                 | (1.0)             |
| <b>1751</b>       | 170096           | DNA-binding response regulator, AgrR                   | 100                  | 78.5                                     | 65.4   | 81.0   | 54.2  | 83.9                   | 83.1                | (0.8)             |
| <b>1752</b>       | 170097           | Histidine kinase, AgrS                                 | 100                  | 44.4                                     | 38.0   | 30.4   | 16.2  | 46.5                   | 46.1                | (1.0)             |
| <b>3523</b>       | 10050            | Transcriptional regulator, CupR                        | 100                  | (1.7)                                    | 1.5    | (0.8)  | 4.4   | 1.5                    | (1.0)               | 16.3              |
| <b>3524</b>       | 10051            | P-type ATPase, CupA                                    | 100                  | (0.7)                                    | 0.7    | (0.8)  | 3.7   | (0.9)                  | (0.8)               | 43.4              |
| <b>3525</b>       | 10052            | Copper chaperone, CupC                                 | 100                  | (1.7)                                    | 1.6    | (0.7)  | 7.1   | 0.8                    | (1.0)               | 15.7              |
| <b>5030</b>       | 400053           | Protein involved in copper and silver resistance, CusD | 100                  | (0.9)                                    | 0.8    | (0.9)  | 1.4   | 1.3                    | 1.2                 | 5.0               |
| <b>5031</b>       | 400054           | Outer membrane porin, CusC                             | 100                  | (0.7)                                    | 0.7    | (1.1)  | (0.9) | (1.0)                  | (1.0)               | 43.4              |
| <b>5032</b>       | 400055           | Membrane fusion protein, CusB                          | 100                  | (1.0)                                    | (1.0)  | 1.3    | 1.6   | (1.1)                  | (0.9)               | 33.8              |
| <b>5033</b>       | 400056           | Efflux pump, CusA                                      | 100                  | (1.1)                                    | (1.1)  | (1.1)  | (1.3) | 0.8                    | 0.8                 | 43.1              |
| <b>5034</b>       | 400057           | Periplasmic copper-binding protein, CusF               | 100                  | (1.0)                                    | (1.0)  | (1.1)  | 0.8   | 0.6                    | 0.7                 | 13.5              |
| <b>6133</b>       | 350004           | Transmembrane protein, SilD                            | 100                  | (0.9)                                    | (1.1)  | (1.0)  | 2.3   | (1.0)                  | (1.1)               | (1.1)             |
| <b>6134</b>       | 350003           | Outer membrane porin, SilC                             | 100                  | (0.6)                                    | 0.7    | ND     | (1.4) | 1.6                    | 1.4                 | 5.5               |
| <b>6135</b>       | 350002           | Membrane fusion protein, SilB                          | 100                  | 1.6                                      | 1.6    | 1.5    | 2.1   | 1.5                    | (1.4)               | 2.6               |
| <b>6136</b>       | 350001           | Efflux pump, SilA                                      | 100                  | (0.5)                                    | 0.5    | (1.0)  | 2.6   | 1.7                    | 1.7                 | 3.2               |

<sup>a</sup>CH34 (Rmet\_) and NA4 (CmetNA4v1\_) locus tag based on MaGe annotation v1 (Supplementary Table S3 and S4); <sup>b</sup>% protein identity between CH34 and NA4 copy;

<sup>c</sup>Fold change of gene expression measured by microarray expression profiling; <sup>d</sup>Mutant compared to its parental strain in non-selective growth conditions;

<sup>e</sup>Comparison of CH34S1 and CH34S2 to CH34 when exposed to 1 μM AgNO<sub>3</sub> (i.e. a fold change around 1 indicates a similar induction by AgNO<sub>3</sub> for the mutant and parental strain, whereas a fold change similar to that in non-selective condition indicates no induction by AgNO<sub>3</sub>); <sup>f</sup>Exposure of CH34 to 1 μM AgNO<sub>3</sub> (data derived from Monsieurs et al. 2011); Non-significant values (P-value > 0.05) are shown between brackets.
