# Supplementary material for: Spontaneous mutation in the AgrRS two-component regulatory system ofCupriavidus metalliduransresults in enhanced silver resistance
Source: Royal Society of Chemistry journal article supplement (doi:10.1039/c9mt00123a), 2019-01-01
Supplement: c9mt00123a3.pdf [file c9mt00123a3.pdf]

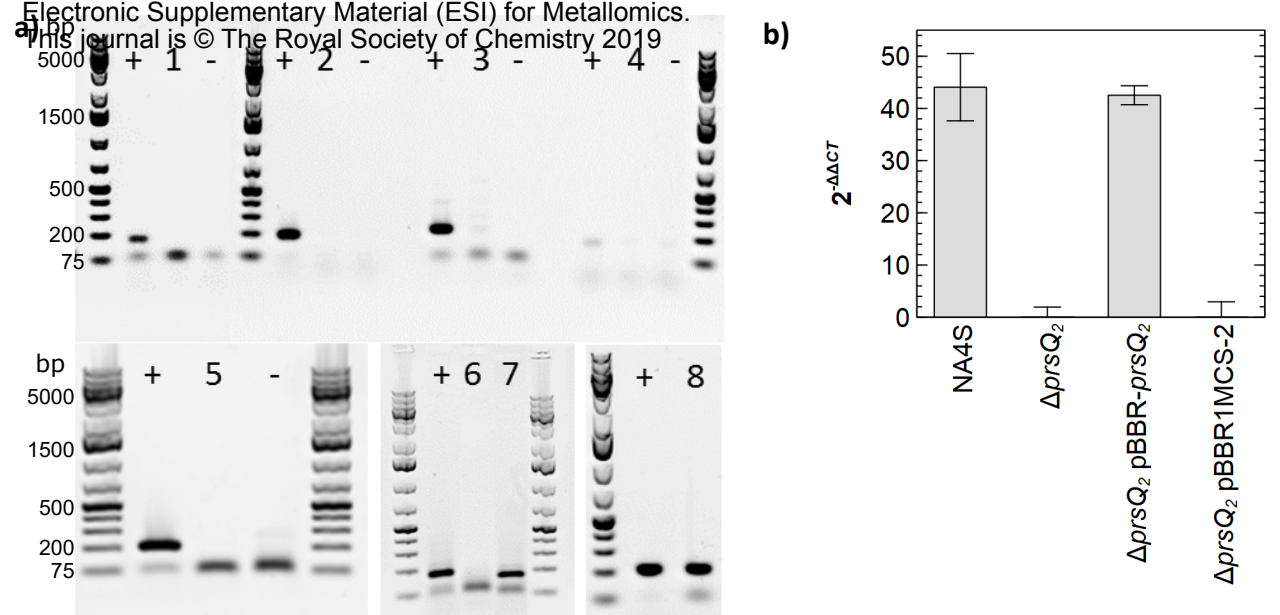

Supplementary Figure S1: Confirmation of mRNA absence in the insertional inactivation mutants and analysis of *prsQ<sub>2</sub>* transcription levels during complementation.

a) PCR amplification of cDNA from the silver-resistant mutant NA4S (+), the insertional inactivation mutants of CmetNA4v1\_40157 (1), CmetNA4v1\_570182 (2), CmetNA4v1\_570173 (3), CmetNA4v1\_400150 (4), *prsQ<sub>2</sub>* (CmetNA4v1\_570171) (5) and *prsQ<sub>1</sub>* (CmetNA4v1\_10101) (6), the complementation mutants of NA4S $\Delta$ *prsQ<sub>1</sub>* (7) and NA4S $\Delta$ *prsQ<sub>2</sub>* (8), and a negative control (-). b) Expression level of *prsQ<sub>2</sub>* obtained by RT-qPCR. Expression levels are normalized to the *uvrD* housekeeping gene and fold change ratios were determined for the silver-resistant mutant NA4S, the insertional inactivation mutant NA4S $\Delta$ *prsQ<sub>2</sub>* ( $\Delta$ *prsQ<sub>2</sub>*), NA4S $\Delta$ *prsQ<sub>2</sub>* complemented with plasmid-based *prsQ<sub>2</sub>* ( $\Delta$ *prsQ<sub>2</sub>* pBBR-*prsQ<sub>2</sub>*) and the NA4S $\Delta$ *prsQ<sub>2</sub>* carrying the empty vector ( $\Delta$ *prsQ<sub>2</sub>* pBBR1MCS2) compared to the parental NA4 strain.
