# Supplementary material for: Spontaneous mutation in the AgrRS two-component regulatory system ofCupriavidus metalliduransresults in enhanced silver resistance
Source: Royal Society of Chemistry journal article supplement (doi:10.1039/c9mt00123a), 2019-01-01
Supplement: c9mt00123a4.pdf [file c9mt00123a4.pdf]

Supplementary Table S2: Overview of all single nucleotide polymorphisms, insertions and deletions in the sequenced silver-resistant mutants CH34S1, CH34S2 and NA4S.

| Strain | Type <sup>a</sup> | Replicon        | Position <sup>b</sup> | Reference | Mutation      | Locus tag     | Gene        | Location <sup>c</sup> | Product                                           |
|--------|-------------------|-----------------|-----------------------|-----------|---------------|---------------|-------------|-----------------------|---------------------------------------------------|
| CH34S1 | INS               | CHR1            | 1900679               | -         | +7TACGCAA     | 1750          | agrA        | promotor              | cation/multidrug efflux pump, RND family          |
| CH34S1 | INS               | CHR1            | 1902600               |           | ISRme3        | 1752          | agrS        |                       | histidine kinase                                  |
| CH34S1 | INS               | CHR1            | 2375581               |           | ISRme3        | 2171          |             |                       | conserved hypothetical protein                    |
| CH34S1 | DEL               | CHR1            | 3626000               | ISRme3    |               |               |             |                       |                                                   |
| CH34S1 | SNP               | CHR2            | 2357183               | A         | C             | 5602          | 5602        | promotor              | putative threonine dehydratase                    |
| CH34S2 | SNP               | CHR1            | 701642                | A         | C             | 635           | 635         | CDS                   | conserved hypothetical protein                    |
| CH34S2 | IND               | CHR1            | 1899865               | -         | +4CGTG        | 1750          | agrA        | CDS                   | cation/multidrug efflux pump, RND family          |
| CH34S2 | INS               | CHR1            | 1901700               |           | IS1086        | 1752          | agrS        |                       | histidine kinase                                  |
| CH34S2 | IND               | CHR1            | 2091186               | -         | +2AC          | 1924          | 1924        | promotor              | short-chain dehydrogenase/reductase               |
| CH34S2 | SNP               | CHR1            | 2184792               | A         | C             | /             |             | intergenic            |                                                   |
| CH34S2 | SNP               | CHR1            | 2351716               | A         | G             | 2154          | evgS        | CDS                   | hybrid sensory histidine kinase                   |
| CH34S2 | DEL               | CHR1            | 3090000               | IS1086    |               |               |             |                       |                                                   |
| CH34S2 | INS               | CHR1            | 3250000               |           | ISRme15       | 2992          | ptxS        |                       | Phosphonate dehydrogenase                         |
| CH34S2 | INS               | CHR1            | 3816700               |           | ISRme5        | 3524          | cupA        |                       | P-type ATPase                                     |
| CH34S2 | SNP               | CHR2            | 786599                | T         | C             | /             |             | intergenic            |                                                   |
| CH34S2 | SNP               | CHR2            | 1014441               | T         | C             | 4419          | bug         | CDS                   | extra-cytoplasmic solute receptor                 |
| CH34S2 | SNP               | CHR2            | 1904802               | A         | G             | 5210          | amnE        | CDS                   | 4-oxalocrotonate decarboxylase                    |
| CH34S2 | SNP               | CHR2            | 2423974               | T         | G             | 5664          | 5664        | CDS                   | conserved hypothetical protein                    |
| NA4S   | INS               | contig1         | 37175                 | -         | +1A           | 10027         | atpE        | promotor              | membrane bound ATP synthase, F0 sector, subunit c |
| NA4S   | INS               | contig2         | 337185                |           | Tn6049/IS1071 | 20338         |             |                       | putative transport protein                        |
| NA4S   | INS               | contig4         | 456000                | -         | +1A           | 40422         |             | CDS                   | protein of unknown function                       |
| NA4S   | INS               | contig4         | 614969                |           | ISRme9        | 40587         |             |                       | protein of unknown function                       |
| NA4S   | SNP               | contig5         | 2                     | T         | C             | 40708         | aroG        | promotor              | DAHPh synthetase                                  |
| NA4S   | INS               | contig5         | 12079                 | -         | +1C           | 50008         |             | CDS                   | subtilisin-like protein                           |
| NA4S   | INS               | contig5         | 58338                 | -         | +1G           | 50055         |             | CDS                   | putative ComEC/Rec2 family protein                |
| NA4S   | SNP               | contig13        | 178                   | T         | C             | 130001        | ygjE        | CDS                   | putative tartrate:succinate antiporter            |
| NA4S   | SNP               | contig14        | 70936                 | G         | T             | 140059        |             | CDS                   | putative ATP-independent periplasmic transporter  |
| NA4S   | INS               | contig14        | 294503                | -         | +1G           | /             |             | intergenic            |                                                   |
| NA4S   | INS               | contig15        | 28539                 | -         | +1G           | 150029        |             | CDS                   | protein of unknown function                       |
| NA4S   | INS               | contig15        | 33194                 | -         | +1T           | /             |             | intergenic            |                                                   |
| NA4S   | INS               | contig15        | 41644                 |           | Tn6049/IS1071 | 150048        | ldcA        |                       | L, D-carboxypeptidase A                           |
| NA4S   | INS               | contig17        | 23965                 | -         | +1T           | /             |             | intergenic            |                                                   |
| NA4S   | <b>SNP</b>        | <b>contig17</b> | <b>96120</b>          | <b>C</b>  | <b>T</b>      | <b>170097</b> | <b>agrS</b> | <b>CDS</b>            | <b>histidine kinase</b>                           |
| NA4S   | INS               | contig20        | 62207                 | -         | +1T           | /             |             | intergenic            |                                                   |
| NA4S   | INS               | contig21        | 50260                 | -         | +1A           | 210048        |             | CDS                   | conserved hypothetical protein                    |

| Strain | Type <sup>a</sup> | Replicon  | Position <sup>b</sup> | Reference | Mutation   | Locus tag | Gene   | Location <sup>c</sup> | Product                                 |
|--------|-------------------|-----------|-----------------------|-----------|------------|-----------|--------|-----------------------|-----------------------------------------|
| NA4S   | DEL               | contig21  | 163790                | -         | -1A        | /         |        | intergenic            |                                         |
| NA4S   | DEL               | contig22  | 12                    | -         | -1T        | /         |        | intergenic            |                                         |
| NA4S   | INS               | contig22  | 60459                 | -         | +1C        | 220059    |        | promotor              | putative Nudix hydrolase family protein |
| NA4S   | INS               | contig22  | 77866                 | -         | +1A        | /         |        | intergenic            |                                         |
| NA4S   | SNP               | contig25  | 14                    | G         | A          | tRNA35    | tRNA35 | promotor              | Trp tRNA                                |
| NA4S   | INS               | contig25  | 21                    | -         | +1G        | tRNA35    | tRNA35 | promotor              | Trp tRNA                                |
| NA4S   | SNP               | contig26  | 132                   | T         | C          | /         |        | intergenic            |                                         |
| NA4S   | INS               | contig28  | 26284                 | -         | +1C        | /         |        | intergenic            |                                         |
| NA4S   | INS               | contig28  | 26295                 | -         | +1T        | /         |        | intergenic            |                                         |
| NA4S   | INS               | contig30  | 11070                 | -         | +1C        | /         |        | intergenic            |                                         |
| NA4S   | INS               | contig30  | 11075                 | -         | +1G        | /         |        | intergenic            |                                         |
| NA4S   | INS               | contig30  | 11081                 | -         | +1T        | /         |        | intergenic            |                                         |
| NA4S   | INS               | contig34  | 22290                 | -         | +1C        | 340025    |        | CDS                   | conserved protein of unknown function   |
| NA4S   | INS               | contig34  | 22309                 | -         | +2GC       | 340025    |        | CDS                   | conserved protein of unknown function   |
| NA4S   | INS               | contig34  | 22311                 | -         | +2GC       | 340025    |        | CDS                   | conserved protein of unknown function   |
| NA4S   | INS               | contig35  | 12834                 | -         | +1G        | 350015    |        | CDS                   | protein of unknown function             |
| NA4S   | SNP               | contig37  | 8                     | C         | T          | 360013    |        | promotor              | Site-specific recombinase               |
| NA4S   | SNP               | contig40  | 312169                | G         | A          | 410001    |        | promotor              | conserved protein of unknown function   |
| NA4S   | SNP               | contig41  | 52                    | G         | C          | 410001    |        | CDS                   | conserved protein of unknown function   |
| NA4S   | DEL               | contig46  | 25929                 | -         | -8CTACGGCT | /         |        | intergenic            |                                         |
| NA4S   | SNP               | contig50  | 17723                 | T         | C          | 500021    | copB   | CDS                   | Copper resistance protein B precursor   |
| NA4S   | SNP               | contig50  | 17783                 | A         | G          | 500021    | copB   | CDS                   | Copper resistance protein B precursor   |
| NA4S   | SNP               | contig50  | 17792                 | A         | C          | 500021    | copB   | CDS                   | Copper resistance protein B precursor   |
| NA4S   | SNP               | contig50  | 17813                 | C         | G          | 500021    | copB   | CDS                   | Copper resistance protein B precursor   |
| NA4S   | SNP               | contig50  | 17852                 | G         | A          | 500021    | copB   | CDS                   | Copper resistance protein B precursor   |
| NA4S   | SNP               | contig50  | 17918                 | A         | G          | 500021    | copB   | CDS                   | Copper resistance protein B precursor   |
| NA4S   | SNP               | contig50  | 17977                 | T         | G          | 500021    | copB   | CDS                   | Copper resistance protein B precursor   |
| NA4S   | SNP               | contig50  | 18031                 | G         | T          | 500021    | copB   | CDS                   | Copper resistance protein B precursor   |
| NA4S   | SNP               | contig61  | 271100                | T         | C          | 610253    |        | CDS                   | conserved hypothetical protein          |
| NA4S   | INS               | contig63  | 101621                | -         | +1G        | 630097    |        | promotor              | conserved protein of unknown function   |
| NA4S   | SNP               | contig66  | 8019                  | A         | G          | /         |        | intergenic            |                                         |
| NA4S   | INS               | contig78  | 72401                 | -         | +1A        | /         |        | intergenic            |                                         |
| NA4S   | INS               | contig78  | 139300                | -         | +1C        | 780194    |        | promotor              | conserved protein of unknown function   |
| NA4S   | SNP               | contig81  | 9354                  | C         | T          | 810013    |        | promotor              | conserved protein of unknown function   |
| NA4S   | SNP               | contig81  | 9364                  | A         | G          | 810013    |        | promotor              | conserved protein of unknown function   |
| NA4S   | SNP               | contig114 | 1                     | T         | G          | 1140001   |        | promotor              | conserved protein of unknown function   |

---

| <b>Strain</b> | <b>Type<sup>a</sup></b> | <b>Replicon</b> | <b>Position<sup>b</sup></b> | <b>Reference</b> | <b>Mutation</b> | <b>Locus tag</b> | <b>Gene</b> | <b>Location<sup>c</sup></b> | <b>Product</b> |
|---------------|-------------------------|-----------------|-----------------------------|------------------|-----------------|------------------|-------------|-----------------------------|----------------|
|---------------|-------------------------|-----------------|-----------------------------|------------------|-----------------|------------------|-------------|-----------------------------|----------------|

---

<sup>a</sup>DEL: deletion, INS: insertion, SNP: single nucleotide polymorphism; <sup>b</sup>Relative position in contig for NA4S; <sup>c</sup>Location of mutation relative to CDS.
