# Supplementary material for: Spontaneous mutation in the AgrRS two-component regulatory system ofCupriavidus metalliduransresults in enhanced silver resistance
Source: Royal Society of Chemistry journal article supplement (doi:10.1039/c9mt00123a), 2019-01-01
Supplement: c9mt00123a5.pdf [file c9mt00123a5.pdf]

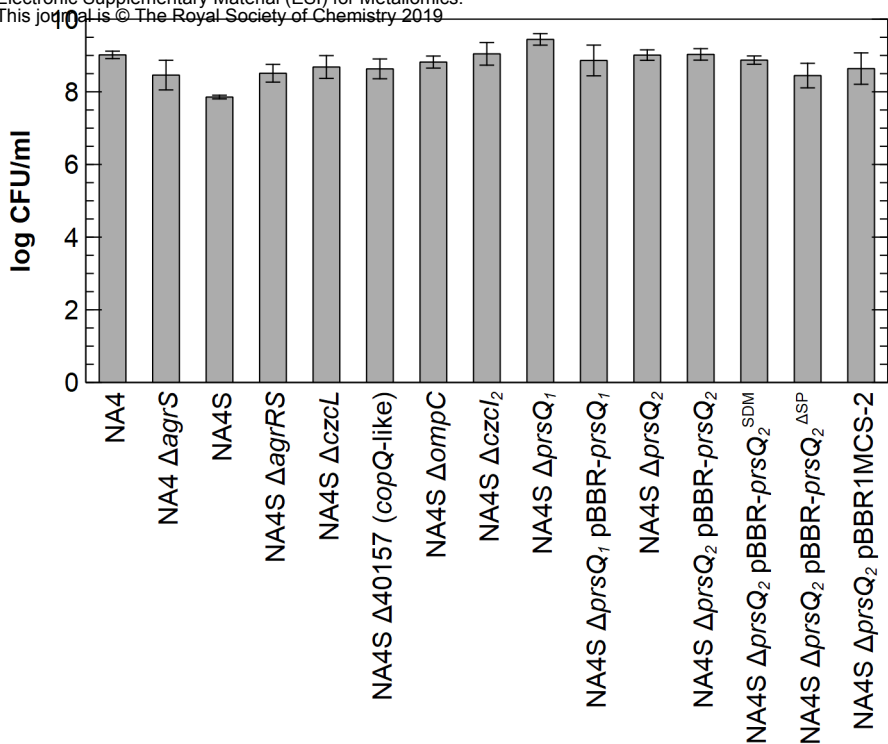

Supplementary Figure S2: Total viable count of all strains and constructs on LB agar. Total viable count on LB agar after 3 days on 30°C of *C. metallidurans* NA4, the silver-resistant mutant NA4S, insertional inactivation mutants of NA4 and NA4S (preceding  $\Delta$ ), and complementation strains (designated with pBBR; pBBR-*prsQ*<sub>2</sub><sup>SDM</sup>: complementation of *prsQ*<sub>2</sub> with a frameshift mutation in the start codon; pBBR-*prsQ*<sub>2</sub><sup>ASP</sup>: complementation of *prsQ*<sub>2</sub> without signal peptide). The average values of three independent experiments with standard deviations are shown.
