# Supplementary material for: Spontaneous mutation in the AgrRS two-component regulatory system ofCupriavidus metalliduransresults in enhanced silver resistance
Source: Royal Society of Chemistry journal article supplement (doi:10.1039/c9mt00123a), 2019-01-01
Supplement: c9mt00123a6.xlsx [file c9mt00123a6.xlsx]

## Sheet: NA4
	Supplementary Table S3: C. metallidurans NA4 annotation
Label	Type	Frame	Begin	End	Length	Evidence	Mutation	Gene	Synonyms	Product	Class	ProductType	Localization	Roles	ECnumber	MicroCycRid	MicroCycPid	RheaRid	AnnotatedRid	AmigeneStatus	PubmedID	Note	BioProcess
CmetNA4v1_10001	CDS	-1	42	1544	1503	automatic/finished	no	hemN	yihJ	coproporphyrinogen III oxidase, O2-independent, SAM and NAD(P)H dependent	2a : Function from experimental evidences in other organisms	e : enzyme	1 : Unknown	1.5.3.12 : Heme, porphyrin ;	1.3.99.22	HEMN-RXN	HEMESYN2-PWY$PWY0-1415			no	12114526		4.3 : Heme, porphyrin, and cobalamin ;
CmetNA4v1_10002	CDS		1780	2958	1179	automatic/finished	no			putative ABC-type branched-chain amino acid transport systems periplasmic component	3 : Putative function from multiple computational evidences	t : transporter	9 : Periplasmic	4.3.A.1.p : periplasmic binding component ;						no			7 : Transport and binding proteins ;
CmetNA4v1_10003	CDS	-1	2982	4295	1314	automatic/finished	no	envZ		Periplasmic sensor signal transduction histidine kinase										no
CmetNA4v1_10004	CDS	-3	4300	5031	732	automatic/finished	no	ompR		Transcriptional regulatory protein ompR										no
CmetNA4v1_10005	CDS	-3	5356	7443	2088	automatic/finished	no	rep	mbrA, mmrA	DNA helicase and single-stranded DNA-dependent ATPase	2a : Function from experimental evidences in other organisms	e : enzyme	2 : Cytoplasmic	2.1.1 : DNA replication ; 7.1 : Cytoplasm ;	3.6.1.-	RXN0-4261				no	9288744		8.1 : DNA replication, recombination, and repair ;
CmetNA4v1_10006	CDS		7737	7958	222	automatic/finished	no			putative lipoprotein	3 : Putative function from multiple computational evidences	lp : lipoprotein	1 : Unknown							no
CmetNA4v1_miscRNA1	misc_RNA		8113	8200	88	automatic/finished	no			Glycine												Predicted by Rfam, accession=RF00504, e-value=3.8e-08.
CmetNA4v1_miscRNA2	misc_RNA		8222	8341	120	automatic/finished	no			Glycine												Predicted by Rfam, accession=RF00504, e-value=4.5e-06.
CmetNA4v1_10007	CDS		8449	9576	1128	automatic/finished	no	gcvT		glycine cleavage complex protein T, aminomethyltransferase, tetrahydrofolate-dependent	2a : Function from experimental evidences in other organisms	e : enzyme	1 : Unknown	1.1.3.5 : Glycine cleavage ; 1.7.17 : Formyl-tetrahydrofolate biosynthesis ;	2.1.2.10	GCVT-RXN$RXN-8629$GCVP-RXN$GCVMULTI-RXN	GLYCLEAV-PWY$GLYCINE-SYN2-PWY$1CMET2-PWY$PWY-2201			no	8375392		4.2 : Folic acid ; 6.2 : Amino acids and amines ;
CmetNA4v1_10008	CDS		9680	10060	381	automatic/finished	no	gcvH		glycine cleavage complex protein H, carrier of aminomethyl moiety via covalently bound lipoyl cofactor	2a : Function from experimental evidences in other organisms	c : carrier	1 : Unknown	1.1.3.5 : Glycine cleavage ; 1.7.17 : Formyl-tetrahydrofolate biosynthesis ;		GCVT-RXN$RXN-8629$GCVP-RXN$GCVMULTI-RXN	GLYCLEAV-PWY$GLYCINE-SYN2-PWY$1CMET2-PWY$PWY-2201			no	8375392		4.2 : Folic acid ; 6.2 : Amino acids and amines ;
CmetNA4v1_10009	CDS		10146	13070	2925	automatic/finished	no	gcvP		glycine cleavage complex protein P, glycine decarboxylase, PLP-dependent	2a : Function from experimental evidences in other organisms	e : enzyme	1 : Unknown	1.1.3.5 : Glycine cleavage ; 1.7.17 : Formyl-tetrahydrofolate biosynthesis ;	1.4.4.2	GCVT-RXN$RXN-8629$GCVP-RXN$GCVMULTI-RXN	GLYCLEAV-PWY$GLYCINE-SYN2-PWY$1CMET2-PWY$PWY-2201			no	8375392		4.2 : Folic acid ; 6.2 : Amino acids and amines ;
CmetNA4v1_10010	CDS		13179	14555	1377	automatic/finished	no	sdaA		L-serine deaminase I	2a : Function from experimental evidences in other organisms	e : enzyme	1 : Unknown	1.1.3.10 : Lysine cleavage ; 1.1.3.2 : L-serine degradation ; 1.1.3.7 : Threonine catabolism ;	4.3.1.17	4.3.1.17-RXN	SERDEG-PWY			no	15155761		6.2 : Amino acids and amines ;
CmetNA4v1_10011	CDS		14648	15394	747	automatic/finished	no			putative hydroxyacylglutathione hydrolase	3 : Putative function from multiple computational evidences	e : enzyme	1 : Unknown	1 : Metabolism ;	3.1.2.6	RXN-7919$GLYOXII-RXN	PWY-5386			no			18.1 : Enzymes of unknown specificity ;
CmetNA4v1_10012	CDS	-2	15431	16549	1119	automatic/finished	no	ybdK		ATP-dependent carboxylate-amine ligase	2b : Function from indirect experimental evidences (e.g. phenotypes)	e : enzyme	2 : Cytoplasmic	1.5.3.10 : Glutathione ;	6.3.-.-					no	15211520		4.10 : Glutathione and analogs ;
CmetNA4v1_10013	CDS	-3	16549	17769	1221	automatic/finished	no			conserved hypothetical protein; putative membrane protein; putative Naﱿ exchanger	4 : Unknown function but conserved in other organisms	u : unknown	11 : Membrane							no			18 : Unknown function ;
CmetNA4v1_10014	CDS	-1	17910	19865	1956	automatic/finished	no			conserved hypothetical protein	4 : Unknown function but conserved in other organisms	u : unknown	1 : Unknown							no			18 : Unknown function ;
CmetNA4v1_10015	CDS	-1	20067	21218	1152	automatic/finished	no			putative ABC-type branched-chain amino acid transport system, periplasmic component	3 : Putative function from multiple computational evidences	t : transporter	9 : Periplasmic	4.3.A.1.p : periplasmic binding component ;						no			7 : Transport and binding proteins ;
CmetNA4v1_10016	CDS	-3	21373	25335	3963	automatic/finished	no	putA	poaA, putC	multifunctional: transcriptional repressor of proline utilization; proline dehydrogenase; pyrroline-5-carboxylate dehydrogenase	2a : Function from experimental evidences in other organisms	e : enzyme	2 : Cytoplasmic	1.1.3.5 : Glycine cleavage ; 1.4.1 : Electron donor ; 2.2.2 : Transcription related ; 3.1.2.3 : Repressor ; 7.1 : Cytoplasm ;	1.5.99.8, 1.5.1.12	RXN-821$PYRROLINECARBDEHYDROG-RXN	PROUT-PWY$ARGASEDEG-PWY			no	12514740		6.2 : Amino acids and amines ; 6.5 : Electron transport ; 9 : Transcription ; 12.1 : DNA interactions ;
CmetNA4v1_10017	CDS	-1	25533	27827	2295	automatic/finished	no	priA	srgA	primosomal protein N' (factor Y) , ATP-dependent DNA helicase	2a : Function from experimental evidences in other organisms	f : factor	2 : Cytoplasmic	2.1.1 : DNA replication ; 2.1.4 : DNA repair ;						no	14762016		8.1 : DNA replication, recombination, and repair ;
CmetNA4v1_10018	CDS	-1	28329	29432	1104	automatic/finished	no	hemE		uroporphyrinogen decarboxylase	2a : Function from experimental evidences in other organisms	e : enzyme	1 : Unknown	1.5.3.12 : Heme, porphyrin ;	4.1.1.37	UROGENDECARBOX-RXN	CHLOROPHYLL-SYN$HEME-BIOSYNTHESIS-II$HEMESYN2-PWY$PWY0-1415			no	2025226		4.3 : Heme, porphyrin, and cobalamin ;
CmetNA4v1_10019	CDS	-3	29548	30504	957	automatic/finished	no			putative hydrolase	3 : Putative function from multiple computational evidences	e : enzyme	1 : Unknown		3.1.1.-					no
CmetNA4v1_10020	CDS	-3	31228	31644	417	automatic/finished	no	atpC	papG, uncC	membrane-bound ATP synthase, F1 sector, epsilon-subunit	2a : Function from experimental evidences in other organisms	e : enzyme	5 : Inner membrane protein	1.3.8 : ATP proton motive force interconversion ; 4.3.A.2 : The Hﳖtranslocating F-, V- and A-type ATPase (F-ATPase) Superfamily ; 6.1 : Membrane ; 7.3 : Inner membrane ;	3.6.3.14	ATPSYN-RXN	PWY-6126			no	16545948		6.4 : ATP-proton motive force interconversion ; 7 : Transport and binding proteins ;
CmetNA4v1_10021	CDS	-3	31783	33186	1404	automatic/finished	no	atpD	papD, uncD, papB, unc	F1 sector of membrane-bound ATP synthase, beta subunit	2b : Function from indirect experimental evidences (e.g. phenotypes)	e : enzyme	5 : Inner membrane protein	1.3.8 : ATP proton motive force interconversion ; 4.3.A.2 : The Hﳖtranslocating F-, V- and A-type ATPase (F-ATPase) Superfamily ; 6.1 : Membrane ; 7.3 : Inner membrane ;	3.6.3.14	ATPSYN-RXN	PWY-6126			no			6.4 : ATP-proton motive force interconversion ; 7 : Transport and binding proteins ;
CmetNA4v1_10022	CDS	-3	33220	34095	876	automatic/finished	no	atpG	papC, uncG	membrane-bound ATP synthase, F1 sector, gamma-subunit	2a : Function from experimental evidences in other organisms	e : enzyme	5 : Inner membrane protein	1.3.8 : ATP proton motive force interconversion ; 4.3.A.2 : The Hﳖtranslocating F-, V- and A-type ATPase (F-ATPase) Superfamily ; 6.1 : Membrane ; 7.3 : Inner membrane ;	3.6.3.14	ATPSYN-RXN	PWY-6126			no	16545948		6.4 : ATP-proton motive force interconversion ; 7 : Transport and binding proteins ;
CmetNA4v1_10023	CDS	-2	34166	35707	1542	automatic/finished	no	atpA	papA, uncA	membrane-bound ATP synthase, F1 sector, alpha-subunit	2a : Function from experimental evidences in other organisms	e : enzyme	5 : Inner membrane protein	1.3.8 : ATP proton motive force interconversion ; 4.3.A.2 : The Hﳖtranslocating F-, V- and A-type ATPase (F-ATPase) Superfamily ; 6.1 : Membrane ; 7.3 : Inner membrane ;	3.6.3.14	ATPSYN-RXN	PWY-6126			no	16545948		6.4 : ATP-proton motive force interconversion ; 7 : Transport and binding proteins ;
CmetNA4v1_10024	CDS	-2	35747	36289	543	automatic/finished	no	atpH	papE, uncH	membrane-bound ATP synthase, F1 sector, delta-subunit	2a : Function from experimental evidences in other organisms	e : enzyme	5 : Inner membrane protein	1.3.8 : ATP proton motive force interconversion ; 4.3.A.2 : The Hﳖtranslocating F-, V- and A-type ATPase (F-ATPase) Superfamily ; 6.1 : Membrane ; 7.3 : Inner membrane ;	3.6.3.14	ATPSYN-RXN	PWY-6126			no	16545948		6.4 : ATP-proton motive force interconversion ; 7 : Transport and binding proteins ;
CmetNA4v1_10025	CDS	-3	36292	36762	471	automatic/finished	no	atpF	papF, uncF	membrane-bound ATP synthase, F0 sector, subunit b	2a : Function from experimental evidences in other organisms	e : enzyme	5 : Inner membrane protein	1.3.8 : ATP proton motive force interconversion ; 4.3.A.2 : The Hﳖtranslocating F-, V- and A-type ATPase (F-ATPase) Superfamily ; 6.1 : Membrane ; 7.3 : Inner membrane ;	3.6.3.14	ATPSYN-RXN	PWY-6126			no	16545948		6.4 : ATP-proton motive force interconversion ; 7 : Transport and binding proteins ;
CmetNA4v1_10026	CDS	-3	36787	36852	66	automatic/finished	no			conserved protein of unknown function	4 : Unknown function but conserved in other organisms	u : unknown	1 : Unknown							no
CmetNA4v1_10027	CDS	-3	36868	37134	267	automatic/finished	no	atpE	RS02552	membrane bound ATP synthase, F0 sector, subunit c	2a : Function from experimental evidences in other organisms	e : enzyme	5 : Inner membrane protein	1.3.8 : ATP proton motive force interconversion ; 4.3.A.2 : The Hﳖtranslocating F-, V- and A-type ATPase (F-ATPase) Superfamily ;	3.6.3.14	ATPSYN-RXN	PWY-6126			no	16545948		6.4 : ATP-proton motive force interconversion ; 7 : Transport and binding proteins ;
CmetNA4v1_10028	CDS	-3	37195	38064	870	automatic/finished	no	atpB	papD, uncB	membrane-bound ATP synthase, F0 sector, subunit a, important for FO assembly	2a : Function from experimental evidences in other organisms	e : enzyme	5 : Inner membrane protein	1.3.8 : ATP proton motive force interconversion ; 2.3.4 : Chaperoning, folding ; 4.3.A.2 : The Hﳖtranslocating F-, V- and A-type ATPase (F-ATPase) Superfamily ; 6.1 : Membrane ; 7.3 : Inner membrane ;	3.6.3.14	ATPSYN-RXN	PWY-6126			no	16545948		6.4 : ATP-proton motive force interconversion ; 7 : Transport and binding proteins ; 11.3 : Protein folding and stabilization ;
CmetNA4v1_10029	CDS	-3	38299	38841	543	automatic/finished	no			membrane-bound ATP synthase subunit I, F1-F0-type proton-ATPase	2b : Function from indirect experimental evidences (e.g. phenotypes)	f : factor	1 : Unknown	1.3.8 : ATP proton motive force interconversion ; 4.3.A.2 : The Hﳖtranslocating F-, V- and A-type ATPase (F-ATPase) Superfamily ;						no	16545948		6.4 : ATP-proton motive force interconversion ; 7 : Transport and binding proteins ;
CmetNA4v1_10030	CDS	-2	39209	40111	903	automatic/finished	no	parB		exonuclease involved in chromosome partitioning, PARB protein	2a : Function from experimental evidences in other organisms	e : enzyme	2 : Cytoplasmic	5.1 : Cell division ; 2.1.1 : DNA replication ;	3.1.11.-					no	9054507		8.1 : DNA replication, recombination, and repair ; 15.1 : Cell division ;
CmetNA4v1_10031	CDS	-2	40148	40957	810	automatic/finished	no	parA		ATPase involved in chromosome partitioning, PARA protein	2a : Function from experimental evidences in other organisms	e : enzyme	2 : Cytoplasmic	5.1 : Cell division ; 2.1.1 : DNA replication ;	2.7.10.2	2.7.10.2-RXN				no	9054507		8.1 : DNA replication, recombination, and repair ; 15.1 : Cell division ;
CmetNA4v1_10032	CDS	-3	40993	41700	708	automatic/finished	no	gidB		glucose-inhibited division protein, contains S-adenosyl-L-methionine-dependent methyltransferase domain	2a : Function from experimental evidences in other organisms	e : enzyme	1 : Unknown	5.1 : Cell division ;	2.1.-.-	RXN-11578				no	12001236		15.1 : Cell division ;
CmetNA4v1_10033	CDS	-3	41701	43665	1965	automatic/finished	no	gidA	trmF, mnmG	tRNA uridine 5-carboxymethylaminomethyl modification enzyme gidA (Glucose-inhibited division protein A)	2a : Function from experimental evidences in other organisms	cp : cell process	2 : Cytoplasmic	5.1 : Cell division ;						no			15.1 : Cell division ;
CmetNA4v1_10034	CDS	-3	43903	44781	879	automatic/finished	no			putative N-formylglutamate amidohydrolase	3 : Putative function from multiple computational evidences	e : enzyme	1 : Unknown	1.7 : Central intermediary metabolism ;	3.5.1.68	N-FORMYLGLUTAMATE-DEFORMYLASE-RXN	PWY-5028			no			5 : Central intermediary metabolism ;
CmetNA4v1_10035	CDS	-3	44785	45804	1020	automatic/finished	no			conserved hypothetical protein, UPF0065	4 : Unknown function but conserved in other organisms	u : unknown	9 : Periplasmic							no	12562821		18 : Unknown function ;
CmetNA4v1_10036	CDS		45935	46837	903	automatic/finished	no			putative transcriptional Regulator, LysR family	3 : Putative function from multiple computational evidences	r : regulator	2 : Cytoplasmic	3.1.2 : Transcriptional level ;						no			12.1 : DNA interactions ;
CmetNA4v1_10037	CDS	-3	46948	47691	744	automatic/finished	no			putative branched-chain amino acid transport system permease, ATP_binding component	3 : Putative function from multiple computational evidences	t : transporter	2 : Cytoplasmic	4.3.A.1.a : ATP binding component ;						no			7 : Transport and binding proteins ;
CmetNA4v1_10038	CDS	-3	47701	49554	1854	automatic/finished	no			putative branched-chain amino acid transport system permease, ATP_binding component	3 : Putative function from multiple computational evidences	t : transporter	5 : Inner membrane protein	4.3.A.1.am : ATP binding and membrane component ;						no			7 : Transport and binding proteins ;
CmetNA4v1_10039	CDS	-3	49558	50610	1053	automatic/finished	no			putative branched-chain amino acid transport system permease, membrane component	3 : Putative function from multiple computational evidences	t : transporter	5 : Inner membrane protein	4.3.A.1.m : membrane component ;						no			7 : Transport and binding proteins ;
CmetNA4v1_10040	CDS	-3	50782	51930	1149	automatic/finished	no			putative branched amino acid transport system permease, periplasmic binding component	3 : Putative function from multiple computational evidences	t : transporter	9 : Periplasmic	4.3.A.1.p : periplasmic binding component ;						no			7 : Transport and binding proteins ;
CmetNA4v1_10041	CDS	-3	52267	53025	759	automatic/finished	no			conserved hypothetical protein, DUF81; putative membrane protein	4 : Unknown function but conserved in other organisms	u : unknown	1 : Unknown							no			18 : Unknown function ;
CmetNA4v1_10042	CDS	-2	53060	53575	516	automatic/finished	no			conserved protein of unknown function	4 : Unknown function but conserved in other organisms	u : unknown	1 : Unknown							no
CmetNA4v1_10043	CDS	-3	53899	54933	1035	automatic/finished	no			putative Branched-chain amino acid transport system permease, membrane component	3 : Putative function from multiple computational evidences	t : transporter	5 : Inner membrane protein	4.3.A.1.m : membrane component ;						no			7 : Transport and binding proteins ;
CmetNA4v1_10044	CDS	-1	54933	55817	885	automatic/finished	no			putative Branched-chain amino acid transport system permease, membrane component	3 : Putative function from multiple computational evidences	t : transporter	5 : Inner membrane protein	4.3.A.1.m : membrane component ;						no			7 : Transport and binding proteins ;
CmetNA4v1_10045	CDS	-2	55991	57199	1209	automatic/finished	no			putative branched-chain amino acid transport system permease, periplasmic component	3 : Putative function from multiple computational evidences	t : transporter	9 : Periplasmic	4.3.A.1.p : periplasmic binding component ;						no			7 : Transport and binding proteins ;
CmetNA4v1_10046	CDS	-2	57299	58024	726	automatic/finished	no			putative branched-chain amino acid transport system permease, ATP binding component	3 : Putative function from multiple computational evidences	t : transporter	2 : Cytoplasmic	1.1.3 : Amino acids ; 1.5.1.18 : Isoleucine/valine ; 1.5.1.19 : Leucine ; 4.3.A.1.a : ATP binding component ; 7.1 : Cytoplasm ;						no			1.4 : Pyruvate family ; 6.2 : Amino acids and amines ; 7 : Transport and binding proteins ;
CmetNA4v1_10047	CDS	-2	58037	58972	936	automatic/finished	no			putative branched-chain amino acid transport system permease, ATP binding component	3 : Putative function from multiple computational evidences	t : transporter	2 : Cytoplasmic	1.1.3 : Amino acids ; 1.5.1.18 : Isoleucine/valine ; 1.5.1.19 : Leucine ; 4.3.A.1.a : ATP binding component ; 7.1 : Cytoplasm ;						no			1.4 : Pyruvate family ; 6.2 : Amino acids and amines ; 7 : Transport and binding proteins ;
CmetNA4v1_10048	CDS	-3	59170	60837	1668	automatic/finished	no			choline oxidase (putative soluble) /choline dehydrogenase, a flavoprotein	2b : Function from indirect experimental evidences (e.g. phenotypes)	e : enzyme	2 : Cytoplasmic	1.7.18 : Betaine biosynthesis ;	1.1.3.17, 1.1.99.1	CHD-RXN$CHOLINE-OXIDASEII-RXN$CHOLINE-OXIDASE-RXN	CHOLINE-BETAINE-ANA-PWY$P542-PWY$BETSYN-PWY$PWY-3721			no			5 : Central intermediary metabolism ;
CmetNA4v1_10049	CDS	-1	60918	61838	921	automatic/finished	no			putative LYSOPHOSPHOLIPASE	3 : Putative function from multiple computational evidences	e : enzyme	1 : Unknown	1 : Metabolism ; 6.1 : Membrane ;	3.1.1.5	LYSOPHOSPHOLIPASE-RXN				no			18.1 : Enzymes of unknown specificity ;
CmetNA4v1_10050	CDS	-3	61945	62364	420	automatic/finished	no			putative Transcriptional regulator, MerR family	3 : Putative function from multiple computational evidences	r : regulator	2 : Cytoplasmic	3.1.2 : Transcriptional level ;						no			12.1 : DNA interactions ;
CmetNA4v1_10051	CDS	-1	62361	64745	2385	automatic/finished	no	copA	ybaR	copper transporting P-type ATPase	2a : Function from experimental evidences in other organisms	t : transporter	5 : Inner membrane protein	4.3.A.3 : The P-type ATPase (P-ATPase) Superfamily ; 6.1 : Membrane ; 7.3 : Inner membrane ;						no			7 : Transport and binding proteins ;
CmetNA4v1_10052	CDS		64985	65185	201	automatic/finished	no			putative Copper ion binding protein; Heavy metal transport/detoxification protein	3 : Putative function from multiple computational evidences	f : factor	1 : Unknown	4.8.A : Accessory Factors Involved in Transport ; 5.6.2 : Detoxification (xenobiotic metabolism) ;						no			7 : Transport and binding proteins ; 15.5 : Detoxification ;
CmetNA4v1_10053	CDS	-1	65250	65975	726	automatic/finished	no			putative Outer membrane protein, OmpW family	3 : Putative function from multiple computational evidences	t : transporter	7 : Outer membrane protein	5.5 : Adaptation to stress ;						no	16414958		15.10 : Adaptations to atypical conditions ;
CmetNA4v1_10054	CDS	-1	66264	67232	969	automatic/finished	no			putative Ornithine cyclodeaminase	3 : Putative function from multiple computational evidences	e : enzyme	1 : Unknown	1.5.1.3 : Arginine ; 1.5.1.4 : Proline ;	4.3.1.12	ORNITHINE-CYCLODEAMINASE-RXN	ARG-GLU-PWY$ORN-AMINOPENTANOATE-CAT-PWY			no			1.3 : Glutamate family ;
CmetNA4v1_10055	CDS	-1	67317	68315	999	automatic/finished	no			conserved protein of unknown function	4 : Unknown function but conserved in other organisms	u : unknown	1 : Unknown							no
CmetNA4v1_10056	CDS	-1	68376	70583	2208	automatic/finished	no	pbpC		Penicillin-binding protein, transglycosylase and transpeptidase	2a : Function from experimental evidences in other organisms	e : enzyme	1 : Unknown	1.6.7 : Peptidoglycan (murein) ; 6.2 : Peptidoglycan (murein) ;	2.4.1.-, 3.4.-.-	RXN0-5405	PEPTIDOGLYCANSYN-PWY			no	20011400		14.2 : Biosynthesis and degradation of murein sacculus and peptidoglycan ;
CmetNA4v1_10057	CDS	-3	70600	71301	702	automatic/finished	no			conserved hypothetical protein; putative membrane protein	4 : Unknown function but conserved in other organisms	u : unknown	1 : Unknown							no			18 : Unknown function ;
CmetNA4v1_10058	CDS	-1	71298	77279	5982	automatic/finished	no			conserved hypothetical protein, COG2373; putative exported protein	4 : Unknown function but conserved in other organisms	u : unknown	1 : Unknown							no			18 : Unknown function ;
CmetNA4v1_10059	CDS	-1	77373	77852	480	automatic/finished	no			putative transcriptional regulator, AsnC family	3 : Putative function from multiple computational evidences	r : regulator	2 : Cytoplasmic	3.1.2 : Transcriptional level ;						no			12.1 : DNA interactions ;
CmetNA4v1_10060	CDS		77991	78923	933	automatic/finished	no	phhA	RS02630	PHENYLALANINE 4-HYDROXYLASE	2a : Function from experimental evidences in other organisms	e : enzyme	1 : Unknown	1.5.1.13 : Phenylalanine ; 1.5.1.14 : Tyrosine ; 1.5.1.15 : Tryptophan ;	1.14.16.1	PHENYLALANINE-4-MONOOXYGENASE-RXN	PWY-6134$PHENYLALANINE-DEG1-PWY			no	12096915, 1655752		1.1 : Aromatic amino acid family ;
CmetNA4v1_10061	CDS		79036	79335	300	automatic/finished	no	phhB	RS02631	PTERIN-4-ALPHA-CARBINOLAMINE DEHYDRATASE	2a : Function from experimental evidences in other organisms	e : enzyme	2 : Cytoplasmic	1.5.1.13 : Phenylalanine ; 1.5.1.14 : Tyrosine ; 1.5.1.15 : Tryptophan ;	4.2.1.96	RXN-7908	PHENYLALANINE-DEG1-PWY			no	15262943		1.1 : Aromatic amino acid family ;
CmetNA4v1_10062	CDS		79436	80140	705	automatic/finished	no			putative response regulator, CheY family	3 : Putative function from multiple computational evidences	r : regulator	2 : Cytoplasmic	3.1.2.4.3 : Two-component regulatory systems (external signal) ;						no			13.1 : Two-component systems ;
CmetNA4v1_10063	CDS		80175	81857	1683	automatic/finished	no			putative sensor hybrid histidine kinase	3 : Putative function from multiple computational evidences	rc : receptor	6 : Inner membrane-associated	3.1.2.4.3 : Two-component regulatory systems (external signal) ;						no	1791760		13.1 : Two-component systems ;
CmetNA4v1_10064	CDS	-1	81891	82403	513	automatic/finished	no			conserved hypothetical protein	5 : Unknown function	u : unknown	1 : Unknown							no			18 : Unknown function ;
CmetNA4v1_10065	CDS		82884	83099	216	automatic/finished	no			conserved protein of unknown function	4 : Unknown function but conserved in other organisms	u : unknown	1 : Unknown							no
CmetNA4v1_10066	CDS		83237	83515	279	automatic/finished	no	hupB	hopD, dpeA	DNA-binding protein HU-beta, NS1 (HU-1), plays a role in DNA replication and in rpo translation	2a : Function from experimental evidences in other organisms	f : factor	2 : Cytoplasmic	2.1.1 : DNA replication ; 2.3.7 : Nucleoproteins, basic proteins ; 3.1.3.1 : Translation attenuation and efficiency ; 7.1 : Cytoplasm ;						no			8.1 : DNA replication, recombination, and repair ; 8.4 : Chromosome-associated proteins ; 12 : Regulatory functions ;
CmetNA4v1_10067	CDS		83754	84734	981	automatic/finished	no			conserved hypothetical protein, COG4322	4 : Unknown function but conserved in other organisms	u : unknown	1 : Unknown							no			18 : Unknown function ;
CmetNA4v1_10068	CDS		85042	85794	753	automatic/finished	no	aqpS		aquaglyceroporin, Major intrinsic protein family	2b : Function from indirect experimental evidences (e.g. phenotypes)	m : membrane component	11 : Membrane	4.2.A. : Porters (Uni-, Sym- and Antiporters) ;						no	16199569		7 : Transport and binding proteins ;
CmetNA4v1_10069	CDS	-2	85778	87508	1731	automatic/finished	no			putative maltoporin	3 : Putative function from multiple computational evidences	t : transporter	11 : Membrane	4.1.B : Beta barrel porins (The Outer Membrane Porin (OMP) Functional Superfamily) ;						no			7.6 : Porins ;
CmetNA4v1_10070	CDS		87574	87831	258	automatic/finished	no			conserved protein of unknown function	4 : Unknown function but conserved in other organisms	u : unknown	1 : Unknown							no
CmetNA4v1_10071	CDS		87845	88984	1140	automatic/finished	no			putative periplasmic solute-binding receptor	3 : Putative function from multiple computational evidences	rc : receptor	9 : Periplasmic							no
CmetNA4v1_10072	CDS		89135	90049	915	automatic/finished	no			putative predicted permease rarD	3 : Putative function from multiple computational evidences	t : transporter	11 : Membrane	4.9.B : Putative uncharacterized transport protein ; 5.6.4 : Drug resistance/sensitivity ; 6.1 : Membrane ;						no			7 : Transport and binding proteins ; 15.8 : Toxin production and resistance ;
CmetNA4v1_10073	CDS		90165	91346	1182	automatic/finished	no	dinB		DNA polymerase IV					2.7.7.7	DNA-DIRECTED-DNA-POLYMERASE-RXN				no
CmetNA4v1_10074	CDS		91407	92603	1197	automatic/finished	no	ydeR		Uncharacterized MFS-type transporter ydeR										no
CmetNA4v1_10075	CDS		92748	94511	1764	automatic/finished	no			conserved protein of unknown function	4 : Unknown function but conserved in other organisms	u : unknown	1 : Unknown							no
CmetNA4v1_10076	CDS	-3	94573	95088	516	automatic/finished	no			conserved hypothetical protein	4 : Unknown function but conserved in other organisms	u : unknown	1 : Unknown							no			18 : Unknown function ;
CmetNA4v1_10077	CDS	-1	95229	95396	168	automatic/finished	no			protein of unknown function	5 : Unknown function	u : unknown	1 : Unknown							no
CmetNA4v1_10078	CDS		95480	96448	969	automatic/finished	no			conserved hypothetical protein, UPF0065	4 : Unknown function but conserved in other organisms	u : unknown	9 : Periplasmic							no	12562821		18 : Unknown function ;
CmetNA4v1_10079	CDS		96676	97149	474	automatic/finished	no			conserved hypothetical protein; putative membrane protein	4 : Unknown function but conserved in other organisms	u : unknown	1 : Unknown							no			18 : Unknown function ;
CmetNA4v1_10080	CDS		97178	98692	1515	automatic/finished	no			conserved hypothetical protein, DUF112	4 : Unknown function but conserved in other organisms	u : unknown	11 : Membrane							no			18 : Unknown function ;
CmetNA4v1_10081	CDS		98798	99214	417	automatic/finished	no			putative enzyme, Thioesterases/thiol ester dehydrase-isomerases superfamily	3 : Putative function from multiple computational evidences	e : enzyme	1 : Unknown							no
CmetNA4v1_10082	CDS		99211	100134	924	automatic/finished	no			conserved hypothetical protein	4 : Unknown function but conserved in other organisms	u : unknown	1 : Unknown							no			18 : Unknown function ;
CmetNA4v1_10083	CDS		100216	101697	1482	automatic/finished	no			putative GLUTATHIONE REDUCTASE OXIDOREDUCTASE	3 : Putative function from multiple computational evidences	e : enzyme	1 : Unknown	1.4 : Energy production/transport ;	1.8.1.7	GLUTATHIONE-REDUCT-NADPH-RXN	GLUT-REDOX-PWY$PWY-4081			no			6.5 : Electron transport ;
CmetNA4v1_10084	CDS	-3	101707	102615	909	automatic/finished	no			Transcriptional regulator, LysR family										no
CmetNA4v1_10085	CDS		102800	104221	1422	automatic/finished	no	bam		Indoleacetamide hydrolase					3.5.1.-	RXNN-404	PWY-3161			no
CmetNA4v1_10086	CDS		104235	104444	210	automatic/finished	no			conserved protein of unknown function	4 : Unknown function but conserved in other organisms	u : unknown	1 : Unknown							no
CmetNA4v1_10087	CDS		104463	105848	1386	automatic/finished	no			Naﻊ► symporter										no
CmetNA4v1_10088	CDS		105865	106059	195	automatic/finished	no			protein of unknown function	5 : Unknown function	u : unknown	1 : Unknown							no
CmetNA4v1_tRNA62	tRNA	-1	105966	106041	76	automatic/finished	no			Phe tRNA												tRNA Phe anticodon GAA, Cove score 86.17
CmetNA4v1_10089	CDS	-3	106099	106815	717	automatic/finished	no			putative RESPONSE REGULATOR	3 : Putative function from multiple computational evidences	r : regulator	2 : Cytoplasmic	3.1.2.4.3 : Two-component regulatory systems (external signal) ;						no			13.1 : Two-component systems ;
CmetNA4v1_10090	CDS	-1	106872	109355	2484	automatic/finished	no			putative SENSOR HISTIDINE KINASE	3 : Putative function from multiple computational evidences	rc : receptor	6 : Inner membrane-associated	3.1.2.4.3 : Two-component regulatory systems (external signal) ;						no	1791760		13.1 : Two-component systems ;
CmetNA4v1_10091	CDS	-2	109352	110182	831	automatic/finished	no			conserved hypothetical protein, PROLINE RICH; putative membrane anchored protein	4 : Unknown function but conserved in other organisms	u : unknown	1 : Unknown							no			18 : Unknown function ;
CmetNA4v1_10092	CDS	-2	110192	111565	1374	automatic/finished	no	rsmB	rrmB, sun, fmu, fmv, y	16S rRNA m5C967 methyltransferase, S-adenosyl-L-methionine-dependent	2a : Function from experimental evidences in other organisms	e : enzyme	2 : Cytoplasmic	2.2.3 : RNA modification ; 2.3.8 : Ribosomal proteins ;	2.1.1.61	RXN-11591				no	14656444		9.4 : RNA processing ; 10.2 : Ribosomal proteins: synthesis and modification ; 10.3 : tRNA and rRNA base modification ;
CmetNA4v1_10093	CDS	-1	111711	112571	861	automatic/finished	no			similar to htpX, putative metalloendopeptidase, family M48	2b : Function from indirect experimental evidences (e.g. phenotypes)	e : enzyme	11 : Membrane	3.1.3.4 : Proteases, cleavage of compounds ;	3.4.24.-					no			12.3 : Protein interactions ;
CmetNA4v1_10094	CDS	-2	112736	113770	1035	automatic/finished	no	fmt	yhdD	10-formyltetrahydrofolate:L-methionyl-tRNA(fMet) N-formyltransferase	2a : Function from experimental evidences in other organisms	e : enzyme	2 : Cytoplasmic	2.2.3 : RNA modification ; 7.1 : Cytoplasm ;	2.1.2.9	METHIONYL-TRNA-FORMYLTRANSFERASE-RXN				no	9086272, 9843487		9.4 : RNA processing ; 10.3 : tRNA and rRNA base modification ;
CmetNA4v1_10095	CDS	-1	113850	114356	507	automatic/finished	no	def	fms	peptide deformylase	2a : Function from experimental evidences in other organisms	e : enzyme	1 : Unknown	2.3.3 : Posttranslational modification ;	3.5.1.31	3.5.1.88-RXN				no	7896716, 8244948		11.2 : Protein modification and repair ;
CmetNA4v1_10096	CDS		114521	115696	1176	automatic/finished	no			conserved hypothetical protein; putative peptidoglycan binding protein, LysM domain; putative exported protein	4 : Unknown function but conserved in other organisms	u : unknown	1 : Unknown							no			18 : Unknown function ;
CmetNA4v1_10097	CDS		115735	116850	1116	automatic/finished	no	smf	RS02247	similar to smf, putative DNA processing chain A (drpA); putative exported protein	2b : Function from indirect experimental evidences (e.g. phenotypes)	f : factor	1 : Unknown	5.4 : Genetic exchange, recombination ;						no	7768823		15 : Cellular processes ;
CmetNA4v1_10098	CDS		116887	117276	390	automatic/finished	no			PUTATIVE THIOREDOXIN	3 : Putative function from multiple computational evidences	e : enzyme	1 : Unknown	1.4 : Energy production/transport ;						no			6.5 : Electron transport ;
CmetNA4v1_10099	CDS		117452	120127	2676	automatic/finished	no	topB	RS02245	DNA TOPOISOMERASE III	2a : Function from experimental evidences in other organisms	e : enzyme	2 : Cytoplasmic	2.1.1 : DNA replication ; 3.1.1.1 : DNA bending, supercoiling, inversion ;	5.99.1.2	5.99.1.2-RXN				no	10574789		8.1 : DNA replication, recombination, and repair ; 12 : Regulatory functions ;
CmetNA4v1_10100	CDS	-1	120186	121118	933	automatic/finished	no			putative transcriptional regulator, LysR family	3 : Putative function from multiple computational evidences	r : regulator	2 : Cytoplasmic	3.1.2 : Transcriptional level ;						no			12.1 : DNA interactions ;
CmetNA4v1_10101	CDS		121311	121559	249	automatic/finished	no			conserved hypothetical protein; putative exported protein	4 : Unknown function but conserved in other organisms	u : unknown	1 : Unknown							no			18 : Unknown function ;
CmetNA4v1_10102	CDS	-1	121689	122132	444	automatic/finished	no			conserved hypothetical protein, putative membrane protein	4 : Unknown function but conserved in other organisms	u : unknown	11 : Membrane							no			18 : Unknown function ;
CmetNA4v1_10103	CDS	-3	122368	122562	195	automatic/finished	no			conserved hypothetical protein, DUF466	4 : Unknown function but conserved in other organisms	u : unknown	1 : Unknown							no			18 : Unknown function ;
CmetNA4v1_10104	CDS	-2	122579	124654	2076	automatic/finished	no	cstA	ybdC	carbon starvation protein	2b : Function from indirect experimental evidences (e.g. phenotypes)	m : membrane component	5 : Inner membrane protein	5.5.3 : Starvation response ; 6.1 : Membrane ; 7.3 : Inner membrane ;						no			15.10 : Adaptations to atypical conditions ;
CmetNA4v1_10105	CDS		125040	126428	1389	automatic/finished	no			putative SENSOR HISTIDINE KINASE	3 : Putative function from multiple computational evidences	rc : receptor	6 : Inner membrane-associated	3.1.2.4.3 : Two-component regulatory systems (external signal) ;						no			13.1 : Two-component systems ;
CmetNA4v1_10106	CDS		126425	127111	687	automatic/finished	no			putative response regulator, LuxR family	3 : Putative function from multiple computational evidences	r : regulator	2 : Cytoplasmic	3.1.2.4.3 : Two-component regulatory systems (external signal) ;						no			13.1 : Two-component systems ;
CmetNA4v1_10107	CDS	-1	127200	129056	1857	automatic/finished	no	pckG	pckA, RS01839	PHOSPHOENOLPYRUVATE CARBOXYKINASE	2b : Function from indirect experimental evidences (e.g. phenotypes)	e : enzyme	2 : Cytoplasmic	1.3.4 : Tricarboxylic acid cycle ; 1.7.28 : Pyruvate catabolism ;	4.1.1.32	PEPCARBOXYKIN-RXN$4.1.1.38-RXN$RXN-12481$4.1.1.32-RXN	GLUCONEO-PWY			no			6.12 : TCA cycle ;
CmetNA4v1_10108	CDS		129495	130595	1101	automatic/finished	no	serA	RS01838	D-3-PHOSPHOGLYCERATE DEHYDROGENASE / D-isomer specific 2-hydroxyacid dehydrogenase	2b : Function from indirect experimental evidences (e.g. phenotypes)	e : enzyme	2 : Cytoplasmic	1.5.1.8 : Threonine ; 1.5.1.10 : Glycine ; 1.5.1.11 : Serine ;	1.1.1.95	PGLYCDEHYDROG-RXN	SERSYN-PWY			no			1.2 : Aspartate family ; 1.5 : Serine family ;
CmetNA4v1_10109	CDS		130763	131131	369	automatic/finished	no			conserved hypothetical protein	4 : Unknown function but conserved in other organisms	u : unknown	1 : Unknown							no			18 : Unknown function ;
CmetNA4v1_10110	CDS		131352	132008	657	automatic/finished	no			conserved hypothetical protein, MOSC domain (MOCO sulphurase C-terminal)	4 : Unknown function but conserved in other organisms	u : unknown	1 : Unknown							no			18 : Unknown function ;
CmetNA4v1_10111	CDS		132273	133496	1224	automatic/finished	no			putative secretion protein, HlyD family	3 : Putative function from multiple computational evidences	f : factor	6 : Inner membrane-associated	2.3.5 : Export, signal peptide cleavage ;						no			11.1 : Protein and peptide secretion and trafficking ;
CmetNA4v1_10112	CDS		133501	136710	3210	automatic/finished	no			putative multidrug transporter, RND family	3 : Putative function from multiple computational evidences	t : transporter	7 : Outer membrane protein	4.2.A.6 : The Resistance-Nodulation-Cell Division (RND) Superfamily ; 5.6.4 : Drug resistance/sensitivity ; 6.1 : Membrane ; 7.4 : Outer membrane ;						no			7 : Transport and binding proteins ; 15.8 : Toxin production and resistance ;
CmetNA4v1_10113	CDS		136795	137631	837	automatic/finished	no			putative lipoprotein	3 : Putative function from multiple computational evidences	lp : lipoprotein	1 : Unknown							no
CmetNA4v1_10114	CDS	-3	137656	139143	1488	automatic/finished	no			putative SENSOR histidine KINASE	3 : Putative function from multiple computational evidences	rc : receptor	6 : Inner membrane-associated	3.1.2.4.3 : Two-component regulatory systems (external signal) ;						no			13.1 : Two-component systems ;
CmetNA4v1_10115	CDS	-1	139143	139817	675	automatic/finished	no			putative response regulator	3 : Putative function from multiple computational evidences	r : regulator	2 : Cytoplasmic	3.1.2.4.3 : Two-component regulatory systems (external signal) ;						no			13.1 : Two-component systems ;
CmetNA4v1_10116	CDS		140015	141130	1116	automatic/finished	no			conserved hypothetical protein	4 : Unknown function but conserved in other organisms	u : unknown	1 : Unknown							no			18 : Unknown function ;
CmetNA4v1_10117	CDS	-1	141198	141989	792	automatic/finished	no	acrR	ybaH	transcriptional repressor for acridine efflux pump ACRAB, multidrug efflux system repressor (TetR/AcrR family)	2a : Function from experimental evidences in other organisms	r : regulator	2 : Cytoplasmic	2.2.2 : Transcription related ; 3.1.2.3 : Repressor ; 3.3.1 : Operon (regulation of one operon) ; 5.6.4 : Drug resistance/sensitivity ; 7.1 : Cytoplasm ;						no	8821940		9 : Transcription ; 12.1 : DNA interactions ; 15.8 : Toxin production and resistance ;
CmetNA4v1_10118	CDS		141979	142161	183	automatic/finished	no			conserved protein of unknown function	4 : Unknown function but conserved in other organisms	u : unknown	1 : Unknown							no
CmetNA4v1_10119	CDS		142418	143665	1248	automatic/finished	no	acrA	Mb, lir, mbl, mtcA, si	component of acridine efflux pump, multidrug efflux system	2a : Function from experimental evidences in other organisms	t : transporter	5 : Inner membrane protein	4.2.A.6 : The Resistance-Nodulation-Cell Division (RND) Superfamily ; 5.6.4 : Drug resistance/sensitivity ; 6.1 : Membrane ; 7.3 : Inner membrane ;						no	15155734		7 : Transport and binding proteins ; 15.8 : Toxin production and resistance ;
CmetNA4v1_10120	CDS		143692	146844	3153	automatic/finished	no	acrB	acrE	component of acridine efflux pump, multidrug efflux system	2a : Function from experimental evidences in other organisms	t : transporter	5 : Inner membrane protein	4.2.A.6 : The Resistance-Nodulation-Cell Division (RND) Superfamily ; 5.6.4 : Drug resistance/sensitivity ; 6.1 : Membrane ; 7.3 : Inner membrane ;						no	15155734		7 : Transport and binding proteins ; 15.8 : Toxin production and resistance ;
CmetNA4v1_10121	CDS		146847	148322	1476	automatic/finished	no			putative outer membrane protein	3 : Putative function from multiple computational evidences	t : transporter	7 : Outer membrane protein	4.1.B.17 : The Outer Membrane Factor (OMF) Family ; 6.1 : Membrane ; 7.4 : Outer membrane ; 4.2.A.6 : The Resistance-Nodulation-Cell Division (RND) Superfamily ;						no			7.6 : Porins ;
CmetNA4v1_10122	CDS	-2	148397	149257	861	automatic/finished	no			putative Outer membrane protein, OmpW family	3 : Putative function from multiple computational evidences	t : transporter	7 : Outer membrane protein	5.5 : Adaptation to stress ;						no	16414958		15.10 : Adaptations to atypical conditions ;
CmetNA4v1_10123	CDS	-3	149275	150561	1287	automatic/finished	no			conserved hypothetical protein	4 : Unknown function but conserved in other organisms	u : unknown	1 : Unknown							no			18 : Unknown function ;
CmetNA4v1_10124	CDS	-2	150614	151981	1368	automatic/finished	no			putative lipoprotein	3 : Putative function from multiple computational evidences	lp : lipoprotein	1 : Unknown							no
CmetNA4v1_10125	CDS	-2	152210	153109	900	automatic/finished	no			conserved hypothetical protein; putative exported protein	4 : Unknown function but conserved in other organisms	u : unknown	1 : Unknown							no			18 : Unknown function ;
CmetNA4v1_10126	CDS	-2	153317	154258	942	automatic/finished	no			putative TRANSCRIPTIONal REGULATOR, TetR family	3 : Putative function from multiple computational evidences	r : regulator	2 : Cytoplasmic	3.1.2 : Transcriptional level ;						no			12.1 : DNA interactions ;
CmetNA4v1_10127	CDS	-1	154461	156056	1596	automatic/finished	no			putative FAD flavoprotein oxidoreductase, GMC family Oxidoreductase	3 : Putative function from multiple computational evidences	e : enzyme	1 : Unknown	1.4 : Energy production/transport ;						no			6.5 : Electron transport ;
CmetNA4v1_10128	CDS	-2	156065	156646	582	automatic/finished	no			conserved hypothetical protein; putative exported protein; putative outer membrane anchored protein	4 : Unknown function but conserved in other organisms	u : unknown	1 : Unknown							no			18 : Unknown function ;
CmetNA4v1_10129	CDS		157000	158565	1566	automatic/finished	no	adhF		Cyclohexanone monooxygenase, Flavin-containing monooxygenase (FMO)	2b : Function from indirect experimental evidences (e.g. phenotypes)	e : enzyme	2 : Cytoplasmic	1 : Metabolism ;	1.14.13.22	CYCLOHEXANONE-MONOOXYGENASE-RXN				no	12172614		18.1 : Enzymes of unknown specificity ;
CmetNA4v1_10130	CDS		158643	159533	891	automatic/finished	no			putative Short-chain dehydrogenase/reductase SDR precursor	3 : Putative function from multiple computational evidences	e : enzyme	1 : Unknown	1.4 : Energy production/transport ;	1.1.1.-					no			6.5 : Electron transport ;
CmetNA4v1_10131	CDS		159530	160531	1002	automatic/finished	no			putative enzyme, Alpha/beta hydrolase fold	3 : Putative function from multiple computational evidences	e : enzyme	1 : Unknown							no
CmetNA4v1_10132	CDS		160528	161400	873	automatic/finished	no			conserved hypothetical protein, putative membrane protein	4 : Unknown function but conserved in other organisms	u : unknown	1 : Unknown							no			18 : Unknown function ;
CmetNA4v1_10133	CDS	-2	161447	162286	840	automatic/finished	no			putative TRANSCRIPTIONal REGULATOR, MerR family	3 : Putative function from multiple computational evidences	r : regulator	2 : Cytoplasmic	3.1.2 : Transcriptional level ;						no			12.1 : DNA interactions ;
CmetNA4v1_10134	CDS		162346	163284	939	automatic/finished	no			putative transcriptional Regulator, LysR family	3 : Putative function from multiple computational evidences	r : regulator	2 : Cytoplasmic	3.1.2 : Transcriptional level ;						no			12.1 : DNA interactions ;
CmetNA4v1_10135	CDS		163448	164419	972	automatic/finished	no			conserved hypothetical protein, UPF0065	4 : Unknown function but conserved in other organisms	u : unknown	9 : Periplasmic							no	12562821		18 : Unknown function ;
CmetNA4v1_10136	CDS		164437	165411	975	automatic/finished	no			putative Succinylglutamate desuccinylase/aspartoacylase	3 : Putative function from multiple computational evidences	e : enzyme	1 : Unknown	1.1.3 : Amino acids ;	3.5.1.15	ASPARTOACYLASE-RXN				no			6.2 : Amino acids and amines ;
CmetNA4v1_10137	CDS	-1	165534	166133	600	automatic/finished	no			putative lipoprotein	3 : Putative function from multiple computational evidences	lp : lipoprotein	1 : Unknown							no
CmetNA4v1_10138	CDS	-1	166314	166880	567	automatic/finished	no			conserved hypothetical protein	4 : Unknown function but conserved in other organisms	u : unknown	1 : Unknown							no			18 : Unknown function ;
CmetNA4v1_10139	CDS	-2	166940	167536	597	automatic/finished	no			Transcriptional regulator, TetR-family										no
CmetNA4v1_10140	CDS	-2	167549	168139	591	automatic/finished	no			conserved protein of unknown function	4 : Unknown function but conserved in other organisms	u : unknown	1 : Unknown							no
CmetNA4v1_10141	CDS	-1	168186	169613	1428	automatic/finished	no	mnmE	trmE, thdF	GTPase involved in tRNA modification and in thiophene and furan oxidation	2a : Function from experimental evidences in other organisms	e : enzyme	2 : Cytoplasmic	2.2.3 : RNA modification ; 5.6.2 : Detoxification (xenobiotic metabolism) ;						no			9.4 : RNA processing ; 10.3 : tRNA and rRNA base modification ; 15.5 : Detoxification ;
CmetNA4v1_10142	CDS	-3	169666	170427	762	automatic/finished	no			conserved hypothetical protein; putative exported protein	4 : Unknown function but conserved in other organisms	u : unknown	1 : Unknown							no			18 : Unknown function ;
CmetNA4v1_10143	CDS	-2	170534	171304	771	automatic/finished	no	tam	yneD	trans-aconitate methyltransferase	2a : Function from experimental evidences in other organisms	e : enzyme	2 : Cytoplasmic	1.7.1 : Unassigned reversible reactions ; 7.1 : Cytoplasm ;	2.1.1.144	RXN0-2441				no			5 : Central intermediary metabolism ;
CmetNA4v1_10144	CDS	-1	171438	173105	1668	automatic/finished	no	yidC		preprotein translocase, cooperates with SecYEG and SecDFyajC translocon, membrane component	2a : Function from experimental evidences in other organisms	t : transporter	5 : Inner membrane protein	4.2.A.9 : The Cytochrome oxidase biogenesis (Oxa1) Family ; 6.1 : Membrane ; 7.3 : Inner membrane ;						no			7 : Transport and binding proteins ;
CmetNA4v1_10145	CDS	-3	173128	173418	291	automatic/finished	no			conserved hypothetical protein, DUF37	4 : Unknown function but conserved in other organisms	u : unknown	1 : Unknown							no			18 : Unknown function ;
CmetNA4v1_10146	CDS	-1	173427	173774	348	automatic/finished	no			Ribonuclease P protein component (RNaseP protein) (RNase P protein) (Protein C5) (fragment)					3.1.26.5	3.1.26.5-RXN$RXN0-6480	PWY0-1479			no
CmetNA4v1_10147	CDS		174998	176737	1740	automatic/finished	no	dnaA	RS01823	chromosomal replication initiator protein DnaA, DNA-binding transcriptional dual regulator	2a : Function from experimental evidences in other organisms	f : factor	2 : Cytoplasmic							no	10749858
CmetNA4v1_10148	CDS		177114	178229	1116	automatic/finished	no	dnaN		DNA polymerase III, beta-subunit	2a : Function from experimental evidences in other organisms	e : enzyme	2 : Cytoplasmic	2.1.1 : DNA replication ; 7.1 : Cytoplasm ;	2.7.7.7	DNA-DIRECTED-DNA-POLYMERASE-RXN				no	1575709		8.1 : DNA replication, recombination, and repair ;
CmetNA4v1_10149	CDS		178415	180940	2526	automatic/finished	no	gyrB	hisU, Cou, acrB, himB	DNA gyrase, subunit B (type II topoisomerase)	2a : Function from experimental evidences in other organisms	e : enzyme	2 : Cytoplasmic	2.1.1 : DNA replication ; 2.2.2 : Transcription related ; 3.1.1.1 : DNA bending, supercoiling, inversion ; 7.1 : Cytoplasm ;	5.99.1.3	5.99.1.3-RXN				no	2174443		8.1 : DNA replication, recombination, and repair ; 9 : Transcription ; 12 : Regulatory functions ;
CmetNA4v1_20001	CDS		181639	182082	444	automatic/finished	no			protein of unknown function	5 : Unknown function	u : unknown	1 : Unknown							no
CmetNA4v1_20002	CDS		182063	184042	1980	automatic/finished	no			putative Integrase catalytic region	3 : Putative function from multiple computational evidences									no
CmetNA4v1_20003	CDS		184107	185120	1014	automatic/finished	no			conserved protein of unknown function	4 : Unknown function but conserved in other organisms	u : unknown	1 : Unknown							no
CmetNA4v1_20004	CDS		186107	187525	1419	automatic/finished	no			protein of unknown function	5 : Unknown function	u : unknown	1 : Unknown							no
CmetNA4v1_20005	CDS	-2	186323	186565	243	automatic/finished	no			protein of unknown function	5 : Unknown function	u : unknown	1 : Unknown							no
CmetNA4v1_20006	CDS	-1	187557	188180	624	automatic/finished	no			Hydrolase of HAD-superfamily										no
CmetNA4v1_20007	CDS		188001	188267	267	automatic/finished	no			protein of unknown function	5 : Unknown function	u : unknown	1 : Unknown							no
CmetNA4v1_20008	CDS	-2	188348	188665	318	automatic/finished	no			protein of unknown function	5 : Unknown function	u : unknown	1 : Unknown							no
CmetNA4v1_20009	CDS		189066	189446	381	automatic/finished	no			conserved protein of unknown function	4 : Unknown function but conserved in other organisms	u : unknown	1 : Unknown							no
CmetNA4v1_20010	CDS	-1	189630	190757	1128	automatic/finished	no			conserved protein of unknown function	4 : Unknown function but conserved in other organisms	u : unknown	1 : Unknown							no
CmetNA4v1_20011	CDS		191097	194537	3441	automatic/finished	no			conserved protein of unknown function	4 : Unknown function but conserved in other organisms	u : unknown	1 : Unknown							no
CmetNA4v1_20012	CDS		194534	195250	717	automatic/finished	no			protein of unknown function	5 : Unknown function	u : unknown	1 : Unknown							no
CmetNA4v1_20013	CDS	-1	195210	195662	453	automatic/finished	no			protein of unknown function	5 : Unknown function	u : unknown	1 : Unknown							no
CmetNA4v1_20014	CDS	-1	195696	196577	882	automatic/finished	no	repB		RepB plasmid partition										no
CmetNA4v1_20015	CDS		196248	196562	315	automatic/finished	no			protein of unknown function	5 : Unknown function	u : unknown	1 : Unknown							no
CmetNA4v1_20016	CDS	-2	196574	197476	903	automatic/finished	no			ParB-like partition protein										no
CmetNA4v1_20017	CDS	-3	197473	199038	1566	automatic/finished	no			Recombinase						RXN0-5100				no
CmetNA4v1_20018	CDS		199600	199689	90	automatic/finished	no			protein of unknown function	5 : Unknown function	u : unknown	1 : Unknown							no
CmetNA4v1_20019	CDS		200786	202024	1239	automatic/finished	no			conserved protein of unknown function	4 : Unknown function but conserved in other organisms	u : unknown	1 : Unknown							no
CmetNA4v1_20020	CDS	-2	202292	204046	1755	automatic/finished	no			putative metal-dependent amidohydrolase (TAT secreted)	3 : Putative function from multiple computational evidences									no
CmetNA4v1_20021	CDS	-2	204185	205114	930	automatic/finished	no			Transmembrane transport protein										no
CmetNA4v1_20022	CDS	-2	205220	206038	819	automatic/finished	no			Transcriptional regulator, araC family										no
CmetNA4v1_20023	CDS	-1	206076	206963	888	automatic/finished	no			Binding-protein-dependent transport systems inner membrane component										no
CmetNA4v1_20024	CDS	-3	206965	207897	933	automatic/finished	no			Binding-protein-dependent transport systems inner membrane component										no
CmetNA4v1_20025	CDS	-1	207894	208931	1038	automatic/finished	no	ugpC		sn-glycerol-3-phosphate import ATP-binding protein UgpC					3.6.3.20	3.6.3.20-RXN				no
CmetNA4v1_20026	CDS	-3	208951	210345	1395	automatic/finished	no			putative sugar uptake ABC transporter	3 : Putative function from multiple computational evidences									no
CmetNA4v1_20027	CDS	-1	210543	211202	660	automatic/finished	no			Putative isoprenylcysteine carboxyl methyltransferase transmembrane protein	3 : Putative function from multiple computational evidences	e : enzyme	11 : Membrane	2.3.3 : Posttranslational modification ;						no			11.2 : Protein modification and repair ;
CmetNA4v1_20028	CDS		211321	211677	357	automatic/finished	no			conserved hypothetical protein	4 : Unknown function but conserved in other organisms	u : unknown	1 : Unknown							no			18 : Unknown function ;
CmetNA4v1_20029	CDS		211809	212759	951	automatic/finished	no			conserved hypothetical protein, DUF72; putative exported protein	4 : Unknown function but conserved in other organisms	u : unknown	1 : Unknown							no			18 : Unknown function ;
CmetNA4v1_20030	CDS		212773	213456	684	automatic/finished	no	dbpA		ATP-dependent RNA helicase, specific for 23S rRNA					3.6.1.-	RXN-11109				no
CmetNA4v1_20031	CDS		213646	214086	441	automatic/finished	no			conserved hypothetical protein, CBS domain	4 : Unknown function but conserved in other organisms	u : unknown	1 : Unknown							no			18 : Unknown function ;
CmetNA4v1_20032	CDS		214294	215880	1587	automatic/finished	no			putative transporter, MSF family; putative Drug resistance transporter EmrB/QacA subfamily	3 : Putative function from multiple computational evidences	t : transporter	11 : Membrane	4.2.A.1 : The Major Facilitator Superfamily (MFS) ;						no			7 : Transport and binding proteins ;
CmetNA4v1_20033	CDS		215991	216617	627	automatic/finished	no			putative glutathione peroxydase	3 : Putative function from multiple computational evidences	e : enzyme	9 : Periplasmic	5.5.6 : Other stresses (mechanical, nutritional, oxidative) ;	1.11.1.9	GLUTATHIONE-PEROXIDASE-RXN	PWY-4081			no			15.10 : Adaptations to atypical conditions ;
CmetNA4v1_20034	CDS		216769	217551	783	automatic/finished	no			putative beta-lactamase-like protein	3 : Putative function from multiple computational evidences									no
CmetNA4v1_20035	CDS		217617	218483	867	automatic/finished	no			4-hydroxyphenylacetate degradation bifunctional protein: 2-hydroxyhepta-2,4-diene-1,7-dioate isomerase ; 5-carboxymethyl-2-oxo-hex-3-ene-1,7-dioate decarboxylase	2a : Function from experimental evidences in other organisms	e : enzyme	2 : Cytoplasmic	1.5.1.14 : Tyrosine ; 1.1.3.15 : Phenylalanine, tyrosine degradation ;	5.3.3.10, 4.1.1.68	5.3.3.10-RXN$CARBOXY-OXOHEPT-ENEDIOATE-DECARBOXY-RXN$4.1.1.68-RXN				no	8550403		1.1 : Aromatic amino acid family ; 6.2 : Amino acids and amines ;
CmetNA4v1_20036	CDS		218716	219993	1278	automatic/finished	no			putative HIPPURATE HYDROLASE	3 : Putative function from multiple computational evidences	e : enzyme	2 : Cytoplasmic	1.5.1.13 : Phenylalanine ; 1.1.3.15 : Phenylalanine, tyrosine degradation ;	3.5.1.32	HIPPURATE-HYDROLASE-RXN				no			1.1 : Aromatic amino acid family ; 6.2 : Amino acids and amines ;
CmetNA4v1_20037	CDS	-3	220009	220827	819	automatic/finished	no			putative transcriptional regulator, Arac family	3 : Putative function from multiple computational evidences	r : regulator	2 : Cytoplasmic	3.1.2 : Transcriptional level ;						no			12.1 : DNA interactions ;
CmetNA4v1_20038	CDS		220953	222182	1230	automatic/finished	no	fsr		fosmidomycin/multidrug transporter, MFS family	2a : Function from experimental evidences in other organisms	t : transporter	5 : Inner membrane protein	4.2.A.1 : The Major Facilitator Superfamily (MFS) ; 5.6.4 : Drug resistance/sensitivity ; 6.1 : Membrane ; 7.3 : Inner membrane ;						no			7 : Transport and binding proteins ; 15.8 : Toxin production and resistance ;
CmetNA4v1_20039	CDS	-2	222245	223561	1317	automatic/finished	no	cpg		Carboxypeptidase G2					3.4.17.11	3.4.17.11-RXN				no
CmetNA4v1_20040	CDS		223782	224045	264	automatic/finished	no			conserved hypothetical protein	4 : Unknown function but conserved in other organisms	u : unknown	1 : Unknown							no			18 : Unknown function ;
CmetNA4v1_20041	CDS		224185	225177	993	automatic/finished	no			conserved hypothetical protein, UPF0065	4 : Unknown function but conserved in other organisms	u : unknown	9 : Periplasmic							no	12562821		18 : Unknown function ;
CmetNA4v1_20042	CDS	-2	225236	226003	768	automatic/finished	no			putative RESPONSE REGULATOR	3 : Putative function from multiple computational evidences	r : regulator	2 : Cytoplasmic	3.1.2.4.3 : Two-component regulatory systems (external signal) ;						no			13.1 : Two-component systems ;
CmetNA4v1_20043	CDS		226189	226995	807	automatic/finished	no			putative RESPONSE REGULATOR	3 : Putative function from multiple computational evidences	r : regulator	2 : Cytoplasmic	3.1.2.4.3 : Two-component regulatory systems (external signal) ;						no			13.1 : Two-component systems ;
CmetNA4v1_20044	CDS	-3	227008	228132	1125	automatic/finished	no			putative OUTER MEMBRANE PORIN	3 : Putative function from multiple computational evidences	t : transporter	7 : Outer membrane protein	4.1.B : Beta barrel porins (The Outer Membrane Porin (OMP) Functional Superfamily) ;						no			7.6 : Porins ;
CmetNA4v1_20045	CDS	-3	228553	228807	255	automatic/finished	no	minE	minB	cell division topological specificity factor, reverses MinC inhibition of FtsZ ring formation	2a : Function from experimental evidences in other organisms	cp : cell process	2 : Cytoplasmic	5.1 : Cell division ; 7.1 : Cytoplasm ;						no	12897015		15.1 : Cell division ;
CmetNA4v1_20046	CDS	-3	228823	229635	813	automatic/finished	no	minD	minB	membrane ATPase of the MinC-MinD-MinE system	2a : Function from experimental evidences in other organisms	f : factor	5 : Inner membrane protein	5.1 : Cell division ; 6.1 : Membrane ; 7.3 : Inner membrane ;						no	11248256		15.1 : Cell division ;
CmetNA4v1_20047	CDS	-3	229684	230532	849	automatic/finished	no	minC	minB	cell division inhibitor, inhibits FtsZ ring formation	2a : Function from experimental evidences in other organisms	cp : cell process	2 : Cytoplasmic	5.1 : Cell division ; 7.1 : Cytoplasm ;						no	10869074		15.1 : Cell division ;
CmetNA4v1_20048	CDS		230731	231702	972	automatic/finished	no			putative Mg2 transporter protein, CorA-like	3 : Putative function from multiple computational evidences	t : transporter	11 : Membrane	4.S.121 : Mg2ﳘ뛻 ;						no			7.4 : Cations and iron carrying compounds ;
CmetNA4v1_20049	CDS		231926	232087	162	automatic/finished	no			conserved exported protein of unknown function	4 : Unknown function but conserved in other organisms	u : unknown	1 : Unknown							no
CmetNA4v1_20050	CDS		232176	234008	1833	automatic/finished	no	kdpA	kac	P-type ATPase, high-affinity potassium transport system, A chain	2a : Function from experimental evidences in other organisms	t : transporter	5 : Inner membrane protein	4.3.A.3 : The P-type ATPase (P-ATPase) Superfamily ; 6.1 : Membrane ; 7.3 : Inner membrane ;						no	9858692		7 : Transport and binding proteins ;
CmetNA4v1_20051	CDS		234027	236258	2232	automatic/finished	no	kdpB	kac	P-type ATPase, high-affinity potassium transport system, B chain	2a : Function from experimental evidences in other organisms	t : transporter	5 : Inner membrane protein	4.3.A.3 : The P-type ATPase (P-ATPase) Superfamily ; 6.1 : Membrane ; 7.3 : Inner membrane ;						no	9858692		7 : Transport and binding proteins ;
CmetNA4v1_20052	CDS		236280	236891	612	automatic/finished	no	kdpC	kac	P-type ATPase, high-affinity potassium transport system, C chain	2a : Function from experimental evidences in other organisms	t : transporter	5 : Inner membrane protein	4.3.A.3 : The P-type ATPase (P-ATPase) Superfamily ; 6.1 : Membrane ; 7.3 : Inner membrane ;						no	9858692		7 : Transport and binding proteins ;
CmetNA4v1_20053	CDS		236897	237100	204	automatic/finished	no			exported protein of unknown function	5 : Unknown function	u : unknown	1 : Unknown							no
CmetNA4v1_20054	CDS		237040	239943	2904	automatic/finished	no	kdpD	kac	sensor histidine kinase in two-component regulatory system wtih KdpE, regulation of potassium translocation	2a : Function from experimental evidences in other organisms	r : regulator	5 : Inner membrane protein	2.3.3 : Posttranslational modification ; 3.1.2.4.3 : Two-component regulatory systems (external signal) ; 3.1.3.2 : Covalent modification, demodification, maturation ; 6.1 : Membrane ; 7.3 : Inner membrane ;						no	9858692		11.2 : Protein modification and repair ; 12.3 : Protein interactions ; 13.1 : Two-component systems ;
CmetNA4v1_20055	CDS		239945	240640	696	automatic/finished	no	kdpE		response regulator (OmpR family) in two-component regulatory system with KdpD, regulation of potassium translocation	2a : Function from experimental evidences in other organisms	r : regulator	2 : Cytoplasmic	2.2.2 : Transcription related ; 3.1.2.2 : Activator ; 3.1.2.4.3 : Two-component regulatory systems (external signal) ; 3.3.1 : Operon (regulation of one operon) ; 7.1 : Cytoplasm ;						no	9858692		9 : Transcription ; 12.1 : DNA interactions ; 13.1 : Two-component systems ;
CmetNA4v1_20056	CDS		240779	241489	711	automatic/finished	no			conserved hypothetical protein, tetratricopeptide repeats; putative exported protein	4 : Unknown function but conserved in other organisms	u : unknown	1 : Unknown							no			18 : Unknown function ;
CmetNA4v1_20057	CDS		241567	244215	2649	automatic/finished	no			conserved protein of unknown function	4 : Unknown function but conserved in other organisms	u : unknown	1 : Unknown							no
CmetNA4v1_20058	CDS		244212	245114	903	automatic/finished	no			conserved protein of unknown function	4 : Unknown function but conserved in other organisms	u : unknown	1 : Unknown							no
CmetNA4v1_20059	CDS	-2	245186	246640	1455	automatic/finished	no	gatB	RS01877	Aspartyl/glutamyl-tRNA(Asn/Gln) amidotransferase subunit B (Asp/Glu-ADT subunit B)	2b : Function from indirect experimental evidences (e.g. phenotypes)	e : enzyme	2 : Cytoplasmic	2.2.5 : tRNA ;	6.3.5.-					no			10 : Protein synthesis ;
CmetNA4v1_20060	CDS	-1	246720	247790	1071	automatic/finished	no			putative enzyme, Dienelactone hydrolase family	3 : Putative function from multiple computational evidences	e : enzyme	1 : Unknown							no
CmetNA4v1_20061	CDS	-1	247824	248297	474	automatic/finished	no			putative lipoprotein; putative membrane protein	3 : Putative function from multiple computational evidences	lp : lipoprotein	1 : Unknown							no
CmetNA4v1_20062	CDS	-3	248305	249804	1500	automatic/finished	no	gatA	RS01880	Glutamyl-tRNA(Gln) amidotransferase subunit A (Glu-ADT subunit A)	2b : Function from indirect experimental evidences (e.g. phenotypes)	e : enzyme	2 : Cytoplasmic	2.2.5 : tRNA ;	6.3.5.-					no			10 : Protein synthesis ;
CmetNA4v1_20063	CDS	-3	249856	250155	300	automatic/finished	no	gatC	RS01881	Glutamyl-tRNA(Gln) amidotransferase subunit C (Glu-ADT subunit C)	2b : Function from indirect experimental evidences (e.g. phenotypes)	e : enzyme	2 : Cytoplasmic	2.2.5 : tRNA ;	6.3.5.-					no			10 : Protein synthesis ;
CmetNA4v1_20064	CDS		251121	252164	1044	automatic/finished	no	mreB	envB, mon, rodY	cell wall structural complex MreBCD, actin-like component MreB	2a : Function from experimental evidences in other organisms	s : structure	1 : Unknown	5.1 : Cell division ; 5.6.4 : Drug resistance/sensitivity ;						no	14517265, 17276920		15.1 : Cell division ; 15.8 : Toxin production and resistance ;
CmetNA4v1_20065	CDS		252307	253317	1011	automatic/finished	no	mreC		cell wall structural complex MreBCD, actin-like component MreC	2a : Function from experimental evidences in other organisms	s : structure	1 : Unknown	1.6.7 : Peptidoglycan (murein) ; 6.2 : Peptidoglycan (murein) ;						no	17276920, 2687239		14.2 : Biosynthesis and degradation of murein sacculus and peptidoglycan ;
CmetNA4v1_20066	CDS		253314	253826	513	automatic/finished	no	mreD	RS01884	cell wall structural complex MreBCD transmembrane component MreD	2a : Function from experimental evidences in other organisms	s : structure	5 : Inner membrane protein	5.1 : Cell division ;						no	17276920, 2687239		15.1 : Cell division ;
CmetNA4v1_20067	CDS		253870	256251	2382	automatic/finished	no	mrdA	pbpA	Peptidoglycan glycosyltransferase (penicillin-binding protein 2)	2a : Function from experimental evidences in other organisms	e : enzyme	5 : Inner membrane protein	1.6.7 : Peptidoglycan (murein) ; 5.1 : Cell division ; 5.6.4 : Drug resistance/sensitivity ; 6.2 : Peptidoglycan (murein) ; 7.3 : Inner membrane ;	2.4.1.129	RXN0-3461				no	2644207		14.2 : Biosynthesis and degradation of murein sacculus and peptidoglycan ; 15.1 : Cell division ; 15.8 : Toxin production and resistance ;
CmetNA4v1_20068	CDS		256265	257407	1143	automatic/finished	no	mrdB	rodA	cell wall shape-determining protein	2a : Function from experimental evidences in other organisms	cp : cell process	5 : Inner membrane protein	4.9.B.3 : The Putative Bacterial Murein Precursor Exporter (MPE) Family ; 5.1 : Cell division ; 6.1 : Membrane ; 7.3 : Inner membrane ;						no	2254246		7 : Transport and binding proteins ; 15.1 : Cell division ;
CmetNA4v1_20069	CDS		257460	258131	672	automatic/finished	no			conserved hypothetical protein, DUF484	4 : Unknown function but conserved in other organisms	u : unknown	1 : Unknown							no			18 : Unknown function ;
CmetNA4v1_20070	CDS		258151	259260	1110	automatic/finished	no	xerC		site-specific tyrosine recombinase	2a : Function from experimental evidences in other organisms	e : enzyme	1 : Unknown	2.1.3 : DNA recombination ; 5.1 : Cell division ;						no	9268326		8.1 : DNA replication, recombination, and repair ; 15.1 : Cell division ;
CmetNA4v1_20071	CDS	-1	259257	260213	957	automatic/finished	no	gcvA		transcriptional regulator of Glycine cleavage system operon, LysR family	2a : Function from experimental evidences in other organisms	r : regulator	2 : Cytoplasmic	1.1.3 : Amino acids ; 1.7.17 : Formyl-tetrahydrofolate biosynthesis ; 2.2.2 : Transcription related ; 3.1.2.2 : Activator ; 3.1.2.3 : Repressor ; 3.3.1 : Operon (regulation of one operon) ; 7.1 : Cytoplasm ;						no	11495998		4.2 : Folic acid ; 6.2 : Amino acids and amines ; 9 : Transcription ; 12.1 : DNA interactions ;
CmetNA4v1_20072	CDS		260407	260775	369	automatic/finished	no			conserved hypothetical protein	4 : Unknown function but conserved in other organisms	u : unknown	1 : Unknown							no			18 : Unknown function ;
CmetNA4v1_20073	CDS		260848	261642	795	automatic/finished	no	lipB	RS03290	Lipoyltransferase (Lipoyl-[acyl-carrier protein]-protein- N-lipoyltransferase) (Lipoate-protein ligase B)	2a : Function from experimental evidences in other organisms	e : enzyme	2 : Cytoplasmic	1.5.3.3 : Lipoate ;	2.3.1.-	RXN0-1138$RXN0-947	PWY0-501			no	12591875, 20525439		4.4 : Lipoate ;
CmetNA4v1_20074	CDS		261719	262711	993	automatic/finished	no	lipA	lip	lipoyl/lipoate synthase, an iron-sulfur enzyme	2a : Function from experimental evidences in other organisms	e : enzyme	2 : Cytoplasmic	1.5.3.3 : Lipoate ; 7.1 : Cytoplasm ;	2.8.1.8	RXN0-949	PWY0-501			no	12591875		4.4 : Lipoate ;
CmetNA4v1_20075	CDS		263052	263702	651	automatic/finished	no			Allophanate hydrolase subunit1 (ahs1)	2a : Function from experimental evidences in other organisms	e : enzyme	2 : Cytoplasmic	1.7 : Central intermediary metabolism ;	3.5.1.54	ALLOPHANATE-HYDROLASE-RXN	PWY-5703$PWY-5169			no			5 : Central intermediary metabolism ;
CmetNA4v1_20076	CDS		263699	264718	1020	automatic/finished	no			allophanate hydrolase, subunit2 (ahs2)	2a : Function from experimental evidences in other organisms	e : enzyme	2 : Cytoplasmic	1.7 : Central intermediary metabolism ;	3.5.1.54	ALLOPHANATE-HYDROLASE-RXN	PWY-5703$PWY-5169			no			5 : Central intermediary metabolism ;
CmetNA4v1_20077	CDS		264795	265535	741	automatic/finished	no			putative lipoprotein, LamB/YcsF family protein	3 : Putative function from multiple computational evidences	lp : lipoprotein	1 : Unknown							no
CmetNA4v1_20078	CDS		265603	266337	735	automatic/finished	no			conserved hypothetical protein, DUF969; putative TRANSMEMBRANE PROTEIN	4 : Unknown function but conserved in other organisms	u : unknown	11 : Membrane							no			18 : Unknown function ;
CmetNA4v1_20079	CDS		266341	267291	951	automatic/finished	no			conserved hypothetical protein, DUF979; putative TRANSMEMBRANE PROTEIN	4 : Unknown function but conserved in other organisms	u : unknown	11 : Membrane							no			18 : Unknown function ;
CmetNA4v1_20080	CDS		267305	267973	669	automatic/finished	no	pcp	RS01434	PYRROLIDONE-CARBOXYLATE PEPTIDASE (5-OXOPROLYL-PEPTIDASE) (C15 exopeptidase)	2b : Function from indirect experimental evidences (e.g. phenotypes)	e : enzyme	1 : Unknown		3.4.19.3	PYROGLUTAMYL-PEPTIDASE-I-RXN				no
CmetNA4v1_20081	CDS	-3	267985	269307	1323	automatic/finished	no			conserved hypothetical protein; putative TRANSMEMBRANE PROTEIN	4 : Unknown function but conserved in other organisms	u : unknown	11 : Membrane							no			18 : Unknown function ;
CmetNA4v1_20082	CDS	-3	269359	270006	648	automatic/finished	no			conserved hypothetical protein	4 : Unknown function but conserved in other organisms	u : unknown	1 : Unknown							no			18 : Unknown function ;
CmetNA4v1_20083	CDS	-1	270051	270992	942	automatic/finished	no			putative ABC-type transporter, periplasmic component	3 : Putative function from multiple computational evidences	t : transporter	9 : Periplasmic	4.3.A.1.p : periplasmic binding component ;						no			7 : Transport and binding proteins ;
CmetNA4v1_20084	CDS	-2	270992	271831	840	automatic/finished	no			putative ABC transporter, ATP binding component	3 : Putative function from multiple computational evidences	t : transporter	2 : Cytoplasmic	4.3.A.1.a : ATP binding component ; 7.1 : Cytoplasm ;						no			7 : Transport and binding proteins ;
CmetNA4v1_20085	CDS	-3	271828	272958	1131	automatic/finished	no			conserved hypothetical protein, DUF140; putative TRANSMEMBRANE PROTEIN	4 : Unknown function but conserved in other organisms	u : unknown	11 : Membrane							no			18 : Unknown function ;
CmetNA4v1_20086	CDS		273119	273976	858	automatic/finished	no			BIOTIN-[ACETYL-COA-CARBOXYLASE] SYNTHETASE	2a : Function from experimental evidences in other organisms	e : enzyme	2 : Cytoplasmic	1.5.3.1 : Biotin ;	6.3.4.15	BIOTINLIG-RXN	PWY0-1264			no	1409631		4.1 : Biotin ;
CmetNA4v1_20087	CDS		273973	274806	834	automatic/finished	no			TRANSCRIPTION REGULATION ACCESSORY FACTOR, similar to B.pertussis bvg	2b : Function from indirect experimental evidences (e.g. phenotypes)	f : factor	2 : Cytoplasmic	3.1.2.4 : Complex regulation ; 5.13 : Virulence associated ;						no	7601846		13 : Signal transduction ; 15.9 : Pathogenesis ;
CmetNA4v1_20088	CDS		274849	275643	795	automatic/finished	no			conserved exported protein of unknown function	4 : Unknown function but conserved in other organisms	u : unknown	1 : Unknown							no
CmetNA4v1_20089	CDS	-3	275767	276258	492	automatic/finished	no	aut	RS03276	aut gene, putative Cytidylyltransferase	2a : Function from experimental evidences in other organisms	e : enzyme	1 : Unknown	1.3.1 : Glycolysis ;	2.7.7.-					no	8071217		6.8 : Glycolysis/gluconeogenesis ;
CmetNA4v1_20090	CDS	-1	276336	277196	861	automatic/finished	no			Putative ferritin/ribonucleotide reductase-like protein	3 : Putative function from multiple computational evidences	e : enzyme	1 : Unknown	1.4 : Energy production/transport ;						no			6.5 : Electron transport ;
CmetNA4v1_20091	CDS	-1	277326	278582	1257	automatic/finished	no			conserved hypothetical protein; putative exported protein	4 : Unknown function but conserved in other organisms	u : unknown	1 : Unknown							no			18 : Unknown function ;
CmetNA4v1_20092	CDS	-2	278579	279478	900	automatic/finished	no			conserved hypothetical protein	4 : Unknown function but conserved in other organisms	u : unknown	1 : Unknown							no			18 : Unknown function ;
CmetNA4v1_20093	CDS	-2	279533	280360	828	automatic/finished	no			putative ENOYL-COA HYDRATASE / isolerase	3 : Putative function from multiple computational evidences	e : enzyme	2 : Cytoplasmic		4.2.1.17	TIGLYLCOA-HYDROXY-RXN$RXN0-6513$ENOYL-COA-HYDRAT-RXN$RXN-11244$RXN-10705$RXN-10704$RXN-10697$RXN-7838$METHYLACYLYLCOA-HYDROXY-RXN$RXN-11667	ILEUDEG-PWY$PWY0-321$FAO-PWY$VALDEG-PWY$PWY-5177$CENTFERM-PWY			no
CmetNA4v1_20094	CDS	-2	280742	281722	981	automatic/finished	no			putative 2-keto-4-pentenoate hydratase/2-oxohepta-3-ene-1,7-dioic acid hydratase (catechol pathway): COG0179	3 : Putative function from multiple computational evidences	e : enzyme	1 : Unknown							no
CmetNA4v1_20095	CDS		281826	282683	858	automatic/finished	no			putative TRANSCRIPTIONal REGULATOR, IclR family	3 : Putative function from multiple computational evidences	r : regulator	2 : Cytoplasmic	3.1.2 : Transcriptional level ;						no			12.1 : DNA interactions ;
CmetNA4v1_20096	CDS		282643	283740	1098	automatic/finished	no			conserved hypothetical protein	4 : Unknown function but conserved in other organisms	u : unknown	1 : Unknown							no			18 : Unknown function ;
CmetNA4v1_20097	CDS		283795	284643	849	automatic/finished	no	pcaD	RS03265	B-KETOADIPATE ENOL-LACTONE HYDROLASE (putative)	2b : Function from indirect experimental evidences (e.g. phenotypes)	e : enzyme	2 : Cytoplasmic	1 : Metabolism ;	3.1.1.24	RXN-10083$3-OXOADIPATE-ENOL-LACTONASE-RXN	CATECHOL-ORTHO-CLEAVAGE-PWY$PROTOCATECHUATE-ORTHO-CLEAVAGE-PWY			no			18.1 : Enzymes of unknown specificity ;
CmetNA4v1_20098	CDS		284879	285136	258	automatic/finished	no			conserved hypothetical protein	4 : Unknown function but conserved in other organisms	u : unknown	1 : Unknown							no			18 : Unknown function ;
CmetNA4v1_20099	CDS	-1	285255	285647	393	automatic/finished	no			conserved hypothetical protein, weak Rhodanese/Cell cycle control phosphatase domain	4 : Unknown function but conserved in other organisms	u : unknown	1 : Unknown							no			18 : Unknown function ;
CmetNA4v1_20100	CDS		285871	286938	1068	automatic/finished	no	metHa	RS03262	5-METHYLTETRAHYDROFOLATE--HOMOCYSTEINE METHYLTRANSFERASE (METHIONINE SYNTHASE, VITAMIN-B12 DEPENDENT ISOZYME) PROTEIN	2a : Function from experimental evidences in other organisms	e : enzyme	2 : Cytoplasmic	1.5.1.9 : Methionine ; 1.5.3.13 : Cobalamin (Vitamin B12) ; 1.7.17 : Formyl-tetrahydrofolate biosynthesis ; 1.7.20 : S-adenosyl methionine biosynthesis ;	2.1.1.13	HOMOCYSMETB12-RXN	HOMOSER-METSYN-PWY$1CMET2-PWY$PWY-2201			no			1.2 : Aspartate family ; 4.2 : Folic acid ; 4.3 : Heme, porphyrin, and cobalamin ; 5 : Central intermediary metabolism ;
CmetNA4v1_20101	CDS		286967	289714	2748	automatic/finished	no	metHb	RS03261	5-METHYLTETRAHYDROFOLATE--HOMOCYSTEINE METHYLTRANSFERASE (METHIONINE SYNTHASE, VITAMIN-B12 DEPENDENT ISOZYME) PROTEIN	2a : Function from experimental evidences in other organisms	e : enzyme	2 : Cytoplasmic	1.5.1.9 : Methionine ; 1.5.3.13 : Cobalamin (Vitamin B12) ; 1.7.17 : Formyl-tetrahydrofolate biosynthesis ; 1.7.20 : S-adenosyl methionine biosynthesis ;	2.1.1.13	HOMOCYSMETB12-RXN	HOMOSER-METSYN-PWY$1CMET2-PWY$PWY-2201			no			1.2 : Aspartate family ; 4.2 : Folic acid ; 4.3 : Heme, porphyrin, and cobalamin ; 5 : Central intermediary metabolism ;
CmetNA4v1_20102	CDS		290020	290358	339	automatic/finished	no			conserved exported protein of unknown function	4 : Unknown function but conserved in other organisms	u : unknown	1 : Unknown							no
CmetNA4v1_20103	CDS		290608	291240	633	automatic/finished	no	vsrD	RS03259	RESPONSE REGULATOR, LuxR family	2a : Function from experimental evidences in other organisms	r : regulator	2 : Cytoplasmic	3.1.2.4.3 : Two-component regulatory systems (external signal) ; 3.1.2.4 : Complex regulation ; 5.13 : Virulence associated ;						no	11073909, 7868600		13.1 : Two-component systems ; 15.9 : Pathogenesis ;
CmetNA4v1_20104	CDS		291401	291808	408	automatic/finished	no			putative response regulator, CheY family	3 : Putative function from multiple computational evidences	r : regulator	2 : Cytoplasmic	3.1.2.4.3 : Two-component regulatory systems (external signal) ;						no			13.1 : Two-component systems ;
CmetNA4v1_20105	CDS	-3	291874	293259	1386	automatic/finished	no	vsrA	RS03256	sensor histidine kinase	2a : Function from experimental evidences in other organisms	rc : receptor	5 : Inner membrane protein	3.1.2.4.3 : Two-component regulatory systems (external signal) ; 3.1.2.4 : Complex regulation ; 5.13 : Virulence associated ;						no	11073909, 7868600		13.1 : Two-component systems ; 15.9 : Pathogenesis ;
CmetNA4v1_20106	CDS		293411	293704	294	automatic/finished	no			conserved protein of unknown function	4 : Unknown function but conserved in other organisms	u : unknown	1 : Unknown							no
CmetNA4v1_20107	CDS		293735	294169	435	automatic/finished	no			conserved hypothetical protein, DUF883	4 : Unknown function but conserved in other organisms	u : unknown	1 : Unknown							no			18 : Unknown function ;
CmetNA4v1_20108	CDS	-2	294581	294901	321	automatic/finished	no			conserved hypothetical protein	4 : Unknown function but conserved in other organisms	u : unknown	1 : Unknown							no			18 : Unknown function ;
CmetNA4v1_20109	CDS		295079	296887	1809	automatic/finished	no	argS	RS03254	ARGINYL-tRNA SYNTHETASE (ARGININE--tRNA LIGASE) PROTEIN	2a : Function from experimental evidences in other organisms	e : enzyme	2 : Cytoplasmic	2.3.1 : Amino acid-activation ;	6.1.1.19	ARGININE--TRNA-LIGASE-RXN	TRNA-CHARGING-PWY			no			10.1 : tRNA aminoacylation ;
CmetNA4v1_20110	CDS		297027	297767	741	automatic/finished	no			conserved hypothetical protein; putative exported protein	4 : Unknown function but conserved in other organisms	u : unknown	1 : Unknown							no			18 : Unknown function ;
CmetNA4v1_20111	CDS		297913	298551	639	automatic/finished	no	dsbA	RS03252	periplasmic protein disulfide isomerase I	2a : Function from experimental evidences in other organisms	e : enzyme	9 : Periplasmic	2.3.4 : Chaperoning, folding ;		DISULFOXRED-RXN				no	10711598, 12498799		11.3 : Protein folding and stabilization ;
CmetNA4v1_20112	CDS		298643	299440	798	automatic/finished	no			putative DEHYDROGENASE/REDUCTASE OXIDOREDUCTASE	3 : Putative function from multiple computational evidences	e : enzyme	1 : Unknown	1.4 : Energy production/transport ;	1.-.-.-					no			6.5 : Electron transport ;
CmetNA4v1_20113	CDS		299437	300282	846	automatic/finished	no			putative periplasmic metal binding protein	3 : Putative function from multiple computational evidences	rc : receptor	9 : Periplasmic	4.3.A.1.p : periplasmic binding component ;						no			7 : Transport and binding proteins ;
CmetNA4v1_20114	CDS	-3	300283	301362	1080	automatic/finished	no			putative enzyme, Metallo-beta-lactamase superfamily	3 : Putative function from multiple computational evidences	e : enzyme	1 : Unknown							no
CmetNA4v1_20115	CDS		301495	301929	435	automatic/finished	no			putative transcriptional regulator, MerR family	3 : Putative function from multiple computational evidences	r : regulator	2 : Cytoplasmic	3.1.2 : Transcriptional level ;						no			12.1 : DNA interactions ;
CmetNA4v1_20116	CDS	-3	301690	301893	204	automatic/finished	no			protein of unknown function	5 : Unknown function	u : unknown	1 : Unknown							no
CmetNA4v1_20117	CDS		302052	303233	1182	automatic/finished	no			putative ACYL-COA DEHYDROGENASE OXIDOREDUCTASE	3 : Putative function from multiple computational evidences	e : enzyme	1 : Unknown	1.4 : Energy production/transport ;	1.3.99.-					no			6.5 : Electron transport ;
CmetNA4v1_20118	CDS		303360	305183	1824	automatic/finished	no	aceK		isocitrate dehydrogenase kinase/phosphatase	2a : Function from experimental evidences in other organisms	e : enzyme	1 : Unknown	1.7.2 : Glyoxylate bypass ; 2.3.3 : Posttranslational modification ; 3.1.3.2 : Covalent modification, demodification, maturation ;	2.7.11.5	DEPHOSICITDEHASE-RXN$PHOSICITDEHASE-RXN				no	12193617		6.12 : TCA cycle ; 11.2 : Protein modification and repair ; 12.3 : Protein interactions ;
CmetNA4v1_20119	CDS		305180	305851	672	automatic/finished	no	can	yadF	carbonic anhydrase	2a : Function from experimental evidences in other organisms	e : enzyme	1 : Unknown	1.7 : Central intermediary metabolism ;	4.2.1.1	RXN0-5224	PWY-6142$PWYQT-4429$CYANCAT-PWY			no			5 : Central intermediary metabolism ;
CmetNA4v1_20120	CDS		305893	307077	1185	automatic/finished	no			putative acetyl-CoA acetyltransferase with thiolase domain	3 : Putative function from multiple computational evidences	e : enzyme	1 : Unknown	1.1.2.1 : Degradation of short-chain fatty acids ;	2.3.1.9	RXN-12561$ACETYL-COA-ACETYLTRANSFER-RXN$METHYLACETOACETYLCOATHIOL-RXN	PWY-5177$ACETOACETATE-DEG-PWY$CENTFERM-PWY$ILEUDEG-PWY			no			3.2 : Degradation ;
CmetNA4v1_20121	CDS		307127	307807	681	automatic/finished	no			putative Short-chain dehydrogenase/reductase	3 : Putative function from multiple computational evidences	e : enzyme	1 : Unknown	1 : Metabolism ;						no			18.1 : Enzymes of unknown specificity ;
CmetNA4v1_20122	CDS		307823	308953	1131	automatic/finished	no			putative ACYL COA DEHYDROGENASE OXIDOREDUCTASE PROTEIN	3 : Putative function from multiple computational evidences	e : enzyme	1 : Unknown	1 : Metabolism ;	1.3.99.-					no			18.1 : Enzymes of unknown specificity ;
CmetNA4v1_20123	CDS		309043	309702	660	automatic/finished	no			putative thioredoxin oxidoreductase	3 : Putative function from multiple computational evidences	e : enzyme	1 : Unknown	1 : Metabolism ;						no			18.1 : Enzymes of unknown specificity ;
CmetNA4v1_20124	CDS		309699	310382	684	automatic/finished	no			putative haloacid dehalogenase-like hydrolase	3 : Putative function from multiple computational evidences	e : enzyme	1 : Unknown	1 : Metabolism ;						no			18.1 : Enzymes of unknown specificity ;
CmetNA4v1_20125	CDS		310379	310804	426	automatic/finished	no			conserved hypothetical protein	4 : Unknown function but conserved in other organisms	u : unknown	1 : Unknown							no			18 : Unknown function ;
CmetNA4v1_20126	CDS		310865	311794	930	automatic/finished	no			putative lipoprotein	3 : Putative function from multiple computational evidences	lp : lipoprotein	1 : Unknown							no
CmetNA4v1_20127	CDS		311855	312643	789	automatic/finished	no			putative ENOYL-COA HYDRATASE PROTEIN	3 : Putative function from multiple computational evidences	e : enzyme	1 : Unknown		4.2.1.17	TIGLYLCOA-HYDROXY-RXN$RXN0-6513$ENOYL-COA-HYDRAT-RXN$RXN-11244$RXN-10705$RXN-10704$RXN-10697$RXN-7838$METHYLACYLYLCOA-HYDROXY-RXN$RXN-11667$RXN-902$RXN0-5393	ILEUDEG-PWY$PWY0-321$FAO-PWY$VALDEG-PWY$PWY-5177$CENTFERM-PWY$PWY0-1337			no
CmetNA4v1_20128	CDS		312863	314329	1467	automatic/finished	no	bioA		7,8-diaminopelargonic acid synthetase, PLP-dependent	2a : Function from experimental evidences in other organisms	e : enzyme	1 : Unknown	1.5.3.1 : Biotin ;	2.6.1.62	DAPASYN-RXN	PWY0-1507			no	14756557, 3058702		4.1 : Biotin ;
CmetNA4v1_20129	CDS		314319	315539	1221	automatic/finished	no	bioF		7-keto-8-aminopelargonic acid synthetase	2a : Function from experimental evidences in other organisms	e : enzyme	1 : Unknown	1.5.3.1 : Biotin ;	2.3.1.47	RXN-11484$7KAPSYN-RXN	PWY-6519$PWY-6578			no	3058702		4.1 : Biotin ;
CmetNA4v1_20130	CDS		315536	316300	765	automatic/finished	no	bioD		dethiobiotin synthetase	2a : Function from experimental evidences in other organisms	e : enzyme	1 : Unknown	1.5.3.1 : Biotin ;	6.3.3.3	DETHIOBIOTIN-SYN-RXN	PWY0-1507			no	3058702		4.1 : Biotin ;
CmetNA4v1_20131	CDS		316263	317378	1116	automatic/finished	no	bioB		biotin synthetase	2a : Function from experimental evidences in other organisms	e : enzyme	1 : Unknown	1.5.3.1 : Biotin ;	2.8.1.6	2.8.1.6-RXN	PWY0-1507			no	3058702		4.1 : Biotin ;
CmetNA4v1_20132	CDS		317528	318469	942	automatic/finished	no			putative 2-ketoacid reductase	3 : Putative function from multiple computational evidences	e : enzyme	2 : Cytoplasmic	1.7.21 : Glyoxylate degradation ; 7.1 : Cytoplasm ;	1.1.1.79	GLYOXYLATE-REDUCTASE-NADP+RXN				no			6 : Energy metabolism ;
CmetNA4v1_20133	CDS		318504	319001	498	automatic/finished	no			conserved hypothetical protein; YbaK/prolyl-tRNA synthetase associated region	4 : Unknown function but conserved in other organisms	u : unknown	1 : Unknown							no			18 : Unknown function ;
CmetNA4v1_20134	CDS		318998	319252	255	automatic/finished	no			conserved hypothetical protein; putative exported protein	4 : Unknown function but conserved in other organisms	u : unknown	1 : Unknown							no			18 : Unknown function ;
CmetNA4v1_20135	CDS		319249	320178	930	automatic/finished	no			putative Metallo-hydrolase/oxidoreductase, BETA LACTAMASE superfamily	3 : Putative function from multiple computational evidences	e : enzyme	1 : Unknown							no
CmetNA4v1_20136	CDS		320181	320732	552	automatic/finished	no			putative acetyltransferase	3 : Putative function from multiple computational evidences									no
CmetNA4v1_20137	CDS	-1	320787	322946	2160	automatic/finished	no			putative TonB-dependent receptor	3 : Putative function from multiple computational evidences	rc : receptor	11 : Membrane	4.2.C.1 : TonB Family of Auxiliary Proteins for Energization of OMR-mediated Transport ;						no			7 : Transport and binding proteins ;
CmetNA4v1_20138	CDS	-1	323061	323510	450	automatic/finished	no			conserved hypothetical protein	4 : Unknown function but conserved in other organisms	u : unknown	1 : Unknown							no			18 : Unknown function ;
CmetNA4v1_20139	CDS	-3	323449	324624	1176	automatic/finished	no			conserved hypothetical protein, similar to E.coli yjiA and P.chlororaphis P47K	4 : Unknown function but conserved in other organisms	u : unknown	1 : Unknown							no	14696199, 2013568		18 : Unknown function ;
CmetNA4v1_20140	CDS	-3	324817	325506	690	automatic/finished	no			conserved hypothetical protein	4 : Unknown function but conserved in other organisms	u : unknown	1 : Unknown							no			18 : Unknown function ;
CmetNA4v1_20141	CDS	-3	325825	326916	1092	automatic/finished	no			conserved hypothetical protein, similar to E.coli yjiA and P.chlororaphis P47K	4 : Unknown function but conserved in other organisms	u : unknown	1 : Unknown							no	14696199, 2013568		18 : Unknown function ;
CmetNA4v1_20142	CDS	-1	326967	327476	510	automatic/finished	no			putative transcriptional regulator, FUR family	3 : Putative function from multiple computational evidences	r : regulator	2 : Cytoplasmic	3.1.2 : Transcriptional level ;						no			12.1 : DNA interactions ;
CmetNA4v1_20143	CDS		327609	328508	900	automatic/finished	no	dehH	RS00691	Haloacetate dehalogenase	2b : Function from indirect experimental evidences (e.g. phenotypes)	e : enzyme	1 : Unknown	1.1 : Carbon compound utilization ;	3.8.1.3	RXN-11761$HALOACETATE-DEHALOGENASE-RXN	PWY-6646			no	1512562		6 : Energy metabolism ;
CmetNA4v1_20144	CDS		328760	329746	987	automatic/finished	no			conserved hypothetical protein, UPF0065	4 : Unknown function but conserved in other organisms	u : unknown	9 : Periplasmic							no	12562821		18 : Unknown function ;
CmetNA4v1_20145	CDS		329942	330478	537	automatic/finished	no	hslV	htpO, clpQ, yiiC	peptidase component of the HslUV protease	2a : Function from experimental evidences in other organisms	e : enzyme	2 : Cytoplasmic	1.2.3 : Proteins/peptides/glycopeptides ; 2.3.4 : Chaperoning, folding ; 2.3.6 : Turnover, degradation ; 3.1.3.4 : Proteases, cleavage of compounds ; 5.1 : Cell division ; 7.1 : Cytoplasm ;	3.4.25.-					no	10693812		11.3 : Protein folding and stabilization ; 11.4 : Degradation of proteins, peptides, and glycopeptides ; 12.3 : Protein interactions ; 15.1 : Cell division ;
CmetNA4v1_20146	CDS		330497	331828	1332	automatic/finished	no	hslU	htpI, clpY	ATPase component of the HslUV protease, molecular chaperone	2a : Function from experimental evidences in other organisms	e : enzyme	2 : Cytoplasmic	2.3.4 : Chaperoning, folding ; 2.3.6 : Turnover, degradation ; 3.1.3.4 : Proteases, cleavage of compounds ; 5.1 : Cell division ; 5.5.2 : Temperature extremes ; 7.1 : Cytoplasm ;						no	10693812		11.3 : Protein folding and stabilization ; 11.4 : Degradation of proteins, peptides, and glycopeptides ; 12.3 : Protein interactions ; 15.1 : Cell division ;
CmetNA4v1_20147	CDS	-3	331906	332433	528	automatic/finished	no			conserved exported protein of unknown function	4 : Unknown function but conserved in other organisms	u : unknown	1 : Unknown							no
CmetNA4v1_20148	CDS		332681	333046	366	automatic/finished	no			conserved exported protein of unknown function	4 : Unknown function but conserved in other organisms	u : unknown	1 : Unknown							no
CmetNA4v1_20149	CDS	-3	333088	333681	594	automatic/finished	no			putative response regulator, RegA/PrrA/ActR family (CheY-like receiver domain Fis-type HTH domain)	3 : Putative function from multiple computational evidences	r : regulator	2 : Cytoplasmic	3.1.2.4.3 : Two-component regulatory systems (external signal) ;						no			13.1 : Two-component systems ;
CmetNA4v1_20150	CDS	-1	333681	335060	1380	automatic/finished	no			putative sensor histidine kinase	3 : Putative function from multiple computational evidences	rc : receptor	5 : Inner membrane protein	3.1.2.4.3 : Two-component regulatory systems (external signal) ;						no			13.1 : Two-component systems ;
CmetNA4v1_20151	CDS		335242	335730	489	automatic/finished	no			conserved hypothetical protein, DUF461; putative TRANSMEMBRANE PROTEIN	4 : Unknown function but conserved in other organisms	u : unknown	1 : Unknown							no			18 : Unknown function ;
CmetNA4v1_20152	CDS	-2	335816	336751	936	automatic/finished	no			putative transcriptional regulator, LysR family	3 : Putative function from multiple computational evidences	r : regulator	2 : Cytoplasmic	3.1.2 : Transcriptional level ;						no			12.1 : DNA interactions ;
CmetNA4v1_20153	CDS	-2	336806	337036	231	automatic/finished	no			conserved hypothetical protein	4 : Unknown function but conserved in other organisms	u : unknown	1 : Unknown							no			18 : Unknown function ;
CmetNA4v1_20154	CDS		337246	338163	918	automatic/finished	no	argB	RS01856	ACETYLGLUTAMATE KINASE (putative precursor)	2a : Function from experimental evidences in other organisms	e : enzyme	2 : Cytoplasmic	1.5.1.3 : Arginine ;	2.7.2.8	ACETYLGLUTKIN-RXN	ARGSYNBSUB-PWY$ARGSYN-PWY$GLUTORN-PWY			no			1.3 : Glutamate family ;
CmetNA4v1_20155	CDS		338228	339232	1005	automatic/finished	no			conserved hypothetical protein	4 : Unknown function but conserved in other organisms	u : unknown	1 : Unknown							no			18 : Unknown function ;
CmetNA4v1_20156	CDS		339229	339879	651	automatic/finished	no			putative transcriptional regulator of dUTPase subunit (TetR/AcrR family); similar to E.coli ttk	3 : Putative function from multiple computational evidences	r : regulator	2 : Cytoplasmic	2.2.2 : Transcription related ; 3.1.2.2 : Activator ; 3.1.2.3 : Repressor ; 4.9.B : Putative uncharacterized transport protein ; 3.1.2 : Transcriptional level ;						no			7 : Transport and binding proteins ; 9 : Transcription ; 12.1 : DNA interactions ;
CmetNA4v1_20157	CDS		339938	340153	216	automatic/finished	no			protein of unknown function	5 : Unknown function	u : unknown	1 : Unknown							no
CmetNA4v1_20158	CDS		340150	341322	1173	automatic/finished	no	metX	RS01850	HOMOSERINE O-ACETYLTRANSFERASE PROTEIN	2b : Function from indirect experimental evidences (e.g. phenotypes)	e : enzyme	2 : Cytoplasmic	1.5.1.9 : Methionine ; 1.5.1 : Amino acids ; 1.8.2 : Sulfur metabolism ;	2.3.1.31	HOMOSERINE-O-ACETYLTRANSFERASE-RXN	PWY-5344			no			1.2 : Aspartate family ; 5.5 : Sulfur metabolism ;
CmetNA4v1_20159	CDS		341319	341930	612	automatic/finished	no	metW		S-adenosyl-L-methionine-dependent methyltransferase	2a : Function from experimental evidences in other organisms	e : enzyme	2 : Cytoplasmic	1.5.1.9 : Methionine ;	2.1.1.-					no	11479715		1.2 : Aspartate family ;
CmetNA4v1_20160	CDS		342023	342841	819	automatic/finished	no			conserved hypothetical protein	4 : Unknown function but conserved in other organisms	u : unknown	1 : Unknown							no			18 : Unknown function ;
CmetNA4v1_20161	CDS	-1	342843	344123	1281	automatic/finished	no	ampG		muropeptide transport protein (MFS family)	2a : Function from experimental evidences in other organisms	t : transporter	5 : Inner membrane protein	1.7.34 : Peptidoglycan (murein) turnover, recycling ; 4.2.A.1 : The Major Facilitator Superfamily (MFS) ; 6.1 : Membrane ; 6.2 : Peptidoglycan (murein) ; 7.3 : Inner membrane ;						no	12426329		7 : Transport and binding proteins ; 14.2 : Biosynthesis and degradation of murein sacculus and peptidoglycan ;
CmetNA4v1_20162	CDS		344219	345196	978	automatic/finished	no			putative membrane-associated zinc metalloprotease, Peptidase M48, Ste24p	3 : Putative function from multiple computational evidences	e : enzyme	1 : Unknown							no
CmetNA4v1_20163	CDS	-1	345270	346217	948	automatic/finished	no	argC	RS01012	N-ACETYL-GAMMA-GLUTAMYL-PHOSPHATE REDUCTASE (N- acetyl-glutamate semialdehyde dehydrogenase) (NAGSA dehydrogenase)	2a : Function from experimental evidences in other organisms	e : enzyme	2 : Cytoplasmic	1.5.1 : Amino acids ; 1.5.1.3 : Arginine ;	1.2.1.38	N-ACETYLGLUTPREDUCT-RXN	ARGSYNBSUB-PWY$ARGSYN-PWY$GLUTORN-PWY			no	7929012		1.3 : Glutamate family ;
CmetNA4v1_20164	CDS	-1	346443	347219	777	automatic/finished	no			putative EXODEOXYRIBONUCLEASE III/endonuclease/phosphatase	3 : Putative function from multiple computational evidences	e : enzyme	2 : Cytoplasmic	5 : Cell processes ;	3.1.11.2, 4.2.99.18	4.2.99.18-RXN$RXN0-2601$3.1.11.2-RXN				no			15 : Cellular processes ;
CmetNA4v1_20165	CDS		347250	347927	678	automatic/finished	no	pyrE		orotate phosphoribosyltransferase	2a : Function from experimental evidences in other organisms	e : enzyme	2 : Cytoplasmic	1.5.2.2 : Pyrimidine biosynthesis ; 7.1 : Cytoplasm ;	2.4.2.10	OROPRIBTRANS-RXN	PWY-5686			no	8620002		2.4 : Pyrimidine ribonucleotide biosynthesis ;
CmetNA4v1_20166	CDS		347975	349303	1329	automatic/finished	no			putative Patatin-like phospholipase	3 : Putative function from multiple computational evidences	e : enzyme	1 : Unknown	1 : Metabolism ; 6.1 : Membrane ;						no			18.1 : Enzymes of unknown specificity ;
CmetNA4v1_20167	CDS	-2	349328	350137	810	automatic/finished	no			conserved hypothetical protein; putative polyphosphate kinase	4 : Unknown function but conserved in other organisms	u : unknown	1 : Unknown							no			18 : Unknown function ;
CmetNA4v1_20168	CDS	-1	350193	351059	867	automatic/finished	no	dapF		diaminopimelate epimerase	2a : Function from experimental evidences in other organisms	e : enzyme	2 : Cytoplasmic	1.5.1.7 : Lysine, diaminopimelate ; 7.1 : Cytoplasm ;	5.1.1.7	DIAMINOPIMEPIM-RXN	DAPLYSINESYN-PWY			no			1.2 : Aspartate family ;
CmetNA4v1_20169	CDS	-2	351074	351967	894	automatic/finished	no			putative lipid A biosynthesis acyltransferase	3 : Putative function from multiple computational evidences	e : enzyme	1 : Unknown	1.6 : Macromolecules (cellular constituent) biosynthesis ; 1.6.3.3 : Lipid A ;	2.3.1.-	MYRISTOYLACYLTRAN-RXN	KDO-NAGLIPASYN-PWY$KDO-LIPASYN-PWY			no			14.3 : Biosynthesis and degradation of surface polysaccharides and lipopolysaccharides ;
CmetNA4v1_20170	CDS	-3	351964	352884	921	automatic/finished	no			putative lipid A biosynthesis acyltransferase	3 : Putative function from multiple computational evidences	e : enzyme	1 : Unknown	1.6 : Macromolecules (cellular constituent) biosynthesis ;	2.3.1.-	MYRISTOYLACYLTRAN-RXN	KDO-NAGLIPASYN-PWY$KDO-LIPASYN-PWY			no
CmetNA4v1_20171	CDS		353144	354307	1164	automatic/finished	no	metK	metX	methionine adenosyltransferase 1 (AdoMet synthetase)	2a : Function from experimental evidences in other organisms	e : enzyme	2 : Cytoplasmic	1.7.20 : S-adenosyl methionine biosynthesis ; 1.5.1.9 : Methionine ; 7.1 : Cytoplasm ;	2.5.1.6	S-ADENMETSYN-RXN	PWY-5041$PWY-6151$SAM-PWY$METHIONINE-DEG1-PWY			no			1.2 : Aspartate family ; 5 : Central intermediary metabolism ;
CmetNA4v1_20172	CDS		354456	355343	888	automatic/finished	no			conserved hypothetical protein	4 : Unknown function but conserved in other organisms	u : unknown	1 : Unknown							no			18 : Unknown function ;
CmetNA4v1_20173	CDS	-1	355389	356792	1404	automatic/finished	no			coniferyl aldehyde dehydrogenase (CALDH)	2b : Function from indirect experimental evidences (e.g. phenotypes)	e : enzyme	2 : Cytoplasmic	1.1.5.3 : Eugenol catabolism ;	1.2.1.68	RXN-1241$RXN-8014				no	9721273		6 : Energy metabolism ;
CmetNA4v1_20174	CDS		357040	358722	1683	automatic/finished	no			soluble choline dehydrogenase	2b : Function from indirect experimental evidences (e.g. phenotypes)	e : enzyme	1 : Unknown	1.7.18 : Betaine biosynthesis ; 1.5.1.10 : Glycine ; 1.5.1.11 : Serine ; 1.5.1.8 : Threonine ;	1.1.3.17	CHOLINE-OXIDASEII-RXN$CHOLINE-OXIDASE-RXN	PWY-3721			no			1.2 : Aspartate family ; 1.5 : Serine family ; 5 : Central intermediary metabolism ;
CmetNA4v1_20175	CDS	-3	358774	360315	1542	automatic/finished	no			Methyl-accepting chemotaxis protein										no
CmetNA4v1_20176	CDS	-1	360501	362186	1686	automatic/finished	no	aidB		isovaleryl CoA dehydrogenase	2b : Function from indirect experimental evidences (e.g. phenotypes)	e : enzyme	1 : Unknown	1.1.3.12 : Leucine degradation ; 1.1.3.14 : Valine degradation ;	1.3.99.10	RXN0-2301	LEU-DEG2-PWY			no	7961409		6.2 : Amino acids and amines ;
CmetNA4v1_20177	CDS	-1	362235	362579	345	automatic/finished	no			conserved protein of unknown function	4 : Unknown function but conserved in other organisms	u : unknown	1 : Unknown							no
CmetNA4v1_miscRNA3	misc_RNA		362416	362517	102	automatic/finished	no			TPP												Predicted by Rfam, accession=RF00059, e-value=6.3e-10.
CmetNA4v1_20178	CDS		362645	364522	1878	automatic/finished	no	thiC		thiamin (pyrimidine moiety) biosynthesis protein	2a : Function from experimental evidences in other organisms	f : factor	1 : Unknown	1.5.3.8 : Thiamine (Vitamin B1) ;		PYRIMSYN1-RXN				no	9371431		4.11 : Thiamine ;
CmetNA4v1_20179	CDS		364678	365910	1233	automatic/finished	no	thiO		D-AMINO ACID OXIDASE FLAVOPROTEIN OXIDOREDUCTASE; thiamine biosynthesis	2b : Function from indirect experimental evidences (e.g. phenotypes)	e : enzyme	2 : Cytoplasmic	1.5.3.8 : Thiamine (Vitamin B1) ;	1.4.3.3	D-AMINO-ACID-OXIDASE-RXN				no	9371431		4.11 : Thiamine ;
CmetNA4v1_20180	CDS		365924	366121	198	automatic/finished	no	thiS		sulfur transfer protein	2a : Function from experimental evidences in other organisms	c : carrier	1 : Unknown	1.5.3.8 : Thiamine (Vitamin B1) ;						no	8432721		4.11 : Thiamine ;
CmetNA4v1_20181	CDS		366129	366977	849	automatic/finished	no	thiG	thiB	thiamin biosynthesis ThiGH complex subunit	2a : Function from experimental evidences in other organisms	e : enzyme	1 : Unknown	1.5.3.8 : Thiamine (Vitamin B1) ;		THIAZOLSYN2-RXN				no	8432721		4.11 : Thiamine ;
CmetNA4v1_20182	CDS		366974	368104	1131	automatic/finished	no	thiE	RS00978	THIAMINE-PHOSPHATE PYROPHOSPHORYLASE	2a : Function from experimental evidences in other organisms	e : enzyme	1 : Unknown	1.5.3.8 : Thiamine (Vitamin B1) ;	2.5.1.3	THI-P-SYN-RXN$RXN-12611$RXN-12610	PWY-6894$PWY-6893$PWY-6907			no	8432721		4.11 : Thiamine ;
CmetNA4v1_20183	CDS		368241	368675	435	automatic/finished	no			putative thioesterase	3 : Putative function from multiple computational evidences	e : enzyme	1 : Unknown	1 : Metabolism ;						no			18.1 : Enzymes of unknown specificity ;
CmetNA4v1_20184	CDS	-2	368672	369115	444	automatic/finished	no			conserved hypothetical protein	4 : Unknown function but conserved in other organisms	u : unknown	1 : Unknown							no			18 : Unknown function ;
CmetNA4v1_20185	CDS	-3	369136	369966	831	automatic/finished	no	thiD	thiJ, thiA, thiN	bifunctional hydroxy-methylpyrimidine kinase and hydroxy-phosphomethylpyrimidine kinase	2a : Function from experimental evidences in other organisms	e : enzyme	1 : Unknown	1.5.3.8 : Thiamine (Vitamin B1) ;	2.7.4.7, 2.7.1.49	PYRIMSYN3-RXN$OHMETPYRKIN-RXN				no	10075431		4.11 : Thiamine ;
CmetNA4v1_miscRNA4	misc_RNA		370052	370125	74	automatic/finished	no			SAH_riboswitch												Predicted by Rfam, accession=RF01057, e-value=5.1e-09.
CmetNA4v1_20186	CDS		370264	371682	1419	automatic/finished	no	ahcY	RS02265	ADENOSYLHOMOCYSTEINASE (S-ADENOSYL-L-HOMOCYSTEINE HYDROLASE)	2b : Function from indirect experimental evidences (e.g. phenotypes)	e : enzyme	2 : Cytoplasmic	1.5.1.9 : Methionine ;	3.3.1.1	ADENOSYLHOMOCYSTEINASE-RXN	PWY-5041$METHIONINE-DEG1-PWY			no			1.2 : Aspartate family ;
CmetNA4v1_20187	CDS		371816	372163	348	automatic/finished	no			conserved hypothetical protein; putative TRANSMEMBRANE PROTEIN	4 : Unknown function but conserved in other organisms	u : unknown	11 : Membrane							no			18 : Unknown function ;
CmetNA4v1_20188	CDS		372211	373041	831	automatic/finished	no	metF		5,10-methylenetetrahydrofolate reductase	2a : Function from experimental evidences in other organisms	e : enzyme	1 : Unknown	1.7.17 : Formyl-tetrahydrofolate biosynthesis ;	1.5.1.20	1.5.1.20-RXN	1CMET2-PWY$PWY-2201			no	10201405		4.2 : Folic acid ;
CmetNA4v1_20189	CDS		373048	373410	363	automatic/finished	no			conserved hypothetical protein; TfoX N-terminal domain	4 : Unknown function but conserved in other organisms	u : unknown	1 : Unknown							no			18 : Unknown function ;
CmetNA4v1_20190	CDS		373423	374262	840	automatic/finished	no			conserved hypothetical protein, DUF82	4 : Unknown function but conserved in other organisms	u : unknown	1 : Unknown							no			18 : Unknown function ;
CmetNA4v1_20191	CDS	-1	374268	374876	609	automatic/finished	no			Putative 5-formyltetrahydrofolate cyclo-ligase	3 : Putative function from multiple computational evidences	e : enzyme	1 : Unknown	1 : Metabolism ;		5-FORMYL-THF-CYCLO-LIGASE-RXN	PWY-2201			no			18.1 : Enzymes of unknown specificity ;
CmetNA4v1_20192	CDS		375015	376982	1968	automatic/finished	no			putative SOLUBLE LYTIC MUREIN TRANSGLYCOSYLASE PRECURSOR TRANSMEMBRANE PROTEIN	3 : Putative function from multiple computational evidences	e : enzyme	9 : Periplasmic	1.6.7 : Peptidoglycan (murein) ; 6.2 : Peptidoglycan (murein) ;	3.2.1.-					no	10452894		14.2 : Biosynthesis and degradation of murein sacculus and peptidoglycan ;
CmetNA4v1_20193	CDS		377083	378105	1023	automatic/finished	no			putative NADH dehydrogenase	3 : Putative function from multiple computational evidences	e : enzyme	1 : Unknown	1.4 : Energy production/transport ;	1.6.99.3	RXN0-5248$RXN0-5244$RXN0-5267$NADH-DEHYDROGENASE-RXN$NADH-DEHYDROG-A-RXN$RXN0-5330	PWY0-1334$PWY0-1335$PWY-3781			no			6.5 : Electron transport ;
CmetNA4v1_20194	CDS		378274	378963	690	automatic/finished	no			putative Glutathione S-transferase	3 : Putative function from multiple computational evidences	e : enzyme	1 : Unknown	1.5.3.10 : Glutathione ;	2.5.1.18	GST-RXN$GSHTRAN-RXN				no			4.10 : Glutathione and analogs ;
CmetNA4v1_20195	CDS		378967	380211	1245	automatic/finished	no	cca		tRNA nucleotidyl transferase	2a : Function from experimental evidences in other organisms	e : enzyme	2 : Cytoplasmic	2.2.3 : RNA modification ; 7.1 : Cytoplasm ;	2.7.7.25	TRNA-CYTIDYLYLTRANSFERASE-RXN				no			9.4 : RNA processing ; 10.3 : tRNA and rRNA base modification ;
CmetNA4v1_20196	CDS	-1	380238	380432	195	automatic/finished	no			conserved hypothetical protein; putative membrane protein	4 : Unknown function but conserved in other organisms	u : unknown	1 : Unknown							no			18 : Unknown function ;
CmetNA4v1_20197	CDS	-3	380458	381654	1197	automatic/finished	no			conserved hypothetical protein, DUF185; putative exported protein	4 : Unknown function but conserved in other organisms	u : unknown	1 : Unknown							no			18 : Unknown function ;
CmetNA4v1_20198	CDS		381671	382489	819	automatic/finished	no			putative deshydrogenase	3 : Putative function from multiple computational evidences	e : enzyme	1 : Unknown	1 : Metabolism ; 1.4 : Energy production/transport ;	1.-.-.-					no			6.5 : Electron transport ; 18.1 : Enzymes of unknown specificity ;
CmetNA4v1_20199	CDS		382511	382909	399	automatic/finished	no			putative Dihydroneopterin aldolase	3 : Putative function from multiple computational evidences	e : enzyme	1 : Unknown	1.5.3.2 : Folic acid ;	4.1.2.25	H2NEOPTERINALDOL-RXN$RXN-10857	PWY-6147			no			4.2 : Folic acid ;
CmetNA4v1_20200	CDS		383025	383969	945	automatic/finished	no			putative ATP pyrophosphatase	3 : Putative function from multiple computational evidences	e : enzyme	2 : Cytoplasmic			ATP-PYROPHOSPHATASE-RXN				no
CmetNA4v1_20201	CDS	-2	383987	384850	864	automatic/finished	no			conserved protein of unknown function	4 : Unknown function but conserved in other organisms	u : unknown	1 : Unknown							no
CmetNA4v1_20202	CDS	-3	384838	385062	225	automatic/finished	no			protein of unknown function	5 : Unknown function	u : unknown	1 : Unknown							no
CmetNA4v1_20203	CDS		385081	386445	1365	automatic/finished	no	glmU	tms (B.s.), yieA	bifunctional: N-acetyl glucosamine-1-phosphate uridyltransferase (N-terminal); glucosamine-1-phosphate acetyl transferase (C-terminal)	2a : Function from experimental evidences in other organisms	e : enzyme	2 : Cytoplasmic	1.1.4 : Amines ; 1.6.3.1 : O antigen ; 1.6.4 : Enterobacterial common antigen (surface glycolipid) ; 1.6.7 : Peptidoglycan (murein) ; 1.7.10 : Sugar nucleotide biosynthesis, conversions ; 1.7.12 : Amino sugar conversions ; 6.1 : Membrane ; 6.2 : Peptidoglycan (murein) ; 6.3 : Surface antigens (ECA, O antigen of LPS) ; 7.1 : Cytoplasm ;	2.7.7.23, 2.3.1.57	NAG1P-URIDYLTRANS-RXN$2.3.1.157-RXN	OANTIGEN-PWY$UDPNAGSYN-PWY			no	11084021		5.1 : Amino sugars ; 6.2 : Amino acids and amines ; 6.11 : Sugars ; 14.2 : Biosynthesis and degradation of murein sacculus and peptidoglycan ; 14.3 : Biosynthesis and degradation of surface polysaccharides and lipopolysaccharides ;
CmetNA4v1_20204	CDS		386460	388298	1839	automatic/finished	no	glmS		L-glutamine:D-fructose-6-phosphate aminotransferase	2a : Function from experimental evidences in other organisms	e : enzyme	2 : Cytoplasmic	1.6.3.1 : O antigen ; 1.6.7 : Peptidoglycan (murein) ; 1.7.10 : Sugar nucleotide biosynthesis, conversions ; 1.7.12 : Amino sugar conversions ; 6.1 : Membrane ; 6.2 : Peptidoglycan (murein) ; 6.3 : Surface antigens (ECA, O antigen of LPS) ; 7.1 : Cytoplasm ;	2.6.1.16	L-GLN-FRUCT-6-P-AMINOTRANS-RXN	OANTIGEN-PWY$UDPNAGSYN-PWY			no			5.1 : Amino sugars ; 6.11 : Sugars ; 14.2 : Biosynthesis and degradation of murein sacculus and peptidoglycan ; 14.3 : Biosynthesis and degradation of surface polysaccharides and lipopolysaccharides ;
CmetNA4v1_20205	CDS		388774	389442	669	automatic/finished	no			putative type-4 fimbrial pilin related signal peptide protein	3 : Putative function from multiple computational evidences									no
CmetNA4v1_20206	CDS		389433	389975	543	automatic/finished	no			putative type-4 fimbrial biogenesis pilV-related transmembrane protein	3 : Putative function from multiple computational evidences	s : structure	1 : Unknown	1.6.13 : Fimbria, pili, curli ; 6.5 : Pilus ; 4.3.A.7 : The Type IV (Conjugal DNA-Protein Transfer) Secretory Pathway (IVSP) Family ;						no			7 : Transport and binding proteins ; 14.1 : Surface structures ;
CmetNA4v1_20207	CDS		389987	390715	729	automatic/finished	no			putative type 4 fimbrial biogenesis transmembrane pilW-related protein precursor	3 : Putative function from multiple computational evidences	s : structure	1 : Unknown	1.6.13 : Fimbria, pili, curli ; 6.5 : Pilus ; 4.3.A.7 : The Type IV (Conjugal DNA-Protein Transfer) Secretory Pathway (IVSP) Family ;						no			7 : Transport and binding proteins ; 14.1 : Surface structures ;
CmetNA4v1_20208	CDS		390712	391308	597	automatic/finished	no			putative type-4 fimbrial biogenesis transmembrane pilX-related protein precursor	3 : Putative function from multiple computational evidences	s : structure	1 : Unknown	1.6.13 : Fimbria, pili, curli ; 6.5 : Pilus ; 4.3.A.7 : The Type IV (Conjugal DNA-Protein Transfer) Secretory Pathway (IVSP) Family ;						no			7 : Transport and binding proteins ; 14.1 : Surface structures ;
CmetNA4v1_20209	CDS		391305	394688	3384	automatic/finished	no			putative type-4 fimbrial biogenesis protein precursor; pily1 domain, Con A-like domain	3 : Putative function from multiple computational evidences	s : structure	1 : Unknown	1.6.13 : Fimbria, pili, curli ; 6.5 : Pilus ; 4.3.A.7 : The Type IV (Conjugal DNA-Protein Transfer) Secretory Pathway (IVSP) Family ;						no			7 : Transport and binding proteins ; 14.1 : Surface structures ;
CmetNA4v1_20210	CDS		394691	395134	444	automatic/finished	no			putative TYPE 4 fimbrial BIOGENESIS TRANSMEMBRANE pilE-related PROTEIN	3 : Putative function from multiple computational evidences	s : structure	11 : Membrane	1.6.13 : Fimbria, pili, curli ; 6.5 : Pilus ; 4.3.A.7 : The Type IV (Conjugal DNA-Protein Transfer) Secretory Pathway (IVSP) Family ;						no			7 : Transport and binding proteins ; 14.1 : Surface structures ;
CmetNA4v1_20211	CDS		395153	395329	177	automatic/finished	no			conserved protein of unknown function	4 : Unknown function but conserved in other organisms	u : unknown	1 : Unknown							no
CmetNA4v1_20212	CDS		395544	396140	597	automatic/finished	no	ribA		GTP cyclohydrolase II	2b : Function from indirect experimental evidences (e.g. phenotypes)	e : enzyme	1 : Unknown	1.5.3.9 : Riboflavin (Vitamin B2), FAD, FMN ;	3.5.4.25	GTP-CYCLOHYDRO-II-RXN	RIBOSYN2-PWY			no	7642114		4.9 : Riboflavin, FMN, and FAD ;
CmetNA4v1_20213	CDS		396354	396830	477	automatic/finished	no	bfr		bacterioferritin, iron storage homoprotein	2a : Function from experimental evidences in other organisms	c : carrier	2 : Cytoplasmic	5.5.7 : Fe aquisition ; 7.1 : Cytoplasm ;						no	2661540, 9867433		15.10 : Adaptations to atypical conditions ;
CmetNA4v1_tRNA1	tRNA		396915	396989	75	automatic/finished	no			Cys tRNA												tRNA Cys anticodon GCA, Cove score 62.36
CmetNA4v1_20214	CDS	-3	397285	397995	711	automatic/finished	no			protein of unknown function	5 : Unknown function	u : unknown	1 : Unknown							no
CmetNA4v1_20215	CDS		397351	397794	444	automatic/finished	no			putative GCN5-related N-acetyltransferase	3 : Putative function from multiple computational evidences	e : enzyme	1 : Unknown	1 : Metabolism ;						no			18.1 : Enzymes of unknown specificity ;
CmetNA4v1_20216	CDS		397875	398858	984	automatic/finished	no	qor		Quinone oxidoreductase					1.6.5.5	QOR-RXN				no
CmetNA4v1_20217	CDS	-3	398881	400014	1134	automatic/finished	no			putative cation efflux protein	3 : Putative function from multiple computational evidences	t : transporter	5 : Inner membrane protein	4.2.A.4 : The Cation Diffusion Facilitator (CDF) Family ;						no			7 : Transport and binding proteins ;
CmetNA4v1_20218	CDS	-2	400049	400975	927	automatic/finished	no	dmlR		HTH-type transcriptional regulator DmlR										no
CmetNA4v1_20219	CDS		401110	402528	1419	automatic/finished	no	leuC		3-isopropylmalate isomerase subunit, dehydratase component	2a : Function from experimental evidences in other organisms	e : enzyme	2 : Cytoplasmic	1.5.1.19 : Leucine ; 7.1 : Cytoplasm ;	4.2.1.33	RXN-8991$3-ISOPROPYLMALISOM-RXN	LEUSYN-PWY			no			1.4 : Pyruvate family ;
CmetNA4v1_20220	CDS		402521	403174	654	automatic/finished	no	leuD		3-isopropylmalate dehydratase small subunit 1					4.2.1.33	RXN-8991$3-ISOPROPYLMALISOM-RXN	LEUSYN-PWY			no
CmetNA4v1_20221	CDS		403188	404066	879	automatic/finished	no	dehH	RS00691	Haloacetate dehalogenase	2b : Function from indirect experimental evidences (e.g. phenotypes)	e : enzyme	1 : Unknown	1.1 : Carbon compound utilization ;	3.8.1.3	RXN-11761$HALOACETATE-DEHALOGENASE-RXN	PWY-6646			no	1512562		6 : Energy metabolism ;
CmetNA4v1_20222	CDS		404309	404512	204	automatic/finished	no			protein of unknown function	5 : Unknown function	u : unknown	1 : Unknown							no
CmetNA4v1_20223	CDS		404588	405208	621	automatic/finished	no			putative signal peptide protein	3 : Putative function from multiple computational evidences									no
CmetNA4v1_20224	CDS	-3	405226	406671	1446	automatic/finished	no			putative transcriptional regulator, GntR family; C-term aminotransferase motif	3 : Putative function from multiple computational evidences	r : regulator	2 : Cytoplasmic	3.1.2 : Transcriptional level ;						no			12.1 : DNA interactions ;
CmetNA4v1_20225	CDS		406962	408293	1332	automatic/finished	no			Omega-amino acid--pyruvate aminotransferase (Omega-APT) (Beta-alanine--pyruvate aminotransferase)	2a : Function from experimental evidences in other organisms	e : enzyme	2 : Cytoplasmic	1.1.3.1 : L-alanine degradation ; 1.5.1 : Amino acids ; 1.1.2.3 : Propionate degradation ;	2.6.1.18	2.6.1.18-RXN	PWY-3941$PWY-1781			no	6822556		1 : Amino acid biosynthesis ; 6.2 : Amino acids and amines ;
CmetNA4v1_20226	CDS		408334	409851	1518	automatic/finished	no			methylmalonate-semialdehyde dehydrogenase (acylating)	2a : Function from experimental evidences in other organisms	e : enzyme	1 : Unknown	1.1.3 : Amino acids ; 1.1.2.3 : Propionate degradation ;	1.2.1.27	1.2.1.27-RXN$RXN-11213$RXN-11212	VALDEG-PWY			no			6.2 : Amino acids and amines ;
CmetNA4v1_20227	CDS		410048	411457	1410	automatic/finished	no			Cationic amino acid transporter	2b : Function from indirect experimental evidences (e.g. phenotypes)	t : transporter	11 : Membrane	4.2.A.3 : The Amino Acid-Polyamine-Choline (APC) Family ;						no			7 : Transport and binding proteins ;
CmetNA4v1_20228	CDS	-2	411458	412858	1401	automatic/finished	no			putative transcriptional regulator, GntR family; C-term aminotransferase motif	3 : Putative function from multiple computational evidences	r : regulator	2 : Cytoplasmic	3.1.2 : Transcriptional level ;						no			12.1 : DNA interactions ;
CmetNA4v1_20229	CDS		413019	413357	339	automatic/finished	no			conserved hypothetical protein	4 : Unknown function but conserved in other organisms	u : unknown	1 : Unknown							no			18 : Unknown function ;
CmetNA4v1_20230	CDS		413293	413529	237	automatic/finished	no			protein of unknown function	5 : Unknown function	u : unknown	1 : Unknown							no
CmetNA4v1_20231	CDS		413607	416888	3282	automatic/finished	no			METHYLMALONYL-COA MUTASE	2b : Function from indirect experimental evidences (e.g. phenotypes)	e : enzyme	1 : Unknown	1.1.2.3 : Propionate degradation ; 1.7.1 : Unassigned reversible reactions ;	5.4.99.2	METHYLMALONYL-COA-MUT-RXN	PROPIONMET-PWY$PWY0-43			no			5 : Central intermediary metabolism ; 6 : Energy metabolism ;
CmetNA4v1_20232	CDS		416978	417415	438	automatic/finished	no			putative ribonucleoside phosphate hydrolase, Histidine triad (HIT) protein	3 : Putative function from multiple computational evidences	e : enzyme	1 : Unknown	1.5.2.1 : Purine biosynthesis ; 1.7 : Central intermediary metabolism ;						no			2.3 : Purine ribonucleotide biosynthesis ; 5 : Central intermediary metabolism ;
CmetNA4v1_20233	CDS		417472	418326	855	automatic/finished	no			3-HYDROXYBUTYRYL-COA DEHYDROGENASE	2b : Function from indirect experimental evidences (e.g. phenotypes)	e : enzyme	1 : Unknown	1.1.5.1 : Phenylacetic acid degradation ; 1.1.2 : Fatty acids (fatty acid oxidation) ;	1.1.1.157	3-HYDROXYBUTYRYL-COA-DEHYDROGENASE-RXN				no	8655474		3.2 : Degradation ; 6 : Energy metabolism ;
CmetNA4v1_20234	CDS	-1	418434	419111	678	automatic/finished	no			putative transcriptional regulator, crp family	3 : Putative function from multiple computational evidences	r : regulator	2 : Cytoplasmic	3.1.2 : Transcriptional level ;						no			12.1 : DNA interactions ;
CmetNA4v1_20235	CDS		419368	421332	1965	automatic/finished	no			putative AMP-dependent synthetase and ligase	3 : Putative function from multiple computational evidences	e : enzyme	1 : Unknown	1 : Metabolism ;	6.2.1.26	RXN-7614$O-SUCCINYLBENZOATE-COA-LIG-RXN	PWY-5837			no			18.1 : Enzymes of unknown specificity ;
CmetNA4v1_20236	CDS		421349	422290	942	automatic/finished	no			putative transport protein (ABC superfamily, atp_bind)	3 : Putative function from multiple computational evidences	t : transporter	2 : Cytoplasmic	4.3.A.1.a : ATP binding component ;						no			7 : Transport and binding proteins ;
CmetNA4v1_20237	CDS		422331	423245	915	automatic/finished	no			putative branched-chain amino acid transport system permease, membrane component	3 : Putative function from multiple computational evidences	t : transporter	5 : Inner membrane protein	4.3.A.1.m : membrane component ;						no			7 : Transport and binding proteins ;
CmetNA4v1_20238	CDS		423258	424334	1077	automatic/finished	no			putative branched-chain amino acid transport system permease, membrane component	3 : Putative function from multiple computational evidences	t : transporter	5 : Inner membrane protein	4.3.A.1.m : membrane component ;						no			7 : Transport and binding proteins ;
CmetNA4v1_20239	CDS		424399	425736	1338	automatic/finished	no			putative branched amino acid transport system permease, periplasmic binding component	3 : Putative function from multiple computational evidences	t : transporter	9 : Periplasmic	4.3.A.1.p : periplasmic binding component ;						no			7 : Transport and binding proteins ;
CmetNA4v1_20240	CDS		425721	426614	894	automatic/finished	no			putative branched-chain amino acid transport system permease, ATP_binding component	3 : Putative function from multiple computational evidences	t : transporter	2 : Cytoplasmic	4.3.A.1.a : ATP binding component ;						no			7 : Transport and binding proteins ;
CmetNA4v1_20241	CDS		426629	427891	1263	automatic/finished	no			putative phenylacetate-CoA ligase	3 : Putative function from multiple computational evidences	e : enzyme	1 : Unknown	1 : Metabolism ;	6.2.1.30	RXN-10819$PHENYLACETATE--COA-LIGASE-RXN	PWY0-321			no			18.1 : Enzymes of unknown specificity ;
CmetNA4v1_20242	CDS	-3	427942	428394	453	automatic/finished	no			conserved hypothetical protein, DUF454; putative membrane component	4 : Unknown function but conserved in other organisms	u : unknown	11 : Membrane							no			18 : Unknown function ;
CmetNA4v1_20243	CDS	-2	428435	429412	978	automatic/finished	no			conserved hypothetical protein, Putative 2-nitropropane dioxygenase	4 : Unknown function but conserved in other organisms	u : unknown	1 : Unknown	1 : Metabolism ;		2-NITROPROPANE-DIOXYGENASE-RXN	PWY-723			no			18.1 : Enzymes of unknown specificity ;
CmetNA4v1_20244	CDS	-1	429816	431009	1194	automatic/finished	no			putative S-adenosyl-L-methionine-dependent methyltransferase	3 : Putative function from multiple computational evidences	e : enzyme	1 : Unknown	1 : Metabolism ;						no			18.1 : Enzymes of unknown specificity ;
CmetNA4v1_20245	CDS	-3	431014	431322	309	automatic/finished	no			conserved hypothetical protein, DUF493	4 : Unknown function but conserved in other organisms	u : unknown	1 : Unknown							no			18 : Unknown function ;
CmetNA4v1_20246	CDS	-1	431340	432533	1194	automatic/finished	no	dacC		D-alanyl-D-alanine carboxypeptidase; penicillin-binding protein 6a	2a : Function from experimental evidences in other organisms	e : enzyme	9 : Periplasmic	5.1 : Cell division ; 5.6.4 : Drug resistance/sensitivity ; 7.2 : Periplasmic space ; 1.6.7 : Peptidoglycan (murein) ;	3.4.16.4	3.4.16.4-RXN				no			14.2 : Biosynthesis and degradation of murein sacculus and peptidoglycan ; 15.1 : Cell division ; 15.8 : Toxin production and resistance ;
CmetNA4v1_20247	CDS	-3	432577	433221	645	automatic/finished	no			putative hydrolase	3 : Putative function from multiple computational evidences	e : enzyme	1 : Unknown	1 : Metabolism ;						no			18.1 : Enzymes of unknown specificity ;
CmetNA4v1_20248	CDS	-1	433356	433676	321	automatic/finished	no			conserved hypothetical protein; putative FERREDOXIN 2FE-2S	4 : Unknown function but conserved in other organisms	u : unknown	1 : Unknown							no			18 : Unknown function ;
CmetNA4v1_20249	CDS		434126	435415	1290	automatic/finished	no	dctA	out (S.t.)	citrate and C4-dicarboxylic acids transport protein (DAACS family)	2a : Function from experimental evidences in other organisms	t : transporter	5 : Inner membrane protein	1.1.1 : Carbohydrates/Carbon compounds ; 4.2.A.23 : The Dicarboxylate/Amino Acid:Cation (Na or H) Symporter (DAACS) Family ; 6.1 : Membrane ; 7.3 : Inner membrane ;						no	10482502		6 : Energy metabolism ; 7 : Transport and binding proteins ;
CmetNA4v1_20250	CDS		435417	437540	2124	automatic/finished	no	dctB	RS03298	sensor histiidne kinase, transcriptional regulator of C4-DICARBOXYLATE TRANSPORT	2a : Function from experimental evidences in other organisms	rc : receptor	5 : Inner membrane protein	1.1.1 : Carbohydrates/Carbon compounds ; 3.1.2.4.3 : Two-component regulatory systems (external signal) ;						no	3671068		6 : Energy metabolism ; 13.1 : Two-component systems ;
CmetNA4v1_20251	CDS		437577	438911	1335	automatic/finished	no	dctD	RS03299	transcriptional response regulator, C4-DICARBOXYLATE TRANSPORT RESPONSE REGULATOR	2a : Function from experimental evidences in other organisms	r : regulator	2 : Cytoplasmic	1.1.1 : Carbohydrates/Carbon compounds ; 3.1.2.4.3 : Two-component regulatory systems (external signal) ;						no	3671068		6 : Energy metabolism ; 13.1 : Two-component systems ;
CmetNA4v1_20252	CDS		439048	440649	1602	automatic/finished	no	hutH		Histidine ammonia-lyase					4.3.1.3	HISTIDINE-AMMONIA-LYASE-RXN	HISDEG-PWY$PWY-5028			no
CmetNA4v1_20253	CDS	-2	440687	442795	2109	automatic/finished	no			putative ATP-dependent DNA helicase	3 : Putative function from multiple computational evidences	e : enzyme	2 : Cytoplasmic	2.1 : DNA related ;	3.6.1.-	RXN0-4261				no			8 : DNA metabolism ;
CmetNA4v1_20254	CDS	-2	442949	443488	540	automatic/finished	no			conserved hypothetical protein; putative TRANSMEMBRANE PROTEIN	4 : Unknown function but conserved in other organisms	u : unknown	1 : Unknown							no			18 : Unknown function ;
CmetNA4v1_20255	CDS	-3	443617	444114	498	automatic/finished	no			conserved hypothetical protein	4 : Unknown function but conserved in other organisms	u : unknown	1 : Unknown							no			18 : Unknown function ;
CmetNA4v1_20256	CDS		444247	444834	588	automatic/finished	no			putative lipoprotein	3 : Putative function from multiple computational evidences	lp : lipoprotein	1 : Unknown							no
CmetNA4v1_20257	CDS		444877	445521	645	automatic/finished	no			putative neutral amino-acid efflux system, rhtB family (lysine, threonine, homoserine)	3 : Putative function from multiple computational evidences	t : transporter	5 : Inner membrane protein	4.2.A.76 : The Resistance to Homoserine/Threonine (RhtB) Family ;						no			7 : Transport and binding proteins ;
CmetNA4v1_20258	CDS		445603	445743	141	automatic/finished	no			protein of unknown function	5 : Unknown function	u : unknown	1 : Unknown							no
CmetNA4v1_20259	CDS	-3	445795	447333	1539	automatic/finished	no			putative ATPase, Mg chelatase-related protein	3 : Putative function from multiple computational evidences	e : enzyme	1 : Unknown							no
CmetNA4v1_20260	CDS	-2	447416	447673	258	automatic/finished	no			conserved hypothetical protein, DUF526	4 : Unknown function but conserved in other organisms	u : unknown	1 : Unknown							no			18 : Unknown function ;
CmetNA4v1_20261	CDS		448226	449026	801	automatic/finished	no			conserved hypothetical protein; putative exported protein	4 : Unknown function but conserved in other organisms	u : unknown	1 : Unknown							no			18 : Unknown function ;
CmetNA4v1_20262	CDS		449079	449417	339	automatic/finished	no	glnB/K		regulatory protein (P-II) for nitrogen assimilation by glutamine synthetase (ATase); signal transduction protein, associated to amtB, ammonium transporter	2b : Function from indirect experimental evidences (e.g. phenotypes)	r : regulator	2 : Cytoplasmic	1.5.1.2 : Glutamine ; 2.2.2 : Transcription related ; 3.1.3.3 : Inhibition / activation of enzymes ; 7.1 : Cytoplasm ;						no	14668330		1.3 : Glutamate family ; 9 : Transcription ; 12.3 : Protein interactions ;
CmetNA4v1_20263	CDS		449449	450981	1533	automatic/finished	no	amtB	ybaG	ammonium transport protein (Amt family)	2a : Function from experimental evidences in other organisms	t : transporter	5 : Inner membrane protein	4.2.A.49 : The Ammonium Transporter (Amt) Family ; 6.1 : Membrane ; 7.3 : Inner membrane ;						no	10637624, 15361618, 15563598		7 : Transport and binding proteins ;
CmetNA4v1_20264	CDS		450993	451274	282	automatic/finished	no			protein of unknown function	5 : Unknown function	u : unknown	1 : Unknown							no
CmetNA4v1_20265	CDS	-3	451123	451320	198	automatic/finished	no			conserved protein of unknown function	4 : Unknown function but conserved in other organisms	u : unknown	1 : Unknown							no
CmetNA4v1_20266	CDS		451438	452739	1302	automatic/finished	no			conserved hypothetical protein	4 : Unknown function but conserved in other organisms	u : unknown	1 : Unknown							no			18 : Unknown function ;
CmetNA4v1_20267	CDS		452764	453717	954	automatic/finished	no	gshB	gsh-II	glutathione synthetase	2a : Function from experimental evidences in other organisms	e : enzyme	2 : Cytoplasmic	1.5.3.10 : Glutathione ;	6.3.2.3	GLUTATHIONE-SYN-RXN	PWY-4041$GLUTATHIONESYN-PWY			no	9010922		4.10 : Glutathione and analogs ;
CmetNA4v1_20268	CDS		453842	454297	456	automatic/finished	no			PTS system fructose IIA component (phosphoenolpyruvate-dependent sugar phosphotransferase system)	2a : Function from experimental evidences in other organisms	t : transporter	2 : Cytoplasmic	1.1.1 : Carbohydrates/Carbon compounds ; 4.4.A.6 : The PTS Mannose-Fructose-Sorbose (Man) Family ;						no	2117666		6 : Energy metabolism ; 13.2 : PTS ;
CmetNA4v1_20269	CDS		454266	454535	270	automatic/finished	no	ptsH	Hpr, ctr, hpr	PTS family Hpr protein, phosphohistidinoprotein-hexose phosphotransferase	2a : Function from experimental evidences in other organisms	t : transporter	1 : Unknown	1.1.1 : Carbohydrates/Carbon compounds ; 4.8.A.8 : The Phosphotransferase System HPr (HPr) Family ;						no			6 : Energy metabolism ; 7 : Transport and binding proteins ;
CmetNA4v1_20270	CDS		454586	456343	1758	automatic/finished	no	ptsI	ctr	PTS family enzyme I and Hpr components, PEP-protein phosphotransferase	2a : Function from experimental evidences in other organisms	t : transporter	1 : Unknown	1.1.1 : Carbohydrates/Carbon compounds ; 4.8.A.7 : The Phosphotransferase System Enzyme I (EI) Family ;						no			6 : Energy metabolism ; 7 : Transport and binding proteins ;
CmetNA4v1_20271	CDS	-1	456312	456506	195	automatic/finished	no			protein of unknown function	5 : Unknown function	u : unknown	1 : Unknown							no
CmetNA4v1_20272	CDS		456580	456885	306	automatic/finished	no	bfd	RS03316	BACTERIOFERRITIN-ASSOCIATED FERREDOXIN PROTEIN	2b : Function from indirect experimental evidences (e.g. phenotypes)	c : carrier	2 : Cytoplasmic	5.5.7 : Fe aquisition ; 1.4 : Energy production/transport ;						no			6.5 : Electron transport ; 15.10 : Adaptations to atypical conditions ;
CmetNA4v1_20273	CDS		457031	457510	480	automatic/finished	no	bfr		bacterioferritin, an iron storage homoprotein	2a : Function from experimental evidences in other organisms	c : carrier	2 : Cytoplasmic	5.5.7 : Fe aquisition ; 7.1 : Cytoplasm ;						no			15.10 : Adaptations to atypical conditions ;
CmetNA4v1_20274	CDS	-2	457727	458479	753	automatic/finished	no	moeB	chlN	molybdopterin synthase sulfurylase	2a : Function from experimental evidences in other organisms	e : enzyme	1 : Unknown	1.5.3.4 : Molybdenum (molybdopterin) ;		RXN-11361	PWY-6823			no			4.6 : Molybdopterin ;
CmetNA4v1_20275	CDS	-1	458604	460211	1608	automatic/finished	no			Carboxy-terminal-processing protease, Peptidase S41 family; putative autocatalytic processed precursor	2b : Function from indirect experimental evidences (e.g. phenotypes)	e : enzyme	1 : Unknown	1.2.3 : Proteins/peptides/glycopeptides ;	3.4.21.102	3.4.21.102-RXN				no			11.4 : Degradation of proteins, peptides, and glycopeptides ;
CmetNA4v1_20276	CDS	-2	460409	461155	747	automatic/finished	no	gpmA	gpm	phosphoglyceromutase 1	2a : Function from experimental evidences in other organisms	e : enzyme	1 : Unknown	1.1.1.23 : Galactose degradation ; 1.3.1 : Glycolysis ; 1.7.8 : Gluconeogenesis ;	5.4.2.1	3PGAREARR-RXN	GLUCONEO-PWY$PWY-6142$PWY-1622$GLYCOLYSIS-E-D$ANAGLYCOLYSIS-PWY$GLYCOLYSIS			no			6.8 : Glycolysis/gluconeogenesis ; 6.11 : Sugars ;
CmetNA4v1_20277	CDS		461174	461713	540	automatic/finished	no			putative rhodanese-related sulfurtransferase; putative membrane protein (modular protein)	3 : Putative function from multiple computational evidences									no
CmetNA4v1_20278	CDS		461792	462049	258	automatic/finished	no	grxC	yibM	glutaredoxin	2a : Function from experimental evidences in other organisms	c : carrier	1 : Unknown	1.6.15.2 : Thioredoxin, glutaredoxin ;						no			6.5 : Electron transport ;
CmetNA4v1_20279	CDS		462227	462745	519	automatic/finished	no	secB		molecular chaperone in protein export, enhances activity of SecA (General Secretory Pathway)	2a : Function from experimental evidences in other organisms	f : factor	2 : Cytoplasmic	2.3.4 : Chaperoning, folding ; 7.1 : Cytoplasm ; 4.3.A.5 : The Type II (General) Secretory Pathway (IISP) Family ;						no	15128935		7 : Transport and binding proteins ; 11.3 : Protein folding and stabilization ;
CmetNA4v1_20280	CDS		462864	463892	1029	automatic/finished	no	gpsA		glycerol-3-phosphate dehydrogenase (NAD)	2a : Function from experimental evidences in other organisms	e : enzyme	2 : Cytoplasmic	1.1.1.23 : Galactose degradation ; 1.7.6 : Glycerol metabolism ; 1.8.1 : Phosphorous metabolism ; 7.1 : Cytoplasm ;	1.1.1.94	GLYC3PDEHYDROGBIOSYN-RXN	PWY-5667$PWY0-1319$PWY4FS-7$PWY4FS-8			no			5.3 : Phosphorus compounds ; 6.11 : Sugars ;
CmetNA4v1_20281	CDS		463899	464882	984	automatic/finished	no			conserved hypothetical protein, UPF0065	4 : Unknown function but conserved in other organisms	u : unknown	9 : Periplasmic							no	12562821		18 : Unknown function ;
CmetNA4v1_20282	CDS	-3	464896	465366	471	automatic/finished	no			putative tRNA/rRNA methyltransferase	3 : Putative function from multiple computational evidences	e : enzyme	1 : Unknown	2.2.3 : RNA modification ;	2.1.1.-					no			9.4 : RNA processing ; 10.3 : tRNA and rRNA base modification ;
CmetNA4v1_20283	CDS	-2	465419	465976	558	automatic/finished	no			putative amidophosphoribosyltransferase, comF/gntX family (fragment)	3 : Putative function from multiple computational evidences									no
CmetNA4v1_20284	CDS		466184	467185	1002	automatic/finished	no			putative BIOTIN SYNTHESIS METHYLTRANSFERASE, bioC	3 : Putative function from multiple computational evidences	e : enzyme	1 : Unknown	1.5.3.1 : Biotin ;	2.1.1.-					no			4.1 : Biotin ;
CmetNA4v1_20285	CDS		467449	467964	516	automatic/finished	no			conserved hypothetical protein, putative TRANSMEMBRANE PROTEIN	4 : Unknown function but conserved in other organisms	u : unknown	11 : Membrane							no			18 : Unknown function ;
CmetNA4v1_20286	CDS		468026	469294	1269	automatic/finished	no	coxB	RS03330	CYTOCHROME C OXIDASE POLYPEPTIDE II PRECURSOR (CYTOCHROME AA3 SUBUNIT 2) TRANSMEMBRANE PROTEIN	2a : Function from experimental evidences in other organisms	c : carrier	11 : Membrane	1.4 : Energy production/transport ; 1.6.15.1 : Cytochromes ;	1.9.3.1	CYTOCHROME-C-OXIDASE-RXN	PWY-3781			no			6.5 : Electron transport ;
CmetNA4v1_20287	CDS		469337	470947	1611	automatic/finished	no	coxA	RS03331	CYTOCHROME C OXIDASE POLYPEPTIDE I (CYTOCHROME AA3 SUBUNIT 1) TRANSMEMBRANE PROTEIN	2a : Function from experimental evidences in other organisms	c : carrier	11 : Membrane	1.4 : Energy production/transport ; 1.6.15.1 : Cytochromes ;	1.9.3.1	CYTOCHROME-C-OXIDASE-RXN	PWY-3781			no			6.5 : Electron transport ;
CmetNA4v1_20288	CDS		470974	471165	192	automatic/finished	no			conserved hypothetical protein	4 : Unknown function but conserved in other organisms	u : unknown	1 : Unknown							no			18 : Unknown function ;
CmetNA4v1_20289	CDS		471202	471798	597	automatic/finished	no	ctaG	RS03333	Cytochrome c oxidase assembly protein CtaG/Cox11; transmembrane protein	2b : Function from indirect experimental evidences (e.g. phenotypes)	f : factor	11 : Membrane	1.4 : Energy production/transport ; 1.6.15.1 : Cytochromes ;						no			6.5 : Electron transport ;
CmetNA4v1_20290	CDS		471801	472028	228	automatic/finished	no			conserved hypothetical protein; putative TRANSMEMBRANE PROTEIN	4 : Unknown function but conserved in other organisms	u : unknown	1 : Unknown							no			18 : Unknown function ;
CmetNA4v1_20291	CDS		472126	472986	861	automatic/finished	no	coxC	RS03335	CYTOCHROME C OXIDASE SUBUNIT III TRANSMEMBRANE PROTEIN	2a : Function from experimental evidences in other organisms	c : carrier	11 : Membrane	1.4 : Energy production/transport ; 1.6.15.1 : Cytochromes ;	1.9.3.1	CYTOCHROME-C-OXIDASE-RXN	PWY-3781			no			6.5 : Electron transport ;
CmetNA4v1_20292	CDS	-2	473087	473296	210	automatic/finished	no			conserved hypothetical protein; putative TRANSMEMBRANE PROTEIN	4 : Unknown function but conserved in other organisms	u : unknown	1 : Unknown							no			18 : Unknown function ;
CmetNA4v1_20293	CDS		473354	474115	762	automatic/finished	no			putative TRANSMEMBRANE CYTOCHROME OXIDASE COMPLEX BIOGENESIS FACTOR	3 : Putative function from multiple computational evidences	f : factor	11 : Membrane	1.4 : Energy production/transport ; 1.6.15.1 : Cytochromes ;						no			6.5 : Electron transport ;
CmetNA4v1_20294	CDS		474102	474779	678	automatic/finished	no			conserved hypothetical protein; putative TRANSMEMBRANE PROTEIN	4 : Unknown function but conserved in other organisms	u : unknown	1 : Unknown							no			18 : Unknown function ;
CmetNA4v1_20295	CDS		474785	475888	1104	automatic/finished	no	ctaA	RS03339	CYTOCHROME C oxidase assembly protein, AA3 subunit-CONTROLLING TRANSMEMBRANE PROTEIN	2b : Function from indirect experimental evidences (e.g. phenotypes)	f : factor	11 : Membrane	1.4 : Energy production/transport ; 1.6.15.1 : Cytochromes ;						no			6.5 : Electron transport ;
CmetNA4v1_20296	CDS		475885	476823	939	automatic/finished	no	ctaB	RS03340	PROTOHEME IX FARNESYLTRANSFERASE (HEME O SYNTHASE) TRANSMEMBRANE PROTEIN	2a : Function from experimental evidences in other organisms	e : enzyme	11 : Membrane	1.4 : Energy production/transport ; 1.6.15.1 : Cytochromes ;	2.5.1.-					no			6.5 : Electron transport ;
CmetNA4v1_20297	CDS		476908	477522	615	automatic/finished	no			putative cytochrome c oxidase assembly factor, scoC	3 : Putative function from multiple computational evidences	f : factor	1 : Unknown	1.4 : Energy production/transport ; 1.6.15.1 : Cytochromes ;						no			6.5 : Electron transport ;
CmetNA4v1_20298	CDS	-1	477576	478511	936	automatic/finished	no	rpoH	fam, hin, htpR	RNA polymerase sigma H (sigma 32) factor; transcription of heat shock and stress proteins	2a : Function from experimental evidences in other organisms	f : factor	2 : Cytoplasmic	2.2.2 : Transcription related ; 3.1.2.1 : Sigma factors, anti-sigmafactors ; 3.3.3 : Stimulon (ie. environmental stimulus) ; 5.5.2 : Temperature extremes ; 5.5 : Adaptation to stress ;						no			9 : Transcription ; 12.1 : DNA interactions ; 15.10 : Adaptations to atypical conditions ;
CmetNA4v1_20299	CDS		478843	479718	876	automatic/finished	no			conserved hypothetical protein, PIRIN-LIKE PROTEIN	4 : Unknown function but conserved in other organisms	u : unknown	2 : Cytoplasmic							no	16980458		18 : Unknown function ;
CmetNA4v1_20300	CDS	-2	479759	480748	990	automatic/finished	no			putative phosphoribosyl transferase	3 : Putative function from multiple computational evidences	e : enzyme	1 : Unknown	1 : Metabolism ;	2.4.2.18	PRTRANS-RXN	TRPSYN-PWY			no			18.1 : Enzymes of unknown specificity ;
CmetNA4v1_20301	CDS	-3	480847	481650	804	automatic/finished	no	nasD		nitrate ABC transporter, ATP_binding component	2b : Function from indirect experimental evidences (e.g. phenotypes)	t : transporter	2 : Cytoplasmic	4.3.A.1.a : ATP binding component ;						no	8169203, 9495773		7 : Transport and binding proteins ;
CmetNA4v1_20302	CDS	-2	481667	482578	912	automatic/finished	no	nasE	RS03348	NITRATE ABC TRANSPORTER, TRANSMEMBRANE component	2b : Function from indirect experimental evidences (e.g. phenotypes)	t : transporter	11 : Membrane	4.3.A.1.m : membrane component ;						no	8169203, 9495773		7 : Transport and binding proteins ;
CmetNA4v1_20303	CDS	-3	482647	483951	1305	automatic/finished	no	nasF	RS03349	NITRATE ABC TRANSPORTER, periplasmic component	2b : Function from indirect experimental evidences (e.g. phenotypes)	t : transporter	9 : Periplasmic	4.3.A.1.p : periplasmic binding component ;						no	8169203, 9495773		7 : Transport and binding proteins ;
CmetNA4v1_20304	CDS	-3	484315	484950	636	automatic/finished	no	nasR		response regulator antiterminator transcriptional regulator, RNA-binding ANTAR domain	2b : Function from indirect experimental evidences (e.g. phenotypes)	r : regulator	2 : Cytoplasmic	3.1.2 : Transcriptional level ; 3.3.1 : Operon (regulation of one operon) ;						no	8169203, 9495773		12.1 : DNA interactions ;
CmetNA4v1_20305	CDS		485125	485826	702	automatic/finished	no			putative isomerase/hydrolase; putative Fumarylacetoacetate (FAA) hydrolase	3 : Putative function from multiple computational evidences	e : enzyme	1 : Unknown	1.1.1 : Carbohydrates/Carbon compounds ;	3.7.1.2, 5.3.3.-, 4.1.1.-	FUMARYLACETOACETASE-RXN	TYRFUMCAT-PWY			no			6 : Energy metabolism ;
CmetNA4v1_20306	CDS		485831	486478	648	automatic/finished	no			putative MALEYLACETOACETATE ISOMERASE	3 : Putative function from multiple computational evidences	e : enzyme	1 : Unknown	1 : Metabolism ;	5.2.1.2	MALEYLACETOACETATE-ISOMERASE-RXN	TYRFUMCAT-PWY			no			18.1 : Enzymes of unknown specificity ;
CmetNA4v1_20307	CDS	-3	486550	487812	1263	automatic/finished	no	ftsY		Signal recognition particle GTPase	2b : Function from indirect experimental evidences (e.g. phenotypes)	cp : cell process	1 : Unknown	4.3.A.5 : The Type II (General) Secretory Pathway (IISP) Family ;		3.6.5.4-RXN				no			7 : Transport and binding proteins ;
CmetNA4v1_20308	CDS		487563	487808	246	automatic/finished	no			protein of unknown function	5 : Unknown function	u : unknown	1 : Unknown							no
CmetNA4v1_20309	CDS		487873	489387	1515	automatic/finished	no			putative ZINC PROTEASE, peptidase M16 family	3 : Putative function from multiple computational evidences	e : enzyme	1 : Unknown		3.4.24.-					no
CmetNA4v1_20310	CDS		489396	490760	1365	automatic/finished	no			putative ZINC PROTEASE, peptidase M16 family	3 : Putative function from multiple computational evidences	e : enzyme	1 : Unknown		3.4.24.-					no
CmetNA4v1_20311	CDS		490869	491501	633	automatic/finished	no			conserved hypothetical protein, putative methyltransferase	4 : Unknown function but conserved in other organisms	u : unknown	1 : Unknown							no			18 : Unknown function ;
CmetNA4v1_20312	CDS		491713	492198	486	automatic/finished	no	coaD	yicA, kdtB	CMP-deoxy-D-manno-octulosonate-lipid A transferase (phosphopantetheine adenylyltransferase)	2b : Function from indirect experimental evidences (e.g. phenotypes)	e : enzyme	1 : Unknown	1.5.3.5 : Coenzyme A ; 6.3 : Surface antigens (ECA, O antigen of LPS) ;	2.7.7.3	PANTEPADENYLYLTRAN-RXN	COA-PWY			no			4.7 : Pantothenate and coenzyme A ; 14.3 : Biosynthesis and degradation of surface polysaccharides and lipopolysaccharides ;
CmetNA4v1_20313	CDS		492265	492525	261	automatic/finished	no			putative 4Fe-4S ferredoxin-type protein	3 : Putative function from multiple computational evidences	c : carrier	1 : Unknown	1.4.3 : Electron carrier ;						no			6.5 : Electron transport ;
CmetNA4v1_20314	CDS	-3	492649	493245	597	automatic/finished	no	pth	rap, asuA?	peptidyl-tRNA hydrolase	2a : Function from experimental evidences in other organisms	e : enzyme	2 : Cytoplasmic	2.3.1 : Amino acid-activation ; 7.1 : Cytoplasm ;	3.1.1.29	AMINOCYL-TRNA-HYDROLASE-RXN				no			10.1 : tRNA aminoacylation ;
CmetNA4v1_20315	CDS	-3	493420	494031	612	automatic/finished	no	rplY	RS03362	5S rRNA binding 50S RIBOSOMAL SUBUNIT PROTEIN L25	2a : Function from experimental evidences in other organisms	s : structure	2 : Cytoplasmic	2.3.2 : Translation ; 2.3.8 : Ribosomal proteins ; 6.6 : Ribosome ;						no	2034228		10.2 : Ribosomal proteins: synthesis and modification ; 10.4 : Translation factors ;
CmetNA4v1_20316	CDS	-1	494202	495155	954	automatic/finished	no	prs	prsA, dnaR	phosphoribosylpyrophosphate synthetase	2a : Function from experimental evidences in other organisms	e : enzyme	1 : Unknown	1.5.2.3 : Purine ribonucleotide biosynthesis ;	2.7.6.1	PRPPSYN-RXN	PWY0-662			no			2.3 : Purine ribonucleotide biosynthesis ;
CmetNA4v1_tRNA61	tRNA	-1	495251	495327	77	automatic/finished	no			Gln tRNA												tRNA Gln anticodon TTG, Cove score 76.49
CmetNA4v1_20317	CDS	-2	495395	496273	879	automatic/finished	no	ispE		4-diphosphocytidyl-2-C-methyl-D-erythritol kinase					2.7.1.148	2.7.1.148-RXN	NONMEVIPP-PWY			no
CmetNA4v1_20318	CDS	-3	496270	496884	615	automatic/finished	no	lolB		Outer-membrane lipoprotein lolB										no
CmetNA4v1_20319	CDS	-2	496970	498997	2028	automatic/finished	no			conserved hypothetical protein; putative exported protein	4 : Unknown function but conserved in other organisms	u : unknown	1 : Unknown							no			18 : Unknown function ;
CmetNA4v1_20320	CDS		499148	500041	894	automatic/finished	no	mutM	fpg	formamidopyrimidine/5-formyluracil/ 5-hydroxymethyluracil DNA glycosylase/ DNA lyase	2a : Function from experimental evidences in other organisms	e : enzyme	2 : Cytoplasmic	2.1.4 : DNA repair ; 7.1 : Cytoplasm ;	3.2.2.23, 4.2.99.18	RXN0-2602				no			8.1 : DNA replication, recombination, and repair ;
CmetNA4v1_20321	CDS		500374	502317	1944	automatic/finished	no			conserved hypothetical protein; putative nucleoside triphosphate hydrolase domain	4 : Unknown function but conserved in other organisms	u : unknown	1 : Unknown							no			18 : Unknown function ;
CmetNA4v1_20322	CDS		502448	503599	1152	automatic/finished	no	mutY	micA, mutB (S.t.)	adenine DNA glycosylase	2a : Function from experimental evidences in other organisms	e : enzyme	2 : Cytoplasmic	2.1.4 : DNA repair ; 7.1 : Cytoplasm ;	3.2.2.-	RXN0-2661				no	2197596		8.1 : DNA replication, recombination, and repair ;
CmetNA4v1_20323	CDS	-2	503621	504274	654	automatic/finished	no			putative peptidase, S16 family	3 : Putative function from multiple computational evidences	e : enzyme	1 : Unknown							no
CmetNA4v1_20324	CDS	-1	504321	505211	891	automatic/finished	no			conserved hypothetical protein; putative P-loop ATPase	4 : Unknown function but conserved in other organisms	u : unknown	1 : Unknown							no			18 : Unknown function ;
CmetNA4v1_20325	CDS	-1	505326	505667	342	automatic/finished	no			conserved exported protein of unknown function	4 : Unknown function but conserved in other organisms	u : unknown	1 : Unknown							no
CmetNA4v1_20326	CDS	-3	505873	506844	972	automatic/finished	no	ptsK	RS03373	HPr serine kinase/phosphorylase	2b : Function from indirect experimental evidences (e.g. phenotypes)	e : enzyme	1 : Unknown	1.1.1 : Carbohydrates/Carbon compounds ; 3.1.3.2 : Covalent modification, demodification, maturation ; 4.9.B : Putative uncharacterized transport protein ;	2.7.1.-, 3.1.3.-					no			6 : Energy metabolism ; 7 : Transport and binding proteins ; 12.3 : Protein interactions ;
CmetNA4v1_20327	CDS	-1	506913	507368	456	automatic/finished	no	ptsN	yhbI, rpoP	Phosphoenolpyruvate-dependent sugar phosphotransferase system (PTS), EIIA 2 component	2a : Function from experimental evidences in other organisms	t : transporter	2 : Cytoplasmic	4.9.B : Putative uncharacterized transport protein ;						no			7 : Transport and binding proteins ;
CmetNA4v1_20328	CDS	-2	507845	508198	354	automatic/finished	no	yhbH		sigma(54) modulation protein	2b : Function from indirect experimental evidences (e.g. phenotypes)	f : factor	2 : Cytoplasmic	2.2.2 : Transcription related ; 3.1.2.1 : Sigma factors, anti-sigmafactors ;						no			9 : Transcription ; 12.1 : DNA interactions ;
CmetNA4v1_20329	CDS	-3	508249	509727	1479	automatic/finished	no	rpoN	ntrA	sigma N (sigma 54) factor of RNA polymerase	2a : Function from experimental evidences in other organisms	f : factor	1 : Unknown	3.1.2.1 : Sigma factors, anti-sigmafactors ;						no			12.1 : DNA interactions ;
CmetNA4v1_20330	CDS	-3	509851	510642	792	automatic/finished	no			putative ABC transport protein, atp_binding component	3 : Putative function from multiple computational evidences	t : transporter	2 : Cytoplasmic	4.3.A.1.a : ATP binding component ; 7.1 : Cytoplasm ;						no			7 : Transport and binding proteins ;
CmetNA4v1_20331	CDS	-2	510668	511312	645	automatic/finished	no			conserved hypothetical protein, OstA domain; putative exported PROTEIN	4 : Unknown function but conserved in other organisms	u : unknown	1 : Unknown							no			18 : Unknown function ;
CmetNA4v1_20332	CDS	-3	511375	512001	627	automatic/finished	no			conserved hypothetical protein, DUF1239; putative TRANSMEMBRANE PROTEIN	4 : Unknown function but conserved in other organisms	u : unknown	1 : Unknown							no			18 : Unknown function ;
CmetNA4v1_20333	CDS	-3	512005	512988	984	automatic/finished	no	kdsD	yrbH	Arabinose-5-phosphate isomerase	2a : Function from experimental evidences in other organisms	e : enzyme	1 : Unknown	3.1.4 : Regulation level unknown ; 6.7 : Capsule (M and K antigens) ;	5.3.1.13	DARAB5PISOM-RXN	PWY-1269$KDO-NAGLIPASYN-PWY			no	12805358		12 : Regulatory functions ; 14.3 : Biosynthesis and degradation of surface polysaccharides and lipopolysaccharides ;
CmetNA4v1_20334	CDS		513094	515118	2025	automatic/finished	no			GLUTATHIONE-REGULATED POTASSIUM-EFFLUX SYSTEM Kﱿ ANTIPORTER TRANSMEMBRANE PROTEIN	2b : Function from indirect experimental evidences (e.g. phenotypes)	t : transporter	5 : Inner membrane protein	4.2.A.37 : The Monovalent Cation:Proton Antiporter-2 (CPA2) Family ;						no			7 : Transport and binding proteins ;
CmetNA4v1_20335	CDS	-2	515108	515536	429	automatic/finished	no			conserved hypothetical protein	4 : Unknown function but conserved in other organisms	u : unknown	1 : Unknown							no			18 : Unknown function ;
CmetNA4v1_20336	CDS	-1	515595	516173	579	automatic/finished	no			conserved hypothetical protein; putative peptidase, type 1 glutamine amidotransferase (GATase1)-like domain	4 : Unknown function but conserved in other organisms	u : unknown	2 : Cytoplasmic							no			18 : Unknown function ;
CmetNA4v1_20337	CDS		516300	516872	573	automatic/finished	no	apt		adenine phosphoribosyltransferase	2a : Function from experimental evidences in other organisms	e : enzyme	2 : Cytoplasmic	1.7.33 : Nucleotide and nucleoside conversions ; 7.1 : Cytoplasm ;	2.4.2.7	ADENPRIBOSYLTRAN-RXN	P1-PWY			no			2.2 : Nucleotide and nucleoside interconversions ;
CmetNA4v1_20338	CDS		517152	518828	1677	automatic/finished	no			putative transport protein (PNaS family)/regulator/enzyme	3 : Putative function from multiple computational evidences	t : transporter	11 : Membrane	4.2.A.58 : The Phosphate:Na Symporter (PNaS) Family ;						no			7 : Transport and binding proteins ;
CmetNA4v1_20339	CDS	-2	518882	521749	2868	automatic/finished	no	uvrA	dar	ATPase and DNA damage recognition protein of nucleotide excision repair excinuclease UvrABC	2a : Function from experimental evidences in other organisms	e : enzyme	2 : Cytoplasmic	2.1.4 : DNA repair ; 5.6.1 : Radiation ; 5.8 : SOS response ; 7.1 : Cytoplasm ;		RXN0-2621				no	11421287, 16829526		8.1 : DNA replication, recombination, and repair ; 15.5 : Detoxification ; 15.10 : Adaptations to atypical conditions ;
CmetNA4v1_20340	CDS		522024	523280	1257	automatic/finished	no			putative transporter, MFS family	3 : Putative function from multiple computational evidences	t : transporter	5 : Inner membrane protein	4.2.A.1 : The Major Facilitator Superfamily (MFS) ;						no			7 : Transport and binding proteins ;
CmetNA4v1_20341	CDS		523556	524098	543	automatic/finished	no	ssb	exrB, lexC	ssDNA-binding protein, controls activity of RecBCD nuclease	2a : Function from experimental evidences in other organisms	f : factor	2 : Cytoplasmic	2.1.3 : DNA recombination ; 5.8 : SOS response ; 7.1 : Cytoplasm ;						no	9735287		8.1 : DNA replication, recombination, and repair ; 15.10 : Adaptations to atypical conditions ;
CmetNA4v1_30001	CDS		524434	525300	867	automatic/finished	no			conserved protein of unknown function	4 : Unknown function but conserved in other organisms	u : unknown	1 : Unknown							no
CmetNA4v1_30002	CDS		525488	526684	1197	automatic/finished	no	int		Tyrosine-based site-specific recombinase CMGI-7										no
CmetNA4v1_30003	CDS		526681	528321	1641	automatic/finished	no			putative Predicted protein	3 : Putative function from multiple computational evidences									no
CmetNA4v1_30004	CDS		528326	530329	2004	automatic/finished	no			putative integrase	3 : Putative function from multiple computational evidences									no
CmetNA4v1_30005	CDS		530286	530708	423	automatic/finished	no			conserved protein of unknown function	4 : Unknown function but conserved in other organisms	u : unknown	1 : Unknown							no
CmetNA4v1_30006	CDS		530721	530957	237	automatic/finished	no			conserved protein of unknown function	4 : Unknown function but conserved in other organisms	u : unknown	1 : Unknown							no
CmetNA4v1_30007	CDS	-1	531150	531902	753	automatic/finished	no			conserved protein of unknown function	4 : Unknown function but conserved in other organisms	u : unknown	1 : Unknown							no
CmetNA4v1_30008	CDS		531673	531927	255	automatic/finished	no			protein of unknown function	5 : Unknown function	u : unknown	1 : Unknown							no
CmetNA4v1_40001	CDS	-2	532565	533758	1194	automatic/finished	no	arsP		Permease of the Major Facilitator Family										no
CmetNA4v1_40002	CDS	-2	533777	534541	765	automatic/finished	no	arsH		NADPH-dependent FMN reductase (ArsH-like protein)										no
CmetNA4v1_40003	CDS	-3	534538	534960	423	automatic/finished	no	arsC		Arsenate reductase					1.20.4.1	RXN-982	PWY-4621			no
CmetNA4v1_40004	CDS	-3	534970	536034	1065	automatic/finished	no	arsB		Arsenite resistance protein	2a : Function from experimental evidences in other organisms	m : membrane component	11 : Membrane	5.6.2 : Detoxification (xenobiotic metabolism) ; 4.2.A. : Porters (Uni-, Sym- and Antiporters) ;						no			7 : Transport and binding proteins ; 15.5 : Detoxification ;
CmetNA4v1_40005	CDS	-1	536031	536543	513	automatic/finished	no	arsC		Arsenate reductase (Thioredoxin family)					3.1.3.48	PROTEIN-TYROSINE-PHOSPHATASE-RXN$RXN-982$RXN-7002	PWY-4621			no
CmetNA4v1_40006	CDS	-2	536609	537097	489	automatic/finished	no			putative glyoxalase/bleomycin resistance protein/dioxygenase	3 : Putative function from multiple computational evidences	e : enzyme	2 : Cytoplasmic	1.7 : Central intermediary metabolism ; 5.6.4 : Drug resistance/sensitivity ;						no			5 : Central intermediary metabolism ; 15.8 : Toxin production and resistance ;
CmetNA4v1_40007	CDS	-2	537101	537430	330	automatic/finished	no			putative transcriptional regulator, ArsR domain	3 : Putative function from multiple computational evidences	r : regulator	2 : Cytoplasmic	3.1.2 : Transcriptional level ;						no			12.1 : DNA interactions ;
CmetNA4v1_40008	CDS	-1	537624	538442	819	automatic/finished	no	arsM		S-adenosyl-L-methionine-dependent methyltransferase					2.1.1.-					no
CmetNA4v1_40009	CDS	-3	538672	540171	1500	automatic/finished	no			putative soluble Lytic transglycosylase	3 : Putative function from multiple computational evidences	e : enzyme	1 : Unknown	1.2 : Macromolecule degradation ;						no
CmetNA4v1_40010	CDS	-3	540355	541161	807	automatic/finished	no			putative TRANSCRIPTION REGULATOR PROTEIN, iclR domain	3 : Putative function from multiple computational evidences	r : regulator	2 : Cytoplasmic	3.1.2 : Transcriptional level ;						no			12.1 : DNA interactions ;
CmetNA4v1_40011	CDS	-1	541158	541943	786	automatic/finished	no			putative TRANSCRIPTION REGULATOR PROTEIN, iclR domain	3 : Putative function from multiple computational evidences	r : regulator	2 : Cytoplasmic	3.1.2 : Transcriptional level ;						no			12.1 : DNA interactions ;
CmetNA4v1_40012	CDS		542161	543120	960	automatic/finished	no			putative Metallo-hydrolase/oxidoreductase, Beta-lactamase	3 : Putative function from multiple computational evidences	e : enzyme	1 : Unknown		3.5.2.6	BETA-LACTAMASE-RXN				no
CmetNA4v1_40013	CDS		543224	544978	1755	automatic/finished	no			putative monooxygenase, FAD-binding:FAD dependent oxidoreductase	3 : Putative function from multiple computational evidences	e : enzyme	1 : Unknown	1 : Metabolism ;	1.14.13.-					no			18.1 : Enzymes of unknown specificity ;
CmetNA4v1_40014	CDS		545004	545213	210	automatic/finished	no			conserved protein of unknown function	4 : Unknown function but conserved in other organisms	u : unknown	1 : Unknown							no
CmetNA4v1_40015	CDS		545297	546658	1362	automatic/finished	no			putative PERMEASE TRANSMEMBRANE PROTEIN	3 : Putative function from multiple computational evidences	t : transporter	11 : Membrane	4.2.A.1 : The Major Facilitator Superfamily (MFS) ;						no			7 : Transport and binding proteins ;
CmetNA4v1_40016	CDS		546803	547711	909	automatic/finished	no	gltI		Glutamate/aspartate periplasmic-binding protein										no
CmetNA4v1_40017	CDS	-2	547724	548620	897	automatic/finished	no			putative transcriptional regulator, RpiR and Sugar isomerase (SIS) domains	3 : Putative function from multiple computational evidences	r : regulator	1 : Unknown	3.1.2 : Transcriptional level ;						no			12.1 : DNA interactions ;
CmetNA4v1_40018	CDS		548824	550149	1326	automatic/finished	no			putative aminotransferase, pyridoxal-phosphate-dependent aminotransferase family	3 : Putative function from multiple computational evidences	e : enzyme	2 : Cytoplasmic	1 : Metabolism ;	2.6.1.-					no			18.1 : Enzymes of unknown specificity ;
CmetNA4v1_40019	CDS		550146	551030	885	automatic/finished	no			conserved protein of unknown function	4 : Unknown function but conserved in other organisms	u : unknown	1 : Unknown							no
CmetNA4v1_40020	CDS		551111	552310	1200	automatic/finished	no			Aminotransferase, class I and II					2.6.1.-					no
CmetNA4v1_40021	CDS	-3	552382	553848	1467	automatic/finished	no			putative Outer membrane efflux protein	3 : Putative function from multiple computational evidences	t : transporter	7 : Outer membrane protein	4.2.A.6 : The Resistance-Nodulation-Cell Division (RND) Superfamily ;						no			7 : Transport and binding proteins ;
CmetNA4v1_40022	CDS	-3	553861	555015	1155	automatic/finished	no			putative ABC-2 transporter, membrane ATP binding component	3 : Putative function from multiple computational evidences	t : transporter	5 : Inner membrane protein	4.3.A.1.am : ATP binding and membrane component ;						no			7 : Transport and binding proteins ;
CmetNA4v1_40023	CDS	-1	555012	555998	987	automatic/finished	no			putative ABC TRANSPORTER, ATP-BINDING component	3 : Putative function from multiple computational evidences	t : transporter	2 : Cytoplasmic	4.3.A.1.a : ATP binding component ;						no			7 : Transport and binding proteins ;
CmetNA4v1_40024	CDS	-2	555995	556957	963	automatic/finished	no			putative biotinyl/lipoyl-carrier protein	3 : Putative function from multiple computational evidences	c : carrier	1 : Unknown	1.6.15.4 : Acyl carrier protein ;						no			3.1 : Biosynthesis ;
CmetNA4v1_40025	CDS	-3	556975	557667	693	automatic/finished	no			putative transcriptional regulator, tetR family	3 : Putative function from multiple computational evidences	r : regulator	2 : Cytoplasmic	3.1.2 : Transcriptional level ;						no			12.1 : DNA interactions ;
CmetNA4v1_40026	CDS		557869	559275	1407	automatic/finished	no			conserved hypothetical protein; putative exported protein	4 : Unknown function but conserved in other organisms	u : unknown	1 : Unknown							no			18 : Unknown function ;
CmetNA4v1_40027	CDS	-3	559288	560121	834	automatic/finished	no	queF		7-cyano-7-deazaguanine reductase	2b : Function from indirect experimental evidences (e.g. phenotypes)	e : enzyme	2 : Cytoplasmic	1.5.2 : Nucleotide ; 2.2.5 : tRNA ;	1.7.1.13	RXN0-4022	PWY-6700			no			2 : Purines, pyrimidines, nucleosides, and nucleotides ; 10 : Protein synthesis ;
CmetNA4v1_40028	CDS	-1	560133	561668	1536	automatic/finished	no	ilvA		threonine deaminase	2a : Function from experimental evidences in other organisms	e : enzyme	1 : Unknown	1.5.1.18 : Isoleucine/valine ;	4.3.1.19	THREDEHYD-RXN	ILEUSYN-PWY			no			1.4 : Pyruvate family ;
CmetNA4v1_40029	CDS		561862	562662	801	automatic/finished	no	otsB	otsP	trehalose-6-phosphate phosphatase	2b : Function from indirect experimental evidences (e.g. phenotypes)	e : enzyme	2 : Cytoplasmic	1.7.9 : Misc. glucose metabolism ;	3.1.3.12	TREHALOSEPHOSPHA-RXN	TRESYN-PWY			no			6.11 : Sugars ;
CmetNA4v1_40030	CDS		562554	564521	1968	automatic/finished	no			putative Glycoside hydrolase, family 15	3 : Putative function from multiple computational evidences	e : enzyme	1 : Unknown	1.6.9 : Polysaccharides, cytoplasmic ;						no			6.14 : Biosynthesis and degradation of polysaccharides ;
CmetNA4v1_40031	CDS		564553	565947	1395	automatic/finished	no	otsA	pexA	trehalose-6-phosphate synthase	2b : Function from indirect experimental evidences (e.g. phenotypes)	e : enzyme	1 : Unknown	1.7.9 : Misc. glucose metabolism ;	2.4.1.15	TREHALOSE6PSYN-RXN	TRESYN-PWY			no			6.11 : Sugars ;
CmetNA4v1_40032	CDS	-2	565994	566590	597	automatic/finished	no			conserved hypothetical protein	4 : Unknown function but conserved in other organisms	u : unknown	1 : Unknown							no			18 : Unknown function ;
CmetNA4v1_40033	CDS	-3	566587	567633	1047	automatic/finished	no	coxI		carbon monoxide dehydrogenase accessory protein; may be involved in the anchoring of CO dehydrogenase to the cytoplasmic membrane	2b : Function from indirect experimental evidences (e.g. phenotypes)	f : factor	1 : Unknown	1.1 : Carbon compound utilization ;						no	14644498		6 : Energy metabolism ;
CmetNA4v1_40034	CDS	-1	567606	568175	570	automatic/finished	no	coxG		carbon monoxide dehydrogenase accessory protein; may be involved in the anchoring of CO dehydrogenase to the cytoplasmic membrane	2b : Function from indirect experimental evidences (e.g. phenotypes)	f : factor	1 : Unknown	1.1 : Carbon compound utilization ;						no	14644498		6 : Energy metabolism ;
CmetNA4v1_40035	CDS	-2	568166	569452	1287	automatic/finished	no	coxE		carbon monoxide dehydrogenase accessory protein; may be involved in the addition of the Cu-ion to CoxL	2b : Function from indirect experimental evidences (e.g. phenotypes)	f : factor	1 : Unknown	1.1 : Carbon compound utilization ; 2.3.3 : Posttranslational modification ;						no			6 : Energy metabolism ; 11.2 : Protein modification and repair ;
CmetNA4v1_40036	CDS	-3	569455	570351	897	automatic/finished	no	coxD		carbon monoxide dehydrogenase accessory protein, putative ATPase; may be involved in the attachment of the sulfido group to the Mo-ion to CoxL	2b : Function from indirect experimental evidences (e.g. phenotypes)	e : enzyme	1 : Unknown	1.1 : Carbon compound utilization ; 2.3.3 : Posttranslational modification ;						no	14644498		6 : Energy metabolism ; 11.2 : Protein modification and repair ;
CmetNA4v1_40037	CDS	-2	570428	571228	801	automatic/finished	no	cooxM		Carbon monoxide dehydrogenase medium chain (CO dehydrogenase subunit M) (CO-DH M)	2a : Function from experimental evidences in other organisms	e : enzyme	2 : Cytoplasmic	1.1 : Carbon compound utilization ;	1.2.99.2	1.2.7.4-RXN	PWY-6142$CODH-PWY			no	10430865, 2818128		6 : Energy metabolism ;
CmetNA4v1_40038	CDS	-1	571245	573623	2379	automatic/finished	no	coxL		Carbon monoxide dehydrogenase large chain (CO dehydrogenase subunit L) (CO-DH L)	2a : Function from experimental evidences in other organisms	e : enzyme	2 : Cytoplasmic	1.1 : Carbon compound utilization ;	1.2.99.2	1.2.7.4-RXN	PWY-6142$CODH-PWY			no	10430865, 2818128		6 : Energy metabolism ;
CmetNA4v1_40039	CDS	-2	573635	574129	495	automatic/finished	no	coxS		Carbon monoxide dehydrogenase small chain (CO dehydrogenase subunit S) (CO-DH S)	2a : Function from experimental evidences in other organisms	e : enzyme	2 : Cytoplasmic	1.1 : Carbon compound utilization ;	1.2.99.2	1.2.7.4-RXN	PWY-6142$CODH-PWY			no	10430865, 2818128		6 : Energy metabolism ;
CmetNA4v1_40040	CDS		574379	574957	579	automatic/finished	no			conserved hypothetical protein; putative TRANSMEMBRANE PROTEIN	4 : Unknown function but conserved in other organisms	u : unknown	11 : Membrane							no			18 : Unknown function ;
CmetNA4v1_40041	CDS		575127	579101	3975	automatic/finished	no			putative FAD/FMN binding Fe-S oxidoreductase	3 : Putative function from multiple computational evidences	e : enzyme	1 : Unknown	1.4 : Energy production/transport ;	1.-.-.-					no			6.5 : Electron transport ;
CmetNA4v1_40042	CDS		579180	579614	435	automatic/finished	no			conserved hypothetical protein; putative nucleotide-binding protein, histidine triad motif	4 : Unknown function but conserved in other organisms	u : unknown	1 : Unknown							no			18 : Unknown function ;
CmetNA4v1_40043	CDS		579765	581675	1911	automatic/finished	no			putative ABC TRANSPORTER, ATP-binding membrane component	3 : Putative function from multiple computational evidences	t : transporter	11 : Membrane	4.3.A.1.am : ATP binding and membrane component ;						no			7 : Transport and binding proteins ;
CmetNA4v1_40044	CDS		581746	582162	417	automatic/finished	no			conserved hypothetical protein, DUF971	4 : Unknown function but conserved in other organisms	u : unknown	1 : Unknown							no			18 : Unknown function ;
CmetNA4v1_40045	CDS		582198	582929	732	automatic/finished	no	ubiE	yigO	bifunctional: 2-octaprenyl-6-methoxy-1,4-benzoquinone methylase; S-adenosylmethionine:2-DMK methyltransferase	2a : Function from experimental evidences in other organisms	e : enzyme	1 : Unknown	1.3.6 : Aerobic respiration ; 1.3.7 : Anaerobic respiration ; 1.5.3.11 : Menaquinone (MK), ubiquinone (Q) ;	2.1.1.-	ADOMET-DMK-METHYLTRANSFER-RXN$2-OCTAPRENYL-METHOXY-BENZOQ-METH-RXN	MENAQUINONESYN-PWY$PWY-6708			no	9045837		4.5 : Menaquinone and ubiquinone ; 6.1 : Aerobic ; 6.3 : Anaerobic ;
CmetNA4v1_40046	CDS		582992	583981	990	automatic/finished	no			conserved hypothetical protein, COG4395	4 : Unknown function but conserved in other organisms	u : unknown	1 : Unknown							no			18 : Unknown function ;
CmetNA4v1_40047	CDS		584102	584773	672	automatic/finished	no			conserved hypothetical protein, DUF1243	4 : Unknown function but conserved in other organisms	u : unknown	1 : Unknown							no			18 : Unknown function ;
CmetNA4v1_40048	CDS		584815	586392	1578	automatic/finished	no	ubiB	aarF, yigR, yigQ, yigS	2-octaprenylphenol hydroxylase of ubiquinone biosynthetic pathway	2a : Function from experimental evidences in other organisms	e : enzyme	1 : Unknown	1.3.6 : Aerobic respiration ; 1.5.3.11 : Menaquinone (MK), ubiquinone (Q) ;		2-OCTAPRENYLPHENOL-HYDROX-RXN	PWY-6708			no	10960098		4.5 : Menaquinone and ubiquinone ; 6.1 : Aerobic ;
CmetNA4v1_40049	CDS		586727	588163	1437	automatic/finished	no			putative SODIUM/SOLUTE SYMPORTER	3 : Putative function from multiple computational evidences	t : transporter	11 : Membrane	4.2.A.21 : The Solute:Sodium Symporter (SSS) Family ;						no			7 : Transport and binding proteins ;
CmetNA4v1_40050	CDS		588387	588716	330	automatic/finished	no			conserved hypothetical protein	4 : Unknown function but conserved in other organisms	u : unknown	1 : Unknown							no			18 : Unknown function ;
CmetNA4v1_40051	CDS		588689	589438	750	automatic/finished	no			conserved hypothetical protein, DUF502; putative TRANSMEMBRANE PROTEIN	4 : Unknown function but conserved in other organisms	u : unknown	1 : Unknown							no			18 : Unknown function ;
CmetNA4v1_40052	CDS		589487	591295	1809	automatic/finished	no	aspS	tls	aspartate tRNA synthetase	2a : Function from experimental evidences in other organisms	e : enzyme	2 : Cytoplasmic	2.3.1 : Amino acid-activation ; 7.1 : Cytoplasm ;	6.1.1.12	ASPARTATE--TRNA-LIGASE-RXN	TRNA-CHARGING-PWY			no			10.1 : tRNA aminoacylation ;
CmetNA4v1_40053	CDS		591474	592409	936	automatic/finished	no			conserved hypothetical protein; putative TRANSMEMBRANE PROTEIN	4 : Unknown function but conserved in other organisms	u : unknown	1 : Unknown							no			18 : Unknown function ;
CmetNA4v1_40054	CDS		592456	592977	522	automatic/finished	no	nudB	ntpA, yebD	dATP pyrophosphohydrolase	2a : Function from experimental evidences in other organisms	e : enzyme	1 : Unknown	1.7.33 : Nucleotide and nucleoside conversions ;	3.6.1.-	RXN0-384$H2NEOPTERINP3PYROPHOSPHOHYDRO-RXN	PWY-6147			no			2.2 : Nucleotide and nucleoside interconversions ;
CmetNA4v1_40055	CDS		592974	593729	756	automatic/finished	no			putative metal dependent endonuclease/phosphatase	3 : Putative function from multiple computational evidences	e : enzyme	2 : Cytoplasmic	2 : Information transfer ;						no
CmetNA4v1_40056	CDS	-3	593746	594279	534	automatic/finished	no	mobB	RS04880	MOLYBDOPTERIN-GUANINE DINUCLEOTIDE BIOSYNTHESIS PROTEIN B	2b : Function from indirect experimental evidences (e.g. phenotypes)	f : factor	1 : Unknown	1.5.3.4 : Molybdenum (molybdopterin) ;		RXN0-262	PWY-5964			no			4.6 : Molybdopterin ;
CmetNA4v1_40057	CDS		594349	595698	1350	automatic/finished	no			putative cardiolipin synthase; putative exported protein	3 : Putative function from multiple computational evidences	e : enzyme	1 : Unknown	1 : Metabolism ; 6.1 : Membrane ; 1.6.1 : Phospholipid ;	2.7.8.-					no			18.1 : Enzymes of unknown specificity ;
CmetNA4v1_40058	CDS		596033	596671	639	automatic/finished	no			putative transcriptional regulator, tetR family	3 : Putative function from multiple computational evidences	r : regulator	2 : Cytoplasmic	3.1.2 : Transcriptional level ;						no			12.1 : DNA interactions ;
CmetNA4v1_40059	CDS		596762	598549	1788	automatic/finished	no			putative ACYL-COA DEHYDROGENASE OXIDOREDUCTASE	3 : Putative function from multiple computational evidences	e : enzyme	1 : Unknown	1.4 : Energy production/transport ;	1.3.99.3	LONG-CHAIN-ACYL-COA-DEHYDROGENASE-RXN				no			6.5 : Electron transport ;
CmetNA4v1_40060	CDS		598663	601089	2427	automatic/finished	no			putative 3-HYDROXYACYL-COA DEHYDROGENASE OXIDOREDUCTASE	3 : Putative function from multiple computational evidences	e : enzyme	1 : Unknown	1.4 : Energy production/transport ;	1.1.1.35	RXN-12750$RXN-12709$RXN-12705$RXN-12570$RXN0-2044$RXN-11662$RXN-11245$RXN-10703$RXN-10702$RXN-10698$OHACYL-COA-DEHYDROG-RXN	PWY-6944$PWY-6948$PWY-6945$PWY-6946$PWY0-321$PWY-5177$CENTFERM-PWY$FAO-PWY			no			6.5 : Electron transport ;
CmetNA4v1_40061	CDS		601114	602310	1197	automatic/finished	no			putative 3-ketoacyl-CoA thiolase	3 : Putative function from multiple computational evidences	e : enzyme	1 : Unknown	1 : Metabolism ;	2.3.1.16	RXN-9950$RXN-9850$RXN-12710$RXN0-6512$RXN-11246$RXN-10701$RXN-10700$RXN-10699$KETOACYLCOATHIOL-RXN$RXN-1305$RXN-2006	PWY-6948$PWY-6945$PWY-6946$PWY0-321$FAO-PWY$PWY-481$PWY-6458			no			18.1 : Enzymes of unknown specificity ;
CmetNA4v1_40062	CDS		602424	603380	957	automatic/finished	no			conserved hypothetical protein, DegV family	4 : Unknown function but conserved in other organisms	u : unknown	1 : Unknown							no			18 : Unknown function ;
CmetNA4v1_40063	CDS		603415	604191	777	automatic/finished	no			putative ENOYL-COA HYDRATASE	3 : Putative function from multiple computational evidences	e : enzyme	1 : Unknown		4.2.1.17	TIGLYLCOA-HYDROXY-RXN$RXN0-6513$ENOYL-COA-HYDRAT-RXN$RXN-11244$RXN-10705$RXN-10704$RXN-10697$RXN-7838$METHYLACYLYLCOA-HYDROXY-RXN$RXN-11667$RXN-902$RXN0-5393	ILEUDEG-PWY$PWY0-321$FAO-PWY$VALDEG-PWY$PWY-5177$CENTFERM-PWY$PWY0-1337			no
CmetNA4v1_40064	CDS	-3	604273	604746	474	automatic/finished	no			putative Acyl-CoA thioester hydrolase	3 : Putative function from multiple computational evidences	e : enzyme	1 : Unknown		3.1.2.-	PALMITOYL-COA-HYDROLASE-RXN				no
CmetNA4v1_40065	CDS		604765	606657	1893	automatic/finished	no			putative ABC transport system, ATPase membrane component	3 : Putative function from multiple computational evidences	t : transporter	11 : Membrane	4.3.A.1.am : ATP binding and membrane component ;						no			7 : Transport and binding proteins ;
CmetNA4v1_40066	CDS		606840	607898	1059	automatic/finished	no			putative precursor ABC-type nitrate/sulfonate/bicarbonate transport system, periplasmic component	3 : Putative function from multiple computational evidences	t : transporter	9 : Periplasmic	4.3.A.1.p : periplasmic binding component ;						no			7 : Transport and binding proteins ;
CmetNA4v1_40067	CDS		607895	608740	846	automatic/finished	no			putative ABC TRANSPORTER, ATP-BINDING component	3 : Putative function from multiple computational evidences	t : transporter	2 : Cytoplasmic	4.3.A.1.a : ATP binding component ;						no			7 : Transport and binding proteins ;
CmetNA4v1_40068	CDS		608737	609516	780	automatic/finished	no			putative ABC transport system, inner membrane component	3 : Putative function from multiple computational evidences	t : transporter	5 : Inner membrane protein	4.3.A.1.m : membrane component ;						no			7 : Transport and binding proteins ;
CmetNA4v1_40069	CDS	-2	609584	610042	459	automatic/finished	no			putative transcriptional regulator, AsnC/Lrp family	3 : Putative function from multiple computational evidences	r : regulator	2 : Cytoplasmic	3.1.2 : Transcriptional level ;						no			12.1 : DNA interactions ;
CmetNA4v1_40070	CDS	-2	610106	610660	555	automatic/finished	no			putative Cysteine dioxygenase type I	3 : Putative function from multiple computational evidences	e : enzyme	1 : Unknown	1.1.3.9 : L-cysteine catabolism ;	1.13.11.20	CYSTEINE-DIOXYGENASE-RXN	CYSTEINE-DEG-PWY			no			6.2 : Amino acids and amines ;
CmetNA4v1_40071	CDS		610609	610857	249	automatic/finished	no			conserved protein of unknown function	4 : Unknown function but conserved in other organisms	u : unknown	1 : Unknown							no
CmetNA4v1_40072	CDS		610793	611782	990	automatic/finished	no			putative TRANSCRIPTIONal REGULATOR, lysR family	3 : Putative function from multiple computational evidences	r : regulator	2 : Cytoplasmic	3.1.2 : Transcriptional level ;						no			12.1 : DNA interactions ;
CmetNA4v1_40073	CDS		611917	613224	1308	automatic/finished	no	gdhA	RS04415	GLUTAMATE DEHYDROGENASE (NAD(P)) OXIDOREDUCTASE	2a : Function from experimental evidences in other organisms	e : enzyme	2 : Cytoplasmic	1.5.1.1 : Glutamate ;	1.4.1.3	GLUTAMATE-DEHYDROGENASE-NADP+RXN	GLUTAMATE-SYN2-PWY$PWY-5766			no			1.3 : Glutamate family ;
CmetNA4v1_40074	CDS		613528	614427	900	automatic/finished	no	gltI	ybeJ, yzzK	glutamate/aspartate transport protein; ABC superfamily, periplasmic binding component	2a : Function from experimental evidences in other organisms	t : transporter	9 : Periplasmic	1.5.1.1 : Glutamate ; 4.3.A.1.p : periplasmic binding component ; 7.2 : Periplasmic space ;						no			1.3 : Glutamate family ; 7 : Transport and binding proteins ;
CmetNA4v1_40075	CDS		614493	615221	729	automatic/finished	no	gltJ		glutamate/aspartate transport protein; ABC superfamily, membrane component	2a : Function from experimental evidences in other organisms	t : transporter	5 : Inner membrane protein	1.5.1.1 : Glutamate ; 1.5.1.5 : Aspartate ; 4.3.A.1.m : membrane component ; 6.1 : Membrane ; 7.3 : Inner membrane ;						no			1.2 : Aspartate family ; 1.3 : Glutamate family ; 7 : Transport and binding proteins ;
CmetNA4v1_40076	CDS		615233	615916	684	automatic/finished	no	gltK		glutamate/aspartate transport protein; ABC superfamily, membrane component	2a : Function from experimental evidences in other organisms	t : transporter	5 : Inner membrane protein	1.5.1.1 : Glutamate ; 1.5.1.5 : Aspartate ; 4.3.A.1.m : membrane component ; 6.1 : Membrane ; 7.3 : Inner membrane ;						no			1.2 : Aspartate family ; 1.3 : Glutamate family ; 7 : Transport and binding proteins ;
CmetNA4v1_40077	CDS		615913	616647	735	automatic/finished	no	gltL		glutamate/aspartate transport protein; ABC superfamily, atp_binding component	2a : Function from experimental evidences in other organisms	t : transporter	2 : Cytoplasmic	1.5.1.1 : Glutamate ; 1.5.1.5 : Aspartate ; 4.3.A.1.a : ATP binding component ; 7.1 : Cytoplasm ;						no			1.2 : Aspartate family ; 1.3 : Glutamate family ; 7 : Transport and binding proteins ;
CmetNA4v1_40078	CDS	-3	616756	617700	945	automatic/finished	no			putative glutamine amidotransferase	3 : Putative function from multiple computational evidences	e : enzyme	1 : Unknown	1 : Metabolism ;		GMP-SYN-GLUT-RXN$PABASYN-RXN	PWY-6125$PWY-6543			no			18.1 : Enzymes of unknown specificity ;
CmetNA4v1_40079	CDS		617716	618789	1074	automatic/finished	no	ttuC		tartrate dehydrogenase	2a : Function from experimental evidences in other organisms	e : enzyme	1 : Unknown	1.7.21 : Glyoxylate degradation ;	1.1.1.93	RXN-8643$TARTRATE-DEHYDROGENASE-RXN				no	7592429		6 : Energy metabolism ;
CmetNA4v1_40080	CDS		618786	620084	1299	automatic/finished	no	ttuD	RS05749	HYDROXYPYRUVATE REDUCTASE OXIDOREDUCTASE PROTEIN	2a : Function from experimental evidences in other organisms	e : enzyme	1 : Unknown	1.7.21 : Glyoxylate degradation ;	1.1.1.81	GLYCERATE-DEHYDROGENASE-RXN$HYDROXYPYRUVATE-REDUCTASE-RXN$RXN0-300	PWY-1622			no	7592429		6 : Energy metabolism ;
CmetNA4v1_40081	CDS		620117	621151	1035	automatic/finished	no	pyrC		dihydro-orotase	2a : Function from experimental evidences in other organisms	e : enzyme	2 : Cytoplasmic	1.5.2.2 : Pyrimidine biosynthesis ; 7.1 : Cytoplasm ;	3.5.2.3	DIHYDROOROT-RXN	PWY-5686			no	11401542		2.4 : Pyrimidine ribonucleotide biosynthesis ;
CmetNA4v1_40082	CDS		621157	621945	789	automatic/finished	no			conserved hypothetical protein	4 : Unknown function but conserved in other organisms	u : unknown	1 : Unknown							no			18 : Unknown function ;
CmetNA4v1_miscRNA5	misc_RNA		621981	622321	341	automatic/finished	no			RNaseP_bact_a												Predicted by Rfam, accession=RF00010, e-value=5.3e-77.
CmetNA4v1_40083	CDS	-1	622404	622826	423	automatic/finished	no			conserved hypothetical protein; Predicted redox protein, regulator of disulfide bond formation; osmC-like motif	4 : Unknown function but conserved in other organisms	u : unknown	1 : Unknown	5.5 : Adaptation to stress ;						no			15.10 : Adaptations to atypical conditions ;
CmetNA4v1_40084	CDS		622909	623118	210	automatic/finished	no			conserved protein of unknown function	4 : Unknown function but conserved in other organisms	u : unknown	1 : Unknown							no
CmetNA4v1_40085	CDS	-1	623055	623399	345	automatic/finished	no			conserved protein of unknown function	4 : Unknown function but conserved in other organisms	u : unknown	1 : Unknown							no
CmetNA4v1_40086	CDS		623103	623333	231	automatic/finished	no			conserved protein of unknown function	4 : Unknown function but conserved in other organisms	u : unknown	1 : Unknown							no
CmetNA4v1_miscRNA6	misc_RNA		623236	623300	65	automatic/finished	no			Betaproteobacteria_toxic_sRNA												Predicted by Rfam, accession=RF02278, e-value=2e-10.
CmetNA4v1_40087	CDS		623586	624014	429	automatic/finished	no	rplM		50S ribosomal subunit protein L13	2a : Function from experimental evidences in other organisms	s : structure	2 : Cytoplasmic	2.3.2 : Translation ; 2.3.8 : Ribosomal proteins ; 6.6 : Ribosome ; 7.1 : Cytoplasm ;						no			10.2 : Ribosomal proteins: synthesis and modification ; 10.4 : Translation factors ;
CmetNA4v1_40088	CDS		624029	624421	393	automatic/finished	no	rpsI		30S ribosomal subunit protein S9	2a : Function from experimental evidences in other organisms	s : structure	2 : Cytoplasmic	2.3.2 : Translation ; 2.3.8 : Ribosomal proteins ; 6.6 : Ribosome ; 7.1 : Cytoplasm ;						no			10.2 : Ribosomal proteins: synthesis and modification ; 10.4 : Translation factors ;
CmetNA4v1_40089	CDS		624640	625395	756	automatic/finished	no			putative DNA binding; transmembrane protein	3 : Putative function from multiple computational evidences									no
CmetNA4v1_40090	CDS		625419	625913	495	automatic/finished	no			conserved hypothetical protein, DUF583	4 : Unknown function but conserved in other organisms	u : unknown	1 : Unknown							no			18 : Unknown function ;
CmetNA4v1_40091	CDS		626022	626390	369	automatic/finished	no			conserved hypothetical protein, HesB family	4 : Unknown function but conserved in other organisms	u : unknown	1 : Unknown							no			18 : Unknown function ;
CmetNA4v1_40092	CDS	-3	626482	627624	1143	automatic/finished	no			conserved hypothetical protein, UPF0075	4 : Unknown function but conserved in other organisms	u : unknown	1 : Unknown							no			18 : Unknown function ;
CmetNA4v1_40093	CDS	-1	627627	629021	1395	automatic/finished	no			putative metallopeptidase, M23B family	3 : Putative function from multiple computational evidences	e : enzyme	1 : Unknown							no
CmetNA4v1_40094	CDS		629240	630481	1242	automatic/finished	no	tyrS	RS05028	TYROSYL-TRNA SYNTHETASE	2a : Function from experimental evidences in other organisms	e : enzyme	2 : Cytoplasmic	2.3.1 : Amino acid-activation ;	6.1.1.1	TYROSINE--TRNA-LIGASE-RXN	TRNA-CHARGING-PWY			no	7517395		10.1 : tRNA aminoacylation ;
CmetNA4v1_40095	CDS		630495	630965	471	automatic/finished	no	dtd	yihZ	D-Tyr-tRNA(Tyr) deacylase	2a : Function from experimental evidences in other organisms	e : enzyme	2 : Cytoplasmic	2.2.3 : RNA modification ; 5.6.2 : Detoxification (xenobiotic metabolism) ; 7.1 : Cytoplasm ;	3.1.-.-					no	11568181		9.4 : RNA processing ; 10.3 : tRNA and rRNA base modification ; 15.5 : Detoxification ;
CmetNA4v1_40096	CDS		630999	631646	648	automatic/finished	no			putative Phosphatidylethanolamine-binding protein	3 : Putative function from multiple computational evidences	e : enzyme	1 : Unknown							no
CmetNA4v1_40097	CDS		631708	632382	675	automatic/finished	no			putative PHOSPHOGLYCERATE MUTASE	3 : Putative function from multiple computational evidences	e : enzyme	1 : Unknown	1.7.8 : Gluconeogenesis ; 1.3.1 : Glycolysis ;	5.4.2.1	3PGAREARR-RXN	GLUCONEO-PWY$PWY-6142$PWY-1622$GLYCOLYSIS-E-D$ANAGLYCOLYSIS-PWY$GLYCOLYSIS			no			6.8 : Glycolysis/gluconeogenesis ;
CmetNA4v1_40098	CDS	-3	632512	633096	585	automatic/finished	no			putative lipoprotein	3 : Putative function from multiple computational evidences	lp : lipoprotein	1 : Unknown							no
CmetNA4v1_40099	CDS	-2	633143	633754	612	automatic/finished	no			conserved hypothetical protein; putative exported protein	4 : Unknown function but conserved in other organisms	u : unknown	1 : Unknown							no			18 : Unknown function ;
CmetNA4v1_40100	CDS	-2	633956	635023	1068	automatic/finished	no	ruvB		ATP-dependent DNA helicase, subunit B of RuvABC Holliday junction resolvasome	2a : Function from experimental evidences in other organisms	e : enzyme	2 : Cytoplasmic	2.1.3 : DNA recombination ; 2.1.4 : DNA repair ; 5.8 : SOS response ; 7.1 : Cytoplasm ;	3.1.22.4	3.1.22.4-RXN				no	10851230		8.1 : DNA replication, recombination, and repair ; 15.10 : Adaptations to atypical conditions ;
CmetNA4v1_40101	CDS	-2	635093	635674	582	automatic/finished	no	ruvA		subunit A of RuvABC Holliday junction resolvasome, regulatory subunit	2a : Function from experimental evidences in other organisms	e : enzyme	2 : Cytoplasmic	2.1.3 : DNA recombination ; 2.1.4 : DNA repair ; 5.8 : SOS response ; 7.1 : Cytoplasm ;		3.1.22.4-RXN				no	10851230		8.1 : DNA replication, recombination, and repair ; 15.10 : Adaptations to atypical conditions ;
CmetNA4v1_40102	CDS	-2	635729	636907	1179	automatic/finished	no			Glycerophosphoryl diester phosphodiesterase	2b : Function from indirect experimental evidences (e.g. phenotypes)	e : enzyme	9 : Periplasmic	1.6.1 : Phospholipid ;	3.1.4.46	GLYCPDIESTER-RXN				no			3.1 : Biosynthesis ;
CmetNA4v1_40103	CDS	-2	637022	637567	546	automatic/finished	no	ruvC		endodeoxyribonuclease, subunit C of RuvABC Holliday junction resolvasome	2a : Function from experimental evidences in other organisms	e : enzyme	2 : Cytoplasmic	2.1.3 : DNA recombination ; 2.1.4 : DNA repair ; 7.1 : Cytoplasm ; 5.8 : SOS response ;	3.1.22.4	3.1.22.4-RXN				no	10851230		8.1 : DNA replication, recombination, and repair ; 15.10 : Adaptations to atypical conditions ;
CmetNA4v1_40104	CDS	-2	637694	639268	1575	automatic/finished	no	purH		bifunctional: IMP cyclohydrolase (N-terminal); phosphoribosylaminoimidazolecarboxamide formyltransferase (C-terminal)	2a : Function from experimental evidences in other organisms	e : enzyme	2 : Cytoplasmic	1.5.2.1 : Purine biosynthesis ; 1.7.33 : Nucleotide and nucleoside conversions ; 7.1 : Cytoplasm ;	2.1.2.3, 3.5.4.10	IMPCYCLOHYDROLASE-RXN$AICARTRANSFORM-RXN	PWY-6123			no			2.2 : Nucleotide and nucleoside interconversions ; 2.3 : Purine ribonucleotide biosynthesis ;
CmetNA4v1_40105	CDS	-1	639291	639524	234	automatic/finished	no			putative transcriptional regulator, FIS family	3 : Putative function from multiple computational evidences	r : regulator	2 : Cytoplasmic	3.1.2 : Transcriptional level ;						no			12.1 : DNA interactions ;
CmetNA4v1_40106	CDS	-2	639521	640585	1065	automatic/finished	no	dusB	yhdG	tRNA-dihydrouridine synthase B	2a : Function from experimental evidences in other organisms	e : enzyme	1 : Unknown	2.3.2 : Translation ; 6.6 : Ribosome ;		RXN0-1281				no	11983710		10.2 : Ribosomal proteins: synthesis and modification ; 10.4 : Translation factors ;
CmetNA4v1_40107	CDS	-3	640789	642042	1254	automatic/finished	no	ubiH	visB, acd	2-octaprenyl-6-methoxyphenol hydroxylase, FAD/NAD(P)-binding	2a : Function from experimental evidences in other organisms	e : enzyme	1 : Unknown	1.3.6 : Aerobic respiration ; 1.5.3.11 : Menaquinone (MK), ubiquinone (Q) ;	1.14.13.-	2-OCTAPRENYL-6-METHOXYPHENOL-HYDROX-RXN	PWY-6708			no			4.5 : Menaquinone and ubiquinone ; 6.1 : Aerobic ;
CmetNA4v1_40108	CDS	-2	642020	642484	465	automatic/finished	no			conserved hypothetical protein	4 : Unknown function but conserved in other organisms	u : unknown	1 : Unknown							no			18 : Unknown function ;
CmetNA4v1_40109	CDS	-3	642481	643878	1398	automatic/finished	no	pepP		proline aminopeptidase P II	2a : Function from experimental evidences in other organisms	e : enzyme	1 : Unknown	1.2.3 : Proteins/peptides/glycopeptides ;	3.4.11.9	3.4.11.9-RXN				no	9520390		11.4 : Degradation of proteins, peptides, and glycopeptides ;
CmetNA4v1_40110	CDS	-1	644007	644714	708	automatic/finished	no			putative sugar-phosphate nucleotidyl transferase	3 : Putative function from multiple computational evidences	e : enzyme	1 : Unknown	1 : Metabolism ;	2.7.7.-	2.7.7.37-RXN				no			18.1 : Enzymes of unknown specificity ;
CmetNA4v1_40111	CDS	-2	644711	645034	324	automatic/finished	no			conserved hypothetical protein, COG4392; putative transmembrane protein	4 : Unknown function but conserved in other organisms	u : unknown	11 : Membrane							no			18 : Unknown function ;
CmetNA4v1_40112	CDS	-3	645031	645828	798	automatic/finished	no			putative branched-chain amino acid permease; AzlC family	3 : Putative function from multiple computational evidences	t : transporter	11 : Membrane	4 : Transport ;						no			7 : Transport and binding proteins ;
CmetNA4v1_40113	CDS	-1	645840	646886	1047	automatic/finished	no			putative Aminoglycoside phosphotransferase	3 : Putative function from multiple computational evidences	e : enzyme	1 : Unknown			KANAMYCIN-KINASE-RXN				no
CmetNA4v1_40114	CDS		647069	649543	2475	automatic/finished	no	imp	ostA	exported protein required for envelope biosynthesis and integrity (ORGANIC SOLVENT TOLERANCE TRANSMEMBRANE PROTEIN)	2b : Function from indirect experimental evidences (e.g. phenotypes)	f : factor	11 : Membrane	5.5.6 : Other stresses (mechanical, nutritional, oxidative) ; 6.1 : Membrane ;						no	12207697		15.10 : Adaptations to atypical conditions ;
CmetNA4v1_40115	CDS		649553	651034	1482	automatic/finished	no	surA		peptidyl-prolyl cis-trans isomerase (PPIase), involved in maturation of outer membrane proteins	2a : Function from experimental evidences in other organisms	e : enzyme	7 : Outer membrane protein	2.3.4 : Chaperoning, folding ; 7.4 : Outer membrane ;	5.2.1.8	PEPTIDYLPROLYL-ISOMERASE-RXN				no			11.3 : Protein folding and stabilization ;
CmetNA4v1_40116	CDS		651051	652127	1077	automatic/finished	no	pdxA		4-hydroxy-L-threonine phosphate dehydrogenase, NAD-dependent (pyridoxine phosphate biosynthetic protein)	2a : Function from experimental evidences in other organisms	e : enzyme	2 : Cytoplasmic	1.5.3.6 : Pyridoxine (vitamin B6) ; 7.1 : Cytoplasm ;	1.1.1.262	1.1.1.262-RXN	PYRIDOXSYN-PWY			no	15026039		4.8 : Pyridoxine ;
CmetNA4v1_40117	CDS		652131	652967	837	automatic/finished	no	ksgA	rsmA	S-adenosylmethionine-6-N',N'-adenosyl (rRNA) dimethyltransferase (kasugamycin resistance)	2a : Function from experimental evidences in other organisms	e : enzyme	2 : Cytoplasmic	2.2.3 : RNA modification ; 5.6.4 : Drug resistance/sensitivity ; 7.1 : Cytoplasm ;	2.1.1.-	RXN-11633				no			9.4 : RNA processing ; 10.3 : tRNA and rRNA base modification ; 15.8 : Toxin production and resistance ;
CmetNA4v1_40118	CDS		653010	654038	1029	automatic/finished	no			Tryptophanyl-tRNA synthetase(Tryptophan--tRNA ligase) (TrpRS)	2a : Function from experimental evidences in other organisms	e : enzyme	2 : Cytoplasmic	2.3.1 : Amino acid-activation ;	6.1.1.2	TRYPTOPHAN--TRNA-LIGASE-RXN	TRNA-CHARGING-PWY			no	8294486		10.1 : tRNA aminoacylation ;
CmetNA4v1_40119	CDS	-2	654104	654994	891	automatic/finished	no			putative membrane lipoprotein, DUF6	3 : Putative function from multiple computational evidences	lp : lipoprotein	5 : Inner membrane protein							no
CmetNA4v1_40120	CDS	-2	655016	655423	408	automatic/finished	no	gloA		glyoxalase I, nickel isomerase	2a : Function from experimental evidences in other organisms	e : enzyme	1 : Unknown	1.7.23 : Methylglyoxal metabolism ;	4.4.1.5	GLYOXI-RXN	PWY-5386			no	10913283		6 : Energy metabolism ;
CmetNA4v1_40121	CDS		655474	655671	198	automatic/finished	no			conserved protein of unknown function	4 : Unknown function but conserved in other organisms	u : unknown	1 : Unknown							no
CmetNA4v1_40122	CDS	-1	655779	656657	879	automatic/finished	no			putative metal-dependent hydrolase	3 : Putative function from multiple computational evidences	e : enzyme	1 : Unknown							no
CmetNA4v1_40123	CDS	-2	656654	657415	762	automatic/finished	no	plsC		1-acyl-sn-glycerol-3-phosphate acyltransferase	2b : Function from indirect experimental evidences (e.g. phenotypes)	e : enzyme	5 : Inner membrane protein	1.5.4 : Fatty acid and phosphatidic acid ;	2.3.1.51	RXN-1623$RXN0-6705$RXN0-5514$1-ACYLGLYCEROL-3-P-ACYLTRANSFER-RXN	PWY-5667$PWY4FS-8$PWY0-1319$PWY4FS-7			no			3.1 : Biosynthesis ;
CmetNA4v1_40124	CDS	-3	657445	658026	582	automatic/finished	no	gmhB		D-glycero-D-manno-heptose 1,7-bisphosphate phosphatase	2a : Function from experimental evidences in other organisms	e : enzyme	2 : Cytoplasmic	1.6.3.2 : Core region ;	3.1.3.-, 3.1.3.15	RXN0-4361	PWY0-1241			no	12101286		14.3 : Biosynthesis and degradation of surface polysaccharides and lipopolysaccharides ;
CmetNA4v1_40125	CDS	-1	658062	660185	2124	automatic/finished	no	glyS	gly-act, B	glycine tRNA synthetase, beta subunit	2a : Function from experimental evidences in other organisms	e : enzyme	2 : Cytoplasmic	2.3.1 : Amino acid-activation ; 7.1 : Cytoplasm ;	6.1.1.14	GLYCINE--TRNA-LIGASE-RXN	TRNA-CHARGING-PWY			no			10.1 : tRNA aminoacylation ;
CmetNA4v1_40126	CDS	-1	660216	660836	621	automatic/finished	no			conserved hypothetical protein; putative exported protein	4 : Unknown function but conserved in other organisms	u : unknown	1 : Unknown							no			18 : Unknown function ;
CmetNA4v1_40127	CDS	-2	660833	661786	954	automatic/finished	no	glyQ	glyS, A, cfcA	glycine tRNA synthetase, alpha subunit	2a : Function from experimental evidences in other organisms	e : enzyme	2 : Cytoplasmic	2.3.1 : Amino acid-activation ; 7.1 : Cytoplasm ;	6.1.1.14	GLYCINE--TRNA-LIGASE-RXN	TRNA-CHARGING-PWY			no			10.1 : tRNA aminoacylation ;
CmetNA4v1_40128	CDS	-2	662270	663898	1629	automatic/finished	no	cutE	lnt	apolipoprotein N-acyltransferase, copper homeostasis protein	2a : Function from experimental evidences in other organisms	e : enzyme	5 : Inner membrane protein	1.6.10 : Lipoprotein ; 6.1 : Membrane ; 7.3 : Inner membrane ;	2.3.1.-					no	8344936
CmetNA4v1_40129	CDS	-3	663895	664782	888	automatic/finished	no	corC	ybeX	Magnesium and cobalt efflux protein	2b : Function from indirect experimental evidences (e.g. phenotypes)	t : transporter	11 : Membrane	4.2.A.47 : The Divalent Anion:Na Symporter (DASS) Family ;						no			7 : Transport and binding proteins ;
CmetNA4v1_40130	CDS	-3	664927	665664	738	automatic/finished	no			putative metal-dependent hydrolase, COG0319; putative diacylglycerol kinase	3 : Putative function from multiple computational evidences	e : enzyme	1 : Unknown	1 : Metabolism ;						no			18.1 : Enzymes of unknown specificity ;
CmetNA4v1_40131	CDS	-1	665667	666662	996	automatic/finished	no			putative phosphate starvation-inducible ATPase, PhoH-like protein	3 : Putative function from multiple computational evidences	e : enzyme	2 : Cytoplasmic	5.5.6 : Other stresses (mechanical, nutritional, oxidative) ;						no			15.10 : Adaptations to atypical conditions ;
CmetNA4v1_40132	CDS	-2	666683	668035	1353	automatic/finished	no	miaB	yleA	isopentenyl-adenosine A37 tRNA methylthiolase, Fe-S protein	2a : Function from experimental evidences in other organisms	e : enzyme	2 : Cytoplasmic	2.2.3 : RNA modification ; 7.1 : Cytoplasm ;		RXN0-5063				no	11882645, 15339930, 20042346		9.4 : RNA processing ; 10.3 : tRNA and rRNA base modification ;
CmetNA4v1_40133	CDS	-2	668099	668476	378	automatic/finished	no			conserved hypothetical protein; putative exported protein	4 : Unknown function but conserved in other organisms	u : unknown	1 : Unknown							no			18 : Unknown function ;
CmetNA4v1_40134	CDS	-2	668642	670384	1743	automatic/finished	no			putative voltage-gated chloride channel, clcB-like	3 : Putative function from multiple computational evidences	t : transporter	11 : Membrane	4.1.A.11 : The Chloride Channel (ClC) Family ;						no			7 : Transport and binding proteins ;
CmetNA4v1_40135	CDS		670564	672186	1623	automatic/finished	no	rhlE		ATP-dependent RNA helicase hydrolase	2a : Function from experimental evidences in other organisms	e : enzyme	2 : Cytoplasmic	2.2.3 : RNA modification ; 1.2.1 : RNA ;	3.6.1.-					no	15554979		9.1 : Degradation of RNA ; 9.4 : RNA processing ; 10.3 : tRNA and rRNA base modification ;
CmetNA4v1_40136	CDS		672198	673244	1047	automatic/finished	no			putative aminoglycoside phosphotransferase	3 : Putative function from multiple computational evidences	e : enzyme	1 : Unknown	5.6.4 : Drug resistance/sensitivity ;	2.7.-.-	KANAMYCIN-KINASE-RXN				no			15.8 : Toxin production and resistance ;
CmetNA4v1_40137	CDS	-1	673299	673733	435	automatic/finished	no			putative Universal stress protein	3 : Putative function from multiple computational evidences	ph : phenotype	1 : Unknown	5.5 : Adaptation to stress ;						no			15.10 : Adaptations to atypical conditions ;
CmetNA4v1_40138	CDS		674063	674686	624	automatic/finished	no			putative two component transcriptional regulator, LuxR family	3 : Putative function from multiple computational evidences									no
CmetNA4v1_40139	CDS		674814	676472	1659	automatic/finished	no			Pyridoxal-dependent decarboxylase					4.1.1.-					no
CmetNA4v1_40140	CDS	-1	676482	676829	348	automatic/finished	no			conserved protein of unknown function	4 : Unknown function but conserved in other organisms	u : unknown	1 : Unknown							no
CmetNA4v1_tRNA60	tRNA	-1	676835	676911	77	automatic/finished	no			Met tRNA												tRNA Met anticodon CAT, Cove score 90.46
CmetNA4v1_40141	CDS	-3	677080	678777	1698	automatic/finished	no			putative TRANSPORTER, MSF family	3 : Putative function from multiple computational evidences	t : transporter	5 : Inner membrane protein	4.2.A.1 : The Major Facilitator Superfamily (MFS) ;						no			7 : Transport and binding proteins ;
CmetNA4v1_40142	CDS	-2	679136	679456	321	automatic/finished	no			conserved hypothetical protein	4 : Unknown function but conserved in other organisms	u : unknown	1 : Unknown							no			18 : Unknown function ;
CmetNA4v1_40143	CDS	-3	679453	681027	1575	automatic/finished	no			putative sensor histidine kinase	3 : Putative function from multiple computational evidences	rc : receptor	6 : Inner membrane-associated	3.1.2.4.3 : Two-component regulatory systems (external signal) ;						no			13.1 : Two-component systems ;
CmetNA4v1_40144	CDS	-3	681049	681738	690	automatic/finished	no			putative response regulator, CheY family	3 : Putative function from multiple computational evidences	r : regulator	2 : Cytoplasmic	3.1.2.4.3 : Two-component regulatory systems (external signal) ;						no			13.1 : Two-component systems ;
CmetNA4v1_40145	CDS		681978	683039	1062	automatic/finished	no	recA	lexB, recH, rnmB, tif	DNA strand exchange and recombination protein with protease and nuclease activity	2a : Function from experimental evidences in other organisms	e : enzyme	2 : Cytoplasmic	2.1.3 : DNA recombination ; 2.1.4 : DNA repair ; 2.3.6 : Turnover, degradation ; 3.1.3.4 : Proteases, cleavage of compounds ; 5.8 : SOS response ; 7.1 : Cytoplasm ;						no	9487711		8.1 : DNA replication, recombination, and repair ; 11.4 : Degradation of proteins, peptides, and glycopeptides ; 12.3 : Protein interactions ; 15.10 : Adaptations to atypical conditions ;
CmetNA4v1_40146	CDS		683156	683626	471	automatic/finished	no			putative RecA REGULATORY PROTEIN RECX, COG2137	3 : Putative function from multiple computational evidences	r : regulator	2 : Cytoplasmic	3.1.4 : Regulation level unknown ; 5.8 : SOS response ;						no			12 : Regulatory functions ; 15.10 : Adaptations to atypical conditions ;
CmetNA4v1_40147	CDS		683966	684739	774	automatic/finished	no			protein of unknown function	5 : Unknown function	u : unknown	1 : Unknown							no
CmetNA4v1_40148	CDS		684726	685892	1167	automatic/finished	no	sucC		succinyl-CoA synthetase, beta subunit	2a : Function from experimental evidences in other organisms	e : enzyme	1 : Unknown	1.3.4 : Tricarboxylic acid cycle ;	6.2.1.5	SUCCCOASYN-RXN	PWY-5690$PWY-5913$TCA			no	9917402		6.12 : TCA cycle ;
CmetNA4v1_40149	CDS		685951	686832	882	automatic/finished	no	sucD		succinyl-CoA synthetase, alpha subunit, NAD(P)-binding	2a : Function from experimental evidences in other organisms	e : enzyme	1 : Unknown	1.3.4 : Tricarboxylic acid cycle ;	6.2.1.5	SUCCCOASYN-RXN	PWY-5690$PWY-5913$TCA			no	9917402		6.12 : TCA cycle ;
CmetNA4v1_40150	CDS		686875	687069	195	automatic/finished	no			conserved protein of unknown function	4 : Unknown function but conserved in other organisms	u : unknown	1 : Unknown							no
CmetNA4v1_40151	CDS		687146	687841	696	automatic/finished	no			conserved hypothetical protein; putative membrane protein, TerC family	4 : Unknown function but conserved in other organisms	u : unknown	5 : Inner membrane protein							no			18 : Unknown function ;
CmetNA4v1_40152	CDS		688210	688758	549	automatic/finished	no	pilA		Fimbrial protein										no
CmetNA4v1_40153	CDS		688798	689502	705	automatic/finished	no			Fimbrial protein (modular protein)										no
CmetNA4v1_40154	CDS		689733	691520	1788	automatic/finished	no			putative lipopolysaccharide biosynthesis protein	3 : Putative function from multiple computational evidences	e : enzyme	5 : Inner membrane protein	6.3 : Surface antigens (ECA, O antigen of LPS) ;						no			14.3 : Biosynthesis and degradation of surface polysaccharides and lipopolysaccharides ;
CmetNA4v1_40155	CDS	-3	691543	692082	540	automatic/finished	no			conserved exported protein of unknown function	4 : Unknown function but conserved in other organisms	u : unknown	1 : Unknown							no
CmetNA4v1_40156	CDS	-1	692079	692543	465	automatic/finished	no			conserved exported protein of unknown function	4 : Unknown function but conserved in other organisms	u : unknown	1 : Unknown							no
CmetNA4v1_40157	CDS	-2	692864	693109	246	automatic/finished	no			conserved exported protein of unknown function	4 : Unknown function but conserved in other organisms	u : unknown	1 : Unknown							no
CmetNA4v1_40158	CDS	-1	693288	693476	189	automatic/finished	no			conserved protein of unknown function	4 : Unknown function but conserved in other organisms	u : unknown	1 : Unknown							no
CmetNA4v1_40159	CDS	-2	693569	694240	672	automatic/finished	no			Integrase family protein (fragment)										no
CmetNA4v1_40160	CDS		693836	694063	228	automatic/finished	no			protein of unknown function	5 : Unknown function	u : unknown	1 : Unknown							no
CmetNA4v1_40161	CDS	-3	694384	694863	480	automatic/finished	no	moaC		molybdenum cofactor biosynthesis protein C	2a : Function from experimental evidences in other organisms	e : enzyme	1 : Unknown	1.5.3.4 : Molybdenum (molybdopterin) ;						no	10903949		4.6 : Molybdopterin ;
CmetNA4v1_40162	CDS		695027	696718	1692	automatic/finished	no			putative zinc metallopeptidase, putative precursor	3 : Putative function from multiple computational evidences	e : enzyme	1 : Unknown							no
CmetNA4v1_40163	CDS	-3	696763	697335	573	automatic/finished	no			conserved hypothetical protein	4 : Unknown function but conserved in other organisms	u : unknown	1 : Unknown							no			18 : Unknown function ;
CmetNA4v1_40164	CDS	-3	697399	698436	1038	automatic/finished	no			putative enzyme with alpha/beta-hydrolase domain	3 : Putative function from multiple computational evidences	e : enzyme	1 : Unknown							no
CmetNA4v1_40165	CDS	-1	698454	698894	441	automatic/finished	no			conserved hypothetical protein	4 : Unknown function but conserved in other organisms	u : unknown	1 : Unknown							no			18 : Unknown function ;
CmetNA4v1_40166	CDS	-3	698905	699969	1065	automatic/finished	no	rfaF	waaF	ADP-heptose:LPS heptosyltransferase II	2a : Function from experimental evidences in other organisms	e : enzyme	1 : Unknown	1.6.3.2 : Core region ; 6.3 : Surface antigens (ECA, O antigen of LPS) ;	2.-.-.-	RXN0-5061	LIPA-CORESYN-PWY			no			14.3 : Biosynthesis and degradation of surface polysaccharides and lipopolysaccharides ;
CmetNA4v1_40167	CDS	-2	700043	700237	195	automatic/finished	no			conserved hypothetical protein	4 : Unknown function but conserved in other organisms	u : unknown	1 : Unknown							no			18 : Unknown function ;
CmetNA4v1_40168	CDS	-3	700297	701217	921	automatic/finished	no	ilvE		branched-chain amino-acid aminotransferase	2a : Function from experimental evidences in other organisms	e : enzyme	1 : Unknown	1.5.1.17 : Alanine ; 1.5.1.18 : Isoleucine/valine ; 1.5.1.19 : Leucine ;	2.6.1.42	BRANCHED-CHAINAMINOTRANSFERVAL-RXN$BRANCHED-CHAINAMINOTRANSFERILEU-RXN$PHEAMINOTRANS-RXN$BRANCHED-CHAINAMINOTRANSFERLEU-RXN	ALANINE-VALINESYN-PWY$VALSYN-PWY$PWY-5057$VALDEG-PWY$ILEUSYN-PWY$ILEUDEG-PWY$PHESYN$LEUSYN-PWY$LEU-DEG2-PWY			no			1.4 : Pyruvate family ;
CmetNA4v1_40169	CDS		701354	704293	2940	automatic/finished	no			putative DNA/RNA Helicase	3 : Putative function from multiple computational evidences	e : enzyme	2 : Cytoplasmic	2.1 : DNA related ; 2.2 : RNA related ;						no			8 : DNA metabolism ; 9 : Transcription ;
CmetNA4v1_40170	CDS		704518	706035	1518	automatic/finished	no			Amidase	2b : Function from indirect experimental evidences (e.g. phenotypes)	e : enzyme	2 : Cytoplasmic	1.5.1 : Amino acids ;	3.5.1.4	GUANIDINOBUTANAMIDE-NH3-RXN$RXNN-404$AMIDASE-RXN$R311-RXN	PWY-3161$P344-PWY			no			1 : Amino acid biosynthesis ;
CmetNA4v1_40171	CDS		706072	707397	1326	automatic/finished	no			putative General substrate transporter; Major facilitator superfamily MFS_1	3 : Putative function from multiple computational evidences	t : transporter	11 : Membrane	4.2.A.1 : The Major Facilitator Superfamily (MFS) ;						no			7 : Transport and binding proteins ;
CmetNA4v1_40172	CDS		707585	708385	801	automatic/finished	no			conserved hypothetical protein; Putative branched-chain amino acid permease transmembrane protein, azlC motif	4 : Unknown function but conserved in other organisms	u : unknown	5 : Inner membrane protein							no			18 : Unknown function ;
CmetNA4v1_40173	CDS		708382	708705	324	automatic/finished	no			putative membrane component, COG4392	3 : Putative function from multiple computational evidences	m : membrane component	11 : Membrane							no
CmetNA4v1_40174	CDS	-3	708757	709890	1134	automatic/finished	no			Transcriptional regulator, LuxR-family										no
CmetNA4v1_40175	CDS	-2	709898	711004	1107	automatic/finished	no			putative transcriptional Regulator, LuxR family	3 : Putative function from multiple computational evidences	r : regulator	2 : Cytoplasmic	3.1.2 : Transcriptional level ;						no			12.1 : DNA interactions ;
CmetNA4v1_40176	CDS		711382	712578	1197	automatic/finished	no	pgk		phosphoglycerate kinase	2a : Function from experimental evidences in other organisms	e : enzyme	2 : Cytoplasmic	1.1.1.23 : Galactose degradation ; 1.3.1 : Glycolysis ; 1.7.8 : Gluconeogenesis ; 7.1 : Cytoplasm ;	2.7.2.3	PHOSGLYPHOS-RXN	GLUCONEO-PWY$GLYCOLYSIS-E-D$ANAGLYCOLYSIS-PWY$GLYCOLYSIS			no	2545537		6.8 : Glycolysis/gluconeogenesis ; 6.11 : Sugars ;
CmetNA4v1_40177	CDS		712662	714101	1440	automatic/finished	no	pykA		pyruvate kinase II, glucose-stimulated	2a : Function from experimental evidences in other organisms	e : enzyme	1 : Unknown	1.1.1.23 : Galactose degradation ; 1.3.1 : Glycolysis ; 1.3.5 : Fermentation ; 1.3.7 : Anaerobic respiration ;	2.7.1.40	PEPDEPHOS-RXN	PWY-6142$GLYCOLYSIS-E-D$FERMENTATION-PWY$ANAGLYCOLYSIS-PWY$GLYCOLYSIS$ANARESP1-PWY			no	8439398		6.3 : Anaerobic ; 6.7 : Fermentation ; 6.8 : Glycolysis/gluconeogenesis ; 6.11 : Sugars ;
CmetNA4v1_40178	CDS		714222	715286	1065	automatic/finished	no	fbaA	RS04892	FRUCTOSE-BISPHOSPHATE ALDOLASE PROTEIN	2a : Function from experimental evidences in other organisms	e : enzyme	2 : Cytoplasmic	1.3.1 : Glycolysis ;	4.1.2.13	F16ALDOLASE-RXN$RXN-8631	GLUCONEO-PWY$PWY-6142$GLYCOLYSIS-E-D$ANAGLYCOLYSIS-PWY$GLYCOLYSIS			no	8550527		6.8 : Glycolysis/gluconeogenesis ;
CmetNA4v1_40179	CDS		715389	716297	909	automatic/finished	no	purC	RS04891	PHOSPHORIBOSYLAMINOIMIDAZOLE-SUCCINOCARBOXAMIDE SYNTHASE	2a : Function from experimental evidences in other organisms	e : enzyme	2 : Cytoplasmic	1.5.2.1 : Purine biosynthesis ;	6.3.2.6	SAICARSYN-RXN	PWY-6123			no	1534690		2.3 : Purine ribonucleotide biosynthesis ;
CmetNA4v1_40180	CDS		716319	716816	498	automatic/finished	no	purE	ade3, f, Pur2	N5-carboxyaminoimidazole ribonucleotide mutase	2a : Function from experimental evidences in other organisms	e : enzyme	2 : Cytoplasmic	1.5.2.1 : Purine biosynthesis ; 7.1 : Cytoplasm ;	4.1.1.21	RXN0-743	PWY-6123			no	10574791		2.3 : Purine ribonucleotide biosynthesis ;
CmetNA4v1_40181	CDS		716846	718090	1245	automatic/finished	no	purK	purE2	phosphoribosylaminoimidazole carboxylase (AIR carboxylase), ATPase subunit	2a : Function from experimental evidences in other organisms	e : enzyme	2 : Cytoplasmic	1.5.2.1 : Purine biosynthesis ; 7.1 : Cytoplasm ;	4.1.1.21	RXN0-742	PWY-6123			no	10569930		2.3 : Purine ribonucleotide biosynthesis ;
CmetNA4v1_40182	CDS		718106	719098	993	automatic/finished	no			conserved hypothetical protein, Sua5/YciO/YrdC/YwlC family; putative double-stranded RNA binding domain	4 : Unknown function but conserved in other organisms	u : unknown	1 : Unknown							no			18 : Unknown function ;
CmetNA4v1_40183	CDS	-3	719167	720723	1557	automatic/finished	no	dacB		Serine-type D-Ala-D-Ala carboxypeptidase	2b : Function from indirect experimental evidences (e.g. phenotypes)	e : enzyme	9 : Periplasmic	1.6.7 : Peptidoglycan (murein) ; 5.6.4 : Drug resistance/sensitivity ;	3.4.16.4	RXN0-3461				no			14.2 : Biosynthesis and degradation of murein sacculus and peptidoglycan ; 15.8 : Toxin production and resistance ;
CmetNA4v1_40184	CDS	-1	720840	721301	462	automatic/finished	no			conserved hypothetical protein; Transmembrane protein	4 : Unknown function but conserved in other organisms	u : unknown	5 : Inner membrane protein							no			18 : Unknown function ;
CmetNA4v1_40185	CDS		721484	722383	900	automatic/finished	no			putative transcriptional regulator, LysR family	3 : Putative function from multiple computational evidences	r : regulator	2 : Cytoplasmic	3.1.2 : Transcriptional level ;						no			12.1 : DNA interactions ;
CmetNA4v1_40186	CDS	-2	722423	723916	1494	automatic/finished	no	mdtD		RND efflux system, outer membrane lipoprotein	2a : Function from experimental evidences in other organisms	t : transporter	7 : Outer membrane protein	5.6.4 : Drug resistance/sensitivity ; 4.2.A.6 : The Resistance-Nodulation-Cell Division (RND) Superfamily ;						no	12107134		7 : Transport and binding proteins ; 15.8 : Toxin production and resistance ;
CmetNA4v1_40187	CDS	-3	723916	727218	3303	automatic/finished	no	mdtC	yegO	multidrug efflux system, subunit C	2a : Function from experimental evidences in other organisms	t : transporter	7 : Outer membrane protein	4.2.A.6 : The Resistance-Nodulation-Cell Division (RND) Superfamily ; 5.6.4 : Drug resistance/sensitivity ; 6.1 : Membrane ; 7.4 : Outer membrane ;						no	12107134		7 : Transport and binding proteins ; 15.8 : Toxin production and resistance ;
CmetNA4v1_40188	CDS	-1	727218	730373	3156	automatic/finished	no	mdtB	yegN	multidrug efflux system, subunit B	2a : Function from experimental evidences in other organisms	t : transporter	7 : Outer membrane protein	4.2.A.6 : The Resistance-Nodulation-Cell Division (RND) Superfamily ; 5.6.4 : Drug resistance/sensitivity ; 6.1 : Membrane ; 7.4 : Outer membrane ;						no	12107134		7 : Transport and binding proteins ; 15.8 : Toxin production and resistance ;
CmetNA4v1_40189	CDS	-1	730395	731825	1431	automatic/finished	no	mdtA		multidrug efflux system, subunit A	2a : Function from experimental evidences in other organisms	t : transporter	5 : Inner membrane protein	4.2.A.6 : The Resistance-Nodulation-Cell Division (RND) Superfamily ; 5.6.4 : Drug resistance/sensitivity ;						no	12107134		7 : Transport and binding proteins ; 15.8 : Toxin production and resistance ;
CmetNA4v1_40190	CDS		732109	732843	735	automatic/finished	no			putative response regulator, OmpR family	3 : Putative function from multiple computational evidences	r : regulator	2 : Cytoplasmic	3.1.2.4.3 : Two-component regulatory systems (external signal) ;						no	12107134		13.1 : Two-component systems ;
CmetNA4v1_40191	CDS		732840	734123	1284	automatic/finished	no			putative sensor histine kinase	3 : Putative function from multiple computational evidences	rc : receptor	5 : Inner membrane protein	3.1.2.4.3 : Two-component regulatory systems (external signal) ;						no	12107134		13.1 : Two-component systems ;
CmetNA4v1_40192	CDS	-2	734198	734806	609	automatic/finished	no			conserved hypothetical protein, DUF205	4 : Unknown function but conserved in other organisms	u : unknown	5 : Inner membrane protein	6.1 : Membrane ;						no			18 : Unknown function ;
CmetNA4v1_40193	CDS	-3	734905	735396	492	automatic/finished	no			conserved hypothetical protein; putative nucleotide/oligonucleotide binding protein	4 : Unknown function but conserved in other organisms	u : unknown	1 : Unknown							no			18 : Unknown function ;
CmetNA4v1_40194	CDS	-2	735419	736327	909	automatic/finished	no	xerD	xprB	site-specific tyrosine recombinase	2a : Function from experimental evidences in other organisms	e : enzyme	2 : Cytoplasmic	2.1.3 : DNA recombination ; 5.1 : Cell division ;						no			8.1 : DNA replication, recombination, and repair ; 15.1 : Cell division ;
CmetNA4v1_40195	CDS	-3	736324	736803	480	automatic/finished	no			putative METHYLATED-DNA--PROTEIN-CYSTEINE METHYLTRANSFERASE	3 : Putative function from multiple computational evidences	e : enzyme	2 : Cytoplasmic	2.1.4 : DNA repair ;	2.1.1.63	2.1.1.63-RXN				no			8.1 : DNA replication, recombination, and repair ;
CmetNA4v1_40196	CDS	-1	736989	737969	981	automatic/finished	no			conserved hypothetical protein, UPF0065	4 : Unknown function but conserved in other organisms	u : unknown	9 : Periplasmic							no	12562821		18 : Unknown function ;
CmetNA4v1_40197	CDS	-3	738073	738690	618	automatic/finished	no			conserved exported protein of unknown function	4 : Unknown function but conserved in other organisms	u : unknown	1 : Unknown							no
CmetNA4v1_40198	CDS		738851	739744	894	automatic/finished	no			putative transporter, Auxin Efflux Carrier (AEC) family	3 : Putative function from multiple computational evidences	t : transporter	5 : Inner membrane protein	4.2.A.69 : The Auxin Efflux Carrier (AEC) Family ;						no			7 : Transport and binding proteins ;
CmetNA4v1_40199	CDS	-3	739765	740949	1185	automatic/finished	no			conserved hypothetical protein, 4Fe-4S cluster binding motif	4 : Unknown function but conserved in other organisms	u : unknown	1 : Unknown	1.4 : Energy production/transport ;						no			6.5 : Electron transport ;
CmetNA4v1_40200	CDS		740966	741499	534	automatic/finished	no			putative enzyme with nucleoside triP hydrolase domain, UPF0079; putative exported protein	3 : Putative function from multiple computational evidences	e : enzyme	1 : Unknown							no
CmetNA4v1_40201	CDS		741493	742986	1494	automatic/finished	no	amiC	ygdN	N-acetylmuramoyl-L-alanine amidase	2a : Function from experimental evidences in other organisms	e : enzyme	1 : Unknown	1.6.7 : Peptidoglycan (murein) ; 5.1 : Cell division ; 6.2 : Peptidoglycan (murein) ;	3.5.1.28	3.5.1.28-RXN				no			14.2 : Biosynthesis and degradation of murein sacculus and peptidoglycan ; 15.1 : Cell division ;
CmetNA4v1_40202	CDS	-1	743106	744128	1023	automatic/finished	no			putative Na dependent transporter, COG0385	3 : Putative function from multiple computational evidences	t : transporter	5 : Inner membrane protein	4.2 : Electrochemical potential driven transporters ;						no			7 : Transport and binding proteins ;
CmetNA4v1_40203	CDS		744226	745131	906	automatic/finished	no			putative transcriptional regulator, LysR family	3 : Putative function from multiple computational evidences	r : regulator	1 : Unknown	3.1.2 : Transcriptional level ;						no			12.1 : DNA interactions ;
CmetNA4v1_40204	CDS	-3	745168	745938	771	automatic/finished	no			putative SAM-dependent methyltransferase, UbiE/COQ5 family; putative exported protein	3 : Putative function from multiple computational evidences	e : enzyme	1 : Unknown							no
CmetNA4v1_40205	CDS		746063	746857	795	automatic/finished	no			putative DNA binding protein, Helix-turn-helix motif; cro/C1-type DNA-binding domain	3 : Putative function from multiple computational evidences	r : regulator	2 : Cytoplasmic	3.1.1 : DNA structure level ;						no			12 : Regulatory functions ;
CmetNA4v1_40206	CDS	-2	746906	747664	759	automatic/finished	no			putative 3-HYDROXYACYL-COA DEHYDROGENASE TYPE II OXIDOREDUCTASE PROTEIN	3 : Putative function from multiple computational evidences	e : enzyme	1 : Unknown	1 : Metabolism ;	1.1.1.35	RXN-12750$RXN-12709$RXN-12705$RXN-12570$RXN0-2044$RXN-11662$RXN-11245$RXN-10703$RXN-10702$RXN-10698$OHACYL-COA-DEHYDROG-RXN	PWY-6944$PWY-6948$PWY-6945$PWY-6946$PWY0-321$PWY-5177$CENTFERM-PWY$FAO-PWY			no			18.1 : Enzymes of unknown specificity ;
CmetNA4v1_40207	CDS	-3	747808	748473	666	automatic/finished	no	adk	dnaW, plsA	adenylate kinase	2a : Function from experimental evidences in other organisms	e : enzyme	2 : Cytoplasmic	1.5.2.3 : Purine ribonucleotide biosynthesis ; 1.7.33 : Nucleotide and nucleoside conversions ; 7.1 : Cytoplasm ;	2.7.4.3	ADENYL-KIN-RXN	PWY-6126$P1-PWY			no			2.2 : Nucleotide and nucleoside interconversions ; 2.3 : Purine ribonucleotide biosynthesis ;
CmetNA4v1_40208	CDS	-2	748808	749635	828	automatic/finished	no	kdsB		CTP:CMP-3-deoxy-D-manno-octulosonate transferase	2a : Function from experimental evidences in other organisms	e : enzyme	2 : Cytoplasmic	1.6.3.3 : Lipid A ; 1.6.5 : K antigen ; 6.1 : Membrane ; 6.2 : Peptidoglycan (murein) ; 6.3 : Surface antigens (ECA, O antigen of LPS) ; 6.7 : Capsule (M and K antigens) ; 7.1 : Cytoplasm ;	2.7.7.38	CPM-KDOSYNTH-RXN	PWY-1269$KDO-NAGLIPASYN-PWY			no			14.2 : Biosynthesis and degradation of murein sacculus and peptidoglycan ; 14.3 : Biosynthesis and degradation of surface polysaccharides and lipopolysaccharides ;
CmetNA4v1_40209	CDS	-3	749635	749844	210	automatic/finished	no			conserved hypothetical protein, DUF343	4 : Unknown function but conserved in other organisms	u : unknown	1 : Unknown							no			18 : Unknown function ;
CmetNA4v1_40210	CDS	-2	749825	750943	1119	automatic/finished	no	lpxK	ycaH	tetraacyldisaccharide 4' kinase (lipid A 4'kinase)	2a : Function from experimental evidences in other organisms	e : enzyme	5 : Inner membrane protein	1.6.3.3 : Lipid A ; 1.6.5 : K antigen ; 6.1 : Membrane ; 6.2 : Peptidoglycan (murein) ; 6.3 : Surface antigens (ECA, O antigen of LPS) ; 6.7 : Capsule (M and K antigens) ; 7.3 : Inner membrane ;	2.7.1.130	TETRAACYLDISACC4KIN-RXN	KDO-NAGLIPASYN-PWY$NAGLIPASYN-PWY			no			14.2 : Biosynthesis and degradation of murein sacculus and peptidoglycan ; 14.3 : Biosynthesis and degradation of surface polysaccharides and lipopolysaccharides ;
CmetNA4v1_40211	CDS	-3	751075	751506	432	automatic/finished	no	exbD	RS01052	BIOPOLYMER TRANSPORT TRANSMEMBRANE PROTEIN	2a : Function from experimental evidences in other organisms	t : transporter	11 : Membrane	4.2.C.1 : TonB Family of Auxiliary Proteins for Energization of OMR-mediated Transport ;						no	9371459		7 : Transport and binding proteins ;
CmetNA4v1_40212	CDS	-1	751524	752144	621	automatic/finished	no	exbB	RS01053	BIOPOLYMER TRANSPORT TRANSMEMBRANE PROTEIN	2a : Function from experimental evidences in other organisms	t : transporter	11 : Membrane	4.2.C.1 : TonB Family of Auxiliary Proteins for Energization of OMR-mediated Transport ;						no	9371459		7 : Transport and binding proteins ;
CmetNA4v1_40213	CDS		752201	752410	210	automatic/finished	no			conserved protein of unknown function	4 : Unknown function but conserved in other organisms	u : unknown	1 : Unknown							no
CmetNA4v1_40214	CDS		753163	754548	1386	automatic/finished	no	xseA	xse	exonuclease VII, large subunit	2a : Function from experimental evidences in other organisms	e : enzyme	2 : Cytoplasmic	1.2.2 : DNA ; 2.1.4 : DNA repair ; 2.1.5 : DNA degradation ; 7.1 : Cytoplasm ;	3.1.11.6	3.1.11.6-RXN				no			8.1 : DNA replication, recombination, and repair ; 8.3 : Degradation of DNA ;
CmetNA4v1_40215	CDS		754028	754795	768	automatic/finished	no			conserved protein of unknown function	4 : Unknown function but conserved in other organisms	u : unknown	1 : Unknown							no
CmetNA4v1_40216	CDS		754678	755256	579	automatic/finished	no	sodB		superoxide dismutase	2a : Function from experimental evidences in other organisms	e : enzyme	2 : Cytoplasmic	5.5.6 : Other stresses (mechanical, nutritional, oxidative) ; 5.6.2 : Detoxification (xenobiotic metabolism) ; 7.1 : Cytoplasm ;	1.15.1.1	SUPEROX-DISMUT-RXN	PWY-6854$DETOX1-PWY			no			15.5 : Detoxification ; 15.10 : Adaptations to atypical conditions ;
CmetNA4v1_40217	CDS		755416	756159	744	automatic/finished	no			putative regulatory protein, TetR family	3 : Putative function from multiple computational evidences									no
CmetNA4v1_40218	CDS		756332	757666	1335	automatic/finished	no			Major facilitator superfamily (MFS_1) transporter										no
CmetNA4v1_40219	CDS	-2	757751	758833	1083	automatic/finished	no			conserved protein of unknown function	4 : Unknown function but conserved in other organisms	u : unknown	1 : Unknown							no
CmetNA4v1_40220	CDS		759006	760025	1020	automatic/finished	no			putative Ferredoxin:Oxidoreductase FAD/NAD(P)-binding:Oxidoreductase FAD-binding region	3 : Putative function from multiple computational evidences									no
CmetNA4v1_40221	CDS		760022	760690	669	automatic/finished	no			putative transcriptional regulator, TetR-family	3 : Putative function from multiple computational evidences									no
CmetNA4v1_40222	CDS		760723	761820	1098	automatic/finished	no			putative S-(hydroxymethyl)glutathione dehydrogenase; zinc-containing alcohol dehydrogenase family	3 : Putative function from multiple computational evidences	e : enzyme	2 : Cytoplasmic	1.4 : Energy production/transport ;	1.1.1.284	RXN-2962	PWY-1801			no			6.5 : Electron transport ;
CmetNA4v1_40223	CDS	-3	761887	762663	777	automatic/finished	no			beta-hydroxybutyrate dehydrogenase	2b : Function from indirect experimental evidences (e.g. phenotypes)	e : enzyme	1 : Unknown	1.1 : Carbon compound utilization ;	1.1.1.30	3-HYDROXYBUTYRATE-DEHYDROGENASE-RXN				no			6 : Energy metabolism ;
CmetNA4v1_40224	CDS	-3	762673	764064	1392	automatic/finished	no			putative permease	3 : Putative function from multiple computational evidences	t : transporter	5 : Inner membrane protein	4.2.A.8 : The Gluconate:H Symporter (GntP) Family ;						no			7 : Transport and binding proteins ;
CmetNA4v1_40225	CDS		764299	765843	1545	automatic/finished	no			Sigma54 specific transcriptional regulator, Fis-like protein										no
CmetNA4v1_40226	CDS		765912	766952	1041	automatic/finished	no			Mg2 transporter protein, CorA-like protein										no
CmetNA4v1_40227	CDS		767047	767997	951	automatic/finished	no			conserved hypothetical protein; putative polyphosphate kinase	4 : Unknown function but conserved in other organisms	u : unknown	1 : Unknown							no			18 : Unknown function ;
CmetNA4v1_40228	CDS		768206	769939	1734	automatic/finished	no			conserved exported protein of unknown function	4 : Unknown function but conserved in other organisms	u : unknown	1 : Unknown							no
CmetNA4v1_40229	CDS	-3	768211	768423	213	automatic/finished	no			exported protein of unknown function	5 : Unknown function	u : unknown	1 : Unknown							no
CmetNA4v1_40230	CDS	-2	769991	771082	1092	automatic/finished	no	fdsR		transcriptional regulator of formate dehydrogenase operon, LysR	2b : Function from indirect experimental evidences (e.g. phenotypes)	r : regulator	2 : Cytoplasmic	3.1.2 : Transcriptional level ;						no			12.1 : DNA interactions ;
CmetNA4v1_40231	CDS		771226	771735	510	automatic/finished	no	fdsG		NAD-dependent formate dehydrogenase gamma subunit	2b : Function from indirect experimental evidences (e.g. phenotypes)	e : enzyme	1 : Unknown	1.7.21 : Glyoxylate degradation ;		1.2.1.2-RXN	PWY-1881			no	9756865		6 : Energy metabolism ;
CmetNA4v1_40232	CDS		771732	773288	1557	automatic/finished	no	fdsB		NAD-dependent formate dehydrogenase beta subunit	2b : Function from indirect experimental evidences (e.g. phenotypes)	e : enzyme	1 : Unknown	1.7.21 : Glyoxylate degradation ;	1.6.99.5, 1.2.1.2	NADH-DEHYDROGENASE-QUINONE-RXN$1.6.99.5-RXN$FORMATE-DEHYDROGENASE-CYTOCHROME-RXN$1.2.1.2-RXN$FORMATE-DEHYDROGENASE-NADP+RXN$RXN0-3281$RXN-12274	PWY-1881$PWY-6142$CODH-PWY$PWY-6772			no	9756865		6 : Energy metabolism ;
CmetNA4v1_40233	CDS		773377	776250	2874	automatic/finished	no	fdsA		NAD-dependent formate dehydrogenase alpha subunit	2b : Function from indirect experimental evidences (e.g. phenotypes)	e : enzyme	1 : Unknown	1.7.21 : Glyoxylate degradation ;	1.2.1.2, 1.12.1.2	FORMATE-DEHYDROGENASE-CYTOCHROME-RXN$1.2.1.2-RXN$FORMATE-DEHYDROGENASE-NADP+RXN$HYDROGEN-DEHYDROGENASE-RXN$RXN0-3281$RXN-12274	PWY-1881$PWY-6142$CODH-PWY$PWY-5382$PWY-6758$PWY-6772			no	9756865		6 : Energy metabolism ;
CmetNA4v1_40234	CDS		776267	777112	846	automatic/finished	no	fdsC		formate dehydrogenase formation protein	2b : Function from indirect experimental evidences (e.g. phenotypes)	e : enzyme	2 : Cytoplasmic	1.3.7 : Anaerobic respiration ; 2.3.4 : Chaperoning, folding ; 1.7.21 : Glyoxylate degradation ;						no	9756865		6.3 : Anaerobic ; 11.3 : Protein folding and stabilization ;
CmetNA4v1_40235	CDS		777121	777363	243	automatic/finished	no	fdsD		NAD-dependent formate dehydrogenase delta subunit	2b : Function from indirect experimental evidences (e.g. phenotypes)	e : enzyme	1 : Unknown	1.7.21 : Glyoxylate degradation ;	1.2.1.2	RXN0-5253$FORMATE-DEHYDROGENASE-CYTOCHROME-RXN$1.2.1.2-RXN$FORMATE-DEHYDROGENASE-NADP+RXN$RXN0-3281$FORMATEDEHYDROG-RXN$RXN-12274$RXN0-5254	PWY-1881$PWY-6142$CODH-PWY$PWY0-1321$PWY0-1355$PWY-6772			no			6 : Energy metabolism ;
CmetNA4v1_40236	CDS	-3	777373	778068	696	automatic/finished	no			putative transglycosylase	3 : Putative function from multiple computational evidences	e : enzyme	1 : Unknown	6.2 : Peptidoglycan (murein) ;	2.4.2.-					no			14.2 : Biosynthesis and degradation of murein sacculus and peptidoglycan ;
CmetNA4v1_40237	CDS	-1	778158	779210	1053	automatic/finished	no	ldh		L-lactate dehydrogenase					1.1.1.27	L-LACTATE-DEHYDROGENASE-RXN	PWY-5481			no
CmetNA4v1_40238	CDS	-3	779269	780792	1524	automatic/finished	no			putative Sodium:sulfate symporter	3 : Putative function from multiple computational evidences	t : transporter	5 : Inner membrane protein	4.2.A.23 : The Dicarboxylate/Amino Acid:Cation (Na or H) Symporter (DAACS) Family ;						no			7 : Transport and binding proteins ;
CmetNA4v1_40239	CDS		781128	781892	765	automatic/finished	no			conserved hypothetical protein; putative exported protein; putative Protein tyrosine/serine phosphatase	4 : Unknown function but conserved in other organisms	u : unknown	1 : Unknown							no			18 : Unknown function ;
CmetNA4v1_40240	CDS	-2	781889	783106	1218	automatic/finished	no	ackA		Acetate kinase					2.7.2.1	RXN-7958$ACETATEKIN-RXN	FERMENTATION-PWY			no
CmetNA4v1_40241	CDS	-3	783130	784080	951	automatic/finished	no			putative Phosphate acetyl/butyryltransferase	3 : Putative function from multiple computational evidences	e : enzyme	1 : Unknown	1 : Metabolism ;	2.3.1.-					no			18.1 : Enzymes of unknown specificity ;
CmetNA4v1_40242	CDS		784387	786651	2265	automatic/finished	no			conserved protein of unknown function	4 : Unknown function but conserved in other organisms	u : unknown	1 : Unknown							no
CmetNA4v1_40243	CDS		786742	787521	780	automatic/finished	no	fabI	envM, qmeA, gts	enoyl-[acyl-carrier-protein] reductase (NADH)	2a : Function from experimental evidences in other organisms	e : enzyme	2 : Cytoplasmic	1.5.4 : Fatty acid and phosphatidic acid ; 7.1 : Cytoplasm ;	1.3.1.9	RXN0-2145$RXN-9663$RXN-9662$RXN-9661$RXN-9660$RXN-9659$RXN-9658$RXN-9657$RXN-11482$RXN-11478$RXN-10661$RXN-10657$ENOYL-ACP-REDUCT-NADPH-RXN$ENOYL-ACP-REDUCT-NADH-RXN	PWY0-862$PWY-5971$PWY-6519$PWY-6282$FASYN-ELONG-PWY			no	10398587		3.1 : Biosynthesis ;
CmetNA4v1_40244	CDS		787627	787869	243	automatic/finished	no	moaA		Molybdenum cofactor biosynthesis protein A 1										no
CmetNA4v1_40245	CDS		787980	788786	807	automatic/finished	no	modE	modR, chlD	transcriptional repressor for molybdate uptake	2a : Function from experimental evidences in other organisms	r : regulator	2 : Cytoplasmic	1.5.3.4 : Molybdenum (molybdopterin) ; 2.2.2 : Transcription related ; 3.1.2.3 : Repressor ; 3.3.1 : Operon (regulation of one operon) ; 7.1 : Cytoplasm ;						no	7665518		4.6 : Molybdopterin ; 9 : Transcription ; 12.1 : DNA interactions ;
CmetNA4v1_40246	CDS		788793	789332	540	automatic/finished	no			putative adenylate cyclase; CYTH family	3 : Putative function from multiple computational evidences	e : enzyme	1 : Unknown	1 : Metabolism ; 3 : Regulation ; 1.7.33 : Nucleotide and nucleoside conversions ;	4.6.1.1	ADENYLATECYC-RXN				no			2.2 : Nucleotide and nucleoside interconversions ; 12 : Regulatory functions ; 18.1 : Enzymes of unknown specificity ;
CmetNA4v1_40247	CDS	-2	789302	790024	723	automatic/finished	no	modC		molybdate transport protein; ABC transporter, ATP binding component	2a : Function from experimental evidences in other organisms	t : transporter	2 : Cytoplasmic	1.5.3.4 : Molybdenum (molybdopterin) ; 4.3.A.1.a : ATP binding component ;						no	8576221, 9302996		4.6 : Molybdopterin ; 7 : Transport and binding proteins ;
CmetNA4v1_40248	CDS	-3	790033	790749	717	automatic/finished	no	modB	chlJ	molybdate transport protein; ABC transporter, membrane component	2a : Function from experimental evidences in other organisms	t : transporter	5 : Inner membrane protein	1.5.3.4 : Molybdenum (molybdopterin) ; 4.3.A.1.m : membrane component ; 6.1 : Membrane ; 7.3 : Inner membrane ;						no	8576221, 9302996		4.6 : Molybdopterin ; 7 : Transport and binding proteins ;
CmetNA4v1_40249	CDS	-3	790768	791544	777	automatic/finished	no	modA		molybdate transport protein; ABC transporter, periplasmic binding component	2a : Function from experimental evidences in other organisms	t : transporter	9 : Periplasmic	1.5.3.4 : Molybdenum (molybdopterin) ; 4.3.A.1.p : periplasmic binding component ; 7.2 : Periplasmic space ;						no	8576221, 9302996		4.6 : Molybdopterin ; 7 : Transport and binding proteins ;
CmetNA4v1_40250	CDS		791807	793915	2109	automatic/finished	no	cpdB		2',3'-cyclic-nucleotide 2'-phosphodiesterase/3'-nucleotidase					3.1.3.6, 3.1.4.16	CYCPHOSDIESTER-RXN$3-NUCLEOTID-RXN				no
CmetNA4v1_40251	CDS		793930	794733	804	automatic/finished	no			putative tetratricopeptide repeat-like protein	3 : Putative function from multiple computational evidences									no
CmetNA4v1_40252	CDS	-1	794937	797501	2565	automatic/finished	no	htrE		Fimbrial biogenesis outer membrane usher										no
CmetNA4v1_40253	CDS	-2	797498	798268	771	automatic/finished	no	fimB		Chaperone protein fimB/fhaD										no
CmetNA4v1_40254	CDS	-1	798354	798902	549	automatic/finished	no	F17a-A		F17 fimbrial protein										no
CmetNA4v1_40255	CDS		799344	799865	522	automatic/finished	no			putative Nucleoside 2-deoxyribosyltransferase	3 : Putative function from multiple computational evidences	e : enzyme	1 : Unknown	1.5.2.2 : Pyrimidine biosynthesis ;	2.4.2.6	NUCLEOSIDE-DEOXYRIBOSYLTRANSFERASE-RXN				no			2.4 : Pyrimidine ribonucleotide biosynthesis ;
CmetNA4v1_40256	CDS	-3	799870	800457	588	automatic/finished	no			putative lipoprotein	3 : Putative function from multiple computational evidences	lp : lipoprotein	1 : Unknown							no
CmetNA4v1_40257	CDS	-1	800454	802094	1641	automatic/finished	no	pqiB	pqi5	paraquat-inducible protein B	2b : Function from indirect experimental evidences (e.g. phenotypes)	ph : phenotype	1 : Unknown	5.6.2 : Detoxification (xenobiotic metabolism) ;						no			15.5 : Detoxification ;
CmetNA4v1_40258	CDS	-3	802078	802869	792	automatic/finished	no	pqiA		Paraquat-inducible protein A	2b : Function from indirect experimental evidences (e.g. phenotypes)	ph : phenotype	5 : Inner membrane protein	5.6.2 : Detoxification (xenobiotic metabolism) ;						no			15.5 : Detoxification ;
CmetNA4v1_40259	CDS	-1	802866	803555	690	automatic/finished	no	pqiA		Paraquat-inducible protein A	2b : Function from indirect experimental evidences (e.g. phenotypes)	ph : phenotype	5 : Inner membrane protein	5.6.2 : Detoxification (xenobiotic metabolism) ;						no			15.5 : Detoxification ;
CmetNA4v1_40260	CDS	-3	803548	804651	1104	automatic/finished	no			conserved hypothetical protein, DUF20; putative membrane protein	4 : Unknown function but conserved in other organisms	u : unknown	5 : Inner membrane protein							no			18 : Unknown function ;
CmetNA4v1_40261	CDS	-1	804738	805799	1062	automatic/finished	no			conserved hypothetical protein, CBS (cystathionine-beta-synthase) domain; putative TRANSMEMBRANE PROTEIN	4 : Unknown function but conserved in other organisms	u : unknown	11 : Membrane							no			18 : Unknown function ;
CmetNA4v1_40262	CDS		806036	807829	1794	automatic/finished	no			putative CBS:Cl-channel, voltage gated	3 : Putative function from multiple computational evidences									no
CmetNA4v1_40263	CDS		807986	808864	879	automatic/finished	no			putative Amidinotransferase	3 : Putative function from multiple computational evidences	e : enzyme	1 : Unknown							no
CmetNA4v1_40264	CDS		808877	809977	1101	automatic/finished	no			Ornithine cyclodeaminase (OCD)	2b : Function from indirect experimental evidences (e.g. phenotypes)	e : enzyme	1 : Unknown	1.1.3.3 : Arginine catabolism ; 1.1.3.6 : Proline utilization ;	4.3.1.12	ORNITHINE-CYCLODEAMINASE-RXN	ARG-GLU-PWY$ORN-AMINOPENTANOATE-CAT-PWY			no			6.2 : Amino acids and amines ;
CmetNA4v1_40265	CDS	-2	810080	810745	666	automatic/finished	no			conserved hypothetical protein, DNA_binding motif	4 : Unknown function but conserved in other organisms	u : unknown	1 : Unknown							no			18 : Unknown function ;
CmetNA4v1_40266	CDS	-3	811162	812538	1377	automatic/finished	no	dctD	RS03299	C4-DICARBOXYLATE TRANSPORT RESPONSE REGULATOR TRANSCRIPTION REGULATOR PROTEIN	2b : Function from indirect experimental evidences (e.g. phenotypes)	r : regulator	2 : Cytoplasmic	3.1.2.4.3 : Two-component regulatory systems (external signal) ;						no			13.1 : Two-component systems ;
CmetNA4v1_40267	CDS	-2	812528	814450	1923	automatic/finished	no	dctB	RS03298	C4-DICARBOXYLATE TRANSPORT SENSOR KINASE TRANSCRIPTION REGULATOR PROTEIN	2b : Function from indirect experimental evidences (e.g. phenotypes)	rc : receptor	6 : Inner membrane-associated	3.1.2.4.3 : Two-component regulatory systems (external signal) ;						no			13.1 : Two-component systems ;
CmetNA4v1_40268	CDS	-2	814640	815947	1308	automatic/finished	no	dctA		citrate and C4-dicarboxylic acids transport protein (DAACS family)	2b : Function from indirect experimental evidences (e.g. phenotypes)	t : transporter	5 : Inner membrane protein	4.2.A.23 : The Dicarboxylate/Amino Acid:Cation (Na or H) Symporter (DAACS) Family ; 7.3 : Inner membrane ;						no			7 : Transport and binding proteins ;
CmetNA4v1_40269	CDS	-3	816241	819606	3366	automatic/finished	no			putative diguanylate cyclase with Mase1 and PAS domains	3 : Putative function from multiple computational evidences	e : enzyme	11 : Membrane	1.7.33 : Nucleotide and nucleoside conversions ; 3 : Regulation ;						no			2.2 : Nucleotide and nucleoside interconversions ; 12 : Regulatory functions ;
CmetNA4v1_40270	CDS		819884	820285	402	automatic/finished	no			conserved hypothetical protein	4 : Unknown function but conserved in other organisms	u : unknown	1 : Unknown							no			18 : Unknown function ;
CmetNA4v1_40271	CDS		820452	821330	879	automatic/finished	no			putative di-heme cytochrome C - signal peptide	3 : Putative function from multiple computational evidences	c : carrier	1 : Unknown	1.6.15.1 : Cytochromes ; 1.4 : Energy production/transport ;						no			6.5 : Electron transport ;
CmetNA4v1_40272	CDS		821493	821951	459	automatic/finished	no			putative isoquinoline 1-oxidoreductase (alpha subunit) oxidoreductase protein (iorA2); 2Fe-2S ferredoxin domain	3 : Putative function from multiple computational evidences	e : enzyme	1 : Unknown	1.4 : Energy production/transport ;	1.3.99.16	1.3.99.16-RXN				no			6.5 : Electron transport ;
CmetNA4v1_40273	CDS		821961	824213	2253	automatic/finished	no			putative Isoquinoline 1-oxidoreductase subunit beta (large chain) (iorB)	3 : Putative function from multiple computational evidences	e : enzyme	1 : Unknown	1.4 : Energy production/transport ;	1.3.99.16	1.3.99.16-RXN				no			6.5 : Electron transport ;
CmetNA4v1_40274	CDS	-1	824310	825110	801	automatic/finished	no			putative transmembrane transcriptional regulator (Anti-sigma factor)	3 : Putative function from multiple computational evidences									no
CmetNA4v1_40275	CDS	-3	825097	825726	630	automatic/finished	no	rpoO		RNA polymerase sigma factor										no
CmetNA4v1_40276	CDS		825969	826859	891	automatic/finished	no			Ser/Thr protein phosphatase family protein										no
CmetNA4v1_40277	CDS		826856	827230	375	automatic/finished	no			Cytochrome c oxidase subunit 2					1.9.3.1	CYTOCHROME-C-OXIDASE-RXN	PWY-3781			no
CmetNA4v1_40278	CDS	-2	827276	830476	3201	automatic/finished	no	mdtB	yegN	multidrug efflux system, subunit B	2a : Function from experimental evidences in other organisms	t : transporter	7 : Outer membrane protein	4.2.A.6 : The Resistance-Nodulation-Cell Division (RND) Superfamily ; 5.6.4 : Drug resistance/sensitivity ; 6.1 : Membrane ; 7.4 : Outer membrane ;						no	12107134		7 : Transport and binding proteins ; 15.8 : Toxin production and resistance ;
CmetNA4v1_40279	CDS	-1	830496	831875	1380	automatic/finished	no	mdtA		Multidrug resistance protein mdtA (Multidrug transporter mdtA)										no
CmetNA4v1_40280	CDS		831989	832273	285	automatic/finished	no			conserved hypothetical protein; putative transcriptional regulator	4 : Unknown function but conserved in other organisms	u : unknown	1 : Unknown							no			18 : Unknown function ;
CmetNA4v1_40281	CDS		832407	833696	1290	automatic/finished	no			putative integral membrane sensor protein	3 : Putative function from multiple computational evidences									no
CmetNA4v1_40282	CDS		833693	834916	1224	automatic/finished	no			putative esterase (Modular protein)	3 : Putative function from multiple computational evidences				3.1.1.23	3.1.1.23-RXN	LIPAS-PWY			no
CmetNA4v1_40283	CDS	-3	834913	837216	2304	automatic/finished	no			putative Patatin-like phospholipase	3 : Putative function from multiple computational evidences									no
CmetNA4v1_40284	CDS	-2	837335	839134	1800	automatic/finished	no			Sulfate transporter										no
CmetNA4v1_40285	CDS	-3	839218	840150	933	automatic/finished	no			HYDROXYMETHYLGLUTARYL-COA LYASE PROTEIN	2b : Function from indirect experimental evidences (e.g. phenotypes)	e : enzyme	2 : Cytoplasmic	1.1.3.12 : Leucine degradation ; 1.1.3.14 : Valine degradation ;	4.1.3.4	HYDROXYMETHYLGLUTARYL-COA-LYASE-RXN	LEU-DEG2-PWY			no			6.2 : Amino acids and amines ;
CmetNA4v1_40286	CDS	-3	840352	842391	2040	automatic/finished	no			putative Methylcrotonoyl-CoA carboxylase alpha subunit	3 : Putative function from multiple computational evidences	e : enzyme	1 : Unknown	1.1.3.14 : Valine degradation ; 1.1.3.12 : Leucine degradation ; 1.5.3.1 : Biotin ;	6.4.1.4	METHYLCROTONYL-COA-CARBOXYLASE-RXN	LEU-DEG2-PWY			no			4.1 : Biotin ; 6.2 : Amino acids and amines ;
CmetNA4v1_40287	CDS	-2	842405	844012	1608	automatic/finished	no			Methylcrotonoyl-CoA carboxylase beta chain	2a : Function from experimental evidences in other organisms	e : enzyme	2 : Cytoplasmic	1.1.3.14 : Valine degradation ; 1.1.3.12 : Leucine degradation ;	6.4.1.4	METHYLCROTONYL-COA-CARBOXYLASE-RXN	LEU-DEG2-PWY			no	10681539		6.2 : Amino acids and amines ;
CmetNA4v1_40288	CDS		843666	845867	2202	automatic/finished	no			conserved protein of unknown function	4 : Unknown function but conserved in other organisms	u : unknown	1 : Unknown							no
CmetNA4v1_40289	CDS	-1	844017	845729	1713	automatic/finished	no			putative Acyl-CoA synthetase (AMP-forming)/AMP-acid ligase	3 : Putative function from multiple computational evidences	e : enzyme	1 : Unknown	1.6.1 : Phospholipid ;	6.2.1.-					no			3.1 : Biosynthesis ;
CmetNA4v1_40290	CDS		845975	846721	747	automatic/finished	no			putative transcriptional regulator, TetR family	3 : Putative function from multiple computational evidences	r : regulator	2 : Cytoplasmic	3.1.2 : Transcriptional level ;						no			12.1 : DNA interactions ;
CmetNA4v1_40291	CDS		846794	847588	795	automatic/finished	no			Two component transcriptional regulator, LuxR family										no
CmetNA4v1_40292	CDS		847600	849537	1938	automatic/finished	no			putative two-component sensor histidine kinase	3 : Putative function from multiple computational evidences									no
CmetNA4v1_40293	CDS	-3	849412	854628	5217	automatic/finished	no			conserved protein of unknown function	4 : Unknown function but conserved in other organisms	u : unknown	1 : Unknown							no
CmetNA4v1_40294	CDS		854989	855279	291	automatic/finished	no	groS	TabB, groES, mopB	chaperone Hsp10 (GroES), part of GroE chaperone system	2a : Function from experimental evidences in other organisms	f : factor	2 : Cytoplasmic	2.3.4 : Chaperoning, folding ; 5.1 : Cell division ; 7.1 : Cytoplasm ;						no	9285585		11.3 : Protein folding and stabilization ; 15.1 : Cell division ;
CmetNA4v1_40295	CDS		855364	857007	1644	automatic/finished	no	groL	groEL, mopA	chaperone Hsp60 (GroEL), part of GroE chaperone system	2a : Function from experimental evidences in other organisms	f : factor	2 : Cytoplasmic	2.3.4 : Chaperoning, folding ; 5.1 : Cell division ; 7.1 : Cytoplasm ;						no	9285585		11.3 : Protein folding and stabilization ; 15.1 : Cell division ;
CmetNA4v1_40296	CDS	-1	857307	857741	435	automatic/finished	no			conserved protein of unknown function	4 : Unknown function but conserved in other organisms	u : unknown	1 : Unknown							no
CmetNA4v1_40297	CDS	-2	857738	860419	2682	automatic/finished	no	clpV		Protein ClpV1										no
CmetNA4v1_40298	CDS	-2	860504	860989	486	automatic/finished	no			conserved protein of unknown function	4 : Unknown function but conserved in other organisms	u : unknown	1 : Unknown							no
CmetNA4v1_40299	CDS	-3	861004	862722	1719	automatic/finished	no			putative OmpA/MotB (Family of outer membrane porins)	3 : Putative function from multiple computational evidences									no
CmetNA4v1_40300	CDS	-2	862733	863389	657	automatic/finished	no			conserved protein of unknown function	4 : Unknown function but conserved in other organisms	u : unknown	1 : Unknown							no
CmetNA4v1_40301	fCDS	-3	863386	863835	450	automatic/finished	pseudo			fragment of conserved hypothetical protein; DUF876 (part 2)	4 : Unknown function but conserved in other organisms	u : unknown	1 : Unknown							no			18 : Unknown function ;
CmetNA4v1_40302	fCDS	-2	863855	864736	882	automatic/finished	pseudo			fragment of conserved hypothetical protein; DUF876 (part 1)	4 : Unknown function but conserved in other organisms	u : unknown	1 : Unknown							no			18 : Unknown function ;
CmetNA4v1_40303	CDS	-2	864854	866431	1578	automatic/finished	no			conserved protein of unknown function	4 : Unknown function but conserved in other organisms	u : unknown	1 : Unknown							no
CmetNA4v1_40304	CDS	-1	866457	866972	516	automatic/finished	no			conserved protein of unknown function	4 : Unknown function but conserved in other organisms	u : unknown	1 : Unknown							no
CmetNA4v1_40305	CDS		867262	869931	2670	automatic/finished	no			Rhs element Vgr protein										no
CmetNA4v1_40306	CDS		869928	871895	1968	automatic/finished	no			putative Phospholipase D family protein	3 : Putative function from multiple computational evidences					PHOSCHOL-RXN	LIPASYN-PWY			no
CmetNA4v1_40307	CDS		871899	873206	1308	automatic/finished	no			putative sel1-like repeat; harboring protein	3 : Putative function from multiple computational evidences									no
CmetNA4v1_40308	CDS		873200	873403	204	automatic/finished	no			putative phospholipase protein	3 : Putative function from multiple computational evidences									no
CmetNA4v1_40309	CDS		873407	874705	1299	automatic/finished	no			putative sel1-like repeat; harboring protein	3 : Putative function from multiple computational evidences									no
CmetNA4v1_40310	CDS		874802	875056	255	automatic/finished	no			conserved protein of unknown function	4 : Unknown function but conserved in other organisms	u : unknown	1 : Unknown							no
CmetNA4v1_40311	CDS		875065	876300	1236	automatic/finished	no			conserved protein of unknown function	4 : Unknown function but conserved in other organisms	u : unknown	1 : Unknown							no
CmetNA4v1_40312	CDS		876297	879713	3417	automatic/finished	no			conserved membrane protein of unknown function	4 : Unknown function but conserved in other organisms	u : unknown	1 : Unknown							no
CmetNA4v1_40313	CDS		879861	881432	1572	automatic/finished	no			ImpA, N-terminal										no
CmetNA4v1_40314	CDS		881454	883274	1821	automatic/finished	no			conserved protein of unknown function	4 : Unknown function but conserved in other organisms	u : unknown	1 : Unknown							no
CmetNA4v1_40315	CDS		883292	884380	1089	automatic/finished	no			conserved protein of unknown function	4 : Unknown function but conserved in other organisms	u : unknown	1 : Unknown							no
CmetNA4v1_40316	CDS		884417	884986	570	automatic/finished	no			conserved exported protein of unknown function	4 : Unknown function but conserved in other organisms	u : unknown	1 : Unknown							no
CmetNA4v1_40317	CDS	-1	885120	885908	789	automatic/finished	no			putative Metallophosphoesterase	3 : Putative function from multiple computational evidences	e : enzyme	1 : Unknown							no
CmetNA4v1_40318	CDS	-1	886116	887087	972	automatic/finished	no	tadC		Tad secretion system, secretion accessory protein	2b : Function from indirect experimental evidences (e.g. phenotypes)	m : membrane component	5 : Inner membrane protein	6.5 : Pilus ; 4.3.A.7 : The Type IV (Conjugal DNA-Protein Transfer) Secretory Pathway (IVSP) Family ; 5.12 : Biofilm production ; 5.13 : Virulence associated ;						no	16788194, 16980493		7 : Transport and binding proteins ; 14.1 : Surface structures ; 15.9 : Pathogenesis ;
CmetNA4v1_40319	CDS	-1	887139	888116	978	automatic/finished	no	tadB		Tad secretion system, secretion accessory protein	2b : Function from indirect experimental evidences (e.g. phenotypes)	m : membrane component	5 : Inner membrane protein	6.5 : Pilus ; 4.3.A.7 : The Type IV (Conjugal DNA-Protein Transfer) Secretory Pathway (IVSP) Family ; 5.12 : Biofilm production ; 5.13 : Virulence associated ;						no	16788194, 16980493		7 : Transport and binding proteins ; 14.1 : Surface structures ; 15.9 : Pathogenesis ;
CmetNA4v1_40320	CDS	-1	888159	889529	1371	automatic/finished	no	cpaF	tadA	Tad secretion sytem protein, secretion ATPase	2a : Function from experimental evidences in other organisms	t : transporter	2 : Cytoplasmic	6.5 : Pilus ; 4.3.A.7 : The Type IV (Conjugal DNA-Protein Transfer) Secretory Pathway (IVSP) Family ; 5.12 : Biofilm production ; 5.13 : Virulence associated ;						no	11566992, 16788194, 16980493		7 : Transport and binding proteins ; 14.1 : Surface structures ; 15.9 : Pathogenesis ;
CmetNA4v1_40321	CDS	-2	889592	890785	1194	automatic/finished	no	tadZ	cpaE1	Flp pilus assembly protein, ATPase	2b : Function from indirect experimental evidences (e.g. phenotypes)	s : structure	1 : Unknown	6.5 : Pilus ; 4.3.A.7 : The Type IV (Conjugal DNA-Protein Transfer) Secretory Pathway (IVSP) Family ; 5.12 : Biofilm production ; 5.13 : Virulence associated ;						no	16788194, 16980493		7 : Transport and binding proteins ; 14.1 : Surface structures ; 15.9 : Pathogenesis ;
CmetNA4v1_40322	CDS		890190	891041	852	automatic/finished	no			protein of unknown function	5 : Unknown function	u : unknown	1 : Unknown							no
CmetNA4v1_40323	CDS	-2	890846	891304	459	automatic/finished	no			putative pseudopilin	3 : Putative function from multiple computational evidences	s : structure	1 : Unknown	6.5 : Pilus ; 4.3.A.7 : The Type IV (Conjugal DNA-Protein Transfer) Secretory Pathway (IVSP) Family ; 5.12 : Biofilm production ; 5.13 : Virulence associated ;						no	16788194, 16980493		7 : Transport and binding proteins ; 14.1 : Surface structures ; 15.9 : Pathogenesis ;
CmetNA4v1_40324	CDS	-3	891301	891831	531	automatic/finished	no			putative pseudopilin	3 : Putative function from multiple computational evidences	s : structure	1 : Unknown	6.5 : Pilus ; 4.3.A.7 : The Type IV (Conjugal DNA-Protein Transfer) Secretory Pathway (IVSP) Family ; 5.12 : Biofilm production ; 5.13 : Virulence associated ;						no	16788194, 16980493		7 : Transport and binding proteins ; 14.1 : Surface structures ; 15.9 : Pathogenesis ;
CmetNA4v1_40325	CDS	-3	891841	893145	1305	automatic/finished	no			putative flp pilus assembly protein	3 : Putative function from multiple computational evidences	m : membrane component	11 : Membrane	6.5 : Pilus ; 4.3.A.7 : The Type IV (Conjugal DNA-Protein Transfer) Secretory Pathway (IVSP) Family ; 5.12 : Biofilm production ; 5.13 : Virulence associated ;						no			7 : Transport and binding proteins ; 14.1 : Surface structures ; 15.9 : Pathogenesis ;
CmetNA4v1_40326	CDS	-2	893168	893515	348	automatic/finished	no			putative transmembrane lipoprotein	3 : Putative function from multiple computational evidences	lp : lipoprotein	11 : Membrane							no
CmetNA4v1_40327	CDS	-3	893551	895413	1863	automatic/finished	no	cpaC	RS01559	pilus assembly secretion protein	2a : Function from experimental evidences in other organisms	t : transporter	7 : Outer membrane protein	4.3.A.5 : The Type II (General) Secretory Pathway (IISP) Family ; 6.5 : Pilus ;						no			7 : Transport and binding proteins ; 14.1 : Surface structures ;
CmetNA4v1_40328	CDS	-3	895501	896346	846	automatic/finished	no	rcpC	cpaB	PILUS ASSEMBLY TRANSMEMBRANE PROTEIN	2a : Function from experimental evidences in other organisms	s : structure	11 : Membrane	6.5 : Pilus ; 4.3.A.7 : The Type IV (Conjugal DNA-Protein Transfer) Secretory Pathway (IVSP) Family ; 5.12 : Biofilm production ; 5.13 : Virulence associated ;						no	16788194, 16980493		7 : Transport and binding proteins ; 14.1 : Surface structures ; 15.9 : Pathogenesis ;
CmetNA4v1_40329	CDS	-1	896391	897803	1413	automatic/finished	no			putative ATPase, possible chaperone activity	3 : Putative function from multiple computational evidences	e : enzyme	1 : Unknown	1.4 : Energy production/transport ;						no	16788194, 16980493		6.5 : Electron transport ;
CmetNA4v1_40330	CDS	-3	897847	898350	504	automatic/finished	no	fppA	cpaA, tadV	PREPILIN PEPTIDASE TRANSMEMBRANE PROTEIN	2a : Function from experimental evidences in other organisms	e : enzyme	5 : Inner membrane protein	6.5 : Pilus ; 4.3.A.7 : The Type IV (Conjugal DNA-Protein Transfer) Secretory Pathway (IVSP) Family ; 5.12 : Biofilm production ; 5.13 : Virulence associated ; 2.3.5 : Export, signal peptide cleavage ;	3.4.23.43	3.4.23.43-RXN				no	16788194, 16980493		7 : Transport and binding proteins ; 11.1 : Protein and peptide secretion and trafficking ; 14.1 : Surface structures ; 15.9 : Pathogenesis ;
CmetNA4v1_40331	CDS	-2	898388	898561	174	automatic/finished	no	pilA		putative Flp/Fap pilin component; pilus subunit protein	3 : Putative function from multiple computational evidences									no
CmetNA4v1_40332	CDS	-1	898602	898775	174	automatic/finished	no	pilA		putative Flp/Fap pilin component; pilus subunit protein	3 : Putative function from multiple computational evidences									no
CmetNA4v1_40333	CDS	-2	898865	899038	174	automatic/finished	no	flp		Flp pilin component	2a : Function from experimental evidences in other organisms	s : structure	3 : Fimbrial	6.5 : Pilus ; 4.3.A.7 : The Type IV (Conjugal DNA-Protein Transfer) Secretory Pathway (IVSP) Family ; 5.12 : Biofilm production ; 5.13 : Virulence associated ;						no	16788194, 16980493		7 : Transport and binding proteins ; 14.1 : Surface structures ; 15.9 : Pathogenesis ;
CmetNA4v1_40334	CDS		899753	899935	183	automatic/finished	no			protein of unknown function	5 : Unknown function	u : unknown	1 : Unknown							no
CmetNA4v1_40335	CDS		900158	901414	1257	automatic/finished	no			conserved membrane protein of unknown function	4 : Unknown function but conserved in other organisms	u : unknown	1 : Unknown							no
CmetNA4v1_40336	CDS		901416	902654	1239	automatic/finished	no			putative membrane protein	3 : Putative function from multiple computational evidences	m : membrane component	5 : Inner membrane protein							no
CmetNA4v1_40337	CDS		902696	903712	1017	automatic/finished	no	yfdH		prophage-derived bactoprenol glucosyl transferase	2b : Function from indirect experimental evidences (e.g. phenotypes)	e : enzyme	8 : Outer membrane-associated	8.1 : Prophage genes and phage related functions ; 1.6.4 : Enterobacterial common antigen (surface glycolipid) ;	2.4.1.-					no			14.3 : Biosynthesis and degradation of surface polysaccharides and lipopolysaccharides ; 17.2 : Prophage functions ;
CmetNA4v1_40338	CDS	-2	903737	904963	1227	automatic/finished	no			conserved membrane protein of unknown function	4 : Unknown function but conserved in other organisms	u : unknown	1 : Unknown							no
CmetNA4v1_40339	CDS	-2	905039	905485	447	automatic/finished	no			putative membrane component, GtrA-like protein	3 : Putative function from multiple computational evidences	m : membrane component	5 : Inner membrane protein	6.3 : Surface antigens (ECA, O antigen of LPS) ;						no			14.3 : Biosynthesis and degradation of surface polysaccharides and lipopolysaccharides ;
CmetNA4v1_40340	CDS	-1	905520	906896	1377	automatic/finished	no			putative SIGMA-54 INTERACTING TRANSCRIPTIONal REGULATOR	3 : Putative function from multiple computational evidences	r : regulator	2 : Cytoplasmic	3 : Regulation ; 3.1.2.1 : Sigma factors, anti-sigmafactors ; 3.1.2 : Transcriptional level ;						no			12.1 : DNA interactions ;
CmetNA4v1_40341	CDS		907233	907406	174	automatic/finished	no			protein of unknown function	5 : Unknown function	u : unknown	1 : Unknown							no
CmetNA4v1_40342	CDS	-3	907927	908868	942	automatic/finished	no			Regulatory protein, LysR:LysR, substrate-binding	2b : Function from indirect experimental evidences (e.g. phenotypes)	r : regulator	1 : Unknown	3 : Regulation ;						no			12 : Regulatory functions ;
CmetNA4v1_40343	CDS		908946	910202	1257	automatic/finished	no			putative transporter, Major facilitator superfamily MFS_1	3 : Putative function from multiple computational evidences	t : transporter	5 : Inner membrane protein	4.2.A.1 : The Major Facilitator Superfamily (MFS) ;						no			7 : Transport and binding proteins ;
CmetNA4v1_40344	CDS		910525	911313	789	automatic/finished	no			putative integral membrane signalling protein, MHYT sensor domain	3 : Putative function from multiple computational evidences	m : membrane component	11 : Membrane	2.3 : Protein related ;						no
CmetNA4v1_40345	CDS	-3	911359	912009	651	automatic/finished	no			conserved exported protein of unknown function	4 : Unknown function but conserved in other organisms	u : unknown	1 : Unknown							no
CmetNA4v1_40346	CDS	-2	911909	912733	825	automatic/finished	no			conserved hypothetical protein, DUF477, COG1512; putative GLYCINE RICH TRANSMEMBRANE PROTEIN	4 : Unknown function but conserved in other organisms	u : unknown	11 : Membrane							no			18 : Unknown function ;
CmetNA4v1_40347	CDS	-1	912747	913349	603	automatic/finished	no			putative extracellular antigen protein, similar to Lysteria LemA	3 : Putative function from multiple computational evidences	m : membrane component	8 : Outer membrane-associated							no	8758895
CmetNA4v1_40348	CDS		913749	914657	909	automatic/finished	no	dapA		Dihydrodipicolinate synthase					4.2.1.52	DIHYDRODIPICSYN-RXN	DAPLYSINESYN-PWY			no
CmetNA4v1_40349	CDS	-3	914644	915936	1293	automatic/finished	no	hemL	popC, gsa	glutamate-1-semialdehyde aminotransferase (aminomutase), PLP-dependent	2a : Function from experimental evidences in other organisms	e : enzyme	1 : Unknown	1.5.3.12 : Heme, porphyrin ;	5.4.3.8	GSAAMINOTRANS-RXN	PWY-5188			no			4.3 : Heme, porphyrin, and cobalamin ;
CmetNA4v1_40350	CDS		916029	916352	324	automatic/finished	no			RUBREDOXIN (modular protein)										no
CmetNA4v1_40351	CDS		916679	917233	555	automatic/finished	no	pilG		Type IV pilus response regulator PilG										no
CmetNA4v1_40352	CDS		917268	917636	369	automatic/finished	no	pilH	RS01574	TWITCHING MOTILITY TWO-COMPONENT RESPONSE REGULATOR receiver, CheY family	2b : Function from indirect experimental evidences (e.g. phenotypes)	r : regulator	2 : Cytoplasmic	3.1.2.4.3 : Two-component regulatory systems (external signal) ;						no	7908398		13.1 : Two-component systems ;
CmetNA4v1_40353	CDS		917714	918256	543	automatic/finished	no	pilI	RS01575	TWITCHING MOTILITY PROTEIN, CheW domain	2b : Function from indirect experimental evidences (e.g. phenotypes)	r : regulator	1 : Unknown	3.1.2.4.3 : Two-component regulatory systems (external signal) ; 5.3 : Motility (incl. chemotaxis, energytaxis, aerotaxis, redoxtaxis) ;						no	7908398		13.1 : Two-component systems ; 15.2 : Chemotaxis and motility ;
CmetNA4v1_40354	CDS		918414	920615	2202	automatic/finished	no	pilJ		TWITCHING MOTILITY TRANSMEMBRANE PROTEIN, Methyl-accepting chemotaxis protein	2a : Function from experimental evidences in other organisms	rc : receptor	5 : Inner membrane protein	5.3 : Motility (incl. chemotaxis, energytaxis, aerotaxis, redoxtaxis) ;						no	7908398		15.2 : Chemotaxis and motility ;
CmetNA4v1_40355	CDS		920648	926641	5994	automatic/finished	no	cheW		Response regulator receiver of TWO COMPONENT REGULATORY system (SENSOR HISTIDINE KINASE AND RESPONSE REGULATOR HYBRID) TRANSCRIPTION REGULATOR PROTEIN	2b : Function from indirect experimental evidences (e.g. phenotypes)	r : regulator	2 : Cytoplasmic	3.1.2.4.3 : Two-component regulatory systems (external signal) ; 5.3 : Motility (incl. chemotaxis, energytaxis, aerotaxis, redoxtaxis) ;						no			13.1 : Two-component systems ; 15.2 : Chemotaxis and motility ;
CmetNA4v1_40356	CDS	-2	926714	928027	1314	automatic/finished	no			putative transporter, Major facilitator superfamily MFS	3 : Putative function from multiple computational evidences	t : transporter	11 : Membrane	4.2.A.1 : The Major Facilitator Superfamily (MFS) ;						no			7 : Transport and binding proteins ;
CmetNA4v1_40357	CDS	-1	928137	928898	762	automatic/finished	no			putative deshydrogenase oxydoreductase	3 : Putative function from multiple computational evidences	e : enzyme	1 : Unknown	1.4 : Energy production/transport ;	1.1.1.-					no			6.5 : Electron transport ;
CmetNA4v1_40358	CDS	-3	928969	929208	240	automatic/finished	no			conserved hypothetical protein	4 : Unknown function but conserved in other organisms	u : unknown	1 : Unknown							no			18 : Unknown function ;
CmetNA4v1_40359	CDS	-2	929201	930637	1437	automatic/finished	no	aldH		aldehyde dehydrogenase	2b : Function from indirect experimental evidences (e.g. phenotypes)	e : enzyme	2 : Cytoplasmic	1.1.1 : Carbohydrates/Carbon compounds ; 7.1 : Cytoplasm ;	1.2.1.3	RXN-12165$RXN-12166$SUCCGLUALDDEHYD-RXN$ALDEHYDE-DEHYDROGENASE-NADP+RXN$ACETALD-DEHYDROG-RXN$GLYCERALDEHYDE-DEHYDRO-RXN$RXN6666-5$RXN-12331$RXN-9758$RXN-11619$RXN-10917$RXN-10912$ALDHDEHYDROG-RXN$RXN-10780$RXN-10715$RXN-10089$R222-RXN$RXN-6382$RXN-4142$RXN-37$RXN-3443$LACTALDEHYDE-OXI-RXN$RXN-12000	PWY-6713$AST-PWY$ETOH-ACETYLCOA-ANA-PWY$PWY-5436$PWY-5162$PWY0-1297$PWY0-1298$PHOSPHONOTASE-PWY$FERMENTATION-PWY			no			6 : Energy metabolism ;
CmetNA4v1_40360	CDS		930802	931329	528	automatic/finished	no	ppa		inorganic pyrophosphatase	2a : Function from experimental evidences in other organisms	e : enzyme	2 : Cytoplasmic	1.7.1 : Unassigned reversible reactions ; 1.8.1 : Phosphorous metabolism ; 7.1 : Cytoplasm ;	3.6.1.1	INORGPYROPHOSPHAT-RXN				no			5.3 : Phosphorus compounds ;
CmetNA4v1_40361	CDS	-2	931409	932605	1197	automatic/finished	no			conserved hypothetical protein, DUF482	4 : Unknown function but conserved in other organisms	u : unknown	1 : Unknown							no			18 : Unknown function ;
CmetNA4v1_40362	CDS		932761	934824	2064	automatic/finished	no	nadE		Glutamine-dependent NAD() synthetase (NAD() synthase [glutamine-hydrolyzing])	2b : Function from indirect experimental evidences (e.g. phenotypes)	e : enzyme	1 : Unknown	1.5.3.7 : Nicotinamide adenine dinucleotide (NAD) ;	6.3.5.1	NAD-SYNTH-GLN-RXN	PYRIDNUCSAL-PWY$PYRIDNUCSYN-PWY			no			4.12 : Pyridine nucleotides ;
CmetNA4v1_40363	CDS		934938	935276	339	automatic/finished	no	glnK/B		regulatory protein (P-II) for nitrogen assimilation by glutamine synthetase (ATase)	2b : Function from indirect experimental evidences (e.g. phenotypes)	r : regulator	2 : Cytoplasmic	1.5.1.2 : Glutamine ; 2.2.2 : Transcription related ; 3.1.3.3 : Inhibition / activation of enzymes ; 7.1 : Cytoplasm ;						no	14668330		1.3 : Glutamate family ; 9 : Transcription ; 12.3 : Protein interactions ;
CmetNA4v1_40364	CDS	-1	935346	935993	648	automatic/finished	no			conserved hypothetical protein, UPF0126; putative TRANSMEMBRANE PROTEIN	4 : Unknown function but conserved in other organisms	u : unknown	11 : Membrane							no			18 : Unknown function ;
CmetNA4v1_40365	CDS	-3	936001	936675	675	automatic/finished	no			conserved hypothetical protein, smr domain	4 : Unknown function but conserved in other organisms	u : unknown	1 : Unknown							no			18 : Unknown function ;
CmetNA4v1_40366	CDS	-1	936795	937748	954	automatic/finished	no	trxB		thioredoxin reductase, FAD/NAD(P)-binding	2a : Function from experimental evidences in other organisms	e : enzyme	2 : Cytoplasmic	1.7.1 : Unassigned reversible reactions ; 7.1 : Cytoplasm ;	1.8.1.9	THIOREDOXIN-REDUCT-NADPH-RXN	THIOREDOX-PWY			no			5 : Central intermediary metabolism ;
CmetNA4v1_40367	CDS		937930	940257	2328	automatic/finished	no	ftsK	RS01205	DNA translocase	2a : Function from experimental evidences in other organisms	cp : cell process	6 : Inner membrane-associated	5.1 : Cell division ; 2.1.1 : DNA replication ;						no	11459952, 11832210		8.1 : DNA replication, recombination, and repair ; 15.1 : Cell division ;
CmetNA4v1_40368	CDS		940519	941163	645	automatic/finished	no			putative periplasmic outer membrane lipoprotein carrier protein	3 : Putative function from multiple computational evidences	m : membrane component	1 : Unknown							no
CmetNA4v1_40369	CDS		941172	941588	417	automatic/finished	no			conserved hypothetical protein	4 : Unknown function but conserved in other organisms	u : unknown	1 : Unknown							no			18 : Unknown function ;
CmetNA4v1_40370	CDS	-3	941617	941784	168	automatic/finished	no			conserved protein of unknown function	4 : Unknown function but conserved in other organisms	u : unknown	1 : Unknown							no
CmetNA4v1_40371	CDS	-3	941947	942630	684	automatic/finished	no			conserved hypothetical protein	4 : Unknown function but conserved in other organisms	u : unknown	1 : Unknown							no			18 : Unknown function ;
CmetNA4v1_40372	CDS		942897	943745	849	automatic/finished	no			putative amino-acid-binding periplasmic abc transporter protein	3 : Putative function from multiple computational evidences									no
CmetNA4v1_40373	CDS		943851	944546	696	automatic/finished	no	glnM		putative glutamine ABC transporter permease protein glnM	3 : Putative function from multiple computational evidences									no
CmetNA4v1_40374	CDS		944549	945241	693	automatic/finished	no	aapM		ABC-type transporter, permease component: PAAT family										no
CmetNA4v1_40375	CDS		945244	945993	750	automatic/finished	no	gltL		glutamate/aspartate transport protein; ABC superfamily, atp_binding component	2a : Function from experimental evidences in other organisms	t : transporter	2 : Cytoplasmic	1.5.1.1 : Glutamate ; 1.5.1.5 : Aspartate ; 4.3.A.1.a : ATP binding component ; 7.1 : Cytoplasm ;						no			1.2 : Aspartate family ; 1.3 : Glutamate family ; 7 : Transport and binding proteins ;
CmetNA4v1_40376	CDS		946108	947445	1338	automatic/finished	no	rarA	ycaJ	recombination helicase ATPase	2a : Function from experimental evidences in other organisms	cp : cell process	2 : Cytoplasmic	2.1.1 : DNA replication ; 2.1.3 : DNA recombination ;						no	11459952		8.1 : DNA replication, recombination, and repair ;
CmetNA4v1_40377	CDS		947613	948920	1308	automatic/finished	no	serS		serine tRNA synthetase; also charges selenocystein tRNA with serine	2a : Function from experimental evidences in other organisms	e : enzyme	2 : Cytoplasmic	2.3.1 : Amino acid-activation ; 7.1 : Cytoplasm ;	6.1.1.11	SERINE--TRNA-LIGASE-RXN$RXN0-2161	TRNA-CHARGING-PWY$PWY0-901			no			10.1 : tRNA aminoacylation ;
CmetNA4v1_tRNA2	tRNA		949023	949112	90	automatic/finished	no			Ser tRNA												tRNA Ser anticodon CGA, Cove score 70.97
CmetNA4v1_40378	CDS		949297	949887	591	automatic/finished	no	pinE		DNA-invertase from lambdoid prophage e14										no
CmetNA4v1_40379	CDS	-2	949892	950113	222	automatic/finished	no			protein of unknown function	5 : Unknown function	u : unknown	1 : Unknown							no
CmetNA4v1_40380	CDS	-1	950184	950651	468	automatic/finished	no	pilA		Type IV pilus structural subunit PilA										no
CmetNA4v1_40381	CDS		950686	950817	132	automatic/finished	no			protein of unknown function	5 : Unknown function	u : unknown	1 : Unknown							no
CmetNA4v1_40382	CDS	-1	950865	951755	891	automatic/finished	no			conserved protein of unknown function	4 : Unknown function but conserved in other organisms	u : unknown	1 : Unknown							no
CmetNA4v1_40383	CDS	-1	951768	951851	84	automatic/finished	no			protein of unknown function	5 : Unknown function	u : unknown	1 : Unknown							no
CmetNA4v1_40384	CDS	-2	951896	952066	171	automatic/finished	no			protein of unknown function	5 : Unknown function	u : unknown	1 : Unknown							no
CmetNA4v1_40385	CDS		952450	952764	315	automatic/finished	no			conserved protein of unknown function	4 : Unknown function but conserved in other organisms	u : unknown	1 : Unknown							no
CmetNA4v1_40386	CDS	-2	952793	952930	138	automatic/finished	no			protein of unknown function	5 : Unknown function	u : unknown	1 : Unknown							no
CmetNA4v1_40387	CDS	-1	952959	954173	1215	automatic/finished	no			Zonular occludens toxin										no
CmetNA4v1_40388	CDS	-2	954326	954652	327	automatic/finished	no			Filamentous phage phiLf protein VI										no
CmetNA4v1_40389	CDS	-3	954649	956193	1545	automatic/finished	no			conserved protein of unknown function	4 : Unknown function but conserved in other organisms	u : unknown	1 : Unknown							no
CmetNA4v1_40390	CDS	-2	956267	956488	222	automatic/finished	no			conserved exported protein of unknown function	4 : Unknown function but conserved in other organisms	u : unknown	1 : Unknown							no
CmetNA4v1_40391	CDS	-3	956734	956976	243	automatic/finished	no			conserved protein of unknown function	4 : Unknown function but conserved in other organisms	u : unknown	1 : Unknown							no
CmetNA4v1_40392	CDS	-3	957001	957165	165	automatic/finished	no			protein of unknown function	5 : Unknown function	u : unknown	1 : Unknown							no
CmetNA4v1_40393	CDS	-2	957278	957700	423	automatic/finished	no			protein of unknown function	5 : Unknown function	u : unknown	1 : Unknown							no
CmetNA4v1_40394	CDS	-1	957753	958061	309	automatic/finished	no			conserved protein of unknown function	4 : Unknown function but conserved in other organisms	u : unknown	1 : Unknown							no
CmetNA4v1_40395	CDS		958224	958511	288	automatic/finished	no			protein of unknown function	5 : Unknown function	u : unknown	1 : Unknown							no
CmetNA4v1_40396	CDS		958647	958958	312	automatic/finished	no			DNA-invertase from lambdoid prophage e14 (fragment)										no
CmetNA4v1_40397	CDS	-3	959176	959637	462	automatic/finished	no	tfpQ		Fimbrial protein Q										no
CmetNA4v1_40398	CDS	-3	959887	961203	1317	automatic/finished	no			putative hemolysin-related membrane protein; putative Mg2 and Co2 transporter	3 : Putative function from multiple computational evidences	m : membrane component	1 : Unknown							no
CmetNA4v1_40399	CDS	-2	961286	962239	954	automatic/finished	no			putative transcriptional regulator, LysR family	3 : Putative function from multiple computational evidences	r : regulator	2 : Cytoplasmic	3.1.2 : Transcriptional level ;						no			12.1 : DNA interactions ;
CmetNA4v1_40400	CDS		962444	963721	1278	automatic/finished	no	dadA		D-amino acid dehydrogenase 2 small subunit	2a : Function from experimental evidences in other organisms	e : enzyme	1 : Unknown	1.1.3.15 : Phenylalanine, tyrosine degradation ; 1.8.3 : Nitrogen metabolism ;	1.4.99.1	RXN-12648$RXN-11193$DALADEHYDROG-RXN$RXN0-6684$RXN0-5259$RXN0-6678	ALADEG-PWY			no			5.7 : Nitrogen metabolism ; 6.2 : Amino acids and amines ;
CmetNA4v1_40401	CDS		963810	964718	909	automatic/finished	no	gltI	ybeJ, yzzK	glutamate/aspartate ABC transporter,periplasmic binding component	2b : Function from indirect experimental evidences (e.g. phenotypes)	t : transporter	9 : Periplasmic	1.5.1.1 : Glutamate ; 4.3.A.1.p : periplasmic binding component ; 7.2 : Periplasmic space ;						no			1.3 : Glutamate family ; 7 : Transport and binding proteins ;
CmetNA4v1_40402	CDS	-3	964897	965373	477	automatic/finished	no			conserved protein of unknown function	4 : Unknown function but conserved in other organisms	u : unknown	1 : Unknown							no
CmetNA4v1_40403	CDS	-3	965611	968181	2571	automatic/finished	no			Cyanophycin synthetase	2b : Function from indirect experimental evidences (e.g. phenotypes)	e : enzyme	1 : Unknown	6.2 : Peptidoglycan (murein) ;	6.3.2.-					no			14.2 : Biosynthesis and degradation of murein sacculus and peptidoglycan ;
CmetNA4v1_40404	CDS	-3	968218	970869	2652	automatic/finished	no			Cyanophycin synthetase	2b : Function from indirect experimental evidences (e.g. phenotypes)	e : enzyme	1 : Unknown	6.2 : Peptidoglycan (murein) ;	6.3.2.-					no	11479698, 11976746		14.2 : Biosynthesis and degradation of murein sacculus and peptidoglycan ;
CmetNA4v1_40405	CDS		970956	971153	198	automatic/finished	no			protein of unknown function	5 : Unknown function	u : unknown	1 : Unknown							no
CmetNA4v1_40406	CDS		971164	973467	2304	automatic/finished	no			putative ABC transporter, ATP-binding membrane component	3 : Putative function from multiple computational evidences	t : transporter	11 : Membrane	4.3.A.1.am : ATP binding and membrane component ;						no			7 : Transport and binding proteins ;
CmetNA4v1_40407	CDS		973502	973972	471	automatic/finished	no			conserved hypothetical protein	4 : Unknown function but conserved in other organisms	u : unknown	1 : Unknown							no			18 : Unknown function ;
CmetNA4v1_40408	CDS	-3	974071	974472	402	automatic/finished	no			conserved hypothetical protein	4 : Unknown function but conserved in other organisms	u : unknown	1 : Unknown							no			18 : Unknown function ;
CmetNA4v1_40409	CDS	-1	974652	974984	333	automatic/finished	no			conserved protein of unknown function	4 : Unknown function but conserved in other organisms	u : unknown	1 : Unknown							no
CmetNA4v1_40410	CDS		975014	975385	372	automatic/finished	no			conserved protein of unknown function	4 : Unknown function but conserved in other organisms	u : unknown	1 : Unknown							no
CmetNA4v1_40411	CDS		976118	976234	117	automatic/finished	no			protein of unknown function	5 : Unknown function	u : unknown	1 : Unknown							no
CmetNA4v1_40412	CDS		976332	976736	405	automatic/finished	no			exported protein of unknown function	5 : Unknown function	u : unknown	1 : Unknown							no
CmetNA4v1_40413	CDS		976798	977100	303	automatic/finished	no			protein of unknown function	5 : Unknown function	u : unknown	1 : Unknown							no
CmetNA4v1_40414	CDS	-1	977241	979400	2160	automatic/finished	no			putative KAP P-loop domain protein	3 : Putative function from multiple computational evidences									no
CmetNA4v1_40415	CDS	-2	979487	980050	564	automatic/finished	no			protein of unknown function	5 : Unknown function	u : unknown	1 : Unknown							no
CmetNA4v1_40416	CDS	-3	980743	983472	2730	automatic/finished	no			conserved protein of unknown function	4 : Unknown function but conserved in other organisms	u : unknown	1 : Unknown							no
CmetNA4v1_40417	CDS	-1	983556	984008	453	automatic/finished	no			protein of unknown function	5 : Unknown function	u : unknown	1 : Unknown							no
CmetNA4v1_40418	CDS	-2	984005	984310	306	automatic/finished	no			protein of unknown function	5 : Unknown function	u : unknown	1 : Unknown							no
CmetNA4v1_40419	CDS	-3	984310	984636	327	automatic/finished	no			protein of unknown function	5 : Unknown function	u : unknown	1 : Unknown							no
CmetNA4v1_40420	CDS	-2	984983	986230	1248	automatic/finished	no			putative integrase	3 : Putative function from multiple computational evidences									no
CmetNA4v1_tmRNA1	tmRNA	-1	986455	986814	360	automatic/finished	no			tmRNA												Predicted by Rfam, accession=RF00023, e-value=2.8e-55.
CmetNA4v1_40421	CDS	-2	986888	987544	657	automatic/finished	no			putative 2-phosphoglycolate phosphatase	3 : Putative function from multiple computational evidences	e : enzyme	1 : Unknown	1.7.21 : Glyoxylate degradation ;	3.1.3.18	GPH-RXN				no			6 : Energy metabolism ;
CmetNA4v1_40422	CDS		986918	989215	2298	automatic/finished	no			protein of unknown function	5 : Unknown function	u : unknown	1 : Unknown							no
CmetNA4v1_40423	CDS	-2	987548	988291	744	automatic/finished	no	ubiG	yfaB, pufX	bifunctional: 3-demethylubiquinone-9 3-methyltransferase; 2-octaprenyl-6-hydroxy phenol methylase	2b : Function from indirect experimental evidences (e.g. phenotypes)	e : enzyme	5 : Inner membrane protein	1.3.6 : Aerobic respiration ; 1.5.3.11 : Menaquinone (MK), ubiquinone (Q) ; 6.1 : Membrane ; 7.3 : Inner membrane ;	2.1.1.64	DHHB-METHYLTRANSFER-RXN$2-OCTAPRENYL-6-OHPHENOL-METHY-RXN	PWY-6708			no			4.5 : Menaquinone and ubiquinone ; 6.1 : Aerobic ;
CmetNA4v1_40424	CDS	-2	988391	989044	654	automatic/finished	no			putative outer membrane protein, ompA domain	3 : Putative function from multiple computational evidences	m : membrane component	7 : Outer membrane protein	6.1 : Membrane ;						no
CmetNA4v1_40425	CDS	-3	989227	989499	273	automatic/finished	no			putative lipoprotein	3 : Putative function from multiple computational evidences									no
CmetNA4v1_40426	CDS		989491	992184	2694	automatic/finished	no	gyrA	hisW, nalA, parD, norA	DNA gyrase, subunit A, type II topoisomerase	2a : Function from experimental evidences in other organisms	e : enzyme	2 : Cytoplasmic	2.1.1 : DNA replication ; 2.2.2 : Transcription related ; 3.1.1.1 : DNA bending, supercoiling, inversion ; 7.1 : Cytoplasm ;	5.99.1.3	5.99.1.3-RXN				no			8.1 : DNA replication, recombination, and repair ; 9 : Transcription ; 12 : Regulatory functions ;
CmetNA4v1_40427	CDS		992267	992836	570	automatic/finished	no			conserved hypothetical protein, putative exported protein	4 : Unknown function but conserved in other organisms	u : unknown	1 : Unknown							no			18 : Unknown function ;
CmetNA4v1_40428	CDS		993005	994168	1164	automatic/finished	no	serC	pdxC, pdxF	3-phosphoserine/phosphohydroxythreonine aminotransferase	2a : Function from experimental evidences in other organisms	e : enzyme	2 : Cytoplasmic	1.5.1.11 : Serine ; 7.1 : Cytoplasm ;	2.6.1.52	PSERTRANSAMPYR-RXN$PSERTRANSAM-RXN	PYRIDOXSYN-PWY$SERSYN-PWY			no			1.5 : Serine family ;
CmetNA4v1_40429	CDS		994269	995432	1164	automatic/finished	no	pheA	RS04511	fused chorismate mutase P ; prephenate dehydratase	2a : Function from experimental evidences in other organisms	e : enzyme	2 : Cytoplasmic	1.5.1.13 : Phenylalanine ; 1.5.1.14 : Tyrosine ;	5.4.99.5, 4.2.1.51	CHORISMATEMUT-RXN$PREPHENATEDEHYDRAT-RXN	PHESYN$PWY-6120$TYRSYN			no			1.1 : Aromatic amino acid family ;
CmetNA4v1_40430	CDS		995452	996576	1125	automatic/finished	no	hisC	RS04510	HISTIDINOL-PHOSPHATE AMINOTRANSFERASE	2a : Function from experimental evidences in other organisms	e : enzyme	2 : Cytoplasmic	1.5.1.13 : Phenylalanine ; 1.5.1.14 : Tyrosine ; 1.5.1.15 : Tryptophan ; 1.5.1.16 : Histidine ;	2.6.1.9	HISTAMINOTRANS-RXN	HISTSYN-PWY			no			1.1 : Aromatic amino acid family ; 1.6 : Histidine family ;
CmetNA4v1_40431	CDS		996586	997494	909	automatic/finished	no	tyrA	RS04509	PREPHENATE/Arogenate DEHYDROGENASE	2a : Function from experimental evidences in other organisms	e : enzyme	1 : Unknown	1.5.1.13 : Phenylalanine ; 1.5.1.14 : Tyrosine ; 1.5.1.15 : Tryptophan ;	1.3.1.12, 1.3.1.43	PREPHENATEDEHYDROG-RXN$CYCLOHEXADIENYL-DEHYDROGENASE-RXN	TYRSYN$PWY-6120			no			1.1 : Aromatic amino acid family ;
CmetNA4v1_40432	CDS		997494	998852	1359	automatic/finished	no	aroA		3-enolpyruvylshikimate-5-phosphate synthetase	2a : Function from experimental evidences in other organisms	e : enzyme	1 : Unknown	1.5.1.20 : Chorismate ;	2.5.1.19	2.5.1.19-RXN	PWY-6163			no			1.1 : Aromatic amino acid family ;
CmetNA4v1_40433	CDS	-1	998880	999110	231	automatic/finished	no			conserved hypothetical protein; putative exported protein	4 : Unknown function but conserved in other organisms	u : unknown	1 : Unknown							no			18 : Unknown function ;
CmetNA4v1_40434	CDS		999270	999929	660	automatic/finished	no	cmk	mssA, ycaG, ycaF	cytidine monophosphate (CMP) kinase	2a : Function from experimental evidences in other organisms	e : enzyme	2 : Cytoplasmic	1.5.2.4 : Pyrimidine ribonucleotide/ribonucleoside biosynthesis ; 1.7.33 : Nucleotide and nucleoside conversions ; 7.1 : Cytoplasm ;	2.7.4.14	RXN-11831$RXN-11832	P1-PWY$PWY0-163			no			2.2 : Nucleotide and nucleoside interconversions ; 2.4 : Pyrimidine ribonucleotide biosynthesis ;
CmetNA4v1_40435	CDS		1000073	1001767	1695	automatic/finished	no	rpsA	ssyF	30S ribosomal subunit protein S1	2a : Function from experimental evidences in other organisms	s : structure	2 : Cytoplasmic	2.3.2 : Translation ; 2.3.8 : Ribosomal proteins ; 6.6 : Ribosome ; 7.1 : Cytoplasm ;						no			10.2 : Ribosomal proteins: synthesis and modification ; 10.4 : Translation factors ;
CmetNA4v1_40436	CDS		1001801	1002208	408	automatic/finished	no	ihfB		Integration host factor, beta subunit	2a : Function from experimental evidences in other organisms	r : regulator	2 : Cytoplasmic	2.1.3 : DNA recombination ; 2.3.7 : Nucleoproteins, basic proteins ; 3.1.1.1 : DNA bending, supercoiling, inversion ;						no	8980235		8.1 : DNA replication, recombination, and repair ; 8.4 : Chromosome-associated proteins ; 12 : Regulatory functions ;
CmetNA4v1_40437	CDS		1002437	1002760	324	automatic/finished	no			conserved hypothetical protein; putative TRANSMEMBRANE PROTEIN	4 : Unknown function but conserved in other organisms	u : unknown	1 : Unknown							no			18 : Unknown function ;
CmetNA4v1_40438	CDS		1002764	1003993	1230	automatic/finished	no			conserved hypothetical protein; putative TRANSMEMBRANE PROTEIN	4 : Unknown function but conserved in other organisms	u : unknown	1 : Unknown							no			18 : Unknown function ;
CmetNA4v1_40439	CDS		1004051	1005424	1374	automatic/finished	no	ugd	RS04502	UDP-GLUCOSE 6-DEHYDROGENASE	2a : Function from experimental evidences in other organisms	e : enzyme	1 : Unknown	6.7 : Capsule (M and K antigens) ;	1.1.1.22	UGD-RXN	COLANSYN-PWY			no	9765575		14.3 : Biosynthesis and degradation of surface polysaccharides and lipopolysaccharides ;
CmetNA4v1_40440	CDS		1005504	1006448	945	automatic/finished	no	rfaE	RS04501	ADP-HEPTOSE SYNTHASE PROTEIN (fused heptose 7-phosphate kinase ; heptose 1-phosphate adenyltransferase)	2a : Function from experimental evidences in other organisms	e : enzyme	1 : Unknown	1.6.3.2 : Core region ;	2.7.-.-	RXN0-4342$RXN0-4341	PWY0-1241			no			14.3 : Biosynthesis and degradation of surface polysaccharides and lipopolysaccharides ;
CmetNA4v1_40441	CDS		1006475	1007470	996	automatic/finished	no	rfaD	hldD, gmhD, htrM, waaD	ADP-L-glycero-D-mannoheptose-6-epimerase, NAD(P)-binding	2a : Function from experimental evidences in other organisms	e : enzyme	1 : Unknown	1.5.3.7 : Nicotinamide adenine dinucleotide (NAD) ; 1.6.3.2 : Core region ; 6.3 : Surface antigens (ECA, O antigen of LPS) ;	5.1.3.20	5.1.3.20-RXN	PWY0-1241			no			4.12 : Pyridine nucleotides ; 14.3 : Biosynthesis and degradation of surface polysaccharides and lipopolysaccharides ;
CmetNA4v1_40442	CDS		1007680	1008060	381	automatic/finished	no			conserved exported protein of unknown function	4 : Unknown function but conserved in other organisms	u : unknown	1 : Unknown							no
CmetNA4v1_40443	CDS		1008158	1009606	1449	automatic/finished	no	rutG	ycdG	pyrimidine permease (putative)	2b : Function from indirect experimental evidences (e.g. phenotypes)	t : transporter	5 : Inner membrane protein	4.2.A.40 : The Nucleobase:Cation Symporter-2 (NCS2) Family ; 6.1 : Membrane ; 7.3 : Inner membrane ;						no			7 : Transport and binding proteins ;
CmetNA4v1_40444	CDS		1009684	1010619	936	automatic/finished	no	cysM		cysteine synthase B (O-acetylserine sulfhydrolase B)	2a : Function from experimental evidences in other organisms	e : enzyme	1 : Unknown	1.5.1.12 : Cysteine ;	2.5.1.47	LCYSDESULF-RXN$ACSERLY-RXN	LCYSDEG-PWY$CYSTSYN-PWY			no	15952768, 2188958		1.5 : Serine family ;
CmetNA4v1_40445	CDS	-2	1010699	1011925	1227	automatic/finished	no	mltB		membrane-bound lytic murein transglycosylase B, putative precursor	2a : Function from experimental evidences in other organisms	e : enzyme	7 : Outer membrane protein	1.6.7 : Peptidoglycan (murein) ; 5.1 : Cell division ; 6.2 : Peptidoglycan (murein) ; 7.4 : Outer membrane ;	3.2.1.-	RXN0-5190				no			14.2 : Biosynthesis and degradation of murein sacculus and peptidoglycan ; 15.1 : Cell division ;
CmetNA4v1_40446	CDS		1011970	1012893	924	automatic/finished	no			putative enzyme, Histone deacetylase superfamily	3 : Putative function from multiple computational evidences	e : enzyme	1 : Unknown							no
CmetNA4v1_40447	CDS		1013067	1014101	1035	automatic/finished	no	metN	metD, abc	D- and L-methionine ABC transporter, atp_binding component	2a : Function from experimental evidences in other organisms	t : transporter	2 : Cytoplasmic	4.3.A.1.a : ATP binding component ; 7.1 : Cytoplasm ;						no			7 : Transport and binding proteins ;
CmetNA4v1_40448	CDS		1014091	1014744	654	automatic/finished	no	metI	metD, yaeE	D- and L-methionine ABC transporter, membrane component	2a : Function from experimental evidences in other organisms	t : transporter	5 : Inner membrane protein	4.3.A.1.m : membrane component ; 6.1 : Membrane ; 7.3 : Inner membrane ;						no			7 : Transport and binding proteins ;
CmetNA4v1_40449	CDS		1014811	1015605	795	automatic/finished	no	metQ	metD, yaeC	D- and L-methionine ABC transporter, periplasmic component	2a : Function from experimental evidences in other organisms	t : transporter	9 : Periplasmic	4.3.A.1.p : periplasmic binding component ; 6.1 : Membrane ; 7.2 : Periplasmic space ;						no			7 : Transport and binding proteins ;
CmetNA4v1_40450	CDS		1015818	1016567	750	automatic/finished	no	etfB	RS04491	ELECTRON TRANSFER FLAVOPROTEIN, BETA-SUBUNIT	2b : Function from indirect experimental evidences (e.g. phenotypes)	c : carrier	1 : Unknown	1.4.3 : Electron carrier ;						no			6.5 : Electron transport ;
CmetNA4v1_40451	CDS		1016586	1017521	936	automatic/finished	no	etfA	RS04490	ELECTRON TRANSFER FLAVOPROTEIN, ALPHA-SUBUNIT	2b : Function from indirect experimental evidences (e.g. phenotypes)	c : carrier	1 : Unknown	1.4.3 : Electron carrier ;						no			6.5 : Electron transport ;
CmetNA4v1_40452	CDS		1017642	1019426	1785	automatic/finished	no			putative ACYL-COA DEHYDROGENASE OXIDOREDUCTASE	3 : Putative function from multiple computational evidences	e : enzyme	1 : Unknown	1.4 : Energy production/transport ;	1.3.99.-					no			6.5 : Electron transport ;
CmetNA4v1_40453	CDS	-1	1019505	1020809	1305	automatic/finished	no	dadA	dadR	D-amino acid dehydrogenase subunit	2a : Function from experimental evidences in other organisms	e : enzyme	1 : Unknown	1.1.3.1 : L-alanine degradation ;	1.4.99.1	RXN-12648$RXN-11193$DALADEHYDROG-RXN$RXN0-6684$RXN0-5259$RXN0-6678	ALADEG-PWY			no			6.2 : Amino acids and amines ;
CmetNA4v1_40454	CDS		1020918	1021427	510	automatic/finished	no	lrp	alsB, livR, lss, lstR	leucine-binding transcriptional regulator	2a : Function from experimental evidences in other organisms	r : regulator	2 : Cytoplasmic	1.5.1.18 : Isoleucine/valine ; 1.5.1.19 : Leucine ; 2.2.2 : Transcription related ; 2.3.7 : Nucleoproteins, basic proteins ; 3.1.2.2 : Activator ; 3.1.2.3 : Repressor ; 3.3.1 : Operon (regulation of one operon) ; 7.1 : Cytoplasm ;						no			1.4 : Pyruvate family ; 8.4 : Chromosome-associated proteins ; 9 : Transcription ; 12.1 : DNA interactions ;
CmetNA4v1_40455	CDS	-3	1021447	1022532	1086	automatic/finished	no			conserved hypothetical protein, DUF85, SAM radical	4 : Unknown function but conserved in other organisms	u : unknown	1 : Unknown							no			18 : Unknown function ;
CmetNA4v1_40456	CDS	-1	1022667	1023599	933	automatic/finished	no			Transcriptional regulator, LysR-family										no
CmetNA4v1_40457	CDS	-2	1023632	1024123	492	automatic/finished	no			conserved hypothetical protein; putative TRANSMEMBRANE PROTEIN	4 : Unknown function but conserved in other organisms	u : unknown	1 : Unknown							no			18 : Unknown function ;
CmetNA4v1_40458	CDS	-3	1024588	1025001	414	automatic/finished	no			conserved hypothetical protein; putative exported protein	4 : Unknown function but conserved in other organisms	u : unknown	1 : Unknown							no			18 : Unknown function ;
CmetNA4v1_40459	CDS	-2	1025186	1026319	1134	automatic/finished	no			putative quinone deshydrogenase	3 : Putative function from multiple computational evidences	e : enzyme	1 : Unknown	1 : Metabolism ;	1.-.-.-					no			18.1 : Enzymes of unknown specificity ;
CmetNA4v1_40460	CDS		1026495	1026746	252	automatic/finished	no	rpsP		30S ribosomal subunit protein S16	2a : Function from experimental evidences in other organisms	s : structure	2 : Cytoplasmic	2.3.2 : Translation ; 2.3.8 : Ribosomal proteins ; 6.6 : Ribosome ; 7.1 : Cytoplasm ;						no			10.2 : Ribosomal proteins: synthesis and modification ; 10.4 : Translation factors ;
CmetNA4v1_40461	CDS		1026805	1027467	663	automatic/finished	no	rimM	RS04480	16S rRNA PROCESSING PROTEIN	2b : Function from indirect experimental evidences (e.g. phenotypes)	e : enzyme	2 : Cytoplasmic	2.2.3 : RNA modification ;						no			9.4 : RNA processing ; 10.3 : tRNA and rRNA base modification ;
CmetNA4v1_40462	CDS		1027487	1028269	783	automatic/finished	no	trmD		tRNA (guanine-7-)-methyltransferase	2a : Function from experimental evidences in other organisms	e : enzyme	2 : Cytoplasmic	2.2.3 : RNA modification ; 7.1 : Cytoplasm ;	2.1.1.31	RXN-12458				no			9.4 : RNA processing ; 10.3 : tRNA and rRNA base modification ;
CmetNA4v1_40463	CDS		1028344	1028736	393	automatic/finished	no	rplS		50S ribosomal subunit protein L19	2a : Function from experimental evidences in other organisms	s : structure	2 : Cytoplasmic	2.3.2 : Translation ; 2.3.8 : Ribosomal proteins ; 6.6 : Ribosome ; 7.1 : Cytoplasm ;						no			10.2 : Ribosomal proteins: synthesis and modification ; 10.4 : Translation factors ;
CmetNA4v1_40464	CDS		1028883	1029563	681	automatic/finished	no			putative hydrolase, NUDIX domain	3 : Putative function from multiple computational evidences	e : enzyme	1 : Unknown							no
CmetNA4v1_40465	CDS	-3	1029595	1030443	849	automatic/finished	no			conserved hypothetical protein; putative sulfurtransferase, Rhodanese family	4 : Unknown function but conserved in other organisms	u : unknown	1 : Unknown							no			18 : Unknown function ;
CmetNA4v1_40466	CDS		1030594	1034124	3531	automatic/finished	no	dnaE	polC, sdgC	DNA polymerase III, alpha subunit	2a : Function from experimental evidences in other organisms	e : enzyme	2 : Cytoplasmic	2.1.1 : DNA replication ; 7.1 : Cytoplasm ;	2.7.7.7	DNA-DIRECTED-DNA-POLYMERASE-RXN				no	1575709		8.1 : DNA replication, recombination, and repair ;
CmetNA4v1_40467	CDS		1034117	1035379	1263	automatic/finished	no			putative glycosyl transferase (LPS biosynthesis-related)	3 : Putative function from multiple computational evidences				4.1.1.65	PHOSPHASERDECARB-RXN	PWY-5669			no
CmetNA4v1_40468	CDS	-1	1035312	1036139	828	automatic/finished	no	lgtF		GLYCOSYL TRANSFERASE F, potentially involved in core lipopolysaccharide biosynthesis	2b : Function from indirect experimental evidences (e.g. phenotypes)	e : enzyme	1 : Unknown	1.6.3 : Lipopolysaccharide ;	2.4.-.-					no	12055303		14.3 : Biosynthesis and degradation of surface polysaccharides and lipopolysaccharides ;
CmetNA4v1_40469	CDS		1036191	1037957	1767	automatic/finished	no	msbA		lipidA exportABC system; composite ATP-binding membrane component	2a : Function from experimental evidences in other organisms	t : transporter	6 : Inner membrane-associated	1.6.1 : Phospholipid ; 1.6.3.3 : Lipid A ; 4.3.A.1.am : ATP binding and membrane component ;		3.6.3.39-RXN				no	9575204		3.1 : Biosynthesis ; 7 : Transport and binding proteins ; 14.3 : Biosynthesis and degradation of surface polysaccharides and lipopolysaccharides ;
CmetNA4v1_40470	CDS		1038042	1038626	585	automatic/finished	no			conserved hypothetical protein; putative peroxidase-related enzyme	4 : Unknown function but conserved in other organisms	u : unknown	1 : Unknown							no			18 : Unknown function ;
CmetNA4v1_40471	CDS	-1	1038657	1039157	501	automatic/finished	no			putative outer membrane lipoprotein	3 : Putative function from multiple computational evidences	lp : lipoprotein	6 : Inner membrane-associated							no
CmetNA4v1_40472	CDS	-3	1039411	1040610	1200	automatic/finished	no	phnM		C-P (carbon-phosphorous) lyase component; membrane associated; metallo-dependent hydrolase domain	2b : Function from indirect experimental evidences (e.g. phenotypes)	e : enzyme	5 : Inner membrane protein	1.8.1 : Phosphorous metabolism ;		RXN0-6733	PWY0-1533			no	1840580, 1846145, 8388873		5.3 : Phosphorus compounds ;
CmetNA4v1_40473	CDS	-2	1040630	1041361	732	automatic/finished	no	phnL		phosphonate transport protein (ABC superfamily, atp_bind)/ C-P (carbon-phosphorous) lyase component; membrane associated	2b : Function from indirect experimental evidences (e.g. phenotypes)	t : transporter	1 : Unknown	1.8.1 : Phosphorous metabolism ; 4.3.A.1.a : ATP binding component ;		RXN0-6732	PWY0-1533			no	1840580, 1846145, 8388873		5.3 : Phosphorus compounds ; 7 : Transport and binding proteins ;
CmetNA4v1_40474	CDS	-3	1041358	1042134	777	automatic/finished	no	phnK		phosphonate transport protein (ABC superfamily, atp_bind)/ C-P (carbon-phosphorous) lyase component; membrane associated	2b : Function from indirect experimental evidences (e.g. phenotypes)	t : transporter	1 : Unknown	1.8.1 : Phosphorous metabolism ; 4.3.A.1.a : ATP binding component ;						no	1840580, 1846145, 8388873		5.3 : Phosphorus compounds ; 7 : Transport and binding proteins ;
CmetNA4v1_40475	CDS	-1	1042131	1043018	888	automatic/finished	no	phnJ		C-P (carbon-phosphorous) lyase component; membrane associated	2b : Function from indirect experimental evidences (e.g. phenotypes)	e : enzyme	1 : Unknown	1.8.1 : Phosphorous metabolism ;		RXN0-6734	PWY0-1533			no	1840580, 1846145, 8388873		5.3 : Phosphorus compounds ;
CmetNA4v1_40476	CDS	-2	1043015	1044136	1122	automatic/finished	no	phnI		C-P (carbon-phosphorous) lyase component; putative membrane associated	2b : Function from indirect experimental evidences (e.g. phenotypes)	e : enzyme	1 : Unknown	1.8.1 : Phosphorous metabolism ;		RXN0-6732	PWY0-1533			no	1840580, 1846145, 8388873		5.3 : Phosphorus compounds ;
CmetNA4v1_40477	CDS	-1	1044138	1044755	618	automatic/finished	no	phnH		carbon-phosphorus lyase complex subunit	2a : Function from experimental evidences in other organisms	e : enzyme	1 : Unknown	1.8.1 : Phosphorous metabolism ;		RXN0-6732	PWY0-1533			no	1840580, 1846145, 8388873		5.3 : Phosphorus compounds ;
CmetNA4v1_40478	CDS	-3	1044757	1045245	489	automatic/finished	no	phnG		C-P (carbon-phosphorous) lyase component; membrane associated	2b : Function from indirect experimental evidences (e.g. phenotypes)	e : enzyme	1 : Unknown	1.8.1 : Phosphorous metabolism ;		RXN0-6732	PWY0-1533			no	1840580, 1846145, 8388873		5.3 : Phosphorus compounds ;
CmetNA4v1_40479	CDS		1045429	1046163	735	automatic/finished	no	phnF		transcriptional regulator, GntR family; putative regulator for phosphonate uptake and biodegradation system	2b : Function from indirect experimental evidences (e.g. phenotypes)	r : regulator	1 : Unknown	1.8.1 : Phosphorous metabolism ; 2.2.2 : Transcription related ;						no	1840580, 1846145, 8388873		5.3 : Phosphorus compounds ; 9 : Transcription ;
CmetNA4v1_40480	CDS		1046256	1047479	1224	automatic/finished	no	phnM		Metal-dependent hydrolase involved in phosphonate metabolism										no
CmetNA4v1_40481	CDS		1047476	1048210	735	automatic/finished	no			conserved hypothetical protein; DUF1045	4 : Unknown function but conserved in other organisms	u : unknown	1 : Unknown							no	1840580, 1846145, 8388873		18 : Unknown function ;
CmetNA4v1_40482	CDS		1048207	1048794	588	automatic/finished	no	phnN		Phosphonates transport system accessory protein; putative Guanylate kinase (GMP kinase)	2b : Function from indirect experimental evidences (e.g. phenotypes)	e : enzyme	2 : Cytoplasmic	1.8.1 : Phosphorous metabolism ;	2.7.4.8	RXN0-1401	PWY0-661			no	1840580, 1846145, 8388873		5.3 : Phosphorus compounds ;
CmetNA4v1_40483	CDS	-1	1048947	1049414	468	automatic/finished	no	phnO		Phosphonates transport system; putative Acetyltransferase; GCN5-related N-acetyltransferase domain	2b : Function from indirect experimental evidences (e.g. phenotypes)	e : enzyme	1 : Unknown	1.8.1 : Phosphorous metabolism ;						no	1840580, 1846145, 8388873		5.3 : Phosphorus compounds ;
CmetNA4v1_40484	CDS	-2	1049411	1049950	540	automatic/finished	no			conserved protein of unknown function	4 : Unknown function but conserved in other organisms	u : unknown	1 : Unknown							no
CmetNA4v1_40485	CDS	-3	1049947	1050759	813	automatic/finished	no	phnE		Phosphonates transport system permease protein; membrane protein	2a : Function from experimental evidences in other organisms	m : membrane component	5 : Inner membrane protein	1.8.1 : Phosphorous metabolism ;						no	1840580, 1846145, 8388873		5.3 : Phosphorus compounds ;
CmetNA4v1_40486	CDS	-2	1050842	1051822	981	automatic/finished	no	phnD	psiD	phosphonate transport protein, binding protein	2a : Function from experimental evidences in other organisms	t : transporter	9 : Periplasmic	1.8.1 : Phosphorous metabolism ; 4.3.A.1.p : periplasmic binding component ; 7.2 : Periplasmic space ;						no	1840580, 1846145, 8388873		5.3 : Phosphorus compounds ; 7 : Transport and binding proteins ;
CmetNA4v1_40487	CDS	-3	1051948	1052802	855	automatic/finished	no	phnC		phosphonate transport protein, ABC superfamily, atp_binding component	2a : Function from experimental evidences in other organisms	t : transporter	2 : Cytoplasmic	1.8.1 : Phosphorous metabolism ; 4.3.A.1.a : ATP binding component ; 7.1 : Cytoplasm ;						no	1840580, 1846145, 8388873		5.3 : Phosphorus compounds ; 7 : Transport and binding proteins ;
CmetNA4v1_40488	CDS		1053083	1054426	1344	automatic/finished	no			putative Major facilitator superfamily MFS_1	3 : Putative function from multiple computational evidences									no
CmetNA4v1_40489	CDS		1054426	1055682	1257	automatic/finished	no	bcr		Drug resistance transporter Bcr/CflA subfamily										no
CmetNA4v1_40490	CDS	-2	1055669	1057201	1533	automatic/finished	no	rng	cafA, adhR, yhdF	RNase G, ribonuclease G	2a : Function from experimental evidences in other organisms	e : enzyme	2 : Cytoplasmic	2.2.3 : RNA modification ; 2.2.4 : RNA degradation ; 5.1 : Cell division ; 7.1 : Cytoplasm ;	3.1.4.-	RXN0-6523				no	10329633, 16816186, 8300545		9.1 : Degradation of RNA ; 9.4 : RNA processing ; 10.3 : tRNA and rRNA base modification ; 15.1 : Cell division ;
CmetNA4v1_40491	CDS	-1	1057260	1057862	603	automatic/finished	no			conserved hypothetical protein, Maf-like domain	4 : Unknown function but conserved in other organisms	u : unknown	1 : Unknown							no			18 : Unknown function ;
CmetNA4v1_40492	CDS	-2	1057979	1058458	480	automatic/finished	no			conserved hypothetical protein	4 : Unknown function but conserved in other organisms	u : unknown	1 : Unknown							no			18 : Unknown function ;
CmetNA4v1_40493	CDS	-1	1058493	1059263	771	automatic/finished	no			conserved hypothetical protein	4 : Unknown function but conserved in other organisms	u : unknown	1 : Unknown							no			18 : Unknown function ;
CmetNA4v1_40494	CDS	-1	1059285	1059992	708	automatic/finished	no	nadD	ybeN	nicotinic acid mononucleotide adenylyltransferase, NAD(P)-requiring	2b : Function from indirect experimental evidences (e.g. phenotypes)	e : enzyme	1 : Unknown	1.5.3.7 : Nicotinamide adenine dinucleotide (NAD) ;	2.7.7.18	NICONUCADENYLYLTRAN-RXN	PYRIDNUCSAL-PWY$PYRIDNUCSYN-PWY			no			4.12 : Pyridine nucleotides ;
CmetNA4v1_40495	CDS	-3	1059997	1060908	912	automatic/finished	no	hemF	popB, sec	coproporphyrinogen III oxidase	2a : Function from experimental evidences in other organisms	e : enzyme	2 : Cytoplasmic	1.5.3.12 : Heme, porphyrin ; 7.1 : Cytoplasm ;	1.3.3.3	RXN0-1461	CHLOROPHYLL-SYN$HEME-BIOSYNTHESIS-II$PWY0-1415			no			4.3 : Heme, porphyrin, and cobalamin ;
CmetNA4v1_40496	CDS	-1	1061043	1062311	1269	automatic/finished	no	purD	adtha	phosphoribosylglycinamide synthetase (GAR synthetase)	2a : Function from experimental evidences in other organisms	e : enzyme	2 : Cytoplasmic	1.5.2.1 : Purine biosynthesis ; 7.1 : Cytoplasm ;	6.3.4.13	GLYRIBONUCSYN-RXN	PWY-6121$PWY-6122$PWY-6277			no			2.3 : Purine ribonucleotide biosynthesis ;
CmetNA4v1_40497	CDS	-1	1062396	1063121	726	automatic/finished	no			conserved hypothetical protein, DUF28	4 : Unknown function but conserved in other organisms	u : unknown	1 : Unknown							no			18 : Unknown function ;
CmetNA4v1_40498	CDS		1063377	1064912	1536	automatic/finished	no			putative enzyme, nucleoside triP hydrolase domain	3 : Putative function from multiple computational evidences	e : enzyme	1 : Unknown							no
CmetNA4v1_40499	CDS	-1	1065021	1065173	153	automatic/finished	no			conserved hypothetical protein	4 : Unknown function but conserved in other organisms	u : unknown	1 : Unknown							no			18 : Unknown function ;
CmetNA4v1_40500	CDS	-1	1065321	1065971	651	automatic/finished	no	upp	uraP	uracil phosphoribosyltransferase	2a : Function from experimental evidences in other organisms	e : enzyme	1 : Unknown	1.7.33 : Nucleotide and nucleoside conversions ;	2.4.2.9	URACIL-PRIBOSYLTRANS-RXN	P1-PWY$PWY0-163			no	12037295, 9268683		2.2 : Nucleotide and nucleoside interconversions ;
CmetNA4v1_40501	CDS		1066022	1066123	102	automatic/finished	no			protein of unknown function	5 : Unknown function	u : unknown	1 : Unknown							no
CmetNA4v1_40502	CDS	-3	1066063	1067052	990	automatic/finished	no			conserved exported protein of unknown function	4 : Unknown function but conserved in other organisms	u : unknown	1 : Unknown							no
CmetNA4v1_40503	CDS		1067074	1068183	1110	automatic/finished	no			conserved hypothetical protein, DUF6; putative TRANSMEMBRANE PROTEIN	4 : Unknown function but conserved in other organisms	u : unknown	11 : Membrane							no			18 : Unknown function ;
CmetNA4v1_40504	CDS		1068228	1069016	789	automatic/finished	no			putative DEHYDROGENASE/REDUCTASE OXIDOREDUCTASE PROTEIN	3 : Putative function from multiple computational evidences	e : enzyme	1 : Unknown		1.-.-.-					no
CmetNA4v1_40505	CDS		1069018	1069440	423	automatic/finished	no	mgsA	RS01414	METHYLGLYOXAL SYNTHASE PROTEIN	2b : Function from indirect experimental evidences (e.g. phenotypes)	e : enzyme	1 : Unknown	1 : Metabolism ;	4.2.3.3	METHGLYSYN-RXN				no			18.1 : Enzymes of unknown specificity ;
CmetNA4v1_40506	CDS	-3	1069465	1069758	294	automatic/finished	no			conserved hypothetical protein, DUF1232	4 : Unknown function but conserved in other organisms	u : unknown	1 : Unknown							no			18 : Unknown function ;
CmetNA4v1_40507	CDS	-3	1069891	1071033	1143	automatic/finished	no			putative outer membrane LIPOPROTEIN	3 : Putative function from multiple computational evidences	lp : lipoprotein	1 : Unknown							no
CmetNA4v1_40508	CDS	-3	1071043	1071117	75	automatic/finished	no			protein of unknown function	5 : Unknown function	u : unknown	1 : Unknown							no
CmetNA4v1_40509	CDS	-1	1071114	1072034	921	automatic/finished	no			putative ABC transport system, membrane component	3 : Putative function from multiple computational evidences	t : transporter	5 : Inner membrane protein	4.3.A.1.m : membrane component ;						no			7 : Transport and binding proteins ;
CmetNA4v1_40510	CDS	-1	1072053	1073147	1095	automatic/finished	no			putative ABC transport system, membrane component	3 : Putative function from multiple computational evidences	t : transporter	5 : Inner membrane protein	4.3.A.1.m : membrane component ;						no			7 : Transport and binding proteins ;
CmetNA4v1_40511	CDS	-3	1073140	1074708	1569	automatic/finished	no			putative monosaccharide transport system, ATP binding components	3 : Putative function from multiple computational evidences	t : transporter	2 : Cytoplasmic	4.3.A.1.a : ATP binding component ;						no			7 : Transport and binding proteins ;
CmetNA4v1_40512	CDS	-2	1075031	1075954	924	automatic/finished	no			conserved hypothetical protein, PIRIN-LIKE PROTEIN	4 : Unknown function but conserved in other organisms	u : unknown	1 : Unknown							no	16980458		18 : Unknown function ;
CmetNA4v1_40513	CDS		1076599	1077315	717	automatic/finished	no			putative glycine betaine/carnitine/choline transport system inner membrane component	3 : Putative function from multiple computational evidences	t : transporter	5 : Inner membrane protein	4.3.A.1.m : membrane component ;						no			7 : Transport and binding proteins ;
CmetNA4v1_40514	CDS		1077326	1078276	951	automatic/finished	no			putative glycine betaine/carnitine/choline transport system membrane associated component	3 : Putative function from multiple computational evidences	t : transporter	6 : Inner membrane-associated	4.3.A.1.m : membrane component ;						no			7 : Transport and binding proteins ;
CmetNA4v1_40515	CDS		1078287	1078937	651	automatic/finished	no			putative glycine betaine/carnitine/choline transport system inner membrane component	3 : Putative function from multiple computational evidences	t : transporter	5 : Inner membrane protein	4.3.A.1.m : membrane component ;						no			7 : Transport and binding proteins ;
CmetNA4v1_40516	CDS		1078934	1080130	1197	automatic/finished	no			putative glycine betaine/carnitine/choline transporter, ATP-binding component	3 : Putative function from multiple computational evidences	t : transporter	2 : Cytoplasmic	4.3.A.1.a : ATP binding component ;						no			7 : Transport and binding proteins ;
CmetNA4v1_40517	CDS	-3	1080352	1080798	447	automatic/finished	no			conserved membrane protein of unknown function	4 : Unknown function but conserved in other organisms	u : unknown	1 : Unknown							no
CmetNA4v1_40518	CDS	-2	1080953	1081708	756	automatic/finished	no			conserved hypothetical protein; putative STOMATIN-LIKE TRANSMEMBRANE PROTEIN	4 : Unknown function but conserved in other organisms	u : unknown	11 : Membrane							no			18 : Unknown function ;
CmetNA4v1_40519	CDS	-2	1081745	1083157	1413	automatic/finished	no			putative membrane bound peptidase; NefD homolog	3 : Putative function from multiple computational evidences	e : enzyme	5 : Inner membrane protein							no
CmetNA4v1_40520	CDS		1083355	1084599	1245	automatic/finished	no			conserved hypothetical protein, DUF1228; putative membrane protein	4 : Unknown function but conserved in other organisms	u : unknown	5 : Inner membrane protein							no			18 : Unknown function ;
CmetNA4v1_40521	CDS		1084686	1085459	774	automatic/finished	no			putative ALDOLASE, class II family, Adducin subfamily	3 : Putative function from multiple computational evidences	e : enzyme	1 : Unknown		4.1.2.-					no
CmetNA4v1_40522	CDS		1085479	1085667	189	automatic/finished	no			putative TAUTOMERASE (4-OXALOCROTONATE TAUTOMERASE)	3 : Putative function from multiple computational evidences	e : enzyme	1 : Unknown	1.1.1 : Carbohydrates/Carbon compounds ;	5.3.2.-					no			6 : Energy metabolism ;
CmetNA4v1_40523	CDS		1085687	1086739	1053	automatic/finished	no	ltaA	RS05014	LOW SPECIFICITY L-THREONINE ALDOLASE	2a : Function from experimental evidences in other organisms	e : enzyme	2 : Cytoplasmic	1.5.1.10 : Glycine ;	4.1.2.5	PHENYLSERINE-ALDOLASE-RXN$LTAA-RXN$THREONINE-ALDOLASE-RXN	GLYSYN-THR-PWY$PWY-5436			no			1.5 : Serine family ;
CmetNA4v1_40524	CDS		1086807	1087403	597	automatic/finished	no			putative hydrolase, NUDIX domain	3 : Putative function from multiple computational evidences	e : enzyme	1 : Unknown							no
CmetNA4v1_40525	CDS		1087416	1087643	228	automatic/finished	no			putative regulator, SirA-like domain	3 : Putative function from multiple computational evidences	r : regulator	1 : Unknown	3 : Regulation ;						no			12 : Regulatory functions ;
CmetNA4v1_40526	CDS	-2	1087715	1088062	348	automatic/finished	no			putative FKBP-TYPE PEPTIDYL-PROLYL CIS-TRANS ISOMERASE (PPIASE)	3 : Putative function from multiple computational evidences	e : enzyme	1 : Unknown	2.3.4 : Chaperoning, folding ;	5.2.1.8	PEPTIDYLPROLYL-ISOMERASE-RXN				no	17249419		11.3 : Protein folding and stabilization ;
CmetNA4v1_40527	CDS	-2	1088093	1088641	549	automatic/finished	no			conserved hypothetical protein yaeQ homolog	4 : Unknown function but conserved in other organisms	u : unknown	1 : Unknown							no			18 : Unknown function ;
CmetNA4v1_40528	CDS	-2	1088774	1089082	309	automatic/finished	no			putative membrane lipoprotein	3 : Putative function from multiple computational evidences	lp : lipoprotein	11 : Membrane							no
CmetNA4v1_40529	CDS	-1	1089210	1089803	594	automatic/finished	no			conserved hypothetical protein; putative base-induced periplasmic YceI-like protein	4 : Unknown function but conserved in other organisms	u : unknown	9 : Periplasmic							no	12107143		18 : Unknown function ;
CmetNA4v1_40530	CDS	-1	1089843	1090226	384	automatic/finished	no			conserved hypothetical protein; putative TRANSMEMBRANE PROTEIN	4 : Unknown function but conserved in other organisms	u : unknown	11 : Membrane							no			18 : Unknown function ;
CmetNA4v1_40531	CDS	-1	1090335	1090565	231	automatic/finished	no			conserved hypothetical protein, COG2501	4 : Unknown function but conserved in other organisms	u : unknown	1 : Unknown							no			18 : Unknown function ;
CmetNA4v1_40532	CDS	-2	1090568	1092316	1749	automatic/finished	no	glnS		glutamine tRNA synthetase	2a : Function from experimental evidences in other organisms	e : enzyme	2 : Cytoplasmic	2.3.1 : Amino acid-activation ; 7.1 : Cytoplasm ;	6.1.1.18	GLUTAMINE--TRNA-LIGASE-RXN	TRNA-CHARGING-PWY			no			10.1 : tRNA aminoacylation ;
CmetNA4v1_40533	CDS		1092596	1094047	1452	automatic/finished	no			putative formyl-coenzyme A transferase, CaiB/BaiF family	3 : Putative function from multiple computational evidences	e : enzyme	1 : Unknown		2.8.3.16	RXN0-1382	PWY-6695			no
CmetNA4v1_40534	CDS	-3	1094044	1094661	618	automatic/finished	no			putative 1 Pyridoxamine 5'-phosphate oxidase-related, FMN-binding protein	3 : Putative function from multiple computational evidences	e : enzyme	1 : Unknown	1.4 : Energy production/transport ;						no			6.5 : Electron transport ;
CmetNA4v1_40535	CDS	-2	1094675	1095535	861	automatic/finished	no			putative isomerase, Phenazine biosynthesis PhzC/PhzF domain	3 : Putative function from multiple computational evidences	e : enzyme	1 : Unknown	1 : Metabolism ;	5.-.-.-					no	15545603, 17085692		18.1 : Enzymes of unknown specificity ;
CmetNA4v1_40536	CDS	-2	1095860	1097485	1626	automatic/finished	no			GAMMA-GLUTAMYLTRANSPEPTIDASE PROTEIN	2b : Function from indirect experimental evidences (e.g. phenotypes)	e : enzyme	1 : Unknown	1.5.1 : Amino acids ;	2.3.2.2	RXN-6641$RXN-9157$RXN66-336$GAMMA-GLUTAMYLTRANSFERASE-RXN$RXN-6601	PWY-4041			no			1 : Amino acid biosynthesis ;
CmetNA4v1_40537	CDS	-2	1097564	1098541	978	automatic/finished	no			conserved hypothetical protein, UPF0065	4 : Unknown function but conserved in other organisms	u : unknown	9 : Periplasmic							no	12562821		18 : Unknown function ;
CmetNA4v1_40538	CDS		1098711	1099595	885	automatic/finished	no			putative transcriptional Regulator, LysR family	3 : Putative function from multiple computational evidences	r : regulator	2 : Cytoplasmic	3.1.2 : Transcriptional level ;						no			12.1 : DNA interactions ;
CmetNA4v1_40539	CDS	-2	1099703	1101205	1503	automatic/finished	no			conserved hypothetical protein; putative TRANSMEMBRANE PROTEIN	4 : Unknown function but conserved in other organisms	u : unknown	5 : Inner membrane protein							no			18 : Unknown function ;
CmetNA4v1_40540	CDS	-1	1101219	1101680	462	automatic/finished	no			conserved hypothetical protein, DUF1468; putative TRANSMEMBRANE PROTEIN	4 : Unknown function but conserved in other organisms	u : unknown	5 : Inner membrane protein							no			18 : Unknown function ;
CmetNA4v1_40541	CDS		1102055	1103872	1818	automatic/finished	no	cvrA	ycgO	Cell volume regulation protein A homolog, putative Na:H transport protein (CPA1 family)	2b : Function from indirect experimental evidences (e.g. phenotypes)	t : transporter	5 : Inner membrane protein	4.2.A.36 : The Monovalent Cation:Proton Antiporter-1 (CPA1) Family ; 5.5.1 : Osmotic pressure ; 6.1 : Membrane ; 7.3 : Inner membrane ;						no	11700351		7 : Transport and binding proteins ; 15.10 : Adaptations to atypical conditions ;
CmetNA4v1_40542	CDS	-1	1103844	1104851	1008	automatic/finished	no			conserved hypothetical protein, UPF0065	4 : Unknown function but conserved in other organisms	u : unknown	9 : Periplasmic							no	12562821		18 : Unknown function ;
CmetNA4v1_40543	CDS	-3	1104949	1105404	456	automatic/finished	no			conserved hypothetical protein, COG3556; putative TRANSMEMBRANE PROTEIN	4 : Unknown function but conserved in other organisms	u : unknown	5 : Inner membrane protein							no			18 : Unknown function ;
CmetNA4v1_40544	CDS	-1	1105506	1106762	1257	automatic/finished	no			putative Formyl-CoA transferase, CaiB/BaiF family	3 : Putative function from multiple computational evidences	e : enzyme	1 : Unknown		2.8.3.16	RXN0-1382	PWY-6695			no
CmetNA4v1_40545	CDS		1106976	1109600	2625	automatic/finished	no	alaS	act, ala-act, lovB	alanyl-tRNA synthetase	2a : Function from experimental evidences in other organisms	e : enzyme	2 : Cytoplasmic	2.3.1 : Amino acid-activation ; 7.1 : Cytoplasm ;	6.1.1.7	ALANINE--TRNA-LIGASE-RXN	TRNA-CHARGING-PWY			no			10.1 : tRNA aminoacylation ;
CmetNA4v1_40546	CDS	-2	1109705	1111282	1578	automatic/finished	no	aldH		NADP-dependent aldehyde dehydrogenase	2a : Function from experimental evidences in other organisms	e : enzyme	2 : Cytoplasmic	1.7 : Central intermediary metabolism ;	1.2.1.4	RXN-12165$ALDEHYDE-DEHYDROGENASE-NADP+RXN$GLYCERALDEHYDE-DEHYDRO-RXN	PWY-6713			no	10903148		5 : Central intermediary metabolism ;
CmetNA4v1_40547	CDS	-2	1111448	1112197	750	automatic/finished	no			putative TRANSCRIPTIONAL REGULATOR, GntR family	3 : Putative function from multiple computational evidences	r : regulator	2 : Cytoplasmic	3.1.2 : Transcriptional level ;						no			12.1 : DNA interactions ;
CmetNA4v1_40548	CDS	-3	1112266	1112361	96	automatic/finished	no			protein of unknown function	5 : Unknown function	u : unknown	1 : Unknown							no
CmetNA4v1_40549	CDS		1112360	1113715	1356	automatic/finished	no	gudD	ygcX	(D)-glucarate dehydratase 1	2a : Function from experimental evidences in other organisms	e : enzyme	1 : Unknown	1.1.1.6 : D-glucarate catabolism ;	4.2.1.40	RXN0-5285$GLUCARDEHYDRA-RXN	GLUCARDEG-PWY$PWY-6499			no	9772161		6.11 : Sugars ;
CmetNA4v1_40550	CDS		1113810	1114865	1056	automatic/finished	no			conserved hypothetical protein; putative exported protein, UPF0065	4 : Unknown function but conserved in other organisms	u : unknown	9 : Periplasmic							no	12562821		18 : Unknown function ;
CmetNA4v1_40551	CDS		1115076	1115669	594	automatic/finished	no			conserved exported protein of unknown function	4 : Unknown function but conserved in other organisms	u : unknown	1 : Unknown							no
CmetNA4v1_40552	CDS		1116105	1118399	2295	automatic/finished	no			Hydroxamate-type ferrisiderophore receptor										no
CmetNA4v1_40553	CDS		1118479	1119165	687	automatic/finished	no	ybiX		conserved hypothetical protein with PKHD hydroxylase domain	4 : Unknown function but conserved in other organisms	u : unknown	1 : Unknown							no			18 : Unknown function ;
CmetNA4v1_40554	CDS		1119171	1120256	1086	automatic/finished	no	haox		Hydroxyacid oxidase					1.1.3.15	S-2-HYDROXY-ACID-OXIDASE-RXN$RXN0-5364$RXN-969				no
CmetNA4v1_40555	CDS	-2	1120259	1121029	771	automatic/finished	no			IclR-family transcriptional regulator										no
CmetNA4v1_40556	CDS		1121189	1122007	819	automatic/finished	no			putative enoyl-CoA hydratase/isomerase	3 : Putative function from multiple computational evidences				4.2.1.17	TIGLYLCOA-HYDROXY-RXN$RXN0-6513$ENOYL-COA-HYDRAT-RXN$RXN-11244$RXN-10705$RXN-10704$RXN-10697$RXN-7838$METHYLACYLYLCOA-HYDROXY-RXN$RXN-11667$RXN0-2043	ILEUDEG-PWY$PWY0-321$FAO-PWY$VALDEG-PWY$PWY-5177$CENTFERM-PWY			no
CmetNA4v1_40557	CDS		1122009	1124111	2103	automatic/finished	no			putative acetyl-CoA synthetase (CoA-binding domain)	3 : Putative function from multiple computational evidences				6.2.1.13	ACETATE--COA-LIGASE-ADP-FORMING-RXN$PROPANOATECOA-LIGASE-RXN	PWY-5535$PWY-5483			no
CmetNA4v1_40558	CDS		1124171	1125142	972	automatic/finished	no			conserved exported protein of unknown function	4 : Unknown function but conserved in other organisms	u : unknown	1 : Unknown							no
CmetNA4v1_40559	CDS		1125146	1126354	1209	automatic/finished	no			putative Acyl-CoA dehydrogenase	3 : Putative function from multiple computational evidences				1.3.99.2	ACYLCOADEHYDROG-RXN$RXN-11734$BUTYRYL-COA-DEHYDROGENASE-RXN	FAO-PWY$CENTFERM-PWY			no
CmetNA4v1_40560	CDS		1126354	1127550	1197	automatic/finished	no			Acyl-CoA dehydrogenase					1.3.99.3	LONG-CHAIN-ACYL-COA-DEHYDROGENASE-RXN				no
CmetNA4v1_tRNA59	tRNA	-1	1127627	1127716	90	automatic/finished	no			Ser tRNA												tRNA Ser anticodon TGA, Cove score 74.98
CmetNA4v1_40561	CDS		1127956	1128474	519	automatic/finished	no			putative OUTER MEMBRANE LIPOPROTEIN TRANSMEMBRANE	3 : Putative function from multiple computational evidences	m : membrane component	8 : Outer membrane-associated							no
CmetNA4v1_40562	CDS	-3	1128583	1129842	1260	automatic/finished	no	yggW		Oxygen-independent coproporphyrinogen III oxidase(Coproporphyrinogenase)(Coprogen oxidase)	2b : Function from indirect experimental evidences (e.g. phenotypes)	e : enzyme	1 : Unknown	1 : Metabolism ;	1.3.99.22	HEMN-RXN	HEMESYN2-PWY$PWY0-1415			no			18.1 : Enzymes of unknown specificity ;
CmetNA4v1_40563	CDS	-1	1129839	1130459	621	automatic/finished	no	rdgB	yggV	Nucleoside-triphosphate diphosphatase	2b : Function from indirect experimental evidences (e.g. phenotypes)	e : enzyme	2 : Cytoplasmic	2.1.4 : DNA repair ;	3.6.1.-	3.6.1.19-RXN				no			8.1 : DNA replication, recombination, and repair ;
CmetNA4v1_40564	CDS	-1	1130472	1131188	717	automatic/finished	no	rph		RNase PH	2b : Function from indirect experimental evidences (e.g. phenotypes)	e : enzyme	1 : Unknown	1.2.1 : RNA ; 2.2.4 : RNA degradation ; 2.2.5 : tRNA ;	2.7.7.56	TRNA-NUCLEOTIDYLTRANSFERASE-RXN$RXN0-6482$RXN0-6481	PWY0-1479			no			9.1 : Degradation of RNA ; 10 : Protein synthesis ;
CmetNA4v1_40565	CDS	-2	1131269	1132183	915	automatic/finished	no			putative protein phophatase	3 : Putative function from multiple computational evidences	e : enzyme	1 : Unknown	1 : Metabolism ;						no			18.1 : Enzymes of unknown specificity ;
CmetNA4v1_40566	CDS	-3	1132225	1133286	1062	automatic/finished	no			putative serine/threonine protein kinase	3 : Putative function from multiple computational evidences	e : enzyme	1 : Unknown		2.7.1.-	PROTEIN-KINASE-RXN				no
CmetNA4v1_40567	CDS	-1	1133283	1133519	237	automatic/finished	no			conserved protein of unknown function	4 : Unknown function but conserved in other organisms	u : unknown	1 : Unknown							no
CmetNA4v1_40568	CDS		1133506	1134441	936	automatic/finished	no			conserved hypothetical protein; Uncharacterized stress-induced protein	4 : Unknown function but conserved in other organisms	u : unknown	1 : Unknown	5.5 : Adaptation to stress ;						no			15.10 : Adaptations to atypical conditions ;
CmetNA4v1_40569	CDS		1134446	1135096	651	automatic/finished	no	gmk	spoR	guanylate kinase	2b : Function from indirect experimental evidences (e.g. phenotypes)	e : enzyme	2 : Cytoplasmic	1.5.2.3 : Purine ribonucleotide biosynthesis ; 1.7.33 : Nucleotide and nucleoside conversions ; 7.1 : Cytoplasm ;	2.7.4.8	GUANYL-KIN-RXN$GMKALT-RXN	PWY-6125$P1-PWY			no			2.2 : Nucleotide and nucleoside interconversions ; 2.3 : Purine ribonucleotide biosynthesis ;
CmetNA4v1_40570	CDS	-2	1135160	1135852	693	automatic/finished	no			conserved exported protein of unknown function	4 : Unknown function but conserved in other organisms	u : unknown	1 : Unknown							no
CmetNA4v1_40571	CDS		1135470	1138094	2625	automatic/finished	no	spoT		bifunctional: (p)ppGpp synthetase II; guanosine-3',5'-bis pyrophosphate 3'-pyrophosphohydrolase; putative precursor	2b : Function from indirect experimental evidences (e.g. phenotypes)	e : enzyme	2 : Cytoplasmic	1.7.33 : Nucleotide and nucleoside conversions ; 3.1.3.4 : Proteases, cleavage of compounds ; 5.5.3 : Starvation response ; 7.1 : Cytoplasm ;	2.7.6.5, 3.1.7.2	RXN0-6427$PPGPPSYN-RXN$GDPPYPHOSKIN-RXN	PPGPPMET-PWY			no			2.2 : Nucleotide and nucleoside interconversions ; 12.3 : Protein interactions ; 15.10 : Adaptations to atypical conditions ;
CmetNA4v1_40572	CDS	-2	1138091	1138651	561	automatic/finished	no	greB	RS01451	TRANSCRIPTION ELONGATION FACTOR (TRANSCRIPT CLEAVAGE FACTOR)	2a : Function from experimental evidences in other organisms	f : factor	2 : Cytoplasmic	2.2.2 : Transcription related ; 3.1.2 : Transcriptional level ;						no	14633991		9 : Transcription ; 12.1 : DNA interactions ;
CmetNA4v1_40573	CDS	-1	1138707	1138922	216	automatic/finished	no			protein of unknown function	5 : Unknown function	u : unknown	1 : Unknown							no
CmetNA4v1_tRNA3	tRNA		1138776	1138852	77	automatic/finished	no			Arg tRNA												tRNA Arg anticodon ACG, Cove score 87.10
CmetNA4v1_40574	CDS		1138880	1139116	237	automatic/finished	no			protein of unknown function	5 : Unknown function	u : unknown	1 : Unknown							no
CmetNA4v1_40575	CDS		1139050	1139316	267	automatic/finished	no			conserved hypothetical protein	4 : Unknown function but conserved in other organisms	u : unknown	1 : Unknown							no			18 : Unknown function ;
CmetNA4v1_40576	CDS		1139480	1139719	240	automatic/finished	no			Predicted protein (fragment)										no
CmetNA4v1_40577	CDS	-1	1139763	1139900	138	automatic/finished	no			protein of unknown function	5 : Unknown function	u : unknown	1 : Unknown							no
CmetNA4v1_tRNA4	tRNA		1139827	1139903	77	automatic/finished	no			Met tRNA												tRNA Met anticodon CAT, Cove score 87.64
CmetNA4v1_40578	CDS	-3	1139923	1140006	84	automatic/finished	no			protein of unknown function	5 : Unknown function	u : unknown	1 : Unknown							no
CmetNA4v1_40579	CDS	-3	1140082	1140342	261	automatic/finished	no			conserved hypothetical protein	4 : Unknown function but conserved in other organisms	u : unknown	1 : Unknown							no			18 : Unknown function ;
CmetNA4v1_40580	CDS	-1	1140393	1140683	291	automatic/finished	no			conserved hypothetical protein	4 : Unknown function but conserved in other organisms	u : unknown	1 : Unknown							no			18 : Unknown function ;
CmetNA4v1_40581	CDS	-3	1140811	1141155	345	automatic/finished	no			conserved protein of unknown function	4 : Unknown function but conserved in other organisms	u : unknown	1 : Unknown							no
CmetNA4v1_40582	CDS		1140928	1142340	1413	automatic/finished	no			conserved protein of unknown function	4 : Unknown function but conserved in other organisms	u : unknown	1 : Unknown							no
CmetNA4v1_40583	CDS		1142367	1142678	312	automatic/finished	no			conserved hypothetical protein	4 : Unknown function but conserved in other organisms	u : unknown	1 : Unknown							no			18 : Unknown function ;
CmetNA4v1_40584	CDS		1142797	1143699	903	automatic/finished	no			putative hydroxylase; similar to clavaminate synthase	3 : Putative function from multiple computational evidences	e : enzyme	11 : Membrane	1 : Metabolism ;						no			18.1 : Enzymes of unknown specificity ;
CmetNA4v1_40585	CDS	-1	1143759	1145237	1479	automatic/finished	no			putative diguanylate cyclase with PAS sensor domain	3 : Putative function from multiple computational evidences	e : enzyme	1 : Unknown	1.7.33 : Nucleotide and nucleoside conversions ; 3 : Regulation ;						no			2.2 : Nucleotide and nucleoside interconversions ; 12 : Regulatory functions ;
CmetNA4v1_40586	CDS	-1	1145352	1146839	1488	automatic/finished	no			putative fused transcriptional regulator aminotransferase, GntR MocR domains	3 : Putative function from multiple computational evidences	r : regulator	2 : Cytoplasmic	3.1.2 : Transcriptional level ; 1.5.1 : Amino acids ; 4.S.12 : amino acid ;						no			1 : Amino acid biosynthesis ; 7.1 : Amino acids, peptides and amines ; 12.1 : DNA interactions ;
CmetNA4v1_40587	CDS		1147018	1147437	420	automatic/finished	no			protein of unknown function	5 : Unknown function	u : unknown	1 : Unknown							no
CmetNA4v1_40588	CDS		1147421	1149040	1620	automatic/finished	no			putative FAD dependent oxidoreductase	3 : Putative function from multiple computational evidences	e : enzyme	1 : Unknown	1 : Metabolism ;						no			18.1 : Enzymes of unknown specificity ;
CmetNA4v1_40589	CDS		1149037	1149630	594	automatic/finished	no			conserved hypothetical protein, DUF1415	4 : Unknown function but conserved in other organisms	u : unknown	1 : Unknown							no			18 : Unknown function ;
CmetNA4v1_40590	CDS	-3	1149679	1150509	831	automatic/finished	no			conserved hypothetical protein; putative S-adenosyl-L-methionine-dependent methyltransferase	4 : Unknown function but conserved in other organisms	u : unknown	1 : Unknown							no			18 : Unknown function ;
CmetNA4v1_40591	CDS		1150726	1152351	1626	automatic/finished	no			conserved hypothetical protein, DUF342	4 : Unknown function but conserved in other organisms	u : unknown	1 : Unknown							no			18 : Unknown function ;
CmetNA4v1_40592	CDS		1152590	1153003	414	automatic/finished	no			putative transcriptional regulator, LuxR family (Domain CheY-like)	3 : Putative function from multiple computational evidences									no
CmetNA4v1_40593	CDS		1153393	1153866	474	automatic/finished	no			conserved protein of unknown function	4 : Unknown function but conserved in other organisms	u : unknown	1 : Unknown							no
CmetNA4v1_tRNA58	tRNA	-1	1153413	1153488	76	automatic/finished	no			Thr tRNA												tRNA Thr anticodon CGT, Cove score 87.03
CmetNA4v1_40594	CDS	-1	1153839	1154855	1017	automatic/finished	no	fbp	fdp	fructose-bisphosphatase	2a : Function from experimental evidences in other organisms	e : enzyme	2 : Cytoplasmic	1.7.8 : Gluconeogenesis ; 7.1 : Cytoplasm ;	3.1.3.11	F16BDEPHOS-RXN	GLUCONEO-PWY$GLYCOLYSIS-E-D$GLYCOLYSIS			no			6.8 : Glycolysis/gluconeogenesis ;
CmetNA4v1_40595	CDS	-1	1154922	1157615	2694	automatic/finished	no	pepN		aminopeptidase N, cysteinylglycinase (putative precursor)	2a : Function from experimental evidences in other organisms	e : enzyme	1 : Unknown	1.2.3 : Proteins/peptides/glycopeptides ;	3.4.11.2	RXN0-5195$3.4.11.2-RXN				no	11157967		11.4 : Degradation of proteins, peptides, and glycopeptides ;
CmetNA4v1_40596	CDS	-3	1157740	1157811	72	automatic/finished	no			conserved protein of unknown function	4 : Unknown function but conserved in other organisms	u : unknown	1 : Unknown							no
CmetNA4v1_40597	CDS		1157802	1158473	672	automatic/finished	no			conserved hypothetical protein; putative transmembrane protein	4 : Unknown function but conserved in other organisms	u : unknown	1 : Unknown							no			18 : Unknown function ;
CmetNA4v1_40598	CDS		1158661	1160982	2322	automatic/finished	no	maeB	ypfF	NAD(P)-dependent malic enzyme;bifunctional: malic oxidoreductase (N-terminal); phosphotransacetylase (C-terminal)	2b : Function from indirect experimental evidences (e.g. phenotypes)	e : enzyme	1 : Unknown	1.7.8 : Gluconeogenesis ;		MALIC-NADP-RXN	GLUCONEO-PWY			no			6.8 : Glycolysis/gluconeogenesis ;
CmetNA4v1_40599	CDS	-1	1161135	1161380	246	automatic/finished	no			conserved hypothetical protein	4 : Unknown function but conserved in other organisms	u : unknown	1 : Unknown							no			18 : Unknown function ;
CmetNA4v1_40600	CDS	-3	1161622	1162707	1086	automatic/finished	no			putative outer membrane porin	3 : Putative function from multiple computational evidences	t : transporter	7 : Outer membrane protein	4.1.B : Beta barrel porins (The Outer Membrane Porin (OMP) Functional Superfamily) ;						no			7.6 : Porins ;
CmetNA4v1_40601	CDS	-2	1162904	1163425	522	automatic/finished	no			conserved hypothetical protein, COG3195	4 : Unknown function but conserved in other organisms	u : unknown	1 : Unknown							no			18 : Unknown function ;
CmetNA4v1_40602	CDS	-3	1163422	1164366	945	automatic/finished	no			putative Polysaccharide deacetylase; xylanase/chitin deacetylase	3 : Putative function from multiple computational evidences	e : enzyme	1 : Unknown	1.2.4 : Polysaccharides ;						no			6.14 : Biosynthesis and degradation of polysaccharides ;
CmetNA4v1_40603	CDS	-2	1164548	1165954	1407	automatic/finished	no			putative Xanthine/uracil permease (NCS2 family)	3 : Putative function from multiple computational evidences	t : transporter	5 : Inner membrane protein	4.2.A.40 : The Nucleobase:Cation Symporter-2 (NCS2) Family ; 6.1 : Membrane ; 7.3 : Inner membrane ;						no			7 : Transport and binding proteins ;
CmetNA4v1_40604	CDS	-1	1166166	1166909	744	automatic/finished	no			putative TRANSCRIPTIONal REGULATOR, GntR family	3 : Putative function from multiple computational evidences	r : regulator	2 : Cytoplasmic	3.1.2 : Transcriptional level ;						no			12.1 : DNA interactions ;
CmetNA4v1_40605	CDS		1167253	1167606	354	automatic/finished	no	pucM		5-hydroxyisourate hydrolase (HIUHase)	2a : Function from experimental evidences in other organisms	e : enzyme	1 : Unknown	1.8.3 : Nitrogen metabolism ;	3.5.2.17	3.5.2.17-RXN	PWY-5691			no	16782815		5.7 : Nitrogen metabolism ;
CmetNA4v1_40606	CDS		1167638	1168846	1209	automatic/finished	no			conserved hypothetical protein, DUF989; putative TRANSMEMBRANE PROTEIN	4 : Unknown function but conserved in other organisms	u : unknown	11 : Membrane							no			18 : Unknown function ;
CmetNA4v1_40607	CDS	-1	1169013	1169588	576	automatic/finished	no			conserved hypothetical protein, COG2119; putative TRANSMEMBRANE PROTEIN	4 : Unknown function but conserved in other organisms	u : unknown	5 : Inner membrane protein							no			18 : Unknown function ;
CmetNA4v1_miscRNA7	misc_RNA	-1	1169654	1169839	186	automatic/finished	no			yybP-ykoY												Predicted by Rfam, accession=RF00080, e-value=1.2e-08.
CmetNA4v1_40608	CDS	-1	1169931	1171112	1182	automatic/finished	no			putative Fatty acid desaturase, family 2	3 : Putative function from multiple computational evidences	e : enzyme	5 : Inner membrane protein	1.6.4 : Enterobacterial common antigen (surface glycolipid) ; 5.5.2 : Temperature extremes ;	1.14.99.-	RXN-11680$RXN-12776$1.14.19.1-RXN				no			14.3 : Biosynthesis and degradation of surface polysaccharides and lipopolysaccharides ; 15.10 : Adaptations to atypical conditions ;
CmetNA4v1_40609	CDS	-1	1171323	1172663	1341	automatic/finished	no	guaD	ygfP	guanine deaminase	2a : Function from experimental evidences in other organisms	e : enzyme	1 : Unknown	1.7.1 : Unassigned reversible reactions ; 1.7.33 : Nucleotide and nucleoside conversions ;	3.5.4.3	GUANINE-DEAMINASE-RXN	PWY-6608			no			2.2 : Nucleotide and nucleoside interconversions ; 5 : Central intermediary metabolism ;
CmetNA4v1_40610	CDS	-2	1172741	1173805	1065	automatic/finished	no	add	RS03663	ADENOSINE DEAMINASE	2a : Function from experimental evidences in other organisms	e : enzyme	2 : Cytoplasmic	1.7.33 : Nucleotide and nucleoside conversions ;	3.5.4.4	ADENODEAMIN-RXN$ADDALT-RXN	SALVADEHYPOX-PWY$PWY0-1297			no			2.2 : Nucleotide and nucleoside interconversions ;
CmetNA4v1_40611	CDS	-3	1173850	1174845	996	automatic/finished	no	xdhC	RS03662	XANTHINE DEHYDROGENASE accessory component	2b : Function from indirect experimental evidences (e.g. phenotypes)	f : factor	2 : Cytoplasmic	1.5.3.4 : Molybdenum (molybdopterin) ;	1.17.3.2	RXN-12615$XANTHINE-OXIDASE-RXN				no	10217763		4.6 : Molybdopterin ;
CmetNA4v1_40612	CDS	-2	1174865	1177216	2352	automatic/finished	no	xdhB	RS03661	XANTHINE DEHYDROGENASE (SUBUNIT B) OXIDOREDUCTASE PROTEIN	2a : Function from experimental evidences in other organisms	e : enzyme	2 : Cytoplasmic	1 : Metabolism ;	1.17.3.2	RXN-12615$XANTHINE-OXIDASE-RXN				no	7876088		18.1 : Enzymes of unknown specificity ;
CmetNA4v1_40613	CDS	-3	1177228	1178724	1497	automatic/finished	no	xdhA	RS03660	XANTHINE DEHYDROGENASE (SUBUNIT A) (Purine hydroxylase I)	2a : Function from experimental evidences in other organisms	e : enzyme	2 : Cytoplasmic	1 : Metabolism ;	1.17.3.2	RXN-12615$XANTHINE-OXIDASE-RXN				no	7876088		18.1 : Enzymes of unknown specificity ;
CmetNA4v1_40614	CDS		1179002	1179952	951	automatic/finished	no			putative TRANSCRIPTIONal REGULATOR, LysR family	3 : Putative function from multiple computational evidences	r : regulator	2 : Cytoplasmic	3.1.2 : Transcriptional level ;						no			12.1 : DNA interactions ;
CmetNA4v1_40615	CDS	-1	1180017	1180871	855	automatic/finished	no			putative ABC-type tungstate transport system, periplasmic binding component	3 : Putative function from multiple computational evidences	t : transporter	9 : Periplasmic	4.3.A.1.p : periplasmic binding component ;						no			7 : Transport and binding proteins ;
CmetNA4v1_40616	CDS		1181014	1182111	1098	automatic/finished	no			putative transcriptional regulator, LysR family	3 : Putative function from multiple computational evidences	r : regulator	2 : Cytoplasmic	3.1.2 : Transcriptional level ;						no			12.1 : DNA interactions ;
CmetNA4v1_40617	CDS		1182208	1182804	597	automatic/finished	no			conserved hypothetical protein, putative TRANSMEMBRANE PROTEIN	4 : Unknown function but conserved in other organisms	u : unknown	5 : Inner membrane protein							no			18 : Unknown function ;
CmetNA4v1_40618	CDS		1182862	1185417	2556	automatic/finished	no			putative ABC-type transporter involved in lysophospholipase L1 biosynthesis, permease component	3 : Putative function from multiple computational evidences	t : transporter	5 : Inner membrane protein	4.3.A.1.m : membrane component ;						no			7 : Transport and binding proteins ;
CmetNA4v1_40619	CDS		1185433	1185876	444	automatic/finished	no			putative oxygen-binding heme protein	3 : Putative function from multiple computational evidences	c : carrier	1 : Unknown	1.5.3.12 : Heme, porphyrin ;						no	15590662		4.3 : Heme, porphyrin, and cobalamin ;
CmetNA4v1_40620	CDS		1185863	1186465	603	automatic/finished	no			conserved hypothetical protein, DUF924	4 : Unknown function but conserved in other organisms	u : unknown	1 : Unknown							no			18 : Unknown function ;
CmetNA4v1_40621	CDS		1186567	1187277	711	automatic/finished	no			putative TRANSCRIPTIONal REGULATOR, TetR family	3 : Putative function from multiple computational evidences	r : regulator	2 : Cytoplasmic	3.1.2 : Transcriptional level ;						no			12.1 : DNA interactions ;
CmetNA4v1_40622	CDS		1187358	1187858	501	automatic/finished	no			conserved hypothetical protein	4 : Unknown function but conserved in other organisms	u : unknown	1 : Unknown							no			18 : Unknown function ;
CmetNA4v1_40623	CDS	-2	1187918	1188415	498	automatic/finished	no	dgkA	RS03650	DIACYLGLYCEROL KINASE TRANSMEMBRANE PROTEIN	2a : Function from experimental evidences in other organisms	e : enzyme	5 : Inner membrane protein	1.6.1 : Phospholipid ; 1.5.4 : Fatty acid and phosphatidic acid ;	2.7.1.107	DIACYLGLYKIN-RXN				no			3.1 : Biosynthesis ;
CmetNA4v1_40624	CDS	-1	1188342	1189460	1119	automatic/finished	no			putative glycosyl transferase	3 : Putative function from multiple computational evidences	e : enzyme	1 : Unknown	1 : Metabolism ;						no			18.1 : Enzymes of unknown specificity ;
CmetNA4v1_40625	CDS	-1	1189560	1190642	1083	automatic/finished	no			conserved hypothetical protein, COG2908; putative exported protein	4 : Unknown function but conserved in other organisms	u : unknown	1 : Unknown							no			18 : Unknown function ;
CmetNA4v1_40626	CDS	-1	1190670	1191704	1035	automatic/finished	no			putative LIPASE/acetyltransferase TRANSMEMBRANE PROTEIN	3 : Putative function from multiple computational evidences	e : enzyme	11 : Membrane		3.1.-.-					no
CmetNA4v1_40627	CDS	-2	1191701	1192198	498	automatic/finished	no			conserved hypothetical protein, RDD domain; putative TRANSMEMBRANE PROTEIN	4 : Unknown function but conserved in other organisms	u : unknown	5 : Inner membrane protein							no			18 : Unknown function ;
CmetNA4v1_40628	CDS	-3	1192342	1193148	807	automatic/finished	no			putative lipoprotein	3 : Putative function from multiple computational evidences	lp : lipoprotein	1 : Unknown							no
CmetNA4v1_40629	CDS	-3	1193152	1193589	438	automatic/finished	no			conserved hypothetical protein; putative transmembrane protein	4 : Unknown function but conserved in other organisms	u : unknown	1 : Unknown							no			18 : Unknown function ;
CmetNA4v1_40630	CDS	-1	1193586	1194152	567	automatic/finished	no			RNA POLYMERASE SIGMA FACTOR	2b : Function from indirect experimental evidences (e.g. phenotypes)	f : factor	2 : Cytoplasmic	3.1.2.1 : Sigma factors, anti-sigmafactors ;						no			12.1 : DNA interactions ;
CmetNA4v1_40631	CDS		1194170	1194349	180	automatic/finished	no			conserved protein of unknown function	4 : Unknown function but conserved in other organisms	u : unknown	1 : Unknown							no
CmetNA4v1_40632	CDS		1194531	1196294	1764	automatic/finished	no	ilvI		acetolactate synthase III, valine-sensitive, large subunit	2a : Function from experimental evidences in other organisms	e : enzyme	1 : Unknown	1.5.1.18 : Isoleucine/valine ;	2.2.1.6	ACETOOHBUTSYN-RXN$ACETOLACTSYN-RXN	ILEUSYN-PWY$VALSYN-PWY			no			1.4 : Pyruvate family ;
CmetNA4v1_40633	CDS		1196294	1196785	492	automatic/finished	no	ilvH	brnP	acetolactate synthase III, valine-sensitive, small subunit	2a : Function from experimental evidences in other organisms	e : enzyme	1 : Unknown	1.5.1.18 : Isoleucine/valine ;	2.2.1.6	ACETOOHBUTSYN-RXN$ACETOLACTSYN-RXN	ILEUSYN-PWY$VALSYN-PWY			no			1.4 : Pyruvate family ;
CmetNA4v1_40634	CDS		1196923	1197939	1017	automatic/finished	no	ilvC	RS03640	KETOL-ACID REDUCTOISOMERASE	2a : Function from experimental evidences in other organisms	e : enzyme	2 : Cytoplasmic	1.5.1.18 : Isoleucine/valine ; 5.14 : Nodulation ;	1.1.1.86	ACETOOHBUTREDUCTOISOM-RXN$ACETOLACTREDUCTOISOM-RXN	ILEUSYN-PWY$VALSYN-PWY			no	1744032		1.4 : Pyruvate family ; 15 : Cellular processes ;
CmetNA4v1_40635	CDS		1198152	1198805	654	automatic/finished	no			Phosphatidylserine decarboxylase	2b : Function from indirect experimental evidences (e.g. phenotypes)	e : enzyme	11 : Membrane	1.6.1 : Phospholipid ;	4.1.1.65	PHOSPHASERDECARB-RXN	PWY-5669			no			3.1 : Biosynthesis ;
CmetNA4v1_40636	CDS		1198831	1199724	894	automatic/finished	no	pssA	RS03638	CDP-diacylglycerol--serine O-phosphatidyltransferase	2b : Function from indirect experimental evidences (e.g. phenotypes)	e : enzyme	5 : Inner membrane protein	1.6.1 : Phospholipid ;	2.7.8.8	PHOSPHASERSYN-RXN	PWY-5669			no			3.1 : Biosynthesis ;
CmetNA4v1_40637	CDS		1199813	1200313	501	automatic/finished	no			conserved hypothetical protein, Peptidoglycan-binding LysM domain	4 : Unknown function but conserved in other organisms	u : unknown	1 : Unknown							no			18 : Unknown function ;
CmetNA4v1_40638	CDS		1200623	1202164	1542	automatic/finished	no	leuA		2-isopropylmalate synthase	2a : Function from experimental evidences in other organisms	e : enzyme	2 : Cytoplasmic	1.5.1.19 : Leucine ; 7.1 : Cytoplasm ;	2.3.3.13	2-ISOPROPYLMALATESYN-RXN	LEUSYN-PWY			no			1.4 : Pyruvate family ;
CmetNA4v1_40639	CDS	-2	1202261	1202794	534	automatic/finished	no			putative TRANSMEMBRANE LIPOPROTEIN	3 : Putative function from multiple computational evidences	lp : lipoprotein	11 : Membrane							no
CmetNA4v1_40640	CDS		1203008	1204285	1278	automatic/finished	no			putative branched amino acid ABC TRANSPORTER, periplasmic component	3 : Putative function from multiple computational evidences	t : transporter	9 : Periplasmic	4.3.A.1.p : periplasmic binding component ;						no			7 : Transport and binding proteins ;
CmetNA4v1_40641	CDS		1204451	1204720	270	automatic/finished	no	rpsO	secC	30S ribosomal subunit protein S15	2a : Function from experimental evidences in other organisms	s : structure	2 : Cytoplasmic	2.3.2 : Translation ; 2.3.8 : Ribosomal proteins ; 6.6 : Ribosome ; 7.1 : Cytoplasm ;						no			10.2 : Ribosomal proteins: synthesis and modification ; 10.4 : Translation factors ;
CmetNA4v1_40642	CDS		1205186	1207363	2178	automatic/finished	no	pnp	bfl	polynucleotide phosphorylase/polyadenylase	2a : Function from experimental evidences in other organisms	e : enzyme	2 : Cytoplasmic	1.2.1 : RNA ; 2.2.4 : RNA degradation ; 7.1 : Cytoplasm ;	2.7.7.8	RXN0-6479$2.7.7.8-RXN	PWY0-1479			no	10215858, 10411741		9.1 : Degradation of RNA ;
CmetNA4v1_40643	CDS		1207532	1208536	1005	automatic/finished	no			putative NADPH QUINONE OXIDOREDUCTASE	3 : Putative function from multiple computational evidences	e : enzyme	1 : Unknown		1.6.5.5	QOR-RXN$NQOR-RXN$RXN-12303$RXN0-5387				no
CmetNA4v1_40644	CDS		1208664	1209401	738	automatic/finished	no	tpiA	tpi	triosephosphate isomerase	2a : Function from experimental evidences in other organisms	e : enzyme	1 : Unknown	1.1.1.23 : Galactose degradation ; 1.3.1 : Glycolysis ;	5.3.1.1	TRIOSEPISOMERIZATION-RXN	PWY-6142$GLYCOLYSIS-E-D$ANAGLYCOLYSIS-PWY$GLYCOLYSIS			no			6.8 : Glycolysis/gluconeogenesis ; 6.11 : Sugars ;
CmetNA4v1_40645	CDS		1209452	1209820	369	automatic/finished	no	secG	prlH	preprotein translocase membrane subunit	2a : Function from experimental evidences in other organisms	t : transporter	5 : Inner membrane protein	4.3.A.5 : The Type II (General) Secretory Pathway (IISP) Family ; 6.1 : Membrane ; 7.3 : Inner membrane ;						no	10732681, 11222599		7 : Transport and binding proteins ;
CmetNA4v1_tRNA5	tRNA		1210018	1210102	85	automatic/finished	no			Leu tRNA												tRNA Leu anticodon GAG, Cove score 63.68
CmetNA4v1_40646	CDS		1210271	1210630	360	automatic/finished	no	nuoA	RS03627	NADH:ubiquinone oxidoreductase complex I, membrane subunit A	2a : Function from experimental evidences in other organisms	e : enzyme	5 : Inner membrane protein	1.3.6 : Aerobic respiration ; 1.3.7 : Anaerobic respiration ; 1.4.1 : Electron donor ; 4.3.D.1 : The Proton- or sodium ion-translocating NADH Dehydrogenase (NDH) Family ;	1.6.5.3	RXN0-5248$RXN0-5244$RXN0-5267$RXN0-5388$NADH-DEHYDROG-A-RXN$RXN0-5254	PWY0-1352$PWY0-1347$PWY0-1334$PWY0-1335$PWY-3781			no	9593861		6.1 : Aerobic ; 6.3 : Anaerobic ; 6.5 : Electron transport ; 7 : Transport and binding proteins ;
CmetNA4v1_40647	CDS		1210637	1211119	483	automatic/finished	no	nuoB	RS03626	NADH:ubiquinone oxidoreductase complex I, chain B	2a : Function from experimental evidences in other organisms	e : enzyme	2 : Cytoplasmic	1.3.6 : Aerobic respiration ; 1.3.7 : Anaerobic respiration ; 1.4.1 : Electron donor ; 4.3.D.1 : The Proton- or sodium ion-translocating NADH Dehydrogenase (NDH) Family ;	1.6.5.3	RXN0-5248$RXN0-5244$RXN0-5267$RXN0-5388$NADH-DEHYDROG-A-RXN$RXN0-5254	PWY0-1352$PWY0-1347$PWY0-1334$PWY0-1335$PWY-3781			no	9593861		6.1 : Aerobic ; 6.3 : Anaerobic ; 6.5 : Electron transport ; 7 : Transport and binding proteins ;
CmetNA4v1_40648	CDS		1211121	1211720	600	automatic/finished	no	nuoC	RS03625	NADH:ubiquinone oxidoreductase complex I, chain C	2a : Function from experimental evidences in other organisms	e : enzyme	2 : Cytoplasmic	1.3.6 : Aerobic respiration ; 1.3.7 : Anaerobic respiration ; 1.4.1 : Electron donor ; 4.3.D.1 : The Proton- or sodium ion-translocating NADH Dehydrogenase (NDH) Family ;	1.6.5.3	RXN0-5248$RXN0-5244$RXN0-5267$NADH-DEHYDROG-A-RXN	PWY0-1334$PWY0-1335$PWY-3781			no	9593861		6.1 : Aerobic ; 6.3 : Anaerobic ; 6.5 : Electron transport ; 7 : Transport and binding proteins ;
CmetNA4v1_40649	CDS		1211730	1212983	1254	automatic/finished	no	nuoD	RS03624	NADH:ubiquinone oxidoreductase complex I, chain D	2a : Function from experimental evidences in other organisms	e : enzyme	2 : Cytoplasmic	1.3.6 : Aerobic respiration ; 1.3.7 : Anaerobic respiration ; 1.4.1 : Electron donor ; 4.3.D.1 : The Proton- or sodium ion-translocating NADH Dehydrogenase (NDH) Family ;	1.6.5.3	RXN0-5248$RXN0-5244$RXN0-5267$NADH-DEHYDROG-A-RXN	PWY0-1334$PWY0-1335$PWY-3781			no	9593861		6.1 : Aerobic ; 6.3 : Anaerobic ; 6.5 : Electron transport ; 7 : Transport and binding proteins ;
CmetNA4v1_40650	CDS		1213189	1213695	507	automatic/finished	no	nuoE	RS03623	NADH:ubiquinone oxidoreductase complex I, chain E	2a : Function from experimental evidences in other organisms	e : enzyme	2 : Cytoplasmic	1.3.6 : Aerobic respiration ; 1.3.7 : Anaerobic respiration ; 1.4.1 : Electron donor ; 4.3.D.1 : The Proton- or sodium ion-translocating NADH Dehydrogenase (NDH) Family ;	1.6.5.3	RXN0-5248$RXN0-5244$RXN0-5267$NADH-DEHYDROG-A-RXN	PWY0-1334$PWY0-1335$PWY-3781			no	9593861		6.1 : Aerobic ; 6.3 : Anaerobic ; 6.5 : Electron transport ; 7 : Transport and binding proteins ;
CmetNA4v1_40651	CDS		1213697	1214992	1296	automatic/finished	no	nuoF	nuoB	NADH:ubiquinone oxidoreductase complex I, chain F	2a : Function from experimental evidences in other organisms	e : enzyme	2 : Cytoplasmic	1.3.6 : Aerobic respiration ; 1.3.7 : Anaerobic respiration ; 1.4.1 : Electron donor ; 4.3.D.1 : The Proton- or sodium ion-translocating NADH Dehydrogenase (NDH) Family ; 7.1 : Cytoplasm ;	1.6.5.3	RXN0-5248$RXN0-5244$RXN0-5267$RXN0-5388$NADH-DEHYDROG-A-RXN$RXN0-5254	PWY0-1352$PWY0-1347$PWY0-1334$PWY0-1335$PWY-3781			no	9593861		6.1 : Aerobic ; 6.3 : Anaerobic ; 6.5 : Electron transport ; 7 : Transport and binding proteins ;
CmetNA4v1_40652	CDS		1215006	1217378	2373	automatic/finished	no	nuoG	RS03621	NADH:ubiquinone oxidoreductase complex I, chain G	2a : Function from experimental evidences in other organisms	e : enzyme	2 : Cytoplasmic	1.3.6 : Aerobic respiration ; 1.3.7 : Anaerobic respiration ; 1.4.1 : Electron donor ; 4.3.D.1 : The Proton- or sodium ion-translocating NADH Dehydrogenase (NDH) Family ;	1.6.5.3	RXN0-5248$RXN0-5244$RXN0-5267$RXN0-5388$NADH-DEHYDROG-A-RXN$RXN0-5254	PWY0-1352$PWY0-1347$PWY0-1334$PWY0-1335$PWY-3781			no	9593861		6.1 : Aerobic ; 6.3 : Anaerobic ; 6.5 : Electron transport ; 7 : Transport and binding proteins ;
CmetNA4v1_40653	CDS		1217397	1218461	1065	automatic/finished	no	nuoH		NADH:ubiquinone oxidoreductase complex I, chain H	2a : Function from experimental evidences in other organisms	e : enzyme	5 : Inner membrane protein	1.3.6 : Aerobic respiration ; 1.3.7 : Anaerobic respiration ; 1.4.1 : Electron donor ; 4.3.D.1 : The Proton- or sodium ion-translocating NADH Dehydrogenase (NDH) Family ; 6.1 : Membrane ; 7.3 : Inner membrane ;	1.6.5.3	RXN0-5248$RXN0-5244$RXN0-5267$RXN0-5388$NADH-DEHYDROG-A-RXN$RXN0-5254	PWY0-1352$PWY0-1347$PWY0-1334$PWY0-1335$PWY-3781			no	9593861		6.1 : Aerobic ; 6.3 : Anaerobic ; 6.5 : Electron transport ; 7 : Transport and binding proteins ;
CmetNA4v1_40654	CDS		1218533	1219024	492	automatic/finished	no	nuoI		NADH:ubiquinone oxidoreductase complex I, chain I	2a : Function from experimental evidences in other organisms	e : enzyme	2 : Cytoplasmic	1.3.6 : Aerobic respiration ; 1.3.7 : Anaerobic respiration ; 1.4.1 : Electron donor ; 4.3.D.1 : The Proton- or sodium ion-translocating NADH Dehydrogenase (NDH) Family ; 7.1 : Cytoplasm ;	1.6.5.3	RXN0-5248$RXN0-5244$RXN0-5267$RXN0-5388$NADH-DEHYDROG-A-RXN$RXN0-5254	PWY0-1352$PWY0-1347$PWY0-1334$PWY0-1335$PWY-3781			no	9593861		6.1 : Aerobic ; 6.3 : Anaerobic ; 6.5 : Electron transport ; 7 : Transport and binding proteins ;
CmetNA4v1_40655	CDS		1219188	1219829	642	automatic/finished	no	nuoJ	RS03618	NADH:ubiquinone oxidoreductase complex I, chain J	2a : Function from experimental evidences in other organisms	e : enzyme	5 : Inner membrane protein	1.3.6 : Aerobic respiration ; 1.3.7 : Anaerobic respiration ; 1.4.1 : Electron donor ; 4.3.D.1 : The Proton- or sodium ion-translocating NADH Dehydrogenase (NDH) Family ;	1.6.5.3	RXN0-5248$RXN0-5244$RXN0-5267$RXN0-5388$NADH-DEHYDROG-A-RXN$RXN0-5254	PWY0-1352$PWY0-1347$PWY0-1334$PWY0-1335$PWY-3781			no	9593861		6.1 : Aerobic ; 6.3 : Anaerobic ; 6.5 : Electron transport ; 7 : Transport and binding proteins ;
CmetNA4v1_40656	CDS		1219847	1220152	306	automatic/finished	no	nuoK		NADH:ubiquinone oxidoreductase complex I, chain K	2a : Function from experimental evidences in other organisms	e : enzyme	5 : Inner membrane protein	1.3.6 : Aerobic respiration ; 1.3.7 : Anaerobic respiration ; 1.4.1 : Electron donor ; 4.3.D.1 : The Proton- or sodium ion-translocating NADH Dehydrogenase (NDH) Family ; 6.1 : Membrane ; 7.3 : Inner membrane ;	1.6.5.3	RXN0-5248$RXN0-5244$RXN0-5267$RXN0-5388$NADH-DEHYDROG-A-RXN$RXN0-5254	PWY0-1352$PWY0-1347$PWY0-1334$PWY0-1335$PWY-3781			no	9593861		6.1 : Aerobic ; 6.3 : Anaerobic ; 6.5 : Electron transport ; 7 : Transport and binding proteins ;
CmetNA4v1_40657	CDS		1220214	1222292	2079	automatic/finished	no	nuoL		NADH:ubiquinone oxidoreductase complex I, chain L	2a : Function from experimental evidences in other organisms	e : enzyme	5 : Inner membrane protein	1.3.6 : Aerobic respiration ; 1.3.7 : Anaerobic respiration ; 1.4.1 : Electron donor ; 4.3.D.1 : The Proton- or sodium ion-translocating NADH Dehydrogenase (NDH) Family ; 6.1 : Membrane ; 7.3 : Inner membrane ;	1.6.5.3	RXN0-5248$RXN0-5244$RXN0-5267$RXN0-5388$NADH-DEHYDROG-A-RXN$RXN0-5254	PWY0-1352$PWY0-1347$PWY0-1334$PWY0-1335$PWY-3781			no	9593861		6.1 : Aerobic ; 6.3 : Anaerobic ; 6.5 : Electron transport ; 7 : Transport and binding proteins ;
CmetNA4v1_40658	CDS		1222321	1223787	1467	automatic/finished	no	nuoM	nuoA	NADH:ubiquinone oxidoreductase complex I, chain M	2a : Function from experimental evidences in other organisms	e : enzyme	5 : Inner membrane protein	1.3.6 : Aerobic respiration ; 1.3.7 : Anaerobic respiration ; 1.4.1 : Electron donor ; 4.3.D.1 : The Proton- or sodium ion-translocating NADH Dehydrogenase (NDH) Family ; 6.1 : Membrane ; 7.3 : Inner membrane ;	1.6.5.3	RXN0-5254$RXN0-5248$RXN0-5244$RXN0-5267$RXN0-5388$NADH-DEHYDROG-A-RXN	PWY0-1352$PWY0-1347$PWY0-1334$PWY0-1335$PWY-3781			no	9593861		6.1 : Aerobic ; 6.3 : Anaerobic ; 6.5 : Electron transport ; 7 : Transport and binding proteins ;
CmetNA4v1_40659	CDS		1223807	1225282	1476	automatic/finished	no	nuoN		NADH:ubiquinone oxidoreductase complex I, chain N	2a : Function from experimental evidences in other organisms	e : enzyme	5 : Inner membrane protein	1.3.6 : Aerobic respiration ; 1.3.7 : Anaerobic respiration ; 1.4.1 : Electron donor ; 4.3.D.1 : The Proton- or sodium ion-translocating NADH Dehydrogenase (NDH) Family ; 6.1 : Membrane ; 7.3 : Inner membrane ;	1.6.5.3	RXN0-5254$RXN0-5248$RXN0-5244$RXN0-5267$RXN0-5388$NADH-DEHYDROG-A-RXN	PWY0-1352$PWY0-1347$PWY0-1334$PWY0-1335$PWY-3781			no	9593861		6.1 : Aerobic ; 6.3 : Anaerobic ; 6.5 : Electron transport ; 7 : Transport and binding proteins ;
CmetNA4v1_40660	CDS		1225304	1225612	309	automatic/finished	no			putative transmembrane lipoprotein	3 : Putative function from multiple computational evidences	lp : lipoprotein	11 : Membrane							no
CmetNA4v1_40661	CDS		1225661	1226296	636	automatic/finished	no			putative ADP-ribose diphosphatase	3 : Putative function from multiple computational evidences	e : enzyme	1 : Unknown	1 : Metabolism ;	3.6.1.13	RXN0-1441				no	8810257		18.1 : Enzymes of unknown specificity ;
CmetNA4v1_40662	CDS		1226503	1226970	468	automatic/finished	no			conserved hypothetical protein, DUF1178	4 : Unknown function but conserved in other organisms	u : unknown	1 : Unknown							no			18 : Unknown function ;
CmetNA4v1_40663	CDS		1227062	1228264	1203	automatic/finished	no			putative ACYL-COA DEHYDROGENASE	3 : Putative function from multiple computational evidences	e : enzyme	1 : Unknown	1 : Metabolism ;	1.3.99.-	ACYLCOADEHYDROG-RXN$RXN-11734	FAO-PWY			no			18.1 : Enzymes of unknown specificity ;
CmetNA4v1_40664	CDS		1228278	1229396	1119	automatic/finished	no			putative ACYL-COA DEHYDROGENASE	3 : Putative function from multiple computational evidences	e : enzyme	1 : Unknown	1 : Metabolism ;	1.3.99.-	ACYLCOADEHYDROG-RXN$RXN-11734	FAO-PWY			no			18.1 : Enzymes of unknown specificity ;
CmetNA4v1_40665	CDS		1229461	1229910	450	automatic/finished	no			putative dehydratase, MaoC-like domain	3 : Putative function from multiple computational evidences	e : enzyme	1 : Unknown	1 : Metabolism ;						no			18.1 : Enzymes of unknown specificity ;
CmetNA4v1_40666	CDS		1229998	1230471	474	automatic/finished	no	nodN-like		nodN-like protein, putative enzyme, MaoC-like domain	2b : Function from indirect experimental evidences (e.g. phenotypes)	e : enzyme	1 : Unknown	1 : Metabolism ;						no			18.1 : Enzymes of unknown specificity ;
CmetNA4v1_40667	CDS		1231074	1232042	969	automatic/finished	no	cyoA		cytochrome o ubiquinol oxidase, subunit II	2a : Function from experimental evidences in other organisms	e : enzyme	5 : Inner membrane protein	1.3.6 : Aerobic respiration ; 1.4.2 : Electron acceptor ; 4.3.D.4 : The Proton-translocating Cytochrome Oxidase (COX) Superfamily ; 6.1 : Membrane ; 7.3 : Inner membrane ;	1.10.3.-	RXN0-5265$TRANS-RXN0-237$RXN0-5267$RXN0-5268	PWY0-1329$PWY0-1335			no	8618822		6.1 : Aerobic ; 6.5 : Electron transport ; 7 : Transport and binding proteins ;
CmetNA4v1_40668	CDS		1232048	1234024	1977	automatic/finished	no	cyoB		cytochrome o ubiquinol oxidase, subunit I	2a : Function from experimental evidences in other organisms	e : enzyme	5 : Inner membrane protein	1.3.6 : Aerobic respiration ; 1.4.2 : Electron acceptor ; 4.3.D.4 : The Proton-translocating Cytochrome Oxidase (COX) Superfamily ; 6.1 : Membrane ; 7.3 : Inner membrane ;	1.10.3.-	RXN0-5265$TRANS-RXN0-237$RXN0-5267$RXN0-5268	PWY0-1329$PWY0-1335			no	8618822		6.1 : Aerobic ; 6.5 : Electron transport ; 7 : Transport and binding proteins ;
CmetNA4v1_40669	CDS		1234030	1234674	645	automatic/finished	no	cyoC		cytochrome o ubiquinol oxidase, subunit III	2a : Function from experimental evidences in other organisms	e : enzyme	5 : Inner membrane protein	1.3.6 : Aerobic respiration ; 1.4.2 : Electron acceptor ; 4.3.D.4 : The Proton-translocating Cytochrome Oxidase (COX) Superfamily ; 6.1 : Membrane ; 7.3 : Inner membrane ;	1.10.3.-	RXN0-5265$TRANS-RXN0-237$RXN0-5267$RXN0-5268	PWY0-1329$PWY0-1335			no	8618822		6.1 : Aerobic ; 6.5 : Electron transport ; 7 : Transport and binding proteins ;
CmetNA4v1_40670	CDS		1234675	1235025	351	automatic/finished	no	cyoD		cytochrome o ubiquinol oxidase, subunit IV	2a : Function from experimental evidences in other organisms	e : enzyme	5 : Inner membrane protein	1.3.6 : Aerobic respiration ; 1.4.2 : Electron acceptor ; 6.1 : Membrane ; 7.3 : Inner membrane ;	1.10.3.-	RXN0-5265$TRANS-RXN0-237$RXN0-5267$RXN0-5268	PWY0-1329$PWY0-1335			no	8618822		6.1 : Aerobic ; 6.5 : Electron transport ;
CmetNA4v1_40671	CDS		1235344	1236603	1260	automatic/finished	no			putative Branched-chain amino acid ABC transporter, periplasmic amino acid- binding component (LivK family)	3 : Putative function from multiple computational evidences	t : transporter	9 : Periplasmic	4.3.A.1.p : periplasmic binding component ;						no			7 : Transport and binding proteins ;
CmetNA4v1_40672	CDS		1236740	1238341	1602	automatic/finished	no			putative Branched-chain amino acid ABC TRANSPORTER, membrane component	3 : Putative function from multiple computational evidences	t : transporter	5 : Inner membrane protein	4.3.A.1.m : membrane component ;						no			7 : Transport and binding proteins ;
CmetNA4v1_40673	CDS		1238343	1239554	1212	automatic/finished	no			putative Branched-chain amino acid ABC TRANSPORTER, membrane component	3 : Putative function from multiple computational evidences	t : transporter	5 : Inner membrane protein	4.3.A.1.m : membrane component ;						no			7 : Transport and binding proteins ;
CmetNA4v1_40674	CDS		1239551	1240399	849	automatic/finished	no			putative Branched-chain amino acid ABC TRANSPORTER, ATP-BINDING component	3 : Putative function from multiple computational evidences	t : transporter	2 : Cytoplasmic	4.3.A.1.a : ATP binding component ;						no			7 : Transport and binding proteins ;
CmetNA4v1_40675	CDS		1240402	1241094	693	automatic/finished	no			putative branched-chain amino acid transporter, ATPase component	3 : Putative function from multiple computational evidences	t : transporter	2 : Cytoplasmic	1.1.3 : Amino acids ; 1.5.1.18 : Isoleucine/valine ; 1.5.1.19 : Leucine ; 4.3.A.1.a : ATP binding component ; 7.1 : Cytoplasm ;						no			1.4 : Pyruvate family ; 6.2 : Amino acids and amines ; 7 : Transport and binding proteins ;
CmetNA4v1_40676	CDS		1241203	1242084	882	automatic/finished	no	ureD	RS03030	UREASE ACCESSORY PROTEIN	2b : Function from indirect experimental evidences (e.g. phenotypes)	f : factor	1 : Unknown	1.8.3 : Nitrogen metabolism ;						no	8550495		5.7 : Nitrogen metabolism ;
CmetNA4v1_40677	CDS		1242119	1242421	303	automatic/finished	no	ureA	RS03029	UREASE, GAMMA SUBUNIT	2b : Function from indirect experimental evidences (e.g. phenotypes)	e : enzyme	1 : Unknown	1.8.3 : Nitrogen metabolism ;	3.5.1.5	UREASE-RXN	PWY-5704			no	8550495		5.7 : Nitrogen metabolism ;
CmetNA4v1_40678	CDS		1242466	1243101	636	automatic/finished	no	ureJ	RS03028	UREASE ACCESSORY TRANSMEMBRANE PROTEIN	2b : Function from indirect experimental evidences (e.g. phenotypes)	f : factor	5 : Inner membrane protein	1.8.3 : Nitrogen metabolism ;						no	8550495		5.7 : Nitrogen metabolism ;
CmetNA4v1_40679	CDS		1243125	1243430	306	automatic/finished	no	ureB	RS02962	UREASE, BETA SUBUNIT	2b : Function from indirect experimental evidences (e.g. phenotypes)	e : enzyme	1 : Unknown	1.8.3 : Nitrogen metabolism ;	3.5.1.5	UREASE-RXN	PWY-5704			no	8550495		5.7 : Nitrogen metabolism ;
CmetNA4v1_40680	CDS		1243430	1245148	1719	automatic/finished	no	ureC	RS02789	UREASE, ALPHA SUBUNIT	2b : Function from indirect experimental evidences (e.g. phenotypes)	e : enzyme	1 : Unknown	1.8.3 : Nitrogen metabolism ;	3.5.1.5	UREASE-RXN	PWY-5704			no	8550495		5.7 : Nitrogen metabolism ;
CmetNA4v1_miscRNA8	misc_RNA	-1	1243583	1243868	286	automatic/finished	no			5_ureB_sRNA												Predicted by Rfam, accession=RF02514, e-value=3.6e-35.
CmetNA4v1_40681	CDS		1245152	1245796	645	automatic/finished	no	ureE	RS03601	UREASE ACCESSORY PROTEIN	2b : Function from indirect experimental evidences (e.g. phenotypes)	f : factor	1 : Unknown	1.8.3 : Nitrogen metabolism ;						no	8550495		5.7 : Nitrogen metabolism ;
CmetNA4v1_40682	CDS		1245830	1246522	693	automatic/finished	no	ureF	RS03600	UREASE ACCESSORY PROTEIN	2b : Function from indirect experimental evidences (e.g. phenotypes)	f : factor	1 : Unknown	1.8.3 : Nitrogen metabolism ;						no	8550495		5.7 : Nitrogen metabolism ;
CmetNA4v1_40683	CDS		1246532	1247155	624	automatic/finished	no	ureG	RS03595	UREASE ACCESSORY PROTEIN	2b : Function from indirect experimental evidences (e.g. phenotypes)	f : factor	1 : Unknown	1.8.3 : Nitrogen metabolism ;						no	8550495		5.7 : Nitrogen metabolism ;
CmetNA4v1_40684	CDS	-2	1247210	1247596	387	automatic/finished	no			putative transcriptional regulator, xenobiotic response element (XRE) family	3 : Putative function from multiple computational evidences	r : regulator	2 : Cytoplasmic	3.1.2 : Transcriptional level ;						no			12.1 : DNA interactions ;
CmetNA4v1_40685	CDS		1247876	1248547	672	automatic/finished	no			conserved protein of unknown function	4 : Unknown function but conserved in other organisms	u : unknown	1 : Unknown							no
CmetNA4v1_40686	CDS	-3	1248556	1249248	693	automatic/finished	no			putative glutathione S-transferase enzyme with thioredoxin-like domain	3 : Putative function from multiple computational evidences	e : enzyme	1 : Unknown	1.7.1 : Unassigned reversible reactions ;						no			5 : Central intermediary metabolism ;
CmetNA4v1_40687	CDS	-3	1249414	1250676	1263	automatic/finished	no			putative ACYL-COA DEHYDROGENASE	3 : Putative function from multiple computational evidences	e : enzyme	1 : Unknown	1 : Metabolism ;	1.3.99.3	LONG-CHAIN-ACYL-COA-DEHYDROGENASE-RXN				no			18.1 : Enzymes of unknown specificity ;
CmetNA4v1_40688	CDS		1250926	1251867	942	automatic/finished	no			putative TRANSCRIPTIONal REGULATOR, LysR family	3 : Putative function from multiple computational evidences	r : regulator	2 : Cytoplasmic	3.1.2 : Transcriptional level ;						no			12.1 : DNA interactions ;
CmetNA4v1_40689	CDS		1251957	1253924	1968	automatic/finished	no	ggt	RS00172	GAMMA-GLUTAMYLTRANSPEPTIDASE (putative PRECURSOR)	2a : Function from experimental evidences in other organisms	e : enzyme	1 : Unknown	1.5.3.10 : Glutathione ;	2.3.2.2	GAMMA-GLUTAMYLTRANSFERASE-RXN				no			4.10 : Glutathione and analogs ;
CmetNA4v1_40690	CDS	-1	1254066	1255067	1002	automatic/finished	no			conserved hypothetical protein, UPF0065	4 : Unknown function but conserved in other organisms	u : unknown	9 : Periplasmic							no	12562821		18 : Unknown function ;
CmetNA4v1_40691	CDS	-1	1255359	1256435	1077	automatic/finished	no			putative Aminoglycoside phosphotransferase	3 : Putative function from multiple computational evidences	e : enzyme	1 : Unknown	5.6.4 : Drug resistance/sensitivity ;		KANAMYCIN-KINASE-RXN				no			15.8 : Toxin production and resistance ;
CmetNA4v1_40692	CDS	-1	1256478	1257257	780	automatic/finished	no	paaG	ydbT	acyl-CoA hydratase, phenylacetic acid degradation (strain W)	2a : Function from experimental evidences in other organisms	e : enzyme	1 : Unknown	1.1.5.1 : Phenylacetic acid degradation ;	4.2.1.17	RXN0-6510	PWY0-321			no	12846838		6 : Energy metabolism ;
CmetNA4v1_40693	CDS	-1	1257324	1258847	1524	automatic/finished	no	paaH	ydbU	3-hydroxybutyryl-CoA dehydrogenase, phenylacetic acid degradation	2a : Function from experimental evidences in other organisms	e : enzyme	1 : Unknown	1.1.5.1 : Phenylacetic acid degradation ;	1.1.1.157	RXN0-2044	PWY0-321			no			6 : Energy metabolism ;
CmetNA4v1_40694	CDS		1259024	1259665	642	automatic/finished	no			putative Glutathione transferase	3 : Putative function from multiple computational evidences	e : enzyme	1 : Unknown	1.5.3.10 : Glutathione ;	2.5.1.18	GST-RXN$GSHTRAN-RXN				no			4.10 : Glutathione and analogs ;
CmetNA4v1_40695	CDS	-2	1259726	1260895	1170	automatic/finished	no	ybdL		methionine aminotransferase, PLP-dependent	2a : Function from experimental evidences in other organisms	e : enzyme	1 : Unknown	1 : Metabolism ;	2.6.1.-	R15-RXN	PWY-6854			no	15280032		18.1 : Enzymes of unknown specificity ;
CmetNA4v1_40696	CDS	-2	1260944	1261483	540	automatic/finished	no			conserved hypothetical protein, DUF132	4 : Unknown function but conserved in other organisms	u : unknown	1 : Unknown							no			18 : Unknown function ;
CmetNA4v1_40697	CDS		1261524	1262309	786	automatic/finished	no			conserved hypothetical protein, DUF328	4 : Unknown function but conserved in other organisms	u : unknown	1 : Unknown							no			18 : Unknown function ;
CmetNA4v1_40698	CDS		1262328	1263470	1143	automatic/finished	no			putative Zinc carboxypeptidase	3 : Putative function from multiple computational evidences	e : enzyme	1 : Unknown	1.2.3 : Proteins/peptides/glycopeptides ;						no			11.4 : Degradation of proteins, peptides, and glycopeptides ;
CmetNA4v1_40699	CDS	-2	1263566	1264360	795	automatic/finished	no			conserved hypothetical protein	4 : Unknown function but conserved in other organisms	u : unknown	1 : Unknown							no			18 : Unknown function ;
CmetNA4v1_40700	CDS	-3	1264612	1265484	873	automatic/finished	no			putative N-formylglutamate amidohydrolase	3 : Putative function from multiple computational evidences	e : enzyme	1 : Unknown	1.1.3.11 : Histidine degradation ;	3.5.-.-	N-FORMYLGLUTAMATE-DEFORMYLASE-RXN	PWY-5028			no			6.2 : Amino acids and amines ;
CmetNA4v1_40701	CDS	-1	1265505	1266491	987	automatic/finished	no			conserved hypothetical protein, UPF0065	4 : Unknown function but conserved in other organisms	u : unknown	9 : Periplasmic							no	12562821		18 : Unknown function ;
CmetNA4v1_40702	CDS		1266640	1267542	903	automatic/finished	no			putative transcriptional regulator, LysR family	3 : Putative function from multiple computational evidences	r : regulator	2 : Cytoplasmic	3.1.2 : Transcriptional level ;						no			12.1 : DNA interactions ;
CmetNA4v1_40703	CDS	-2	1267595	1268770	1176	automatic/finished	no			conserved hypothetical protein, COG3825	4 : Unknown function but conserved in other organisms	u : unknown	1 : Unknown							no			18 : Unknown function ;
CmetNA4v1_40704	CDS	-1	1268787	1269380	594	automatic/finished	no			putative Acetyltransferase/N-acetylase	3 : Putative function from multiple computational evidences	e : enzyme	1 : Unknown							no
CmetNA4v1_40705	CDS	-3	1269391	1270269	879	automatic/finished	no			putative AAA ATPase, type A vWA domain	3 : Putative function from multiple computational evidences	e : enzyme	1 : Unknown							no
CmetNA4v1_40706	CDS		1270712	1271056	345	automatic/finished	no			putative cytochrome c, class IC	3 : Putative function from multiple computational evidences	c : carrier	9 : Periplasmic	1.4.3 : Electron carrier ;						no			6.5 : Electron transport ;
CmetNA4v1_40707	CDS		1271070	1271468	399	automatic/finished	no			putative cytochrome c, class IC	3 : Putative function from multiple computational evidences	c : carrier	1 : Unknown	1.4.3 : Electron carrier ;						no			6.5 : Electron transport ;
CmetNA4v1_40708	CDS	-3	1271566	1272645	1080	automatic/finished	no	aroG		3-deoxy-D-arabinoheptulosonate-7-phosphate synthase (DAHP synthetase, phenylalanine-repressible)	2a : Function from experimental evidences in other organisms	e : enzyme	1 : Unknown	1.5.1.13 : Phenylalanine ; 1.5.1.20 : Chorismate ;	2.5.1.54	DAHPSYN-RXN	PWY-6164			no	10425687		1.1 : Aromatic amino acid family ;
CmetNA4v1_50001	CDS	-1	1272849	1273094	246	automatic/finished	no			conserved protein of unknown function	4 : Unknown function but conserved in other organisms	u : unknown	1 : Unknown							no
CmetNA4v1_50002	CDS		1273184	1274239	1056	automatic/finished	no			conserved hypothetical protein; putative (SAM dependent) methyltransferase	4 : Unknown function but conserved in other organisms	u : unknown	1 : Unknown							no			18 : Unknown function ;
CmetNA4v1_50003	CDS	-1	1274295	1275755	1461	automatic/finished	no	tldD	yhdO	antibiotic maturation peptidase	2b : Function from indirect experimental evidences (e.g. phenotypes)	e : enzyme	1 : Unknown	2.3.5 : Export, signal peptide cleavage ; 5.10 : Defense/survival ;						no	12029038		11.1 : Protein and peptide secretion and trafficking ; 15.10 : Adaptations to atypical conditions ;
CmetNA4v1_50004	CDS	-1	1275822	1276643	822	automatic/finished	no			putative Nitrilase/N-carbamoyl-D-aminoacid amidohydrolase	3 : Putative function from multiple computational evidences	e : enzyme	1 : Unknown	1.8.3 : Nitrogen metabolism ;	3.5.5.1	RXN-1404$3.5.5.1-RXN	PWY-5026			no			5.7 : Nitrogen metabolism ;
CmetNA4v1_50005	CDS	-3	1276672	1280868	4197	automatic/finished	no			conserved hypothetical protein, COG3164; putative TRANSMEMBRANE PROTEIN	4 : Unknown function but conserved in other organisms	u : unknown	1 : Unknown							no			18 : Unknown function ;
CmetNA4v1_50006	CDS		1281067	1284054	2988	automatic/finished	no	glnE	RS04556	bifunctional: deadenylyltransferase ; adenylyltransferase for glutamine synthetase	2a : Function from experimental evidences in other organisms	e : enzyme	1 : Unknown	1.5.1.2 : Glutamine ; 1.8.3 : Nitrogen metabolism ; 2.3.3 : Posttranslational modification ;	2.7.7.42	GSADENYLATION-RXN$GSDEADENYLATION-RXN				no	9312015		1.3 : Glutamate family ; 5.7 : Nitrogen metabolism ; 11.2 : Protein modification and repair ;
CmetNA4v1_50007	CDS		1284062	1284655	594	automatic/finished	no			conserved hypothetical protein; putative TRANSMEMBRANE PROTEIN	4 : Unknown function but conserved in other organisms	u : unknown	5 : Inner membrane protein							no			18 : Unknown function ;
CmetNA4v1_50008	CDS	-2	1284854	1286422	1569	automatic/finished	no			putative EXTRACELLULAR PROTEASE, subtilisin-like protein	3 : Putative function from multiple computational evidences	e : enzyme	8 : Outer membrane-associated	1.2.3 : Proteins/peptides/glycopeptides ; 2.3 : Protein related ;	3.4.21.-					no			11.4 : Degradation of proteins, peptides, and glycopeptides ;
CmetNA4v1_50009	CDS	-2	1286522	1286947	426	automatic/finished	no			conserved hypothetical protein; putative transmembrane protein	4 : Unknown function but conserved in other organisms	u : unknown	1 : Unknown							no			18 : Unknown function ;
CmetNA4v1_50010	CDS	-2	1286984	1288753	1770	automatic/finished	no	recN	radB	recombination and repair protein	2a : Function from experimental evidences in other organisms	cp : cell process	2 : Cytoplasmic	2.1.3 : DNA recombination ; 2.1.4 : DNA repair ; 5.8 : SOS response ; 7.1 : Cytoplasm ;						no	16914543		8.1 : DNA replication, recombination, and repair ; 15.10 : Adaptations to atypical conditions ;
CmetNA4v1_50011	CDS	-3	1288834	1289775	942	automatic/finished	no	nadK	yfjB, yfjE	NAD kinase	2b : Function from indirect experimental evidences (e.g. phenotypes)	e : enzyme	1 : Unknown	1.5.3.7 : Nicotinamide adenine dinucleotide (NAD) ;	2.7.1.23	NAD-KIN-RXN	NADPHOS-DEPHOS-PWY			no			4.12 : Pyridine nucleotides ;
CmetNA4v1_50012	CDS		1289852	1290898	1047	automatic/finished	no	hrcA	RS04567	HEAT-INDUCIBLE TRANSCRIPTION REPRESSOR, Negative regulator of class I heat shock protein	2a : Function from experimental evidences in other organisms	r : regulator	2 : Cytoplasmic	3.1.2.3 : Repressor ;						no	8576042		12.1 : DNA interactions ;
CmetNA4v1_50013	CDS		1291009	1292124	1116	automatic/finished	no	hemH	popA, visA	ferrochelatase	2a : Function from experimental evidences in other organisms	e : enzyme	1 : Unknown	1.5.3.12 : Heme, porphyrin ;	4.99.1.1	PROTOHEMEFERROCHELAT-RXN	HEME-BIOSYNTHESIS-II$HEMESYN2-PWY$PWY0-1415			no	8458858		4.3 : Heme, porphyrin, and cobalamin ;
CmetNA4v1_50014	CDS		1292174	1292569	396	automatic/finished	no	hslR	yrfH	ribosome-associated heat shock protein 15	2a : Function from experimental evidences in other organisms	f : factor	2 : Cytoplasmic	5.5.2 : Temperature extremes ; 7.1 : Cytoplasm ; 2.2 : RNA related ;						no	10675343, 10675344, 9867837		9 : Transcription ; 15.10 : Adaptations to atypical conditions ;
CmetNA4v1_50015	CDS	-2	1292621	1292812	192	automatic/finished	no			Putative lipid-like peptide; putative transmembrane protein	3 : Putative function from multiple computational evidences	f : factor	1 : Unknown	2.3.4 : Chaperoning, folding ;						no	10608856		11.3 : Protein folding and stabilization ;
CmetNA4v1_50016	CDS		1293061	1293603	543	automatic/finished	no	grpE		Hsp 24 nucleotide exchange factor	2a : Function from experimental evidences in other organisms	f : factor	2 : Cytoplasmic	2.3.4 : Chaperoning, folding ; 5.1 : Cell division ; 7.1 : Cytoplasm ; 8.1 : Prophage genes and phage related functions ;						no	14984054		11.3 : Protein folding and stabilization ; 15.1 : Cell division ; 17.2 : Prophage functions ;
CmetNA4v1_50017	CDS		1293682	1294086	405	automatic/finished	no			putative THIOREDOXIN PROTEIN	3 : Putative function from multiple computational evidences	e : enzyme	1 : Unknown	1 : Metabolism ;						no			18.1 : Enzymes of unknown specificity ;
CmetNA4v1_50018	CDS	-3	1294075	1295466	1392	automatic/finished	no			outer membrane phospholipase A	2a : Function from experimental evidences in other organisms	e : enzyme	8 : Outer membrane-associated	6.1 : Membrane ; 1 : Metabolism ;	3.1.1.4, 3.1.1.32	RXN-1501$RXN0-6725$PHOSPHOLIPASE-A2-RXN$RXN-12430$RXN0-6952$PHOSPHOLIPASE-A1-RXN	LIPASYN-PWY			no	10322034		18.1 : Enzymes of unknown specificity ;
CmetNA4v1_50019	CDS	-3	1295533	1295964	432	automatic/finished	no			conserved hypothetical protein	4 : Unknown function but conserved in other organisms	u : unknown	1 : Unknown							no			18 : Unknown function ;
CmetNA4v1_50020	CDS		1296115	1297053	939	automatic/finished	no			conserved hypothetical protein, DUF6; putative TRANSMEMBRANE PROTEIN	4 : Unknown function but conserved in other organisms	u : unknown	5 : Inner membrane protein							no			18 : Unknown function ;
CmetNA4v1_50021	CDS		1297141	1297728	588	automatic/finished	no			Putative NADH dehydrogenase/NAD(P)H nitroreductase	3 : Putative function from multiple computational evidences	e : enzyme	1 : Unknown	1.4 : Energy production/transport ;						no			6.5 : Electron transport ;
CmetNA4v1_50022	CDS	-3	1297825	1298550	726	automatic/finished	no			putative Coenzyme Q (ubiquinone) biosynthesis protein Coq4	3 : Putative function from multiple computational evidences	f : factor	1 : Unknown	1.5.3.11 : Menaquinone (MK), ubiquinone (Q) ; 2.3 : Protein related ;						no			4.5 : Menaquinone and ubiquinone ;
CmetNA4v1_50023	CDS	-1	1298580	1299548	969	automatic/finished	no			lactone esterase	2b : Function from indirect experimental evidences (e.g. phenotypes)	e : enzyme	1 : Unknown	1.1 : Carbon compound utilization ;						no	9925571		6 : Energy metabolism ;
CmetNA4v1_50024	CDS	-2	1299545	1301098	1554	automatic/finished	no			Cyclohexanone 1,2-monooxygenase, FAD-binding	2b : Function from indirect experimental evidences (e.g. phenotypes)	e : enzyme	1 : Unknown	1.1 : Carbon compound utilization ;	1.14.13.22	CYCLOHEXANONE-MONOOXYGENASE-RXN				no	3338974		6 : Energy metabolism ;
CmetNA4v1_50025	CDS		1301137	1301766	630	automatic/finished	no			putative transcriptional egulator, TetR family	3 : Putative function from multiple computational evidences	r : regulator	2 : Cytoplasmic	3.1.2 : Transcriptional level ;						no			12.1 : DNA interactions ;
CmetNA4v1_50026	CDS	-3	1301788	1302432	645	automatic/finished	no	nth		endonuclease III; DNA glycosylase/apyrimidinic (AP) lyase, acts on 5-formyluracil and 5-hydroxymethyluracil	2a : Function from experimental evidences in other organisms	e : enzyme	2 : Cytoplasmic	1.2.2 : DNA ; 2.1.5 : DNA degradation ; 5.6.1 : Radiation ; 7.1 : Cytoplasm ;	4.2.99.18	RXN0-2601				no	1411536		8.3 : Degradation of DNA ; 15.5 : Detoxification ;
CmetNA4v1_50027	CDS	-1	1302429	1303268	840	automatic/finished	no	rsxB	ydgM, rnfB	FERREDOXIN [4FE-4S] PROTEIN	2b : Function from indirect experimental evidences (e.g. phenotypes)	c : carrier	1 : Unknown	1.4.3 : Electron carrier ;						no	12773378		6.5 : Electron transport ;
CmetNA4v1_50028	CDS		1303463	1304095	633	automatic/finished	no			putative TRANSCRIPTIONal REGULATOR, TetR family	3 : Putative function from multiple computational evidences	r : regulator	2 : Cytoplasmic	3.1.2 : Transcriptional level ;						no			12.1 : DNA interactions ;
CmetNA4v1_50029	CDS	-2	1304174	1305418	1245	automatic/finished	no	phaZ		POLY[D(-)-3-HYDROXYBUTYRATE](PHB) DEPOLYMERASE	2a : Function from experimental evidences in other organisms	e : enzyme	2 : Cytoplasmic	1.1.2.1 : Degradation of short-chain fatty acids ; 1.7 : Central intermediary metabolism ; 5.6.2 : Detoxification (xenobiotic metabolism) ;	3.1.1.75	3.1.1.75-RXN				no	11114905		6 : Energy metabolism ;
CmetNA4v1_50030	CDS	-2	1305671	1306867	1197	automatic/finished	no	aspC		aspartate aminotransferase	2a : Function from experimental evidences in other organisms	e : enzyme	2 : Cytoplasmic	1.5.1.13 : Phenylalanine ; 1.5.1.14 : Tyrosine ; 1.5.1.19 : Leucine ; 7.1 : Cytoplasm ;	2.6.1.1	3-SULFINOALANINE-AMINOTRANSFERASE-RXN$RXN-11737$ASPAMINOTRANS-RXN$RXN-10814	CYSTEINE-DEG-PWY$PWY-6642$PWY-6638$GLUTDEG-PWY$MALATE-ASPARTATE-SHUTTLE-PWY$PWY-5913			no	1993208		1.1 : Aromatic amino acid family ; 1.4 : Pyruvate family ;
CmetNA4v1_50031	CDS		1307065	1309158	2094	automatic/finished	no	uvrB	dar-1, dar-6	ATP-dependent DNA excision repair enzyme, DNA damage recognition component	2a : Function from experimental evidences in other organisms	e : enzyme	2 : Cytoplasmic	1.2.2 : DNA ; 2.1.4 : DNA repair ; 2.1.5 : DNA degradation ; 5.6.1 : Radiation ; 5.8 : SOS response ; 7.1 : Cytoplasm ;		RXN0-2621				no	12145219		8.1 : DNA replication, recombination, and repair ; 8.3 : Degradation of DNA ; 15.5 : Detoxification ; 15.10 : Adaptations to atypical conditions ;
CmetNA4v1_50032	CDS		1309253	1309474	222	automatic/finished	no			conserved hypothetical protein	4 : Unknown function but conserved in other organisms	u : unknown	1 : Unknown							no			18 : Unknown function ;
CmetNA4v1_50033	CDS		1309525	1309764	240	automatic/finished	no			conserved hypothetical protein	4 : Unknown function but conserved in other organisms	u : unknown	1 : Unknown							no			18 : Unknown function ;
CmetNA4v1_50034	CDS		1309814	1310293	480	automatic/finished	no			putative Protein-tyrosine-phosphatase	3 : Putative function from multiple computational evidences	e : enzyme	2 : Cytoplasmic	5 : Cell processes ;	3.1.3.48	PROTEIN-TYROSINE-PHOSPHATASE-RXN				no			15 : Cellular processes ;
CmetNA4v1_50035	CDS		1310293	1312404	2112	automatic/finished	no			putative SITE-SPECIFIC RECOMBINASE TRANSMEMBRANE PROTEIN	3 : Putative function from multiple computational evidences	e : enzyme	11 : Membrane	2.1.3 : DNA recombination ;						no	9079926		8.1 : DNA replication, recombination, and repair ;
CmetNA4v1_50036	CDS		1312502	1313056	555	automatic/finished	no			putative transcriptional regulator	3 : Putative function from multiple computational evidences	r : regulator	2 : Cytoplasmic	3.1.2 : Transcriptional level ;						no			12.1 : DNA interactions ;
CmetNA4v1_50037	CDS		1313132	1314352	1221	automatic/finished	no	iscS	yfhO, yzzO, nuvC?	cysteine desulfurase (tRNA sulfurtransferase), PLP-dependent	2a : Function from experimental evidences in other organisms	e : enzyme	1 : Unknown	2.3.3 : Posttranslational modification ; 1.5.3.1 : Biotin ; 1.5.3.7 : Nicotinamide adenine dinucleotide (NAD) ; 1.5.3.8 : Thiamine (Vitamin B1) ;	4.4.1.-, 2.8.1.4	RXN-9787$RXN0-308$RXN-12588$RXN-12587	PWY0-1021$PWY-6823			no	10544286, 12860127		4.1 : Biotin ; 4.11 : Thiamine ; 4.12 : Pyridine nucleotides ; 11.2 : Protein modification and repair ;
CmetNA4v1_50038	CDS		1314409	1314810	402	automatic/finished	no	iscU	nifU, yfhN	FeS cluster assembly scaffold protein	2a : Function from experimental evidences in other organisms	f : factor	1 : Unknown	2.3 : Protein related ;						no	10544286
CmetNA4v1_50039	CDS		1314840	1315202	363	automatic/finished	no	iscA	yfhF	Fe-S cluster assembly and activation factor	2a : Function from experimental evidences in other organisms	f : factor	1 : Unknown	2.3.4 : Chaperoning, folding ; 1.5.3.1 : Biotin ; 1.5.3.7 : Nicotinamide adenine dinucleotide (NAD) ; 1.5.3.8 : Thiamine (Vitamin B1) ;						no	10544286		4.1 : Biotin ; 4.11 : Thiamine ; 4.12 : Pyridine nucleotides ; 11.3 : Protein folding and stabilization ;
CmetNA4v1_50040	CDS		1315255	1315785	531	automatic/finished	no	hscB	yfhE, Hsc20	Fe-S clusters assembly co-chaperone protein, regulator of the ATP-dependent activity of HscA	2a : Function from experimental evidences in other organisms	f : factor	1 : Unknown	2.3.4 : Chaperoning, folding ; 1.5.3.1 : Biotin ; 1.5.3.7 : Nicotinamide adenine dinucleotide (NAD) ; 1.5.3.8 : Thiamine (Vitamin B1) ;						no	10544286		4.1 : Biotin ; 4.11 : Thiamine ; 4.12 : Pyridine nucleotides ; 11.3 : Protein folding and stabilization ;
CmetNA4v1_50041	CDS		1315795	1317660	1866	automatic/finished	no	hscA	hsc	Fe-S clusters assembly chaperone (Hsp70 family), ATPase activity	2a : Function from experimental evidences in other organisms	f : factor	2 : Cytoplasmic	2.3.4 : Chaperoning, folding ; 7.1 : Cytoplasm ; 1.5.3.1 : Biotin ; 1.5.3.7 : Nicotinamide adenine dinucleotide (NAD) ; 1.5.3.8 : Thiamine (Vitamin B1) ;		RXN0-1061				no	10544286		4.1 : Biotin ; 4.11 : Thiamine ; 4.12 : Pyridine nucleotides ; 11.3 : Protein folding and stabilization ;
CmetNA4v1_50042	CDS		1317702	1318040	339	automatic/finished	no	fdx		Fe-S clusters assembly [2FE-2S] ferredoxin	2a : Function from experimental evidences in other organisms	c : carrier	1 : Unknown	1.4.3 : Electron carrier ; 1.5.3.1 : Biotin ; 1.5.3.7 : Nicotinamide adenine dinucleotide (NAD) ; 1.5.3.8 : Thiamine (Vitamin B1) ;						no	10544286		4.1 : Biotin ; 4.11 : Thiamine ; 4.12 : Pyridine nucleotides ; 6.5 : Electron transport ;
CmetNA4v1_50043	CDS		1318063	1318257	195	automatic/finished	no	iscX	yfhJ	Fe-S cluster assembly putative chaperon or iron donor protein	2a : Function from experimental evidences in other organisms	f : factor	1 : Unknown	2.3.4 : Chaperoning, folding ; 1.5.3.1 : Biotin ; 1.5.3.7 : Nicotinamide adenine dinucleotide (NAD) ; 1.5.3.8 : Thiamine (Vitamin B1) ;						no	10544286		4.1 : Biotin ; 4.11 : Thiamine ; 4.12 : Pyridine nucleotides ; 11.3 : Protein folding and stabilization ;
CmetNA4v1_50044	CDS	-3	1318318	1319334	1017	automatic/finished	no			conserved exported protein of unknown function	4 : Unknown function but conserved in other organisms	u : unknown	1 : Unknown							no
CmetNA4v1_50045	CDS	-2	1319453	1320142	690	automatic/finished	no			conserved exported protein of unknown function	4 : Unknown function but conserved in other organisms	u : unknown	1 : Unknown							no
CmetNA4v1_50046	CDS	-1	1320420	1321967	1548	automatic/finished	no	lysS	asuD, herC	lysine tRNA synthetase, constitutive	2a : Function from experimental evidences in other organisms	e : enzyme	2 : Cytoplasmic	2.3.1 : Amino acid-activation ; 7.1 : Cytoplasm ;	6.1.1.6	LYSINE--TRNA-LIGASE-RXN	TRNA-CHARGING-PWY			no	2183178		10.1 : tRNA aminoacylation ;
CmetNA4v1_50047	CDS	-2	1322027	1322797	771	automatic/finished	no			putative DEHYDROGENASE/REDUCTASE OXIDOREDUCTASE	3 : Putative function from multiple computational evidences	e : enzyme	1 : Unknown	1.4 : Energy production/transport ;	1.-.-.-					no			6.5 : Electron transport ;
CmetNA4v1_50048	CDS	-2	1322933	1324006	1074	automatic/finished	no	prfB	supK	peptide chain release factor RF-2	2a : Function from experimental evidences in other organisms	f : factor	2 : Cytoplasmic	2.3.2 : Translation ; 7.1 : Cytoplasm ;						no			10.4 : Translation factors ;
CmetNA4v1_50049	CDS		1324242	1324964	723	automatic/finished	no			putative peptidase; putative exported protein	3 : Putative function from multiple computational evidences	e : enzyme	1 : Unknown	1.2.3 : Proteins/peptides/glycopeptides ;						no			11.4 : Degradation of proteins, peptides, and glycopeptides ;
CmetNA4v1_50050	CDS	-1	1325040	1326740	1701	automatic/finished	no	recJ		ssDNA exonuclease, 5' --> 3'-specific, Mg-dependent	2a : Function from experimental evidences in other organisms	e : enzyme	2 : Cytoplasmic	1.2.2 : DNA ; 2.1.4 : DNA repair ; 2.1.5 : DNA degradation ; 7.1 : Cytoplasm ;	3.1.-.-	RXN0-2622				no	7968921		8.1 : DNA replication, recombination, and repair ; 8.3 : Degradation of DNA ;
CmetNA4v1_50051	CDS	-3	1326787	1327905	1119	automatic/finished	no			conserved hypothetical protein	4 : Unknown function but conserved in other organisms	u : unknown	1 : Unknown							no			18 : Unknown function ;
CmetNA4v1_50052	CDS		1328009	1329259	1251	automatic/finished	no	lolE	ycfW	outer membrane lipoproteins ABC transporter, membrane component	2b : Function from indirect experimental evidences (e.g. phenotypes)	t : transporter	5 : Inner membrane protein	4.3.A.1.m : membrane component ; 6.1 : Membrane ; 7.3 : Inner membrane ;						no			7 : Transport and binding proteins ;
CmetNA4v1_50053	CDS		1329252	1330001	750	automatic/finished	no	lolD	ycfV	outer membrane lipoproteins ABC transporter, ATP_binding component	2b : Function from indirect experimental evidences (e.g. phenotypes)	t : transporter	2 : Cytoplasmic	4.3.A.1.a : ATP binding component ; 7.1 : Cytoplasm ;						no			7 : Transport and binding proteins ;
CmetNA4v1_50054	CDS		1330075	1330902	828	automatic/finished	no			putative DNAse, hydrolase with metallo-dependent hydrolase domain	3 : Putative function from multiple computational evidences	e : enzyme	1 : Unknown	2.1.5 : DNA degradation ;	3.1.21.-					no			8.3 : Degradation of DNA ;
CmetNA4v1_50055	CDS		1331104	1333587	2484	automatic/finished	no			putative TRANSPORTER, DNA internalization/competence protein ComEC/Rec2 family	3 : Putative function from multiple computational evidences	t : transporter	11 : Membrane	4.3.A.7 : The Type IV (Conjugal DNA-Protein Transfer) Secretory Pathway (IVSP) Family ;						no			7 : Transport and binding proteins ;
CmetNA4v1_50056	CDS	-1	1333554	1334570	1017	automatic/finished	no			putative transcriptional regulator, RpiR/GlvR family (HTH and SIS (phosphosugar-binding) domains)	3 : Putative function from multiple computational evidences	r : regulator	2 : Cytoplasmic	3.1.2 : Transcriptional level ;						no	11489864		12.1 : DNA interactions ;
CmetNA4v1_50057	CDS	-1	1334673	1334765	93	automatic/finished	no			protein of unknown function	5 : Unknown function	u : unknown	1 : Unknown							no
CmetNA4v1_50058	CDS		1334871	1336760	1890	automatic/finished	no	edd		6-phosphogluconate dehydratase	2a : Function from experimental evidences in other organisms	e : enzyme	1 : Unknown	1.3.9 : Entner-Doudoroff pathway ;	4.2.1.12	PGLUCONDEHYDRAT-RXN	GLYCOLYSIS-E-D$ENTNER-DOUDOROFF-PWY			no	8344525		6.6 : Entner-Doudoroff ;
CmetNA4v1_50059	CDS		1336932	1337447	516	automatic/finished	no	gntK		gluconate kinase 2 in GNT I system, thermoresistant	2a : Function from experimental evidences in other organisms	e : enzyme	1 : Unknown	1.1.1.2 : 2,5-ketogluconate metabolism ; 1.1.1.9 : L-idonate catabolism ; 1.7.9 : Misc. glucose metabolism ;	2.7.1.12	GLUCONOKIN-RXN	GLUCONSUPER-PWY$KETOGLUCONMET-PWY$IDNCAT-PWY			no	9135111		6.11 : Sugars ;
CmetNA4v1_50060	CDS		1337673	1339148	1476	automatic/finished	no			conserved hypothetical protein, DUF404	4 : Unknown function but conserved in other organisms	u : unknown	1 : Unknown							no			18 : Unknown function ;
CmetNA4v1_50061	CDS		1339280	1340233	954	automatic/finished	no			conserved hypothetical protein, DUF403	4 : Unknown function but conserved in other organisms	u : unknown	1 : Unknown							no			18 : Unknown function ;
CmetNA4v1_50062	CDS		1340294	1341175	882	automatic/finished	no			putative Cysteine proteinase, Transglutaminase-like superfamily	3 : Putative function from multiple computational evidences	e : enzyme	1 : Unknown							no
CmetNA4v1_50063	CDS		1341320	1342108	789	automatic/finished	no			conserved hypothetical protein	4 : Unknown function but conserved in other organisms	u : unknown	1 : Unknown							no			18 : Unknown function ;
CmetNA4v1_50064	CDS		1342156	1342977	822	automatic/finished	no			putative hydrolase/acyltransferase	3 : Putative function from multiple computational evidences	e : enzyme	1 : Unknown		3.-.-.-					no
CmetNA4v1_50065	CDS		1343153	1344802	1650	automatic/finished	no	pyrG		CTP synthetase	2a : Function from experimental evidences in other organisms	e : enzyme	1 : Unknown	1.7.33 : Nucleotide and nucleoside conversions ;	6.3.4.2	CTPSYN-RXN	PWY-5687			no	15157079		2.2 : Nucleotide and nucleoside interconversions ;
CmetNA4v1_50066	CDS		1344828	1345697	870	automatic/finished	no	kdsA		3-deoxy-D-manno-octulosonic acid 8-P synthetase	2a : Function from experimental evidences in other organisms	e : enzyme	2 : Cytoplasmic	1.6.5 : K antigen ; 6.1 : Membrane ; 6.2 : Peptidoglycan (murein) ; 6.3 : Surface antigens (ECA, O antigen of LPS) ; 6.7 : Capsule (M and K antigens) ; 7.1 : Cytoplasm ;	2.5.1.55	KDO-8PSYNTH-RXN	PWY-1269$KDO-NAGLIPASYN-PWY			no	10926505, 11371194		14.2 : Biosynthesis and degradation of murein sacculus and peptidoglycan ; 14.3 : Biosynthesis and degradation of surface polysaccharides and lipopolysaccharides ;
CmetNA4v1_50067	CDS		1345826	1346116	291	automatic/finished	no			conserved hypothetical protein, DUF1330	4 : Unknown function but conserved in other organisms	u : unknown	1 : Unknown							no			18 : Unknown function ;
CmetNA4v1_50068	CDS		1346181	1347470	1290	automatic/finished	no	eno		enolase, phosphopyruvate hydratase	2a : Function from experimental evidences in other organisms	e : enzyme	2 : Cytoplasmic	1.1.1.23 : Galactose degradation ; 1.3.1 : Glycolysis ; 1.3.7 : Anaerobic respiration ; 1.7.8 : Gluconeogenesis ; 7.1 : Cytoplasm ;	4.2.1.11	2PGADEHYDRAT-RXN	GLUCONEO-PWY$PWY-6142$PWY-1622$GLYCOLYSIS-E-D$ANAGLYCOLYSIS-PWY$GLYCOLYSIS$ANARESP1-PWY			no			6.3 : Anaerobic ; 6.8 : Glycolysis/gluconeogenesis ; 6.11 : Sugars ;
CmetNA4v1_50069	CDS		1347676	1348017	342	automatic/finished	no	ftsB		Cell division protein ftsB homolog										no
CmetNA4v1_50070	CDS	-1	1348116	1348511	396	automatic/finished	no			conserved exported protein of unknown function	4 : Unknown function but conserved in other organisms	u : unknown	1 : Unknown							no
CmetNA4v1_50071	CDS	-1	1348656	1349660	1005	automatic/finished	no			putative REDOX REGULATED MOLECULAR CHAPERONE HSP33 HEAT-SHOCK-LIKE PROTEIN	3 : Putative function from multiple computational evidences	f : factor	2 : Cytoplasmic	2.3.4 : Chaperoning, folding ; 5.5.6 : Other stresses (mechanical, nutritional, oxidative) ;						no	11377197		11.3 : Protein folding and stabilization ; 15.10 : Adaptations to atypical conditions ;
CmetNA4v1_50072	CDS	-3	1349710	1350234	525	automatic/finished	no			conserved hypothetical protein; putative transferase	4 : Unknown function but conserved in other organisms	u : unknown	1 : Unknown							no			18 : Unknown function ;
CmetNA4v1_50073	CDS		1350360	1351211	852	automatic/finished	no			conserved hypothetical protein, DUF455	4 : Unknown function but conserved in other organisms	u : unknown	1 : Unknown							no			18 : Unknown function ;
CmetNA4v1_50074	CDS	-2	1351208	1352935	1728	automatic/finished	no			putative AMP-dependent synthetase and ligase	3 : Putative function from multiple computational evidences	e : enzyme	1 : Unknown	1 : Metabolism ;	6.2.1.1	ACETATE--COA-LIGASE-RXN	PWY66-162$PWY66-21$PWY0-1313			no			18.1 : Enzymes of unknown specificity ;
CmetNA4v1_50075	CDS		1353081	1353974	894	automatic/finished	no			putative Alpha/beta fold hydrolase	3 : Putative function from multiple computational evidences	e : enzyme	1 : Unknown		3.-.-.-					no
CmetNA4v1_50076	CDS	-2	1354031	1355092	1062	automatic/finished	no			putative THIOREDOXIN REDUCTASE OXIDOREDUCTASE, putative general stress protein	3 : Putative function from multiple computational evidences	e : enzyme	1 : Unknown	1 : Metabolism ; 1.5.2.2 : Pyrimidine biosynthesis ; 5.5 : Adaptation to stress ;	1.8.1.9	THIOREDOXIN-REDUCT-NADPH-RXN	THIOREDOX-PWY			no			2.4 : Pyrimidine ribonucleotide biosynthesis ; 15.10 : Adaptations to atypical conditions ; 18.1 : Enzymes of unknown specificity ;
CmetNA4v1_50077	CDS		1355058	1355183	126	automatic/finished	no			protein of unknown function	5 : Unknown function	u : unknown	1 : Unknown							no
CmetNA4v1_50078	CDS		1355204	1356058	855	automatic/finished	no			conserved hypothetical protein; putative DNA repair enzyme, PHP (Polymerase and Histidinol Phosphatase) domain	4 : Unknown function but conserved in other organisms	u : unknown	1 : Unknown							no			18 : Unknown function ;
CmetNA4v1_50079	CDS		1356080	1356727	648	automatic/finished	no			conserved hypothetical protein	4 : Unknown function but conserved in other organisms	u : unknown	1 : Unknown							no			18 : Unknown function ;
CmetNA4v1_50080	CDS		1356776	1357441	666	automatic/finished	no			putative peptidase, M50 family; putative INTEGRAL MEMBRANE PROTEIN	3 : Putative function from multiple computational evidences	e : enzyme	5 : Inner membrane protein	1.2.3 : Proteins/peptides/glycopeptides ;						no			11.4 : Degradation of proteins, peptides, and glycopeptides ;
CmetNA4v1_50081	CDS		1357482	1358057	576	automatic/finished	no			conserved hypothetical protein	4 : Unknown function but conserved in other organisms	u : unknown	1 : Unknown							no			18 : Unknown function ;
CmetNA4v1_50082	CDS		1358195	1359079	885	automatic/finished	no	dapA		dihydrodipicolinate synthase	2a : Function from experimental evidences in other organisms	e : enzyme	2 : Cytoplasmic	1.5.1.7 : Lysine, diaminopimelate ; 7.1 : Cytoplasm ;	4.2.1.52	DIHYDRODIPICSYN-RXN	DAPLYSINESYN-PWY			no	7853400		1.2 : Aspartate family ;
CmetNA4v1_50083	CDS		1359137	1360378	1242	automatic/finished	no			putative lipoprotein	3 : Putative function from multiple computational evidences	lp : lipoprotein	8 : Outer membrane-associated	6.3 : Surface antigens (ECA, O antigen of LPS) ;						no			14.3 : Biosynthesis and degradation of surface polysaccharides and lipopolysaccharides ;
CmetNA4v1_50084	CDS		1360449	1361237	789	automatic/finished	no			conserved hypothetical protein; putative Metal-dependent hydrolase	4 : Unknown function but conserved in other organisms	u : unknown	1 : Unknown							no			18 : Unknown function ;
CmetNA4v1_50085	CDS	-1	1361247	1361534	288	automatic/finished	no			conserved protein of unknown function	4 : Unknown function but conserved in other organisms	u : unknown	1 : Unknown							no
CmetNA4v1_50086	CDS	-3	1361629	1361856	228	automatic/finished	no			conserved protein of unknown function	4 : Unknown function but conserved in other organisms	u : unknown	1 : Unknown							no
CmetNA4v1_50087	CDS	-1	1361772	1362980	1209	automatic/finished	no			conserved hypothetical protein, COG2850	4 : Unknown function but conserved in other organisms	u : unknown	1 : Unknown							no			18 : Unknown function ;
CmetNA4v1_50088	CDS		1362992	1363525	534	automatic/finished	no	slyD	RS04602	FKBP-TYPE PEPTIDYL-PROLYL CIS-TRANS ISOMERASE (ROTAMASE)	2a : Function from experimental evidences in other organisms	e : enzyme	1 : Unknown	2.3.4 : Chaperoning, folding ;	5.2.1.8	PEPTIDYLPROLYL-ISOMERASE-RXN				no	8300625		11.3 : Protein folding and stabilization ;
CmetNA4v1_50089	CDS	-2	1363529	1363597	69	automatic/finished	no			protein of unknown function	5 : Unknown function	u : unknown	1 : Unknown							no
CmetNA4v1_60001	CDS		1363937	1364572	636	automatic/finished	no			conserved protein of unknown function	4 : Unknown function but conserved in other organisms	u : unknown	1 : Unknown							no
CmetNA4v1_60002	CDS		1364569	1366572	2004	automatic/finished	no			Integrase catalytic region										no
CmetNA4v1_60003	CDS		1366602	1367579	978	automatic/finished	no			conserved protein of unknown function	4 : Unknown function but conserved in other organisms	u : unknown	1 : Unknown							no
CmetNA4v1_60004	CDS		1367548	1368198	651	automatic/finished	no			conserved protein of unknown function	4 : Unknown function but conserved in other organisms	u : unknown	1 : Unknown							no
CmetNA4v1_60005	CDS	-2	1368281	1369870	1590	automatic/finished	no			transposase (fragment)						RXN0-5131				no
CmetNA4v1_60006	CDS	-1	1369902	1370252	351	automatic/finished	no			conserved protein of unknown function	4 : Unknown function but conserved in other organisms	u : unknown	1 : Unknown							no
CmetNA4v1_70001	CDS	-1	1370379	1371416	1038	automatic/finished	no			conserved hypothetical protein; putative TRANSMEMBRANE PROTEIN	4 : Unknown function but conserved in other organisms	u : unknown	1 : Unknown							no			18 : Unknown function ;
CmetNA4v1_70002	CDS	-2	1371413	1374163	2751	automatic/finished	no	mutS	fdv, ant, plm	methyl-directed mismatch repair protein	2a : Function from experimental evidences in other organisms	e : enzyme	2 : Cytoplasmic	2.1.4 : DNA repair ; 7.1 : Cytoplasm ;		RXN0-2625				no	12887908		8.1 : DNA replication, recombination, and repair ;
CmetNA4v1_70003	CDS	-3	1374346	1374750	405	automatic/finished	no			Uncharacterized 14.9 kDa protein in rep-hol intergenic region										no
CmetNA4v1_70004	CDS	-1	1374780	1374959	180	automatic/finished	no			conserved protein of unknown function	4 : Unknown function but conserved in other organisms	u : unknown	1 : Unknown							no
CmetNA4v1_70005	CDS	-2	1375163	1375984	822	automatic/finished	no	suhB	ssyA	inositol monophosphatase	2a : Function from experimental evidences in other organisms	e : enzyme	2 : Cytoplasmic	2.2.2 : Transcription related ; 3.1.3.2 : Covalent modification, demodification, maturation ; 7.1 : Cytoplasm ;	3.1.3.25	RXN0-5408$GLYCEROL-2-PHOSPHATASE-RXN				no			9 : Transcription ; 12.3 : Protein interactions ;
CmetNA4v1_70006	CDS		1376212	1377081	870	automatic/finished	no			tRNA:Cm32/Um32 methyltransferase (TrMet(Xm32))	2b : Function from indirect experimental evidences (e.g. phenotypes)	e : enzyme	2 : Cytoplasmic	2.2.5 : tRNA ;	2.1.1.-	RXN-11866$RXN-11867				no	16848900		10 : Protein synthesis ;
CmetNA4v1_70007	CDS		1377410	1378153	744	automatic/finished	no	cysE		O-ACETYLSERINE SYNTHASE (SERINE ACETYLTRANSFERASE)	2a : Function from experimental evidences in other organisms	e : enzyme	2 : Cytoplasmic	1.5.1.12 : Cysteine ;	2.3.1.30	SERINE-O-ACETTRAN-RXN	CYSTSYN-PWY			no			1.5 : Serine family ;
CmetNA4v1_70008	CDS	-2	1378202	1378993	792	automatic/finished	no	lpxH	ybbF	UDP-2,3-diacylglucosamine hydrolase	2b : Function from indirect experimental evidences (e.g. phenotypes)	e : enzyme	1 : Unknown	1.6.3.3 : Lipid A ; 6.1 : Membrane ; 6.2 : Peptidoglycan (murein) ; 6.3 : Surface antigens (ECA, O antigen of LPS) ;	3.6.1.-	LIPIDXSYNTHESIS-RXN	KDO-NAGLIPASYN-PWY$NAGLIPASYN-PWY			no			14.2 : Biosynthesis and degradation of murein sacculus and peptidoglycan ; 14.3 : Biosynthesis and degradation of surface polysaccharides and lipopolysaccharides ;
CmetNA4v1_70009	CDS	-3	1379062	1379562	501	automatic/finished	no	ppiB		peptidyl-prolyl cis-trans isomerase B (rotamase B)	2b : Function from indirect experimental evidences (e.g. phenotypes)	e : enzyme	2 : Cytoplasmic	2.3.4 : Chaperoning, folding ; 7.1 : Cytoplasm ;	5.2.1.8	PEPTIDYLPROLYL-ISOMERASE-RXN				no	2007139		11.3 : Protein folding and stabilization ;
CmetNA4v1_70010	CDS	-3	1379617	1380225	609	automatic/finished	no	ppiA	rot	peptidyl-prolyl cis-trans isomerase A (rotamase A)	2b : Function from indirect experimental evidences (e.g. phenotypes)	e : enzyme	9 : Periplasmic	2.3.4 : Chaperoning, folding ;	5.2.1.8	PEPTIDYLPROLYL-ISOMERASE-RXN				no	2007139		11.3 : Protein folding and stabilization ;
CmetNA4v1_70011	CDS	-3	1380307	1381032	726	automatic/finished	no			conserved hypothetical protein, TPR repeats; putative exported PROTEIN	4 : Unknown function but conserved in other organisms	u : unknown	1 : Unknown							no			18 : Unknown function ;
CmetNA4v1_70012	CDS		1381157	1382632	1476	automatic/finished	no	cysS		cysteine tRNA synthetase	2a : Function from experimental evidences in other organisms	e : enzyme	2 : Cytoplasmic	2.3.1 : Amino acid-activation ; 7.1 : Cytoplasm ;	6.1.1.16	CYSTEINE--TRNA-LIGASE-RXN	TRNA-CHARGING-PWY			no	12032090, 8165127		10.1 : tRNA aminoacylation ;
CmetNA4v1_70013	CDS		1382629	1383414	786	automatic/finished	no			putative DNA-3-methyladenine glycosylase II	3 : Putative function from multiple computational evidences	e : enzyme	2 : Cytoplasmic	5 : Cell processes ; 2.1 : DNA related ;		3.2.2.21-RXN				no			8 : DNA metabolism ; 15 : Cellular processes ;
CmetNA4v1_70014	CDS		1383562	1384533	972	automatic/finished	no	accA		acetylCoA carboxylase, carboxytransferase subunit alpha	2a : Function from experimental evidences in other organisms	e : enzyme	2 : Cytoplasmic	1.5.4 : Fatty acid and phosphatidic acid ; 7.1 : Cytoplasm ;	6.4.1.2	RXN0-5055$ACETYL-COA-CARBOXYLTRANSFER-RXN	PWY0-1264$PWY-4381			no	11157970		3.1 : Biosynthesis ;
CmetNA4v1_70015	CDS		1384535	1385998	1464	automatic/finished	no	tilS	mesJ, yaeN	tRNA(Ile)-lysidine synthetase	2a : Function from experimental evidences in other organisms	e : enzyme	1 : Unknown	5.1 : Cell division ;	6.1.1.5	RXN-1961				no	14527414		15.1 : Cell division ;
CmetNA4v1_70016	CDS		1385880	1386047	168	automatic/finished	no			conserved protein of unknown function	4 : Unknown function but conserved in other organisms	u : unknown	1 : Unknown							no
CmetNA4v1_70017	CDS		1386177	1387427	1251	automatic/finished	no	lysC	RS04558	ASPARTATE KINASE PROTEIN	2b : Function from indirect experimental evidences (e.g. phenotypes)	e : enzyme	1 : Unknown	1.5.1 : Amino acids ;	2.7.2.4	ASPARTATEKIN-RXN	DAPLYSINESYN-PWY$HOMOSERSYN-PWY			no	1980002		1 : Amino acid biosynthesis ;
CmetNA4v1_tRNA6	tRNA		1387561	1387654	94	automatic/finished	no			Ser tRNA												tRNA Ser anticodon GCT, Cove score 72.75
CmetNA4v1_70018	CDS		1387772	1389466	1695	automatic/finished	no			putative Phage integrase	3 : Putative function from multiple computational evidences									no
CmetNA4v1_70019	CDS	-3	1389622	1389858	237	automatic/finished	no			Helix-turn-helix motif (fragment)										no
CmetNA4v1_70020	CDS		1390203	1390661	459	automatic/finished	no			conserved protein of unknown function	4 : Unknown function but conserved in other organisms	u : unknown	1 : Unknown							no
CmetNA4v1_80001	CDS	-2	1390826	1394215	3390	automatic/finished	no			protein of unknown function	5 : Unknown function	u : unknown	1 : Unknown							no
CmetNA4v1_80002	CDS		1394303	1394932	630	automatic/finished	no			conserved protein of unknown function	4 : Unknown function but conserved in other organisms	u : unknown	1 : Unknown							no
CmetNA4v1_90001	CDS		1395091	1395387	297	automatic/finished	no			conserved protein of unknown function	4 : Unknown function but conserved in other organisms	u : unknown	1 : Unknown							no
CmetNA4v1_90002	CDS		1395384	1396277	894	automatic/finished	no			conserved protein of unknown function	4 : Unknown function but conserved in other organisms	u : unknown	1 : Unknown							no
CmetNA4v1_100001	CDS	-3	1396681	1398234	1554	automatic/finished	no			protein of unknown function	5 : Unknown function	u : unknown	1 : Unknown							no
CmetNA4v1_110001	CDS	-1	1398513	1400117	1605	automatic/finished	no			conserved protein of unknown function	4 : Unknown function but conserved in other organisms	u : unknown	1 : Unknown							no
CmetNA4v1_110002	CDS	-1	1400148	1400495	348	automatic/finished	no			conserved protein of unknown function	4 : Unknown function but conserved in other organisms	u : unknown	1 : Unknown							no
CmetNA4v1_110003	CDS	-2	1400492	1400872	381	automatic/finished	no			conserved protein of unknown function	4 : Unknown function but conserved in other organisms	u : unknown	1 : Unknown							no
CmetNA4v1_120001	CDS	-3	1401049	1402803	1755	automatic/finished	no			protein of unknown function	5 : Unknown function	u : unknown	1 : Unknown							no
CmetNA4v1_120002	CDS	-3	1402846	1403862	1017	automatic/finished	no			protein of unknown function	5 : Unknown function	u : unknown	1 : Unknown							no
CmetNA4v1_120003	CDS	-1	1403859	1404806	948	automatic/finished	no			protein of unknown function	5 : Unknown function	u : unknown	1 : Unknown							no
CmetNA4v1_120004	CDS	-2	1404803	1405858	1056	automatic/finished	no			protein of unknown function	5 : Unknown function	u : unknown	1 : Unknown							no
CmetNA4v1_120005	CDS		1406152	1406457	306	automatic/finished	no			protein of unknown function	5 : Unknown function	u : unknown	1 : Unknown							no
CmetNA4v1_120006	CDS	-3	1406629	1407039	411	automatic/finished	no			protein of unknown function	5 : Unknown function	u : unknown	1 : Unknown							no
CmetNA4v1_120007	CDS	-2	1407581	1407742	162	automatic/finished	no			protein of unknown function	5 : Unknown function	u : unknown	1 : Unknown							no
CmetNA4v1_120008	CDS	-1	1407750	1409405	1656	automatic/finished	no	ylaB		putative signal transduction protein (EAL domain)	3 : Putative function from multiple computational evidences									no
CmetNA4v1_120009	CDS		1409097	1409471	375	automatic/finished	no			protein of unknown function	5 : Unknown function	u : unknown	1 : Unknown							no
CmetNA4v1_120010	CDS	-3	1409578	1411392	1815	automatic/finished	no			putative diguanylate cyclase (GGDEF domain)	3 : Putative function from multiple computational evidences				4.6.1.-					no
CmetNA4v1_120011	fCDS		1411885	1412544	660	automatic/finished	pseudo	ygjE	ttdT, ygjC	fragment of putative tartrate:succinate antiporter (part 1)	3 : Putative function from multiple computational evidences	t : transporter	5 : Inner membrane protein	4.2.A.47 : The Divalent Anion:Na Symporter (DASS) Family ; 6.1 : Membrane ; 7.3 : Inner membrane ;						no			7 : Transport and binding proteins ;
CmetNA4v1_130001	fCDS		1412672	1413556	885	automatic/finished	pseudo	ygjE	ttdT, ygjC	fragment of putative tartrate:succinate antiporter (part 2)	3 : Putative function from multiple computational evidences	t : transporter	5 : Inner membrane protein	4.2.A.47 : The Divalent Anion:Na Symporter (DASS) Family ; 6.1 : Membrane ; 7.3 : Inner membrane ;						no			7 : Transport and binding proteins ;
CmetNA4v1_140001	CDS		1413804	1414832	1029	automatic/finished	no	adhA		Alcohol dehydrogenase					1.1.1.1	RXN-5424$RXN-5444$RXN-6021$RXN-7657$RXN-7693$RXN-7694$RXN-7700$RXN-7706$R542-RXN$ALCOHOL-DEHYDROG-GENERIC-RXN$ALCOHOL-DEHYDROG-RXN$RXN-10781$RXN-10911$RXN-10915$RXN3O-4113$RXN-12448$ENZRXN-161-RXN	PWY-3722$PWY-5057$PWY-5751$ETOH-ACETYLCOA-ANA-PWY$PWY66-21$FERMENTATION-PWY			no
CmetNA4v1_140002	CDS		1415060	1416109	1050	automatic/finished	no			conserved exported protein of unknown function	4 : Unknown function but conserved in other organisms	u : unknown	1 : Unknown							no
CmetNA4v1_140003	CDS		1416119	1417279	1161	automatic/finished	no			conserved exported protein of unknown function	4 : Unknown function but conserved in other organisms	u : unknown	1 : Unknown							no
CmetNA4v1_140004	CDS		1417535	1418686	1152	automatic/finished	no			putative Outer membrane protein/protective antigen OMA87	3 : Putative function from multiple computational evidences	m : membrane component	8 : Outer membrane-associated	6.3 : Surface antigens (ECA, O antigen of LPS) ;						no			14.3 : Biosynthesis and degradation of surface polysaccharides and lipopolysaccharides ;
CmetNA4v1_140005	CDS	-2	1418717	1419013	297	automatic/finished	no			conserved protein of unknown function	4 : Unknown function but conserved in other organisms	u : unknown	1 : Unknown							no
CmetNA4v1_140006	CDS	-3	1418941	1419276	336	automatic/finished	no			protein of unknown function	5 : Unknown function	u : unknown	1 : Unknown							no
CmetNA4v1_140007	CDS		1419356	1420549	1194	automatic/finished	no	yciC		putative metal chaperone yciC	3 : Putative function from multiple computational evidences									no
CmetNA4v1_140008	CDS		1420610	1421539	930	automatic/finished	no	folE2		GTP cyclohydrolase folE2 1					3.5.4.16	GTP-CYCLOHYDRO-II-RXN$GTP-CYCLOHYDRO-I-RXN$RXN-10055$RXN-10063	RIBOSYN2-PWY$PWY-6147$PWY-6703			no
CmetNA4v1_140009	CDS		1421536	1422954	1419	automatic/finished	no	cysS		Cysteinyl-tRNA synthetase					6.1.1.16	CYSTEINE--TRNA-LIGASE-RXN	TRNA-CHARGING-PWY			no
CmetNA4v1_140010	CDS		1422982	1423545	564	automatic/finished	no			putative 6-pyruvoyl-tetrahydropterin (PTP)synthase	3 : Putative function from multiple computational evidences				4.2.3.12	4.2.3.12-RXN				no
CmetNA4v1_140011	CDS		1423565	1424125	561	automatic/finished	no			conserved protein of unknown function	4 : Unknown function but conserved in other organisms	u : unknown	1 : Unknown							no
CmetNA4v1_140012	CDS		1424129	1425580	1452	automatic/finished	no	allB		Dihydroorotase					3.5.2.3	ALLANTOINASE-RXN	PWY-5697$PWY-5698			no
CmetNA4v1_140013	CDS	-3	1425646	1427832	2187	automatic/finished	no			putative ferric siderophore receptor	3 : Putative function from multiple computational evidences									no
CmetNA4v1_140014	CDS		1428191	1428490	300	automatic/finished	no			putative permease	3 : Putative function from multiple computational evidences	t : transporter	11 : Membrane	4 : Transport ;						no			7 : Transport and binding proteins ;
CmetNA4v1_140015	CDS		1428490	1430118	1629	automatic/finished	no			conserved hypothetical protein, PepSY-associated TM helix	4 : Unknown function but conserved in other organisms	u : unknown	11 : Membrane							no			18 : Unknown function ;
CmetNA4v1_140016	CDS		1430115	1430477	363	automatic/finished	no			putative membrane protein (Modular protein)	3 : Putative function from multiple computational evidences									no
CmetNA4v1_140017	CDS		1430581	1432797	2217	automatic/finished	no	fcuA		Ferrichrome receptor fcuA										no
CmetNA4v1_140018	CDS	-2	1432856	1433224	369	automatic/finished	no			conserved protein of unknown function	4 : Unknown function but conserved in other organisms	u : unknown	1 : Unknown							no
CmetNA4v1_140019	CDS	-1	1433379	1434572	1194	automatic/finished	no	lysA		Diaminopimelate decarboxylase (DAP decarboxylase)					4.1.1.20	DIAMINOPIMDECARB-RXN	DAPLYSINESYN-PWY			no
[truncated: 6,183 more rows]
