# Supplementary material for: Spontaneous mutation in the AgrRS two-component regulatory system ofCupriavidus metalliduransresults in enhanced silver resistance
Source: Royal Society of Chemistry journal article supplement (doi:10.1039/c9mt00123a), 2019-01-01
Supplement: c9mt00123a7.pdf [file c9mt00123a7.pdf]

Supplementary Table S4: Primers used in this study.

| Name                       | Sequence (5' -> 3')*                  |
|----------------------------|---------------------------------------|
| 3xFLAGKM_FW                | CCGACAGTCTGACTACAAAGACCATGAC          |
| 3xFLAGKM_RV                | GTTGCCCGCATATGAATATCCTCCTTAG          |
| 40157_3_FW                 | CGGATTCACCACTCCATGAAAGGCGTCTTCACAGGTG |
| 40157_3_RV                 | TTCGCTATTACGCCAGAACCCTGCTGCGTTTGCCT   |
| 40157_5_FW                 | GAATTGTGAGCGGATAGGACCGTGGCGTGCATGTCA  |
| 40157_5_RV                 | TATCGTATGGGGCTGACACTTTTCCACCTCCCCTCAG |
| 40157_cDNA_FW              | CCGTAATGGTCCGAGAGAT                   |
| 40157_cDNA_RV              | TGCGTCTCGCTTGTCAATAG                  |
| agrR_FW                    | GATCGAATTCACCGTATGGCAGAGGAATTG        |
| agrR_SDM_FW                | GTCATTCTTGCCGTCATGCTGC                |
| agrR_SDM_RV                | CAGATCGTAGTCCCCGTCGAT                 |
| agrRS_BAD_FW               | GATCTCTAGAGTGCAGCTGAGGATGAAAACAT      |
| agrRS_OUT_FW               | GACTCTTAAGGCAACATCGTCGCTATCCGT        |
| agrRS_OUT_RV               | GACTACTAGTGTTCATCCTCAGCTGCACG         |
| agrS_3_RV                  | TTCGCTATTACGCCAGGTTTCCAACCCTACGT      |
| agrS_3FL_FW                | TTCATATGCGGGCAACATCGTCG               |
| agrS_5_FW                  | GAATTGTGAGCGGATAAGCTCCACACGACGC       |
| agrS_5FL_RV                | GTCTTTGTAGTCAGACTGTCGGTTCT            |
| agrS_RV                    | GACTAAGCTTCTTGACCGAGCCATACGAAC        |
| agrS_RV                    | TCAGAAGCTTTCAGGTATGCGGAATTGTC         |
| czcl_cDNA_FW               | GCCGCCTACTGCTTGTATT                   |
| czcl_cDNA_RV               | ATTTGCTGTCTTTCGCGTCT                  |
| czcl_Fw                    | GAATTGTGAGCGGATACAGCTTCCATCGGCCTGTTGC |
| czcl_OUT_FW                | TCAGACTAGTAGACGCGGAGAGCCCTTTC         |
| czcl_OUT_RV                | GATCTCTAGACGATTATAGGCGTTTACGCGAGCG    |
| czcl_Rv                    | TTCGCTATTACGCCAGGGCGAGCTGTTGTCGCGCTT  |
| czcL_cDNA_FW               | AATGCGAGATAGGCCAGATG                  |
| czcL_cDNA_RV               | GGGATGTGAAGGCGGTAATA                  |
| czcL_OUT_FW                | CTAGCTTAAGATCGAGGAAATTGGGGGCTT        |
| czcL_OUT_RV                | CTAGACTAGTACGCAATGATGCCGATACA         |
| KT261_FW                   | CGATGGTACCCCTGGGAACACATCAATCT         |
| KT261_RV                   | GGATGGTACCGCGCTCAGTAGGCAATTTTT        |
| ompC_3_FW                  | CGGATTCACCACTCCATGAACCGTCGAGCGATCGCC  |
| ompC_3_RV                  | TTCGCTATTACGCCAGAGTGCCTGGTGAACGCATTG  |
| ompC_5_FW                  | GAATTGTGAGCGGATACGCCACGCCATATTGTTCA   |
| ompC_5_RV                  | TATCGTATGGGGCTGACATGGACTCTCTCCAGTTA   |
| ompC_cDNA_FW               | TCGAGTACCTCAGCAACGTG                  |
| ompC_cDNA_RV               | GCTTTCGAGATCGAAGATCG                  |
| pACYC184_tet_FW            | actgtcctaattTCAGCCCCATACGATATAAG      |
| pACYC184_tet_RV            | agcccatcaaaggTGGAGTGGTGAATCCGTTAG     |
| pBBR_FW                    | CGATTAAGTTGGGTAACGCC                  |
| pBBR_RV                    | ATTAGGCACCCAGGCTTTA                   |
| pK18_inv_FW                | CCTTTGATGGGCTTCGGAATCGTTTTTC          |
| pK18_inv_RV                | AATTAGGACAGTAGCTGACATTCATCCGG         |
| pK18mob_FW                 | CTGGCGTAATAGCGAAGAGG                  |
| pK18mob_inv_FW             | CGACGTACGAAAACGATTCCGAAGCCCA          |
| pK18mob_inv_RV             | AATCGTACGTACCGCTTTGAGTGAGCTG          |
| pK18mob_RV                 | TATCCGCTCACAATCCACA                   |
| PprsQ <sub>2</sub> _FW     | GATCGGATCCCTCAGACTCGGACATGACTCAT      |
| PprsQ <sub>2</sub> _RV     | CTAGGAGCTCGATGGTTCGCATCTTGGAAAT       |
| prsQ <sub>1</sub> _3_FW    | CGGATTCACCACTCCATGATCCCAGCCAGGC       |
| prsQ <sub>1</sub> _3_RV    | TTCGCTATTACGCCAGCTGGAACAGCTCGGA       |
| prsQ <sub>1</sub> _5_FW    | GAATTGTGAGCGGATACGCTCAGCTCGCGGC       |
| prsQ <sub>1</sub> _5_RV    | TATCGTATGGGGCTGACATGATGGAATCCTCTTTC   |
| prsQ <sub>1</sub> _cDNA_FW | CCTGACCGTTGCCCTGTC                    |
| prsQ <sub>1</sub> _cDNA_RV | CAAACCTTGCCGCTCTTGG                   |
| prsQ <sub>1</sub> _FW      | GACTGGATCCGGGTGCCGAGATGGCTTTCC        |
| prsQ <sub>1</sub> _RV      | GACTAAGCTTTCAGAGCTTGGCGCCGTCC         |
| prsQ <sub>2</sub> _cDNA_FW | CCTGCTCTACACTGCCCTGAC                 |
| prsQ <sub>2</sub> _cDNA_RV | TGAAGCCGCGTCTGTGTA                    |

| <b>Name</b>                          | <b>Sequence (5' -&gt; 3')*</b>     |
|--------------------------------------|------------------------------------|
| prsQ <sub>2</sub> _FW                | GATCGGATCCCTCAGACTCGGACATGACTCAT   |
| prsQ <sub>2</sub> _OUT_FW            | TTATCTTAAGCTTGGAATCCTCTTCGTGA      |
| prsQ <sub>2</sub> _OUT_RV            | GGTCACTAGTTACAGGATGTCGCTCGAT       |
| prsQ <sub>2</sub> _RV                | CTAGAAGCTTTCAGGCCCCGTCGGTGAACACGTC |
| prsQ <sub>2</sub> -czcL_FW           | GATCGGATCCACGCGAGCTACTTCTTCGAG     |
| prsQ <sub>2</sub> -czcL_RV           | CTAGAAGCTTGGTGTGCTGTCGAAGTTCA      |
| prsQ <sub>2</sub> <sup>SDM</sup> _FW | CGAACCATCAAGCAAGCCCTG              |
| prsQ <sub>2</sub> <sup>SDM</sup> _RV | ATCTTGGAATCCTCTTCGTGATATGGGT       |
| prsQ <sub>2</sub> <sup>ASP</sup> _RV | CATCTTGGAATCCTCTTCGTGATATGGG       |
| prsQ <sub>2</sub> <sup>ASP</sup> _FW | GCGCCGCGCAGCGCAGAT                 |
| tet_FW                               | GATCACTAGTTCAGCCCCATACGATATAAG     |
| tet_RV                               | TTATCTTAAGTGGAGTGGTGAATCCGTTAG     |
| tet-3                                | TGGAGTGGTGAATCCGTTAG               |
| tet-3_out                            | TCAGGGACAGCTTCAAGGAT               |
| tet-5                                | TCAGCCCCATACGATATAAG               |
| tet-5_out                            | GACGATGAGCGCATTGTTAG               |
| uvrD-f                               | ACCAGTTGCTCAAGACCTTTGG             |
| uvrD-r                               | CTCCTCACCCACCCGATCA                |

\*Restriction sites are underlined.
